# Supplementary material for: Multifaceted glycodendrimers with programmable bioactivity through convergent, divergent, and accelerated approaches using polyfunctional cyclotriphosphazenes
Source: Royal Society of Chemistry journal article supplement (doi:10.1039/c5py01283j), 2015-01-01
Supplement: c5py01283j1.pdf [file c5py01283j1.pdf]

## ELECTRONIC SUPPORTING INFORMATION

# Multifaceted Glycodendrimers With Programmable Bioactivity Through Convergent, Divergent, and Accelerated Approaches Using Polyfunctional Cyclotriphosphazenes

Leïla Abbassi,<sup>a</sup> Yoann M. Chabre,<sup>\*a</sup> Kottari Naresh,<sup>a</sup> Alexandre A. Arnold,<sup>a</sup> Sabine André,<sup>b</sup> Johan Josserand,<sup>a</sup> Hans-Joachim Gabius,<sup>b</sup> and René Roy<sup>\*a</sup>

<sup>a</sup> Pharmaqam, Department of Chemistry, University du Québec à Montréal, P.O. Box 8888, Succ. Centre-ville, Montréal, Québec, H3C 3P8, CANADA. Fax: +1-514-987-4054; Tel: +1-514-987-3000 ext 2546; E-mail: [chabre.yoann@uqam.ca](mailto:chabre.yoann@uqam.ca) ; [roy.rene@uqam.ca](mailto:roy.rene@uqam.ca)

<sup>b</sup> Institute of Physiological Chemistry, Faculty of Veterinary Medicine, Ludwig-Maximilians-University, Veterinärstrasse 13, 80539 Munich, Germany

### Contents

|    |                                                                                      |             |
|----|--------------------------------------------------------------------------------------|-------------|
| 1. | <b>Materials and Methods</b>                                                         | <b>S2</b>   |
| 2. | <b>Synthetic protocols, Characterization, NMR, IR spectra, Mass, GPC, DLS traces</b> | <b>S4</b>   |
| 3. | <b>Diffusion NMR experiments</b>                                                     | <b>S182</b> |
| 4. | <b>Competitive Surface Plasmon Resonance Studies and Sensorgrams</b>                 | <b>S185</b> |
| 5. | <b>X-Ray crystallographic analysis</b>                                               | <b>S195</b> |

## 1. Materials and methods

All reactions in organic medium were performed in standard oven dried glassware under an inert atmosphere of nitrogen using freshly distilled solvents.  $\text{CH}_2\text{Cl}_2$  was distilled from  $\text{CaH}_2$  and DMF from ninhydrin, and kept over molecular sieves. Solvents and reagents were deoxygenated when necessary by purging with nitrogen. Water used for lyophilization of final dendrimers was nanopure grade, purified through Barnstead NANOPure II Filter with Barnstead MegOhm-CM Sybron meter. All reagents were used as supplied without prior purification unless otherwise stated, and obtained from Sigma-Aldrich Chemical Co. Ltd.

LecA (*Pseudomonas aeruginosa* lectin-I) was purchased from Sigma-Aldrich (L9895-1MG, Lot 051M4011V).

Reactions were monitored by analytical thin-layer chromatography using silica gel 60 F254 precoated plates (E. Merck) and compounds were visualized by 254 nm light, a mixture of Iodine/silica gel and/or mixture of Ceric Ammonium Molybdate solution (100 ml  $\text{H}_2\text{SO}_4$ , 900 ml  $\text{H}_2\text{O}$ , 25g  $(\text{NH}_4)_6\text{Mo}_7\text{O}_{24}\cdot\text{H}_2\text{O}$ , 10g  $\text{Ce}(\text{SO}_4)_2$ ) and subsequent development by gentle warming with a heat-gun. Purifications were performed by flash column chromatography using silica gel from Silicycle (60 Å, 40-63  $\mu\text{m}$ ) with the indicated eluent.

$^1\text{H}$  NMR and  $^{13}\text{C}$  NMR spectra were recorded at 300 or 600 MHz and 75 or 150 MHz, respectively, on a Bruker spectrometer (300 MHz) and Varian spectrometer (600 MHz). All NMR spectra were measured at 25°C in indicated deuterated solvents. Proton and carbon chemical shifts ( $\delta$ ) are reported in ppm and coupling constants (J) are reported in Hertz (Hz). The resonance multiplicities in the  $^1\text{H}$  NMR spectra are described as “s” (singlet), “d” (doublet), “t” (triplet), “quint” (quintuplet) and “m” (multiplet) and broad resonances are indicated by “br”. Residual protic solvent of  $\text{CDCl}_3$  ( $^1\text{H}$ ,  $\delta$  7.27 ppm;  $^{13}\text{C}$ ,  $\delta$  77.0 ppm (central resonance of the triplet)),  $\text{D}_2\text{O}$  ( $^1\text{H}$ ,  $\delta$  4.79 ppm and 30.9 ppm for  $\text{CH}_3$  of Acetone for  $^{13}\text{C}$  spectra of de-O-acetylated compounds), MeOD ( $^1\text{H}$ ,  $\delta$  3.31 ppm and  $^{13}\text{C}$ ,  $\delta$  49.0 ppm. 2D Homonuclear correlation  $^1\text{H}$ - $^1\text{H}$  COSY and Heteronuclear correlation  $^1\text{H}$ - $^{13}\text{C}$  HETCOR experiments were used to confirm NMR peak assignments. *Characteristic signals of protected and deprotected peripheric lactosides at the glycodendrimers' periphery were assigned in comparison with corresponding monovalent reference previously described.*<sup>1</sup> 2D Gel Permeation Chromatography (GPC) was performed using THF or  $\text{CHCl}_3/\text{Et}_3\text{N}$  (1%) as the eluent, at 40°C with a 1 mL/min flow rate on a Viscotek VE 2001 GPCmax (SEC System) with Wyatt DSP/Dawn EOS and refractive index RI/LS system as detectors. 2 PLGel mixed B LS (10  $\mu\text{m}$ , 300x7.5 mm) and LS-MALLS detection with performances verified with polystyrene 100 kDa and 2000 kDa were used to determine the number-average molecular weight ( $M_n$ ) and polydispersity index ( $M_w/M_n$ ). Calculations were performed with Zimm Plot (model). Fourier transform infrared (FTIR) spectra were obtained with Thermo-scientific, Nicolet model 6700 equipped with ATR. The absorptions are given in wavenumbers ( $\text{cm}^{-1}$ ). The intensity of the bands is described as s (strong), m (medium) or w (weak). Melting points were measured on a Electrothermal MEL-TEMP apparatus and are uncorrected.

Accurate mass measurements (HRMS) were performed on a LC-MSD-TOF instrument from Agilent Technologies in positive electrospray mode. Low-resolution mass spectra were performed on the same apparatus or on a LCQ

<sup>1</sup> V. Percec *et al.*, *J. Am. Chem. Soc.*, **2013**, *135*, 9055-9077.

Advantage ion trap instrument from Thermo Fisher Scientific in positive electrospray mode (Mass Spectrometry Laboratory (Université de Montréal), or Plateforme analytique pour molécules organiques (Université du Québec à Montréal), Québec, Canada). Either protonated molecular ions  $[M+nH]^{n+}$  or adducts  $[M+nX]^{n+}$  ( $X = Na, K, NH_4$ ) were used for empirical formula confirmation. MALDI-TOF analyses were performed in either reflectron or linear mode on an Ultraflextreme TOF/TOF instrument from Bruker Daltonics. Mass spectra were acquired over the appropriate mass range for every particular sample. Each mass spectrum represents the sum of minimum 1000 laser shots. Samples were solubilized in either dichloromethane or water to an approximate final concentration of 6 mg/mL. Dithranol and DHB at 10 mg/mL in methanol containing 0.1 % TFA were used as matrices while NaTFA at 2 mg/mL in methanol was used as ionizing agent. A mixture of 20  $\mu$ L matrix, 20  $\mu$ L sample and 10  $\mu$ L ionizing agent was prepared in a 600  $\mu$ L Eppendorf tube. Aliquots of 1  $\mu$ L of the above solution were applied on the MALDI plate and allowed to dry. All solvents for Mass Analyses (Water, Dichlorometane, Methanol and Acetonitrile) were HPLC grade, from de J.T. Baker (Phillipsburg, NJ). Sodium trifluoroacetate (NaTFA), dithranol and trifluoroacetic (TFA) acid were from Sigma (St Louis, MO) while DHB was from Bruker Daltonics (Billerica, MA).

## 2. Synthetic protocols, Characterization, NMR, IR spectra, Mass, GPC, DLS traces

### Hexapropargylated cyclotriphosphazene **1**

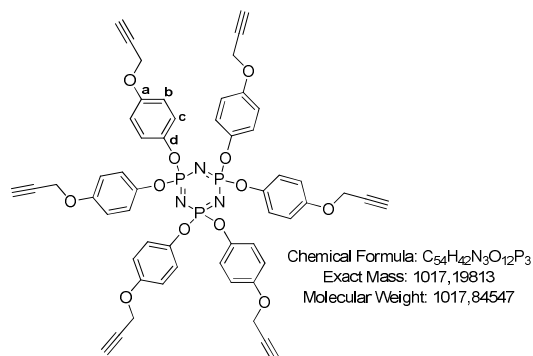

Hexachlorophosphazene N<sub>3</sub>P<sub>3</sub>Cl<sub>6</sub> (freshly recrystallized from Hexanes, 29.3 mg, 84.4 μmol, 1.0 eq.) and 4-propargyloxyphenol **4**<sup>2</sup> (150.0 mg, 1.010 mmol, 12.0 eq.) were dissolved in 4 mL of anhydrous THF. Under nitrogen atmosphere, Cs<sub>2</sub>CO<sub>3</sub> (620.0 mg, 1.900 mmol, 22.5 eq.) was added and the mixture was stirred at reflux temperature (66°C) for 18 hours. The solution was filtered and washed with DCM. The filtrate was concentrated under reduced pressure. Column chromatography on silica (EtOAc/Hexanes 10:90 to 70:30) afforded the desired compound **1** (71.1 mg, 69.9 μmol, **83%**) as a white solid.

**Crystallization conditions:** 130 mg of amorphous **1** (white solid) are dissolved in a Et<sub>2</sub>O/EtOH<sub>abs.</sub> mixture (5 mL/1.5 mL) at room temperature and 6 mL of Hexanes are added. The mixture containing the resulting white precipitate was refluxing at 75°C for 30 minutes (total dissolution was observed at 65°C). After gentle cooling, colorless plates were obtained at room temperature.

R<sub>f</sub> = 0.23, EtOAc/Hexanes 35:65.

m.p. = 64°C (recryst. from Et<sub>2</sub>O/EtOH<sub>abs.</sub>/Hexanes (5:1.5:6)).

<sup>1</sup>H NMR (300 MHz, CDCl<sub>3</sub>, δ ppm): 6.81 (dd, 24H, J = 9.0 Hz, CH<sub>b</sub>, CH<sub>c</sub>), 4.65 (d, 12H, J = 2.4 Hz; OCH<sub>2</sub>C≡CH), 2.54 (t, 6H, J = 2.4 Hz; OCH<sub>2</sub>C≡CH).

<sup>13</sup>C NMR (75 MHz, CDCl<sub>3</sub>, δ ppm): 154.5 (C<sub>a</sub>), 144.8 (C<sub>d</sub>), 121.8 (C<sub>c</sub>), 115.5 (C<sub>b</sub>), 78.5 (C≡CH), 75.7 (C≡CH), 56.1 (OCH<sub>2</sub>).

<sup>31</sup>P NMR (122 MHz, CDCl<sub>3</sub>, δ ppm): 9.9 (s, 3P).

m/z (MALDI-MS) for C<sub>54</sub>H<sub>42</sub>N<sub>3</sub>O<sub>12</sub>P<sub>3</sub> = 1017.9; found 1017.2

(ESI<sup>+</sup>-HRMS) 1018.20541 [M+H]<sup>+</sup>; found 1018.20476; 1040.18735 [M+Na]<sup>+</sup>; found 1040.18735.

<sup>2</sup> M. Srinivasan, S. Sankararaman, H. Hopf, I. Dix and P.G. Jones, *J. Org. Chem.*, 2001, **66**, 4299–4303.

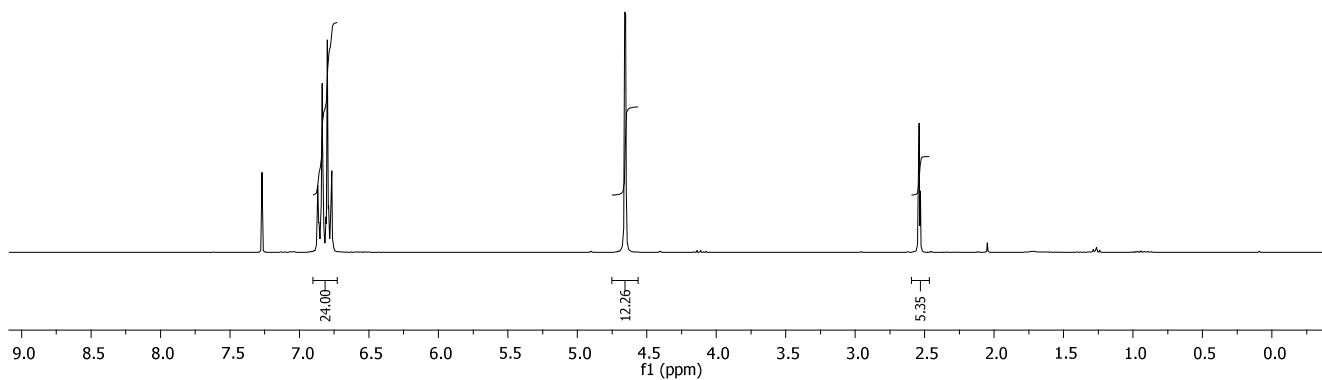

**Figure S1.**  $^1\text{H}$  NMR spectrum of compound **1** ( $\text{CDCl}_3$ , 300MHz)

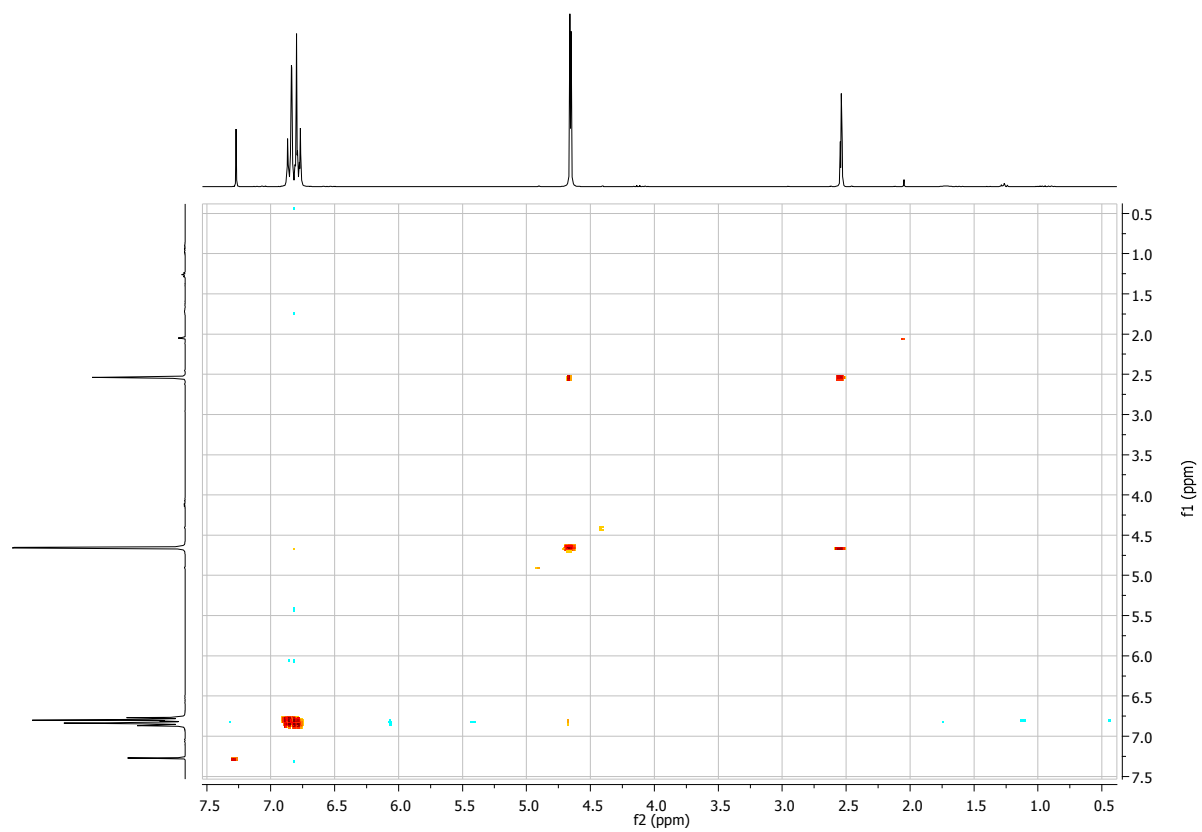

**Figure S2.** gCOSY spectrum of compound **1**

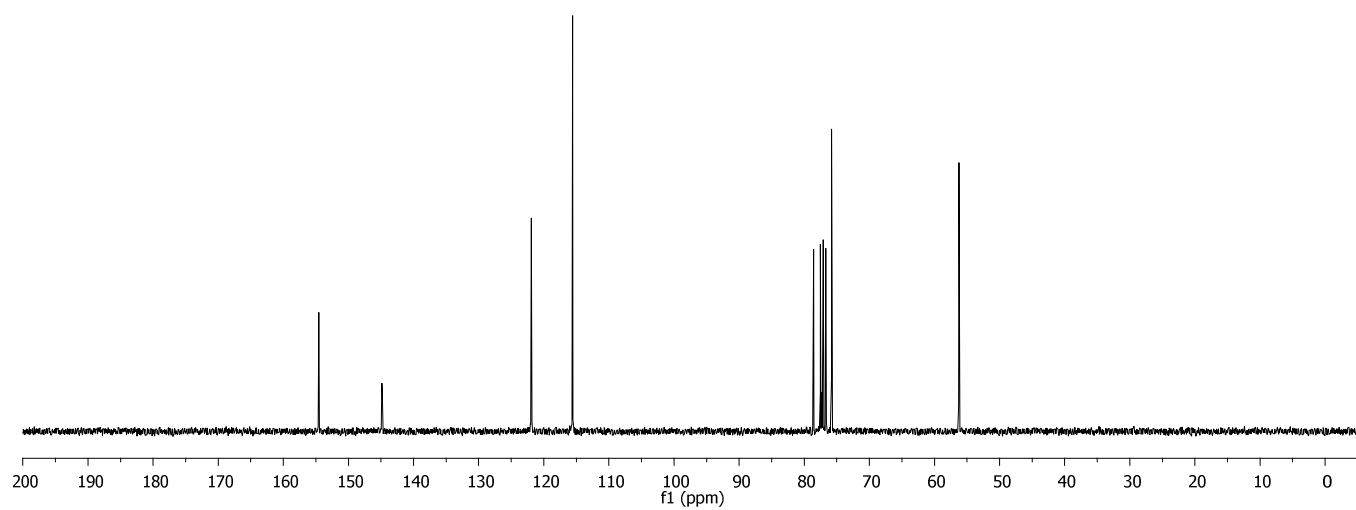

**Figure S3.**  $^{13}\text{C}$  NMR spectrum of compound **1** ( $\text{CDCl}_3$ , 75MHz)

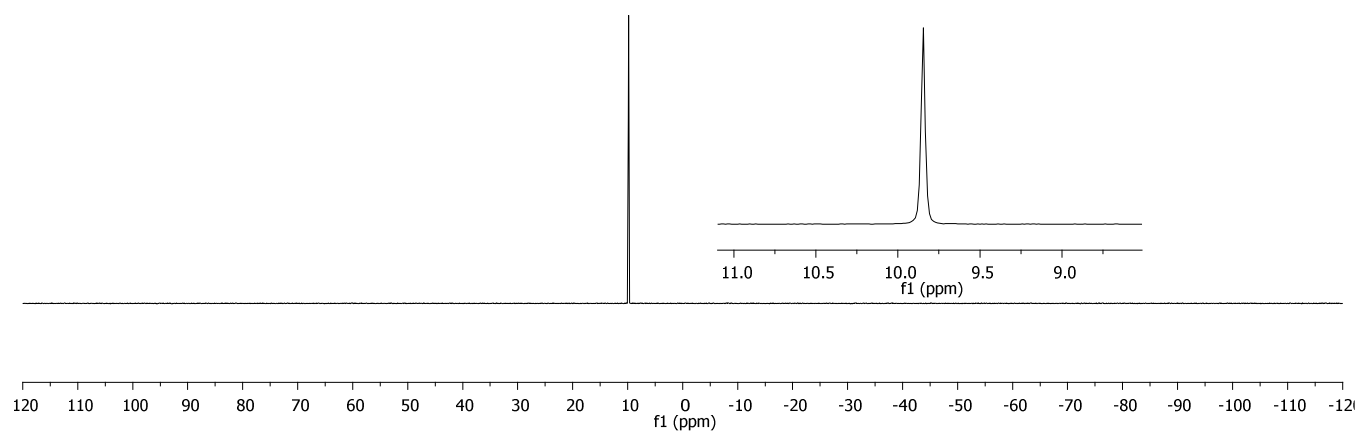

**Figure S4.**  $^{31}\text{P}$  NMR spectrum of compound **1** ( $\text{CDCl}_3$ , 122MHz)

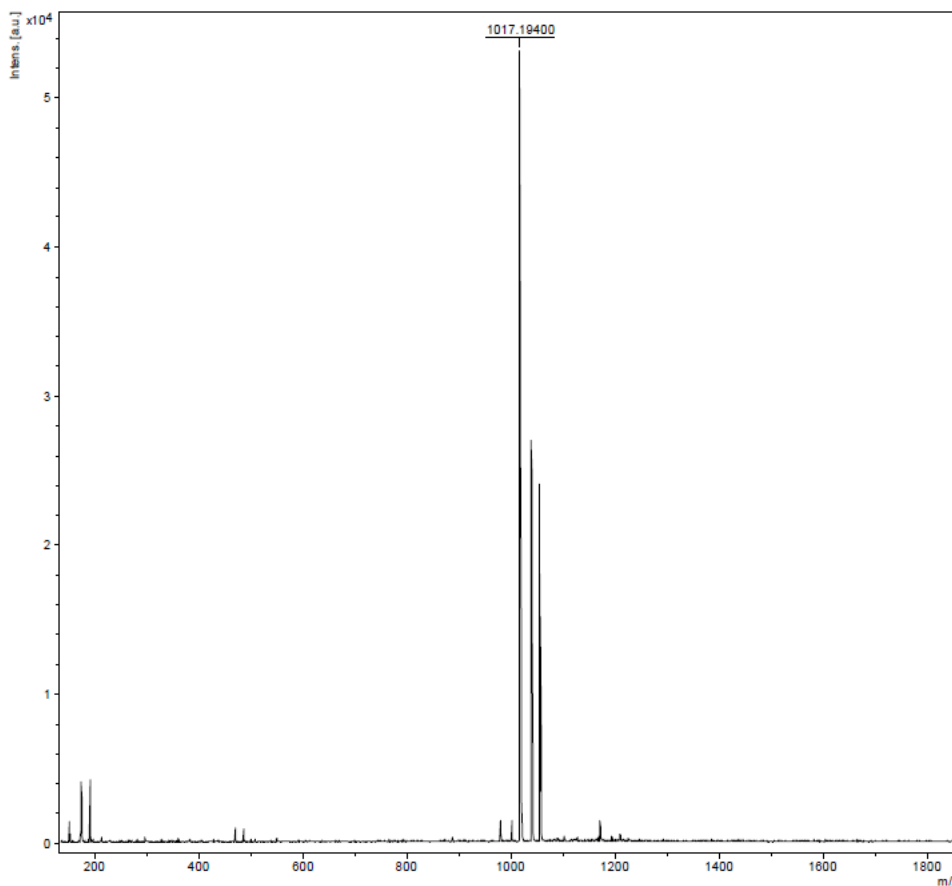

MS Zoomed Spectrum

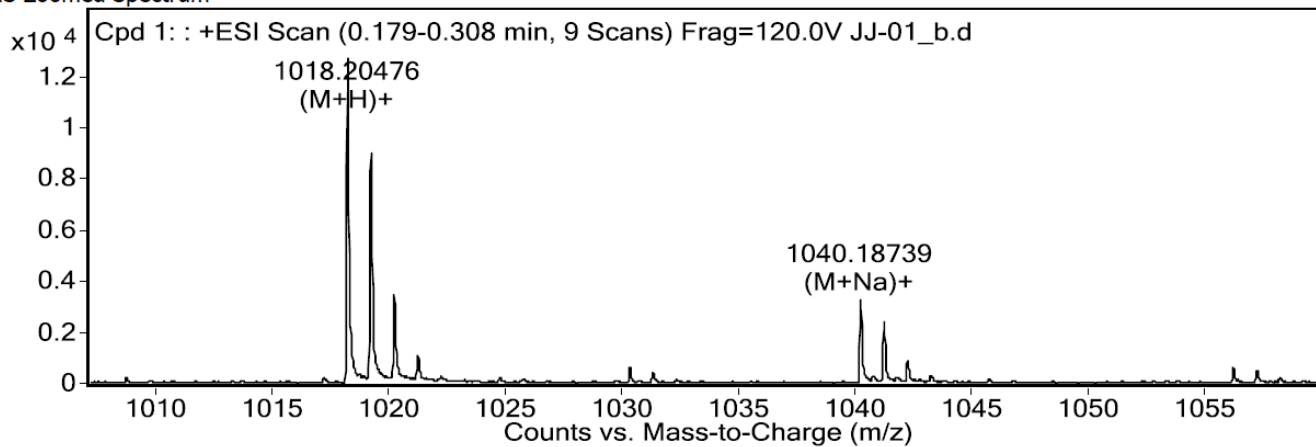

**MS Spectrum Peak List**

| Ion                 | Ion Formula                                                                     | Abund | Expe. m/z  | Calc. m/z  | Diff(ppm) |
|---------------------|---------------------------------------------------------------------------------|-------|------------|------------|-----------|
| (M+H) <sup>+</sup>  | C <sub>54</sub> H <sub>43</sub> N <sub>3</sub> O <sub>12</sub> P <sub>3</sub>   | 12710 | 1018.20476 | 1018.20541 | -0.64     |
| (M+Na) <sup>+</sup> | C <sub>54</sub> H <sub>42</sub> N <sub>3</sub> NaO <sub>12</sub> P <sub>3</sub> | 3279  | 1040.18739 | 1040.18735 | 0.03      |

**Figure S5.** Mass spectrometry of compound 1 (*up*: MALDI-TOF MS and *bottom*: ESI<sup>+</sup>-HRMS)

### Compound 3

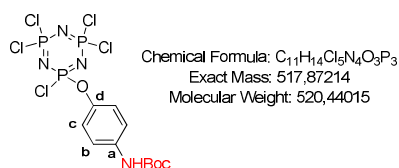

Hexachlorophosphazene (freshly recrystallized from Hexanes, 1.200 g, 3.450 mmol, 2.0 eq.) and *N*Boc-protected *p*-aminophenol derivative **2**<sup>3</sup> (361.0 mg, 1.725 mmol, 1.0 eq.) were dissolved in 125 mL of anhydrous THF. Under nitrogen atmosphere,  $CS_2CO_3$  (2.810 g, 8.630 mmol, 5.0 eq.) was added and the mixture was stirred at reflux temperature (66°C) for 24 hours. The solution was filtered and washed with DCM. The filtrate was concentrated under reduced pressure. Column chromatography on silica (DCM/Hexanes 10:90 to 70:30) afforded the desired compound **3** (538.0 mg, 1.034 mmol, **60%**) as a colorless oil.

$R_f$  = 0.61, EtOAc/Hexanes 20:80.

<sup>1</sup>H NMR (300 MHz,  $CDCl_3$ ,  $\delta$  ppm): 7.40 (d, 2H,  $J$  = 9.0 Hz,  $CH_b$ ), 7.18 (d, 2H,  $J$  = 9.0 Hz,  $CH_c$ ), 6.62 (br s, 1H, NH), 1.52 (s, 9H,  $CH_3$ ).

<sup>13</sup>C NMR (75 MHz,  $CDCl_3$ ,  $\delta$  ppm): 152.5 (C=O), 144.4 ( $C_d$ , d,  $J_{P-C}$  = 10.4 Hz), 137.0 ( $C_a$ , d,  $J_{P-C}$  = 2.7 Hz), 121.8 ( $C_b$ , d,  $J_{P-C}$  = 5.0 Hz), 119.5 ( $C_c$ ), 80.9 ( $C_q$ ), 28.3 ( $CH_3$ ).

<sup>31</sup>P NMR (122 MHz,  $CDCl_3$ ,  $\delta$  ppm): 22.4 (d, 2P,  $^2J(P,P)$  = 59.3 Hz,  $PCl_2$ ), 12.8 (t, 1P,  $^2J(P,P)$  = 59.3 Hz, Cl-P-O).

$m/z$  (ESI<sup>+</sup>-HRMS) for  $C_{11}H_{14}Cl_6N_4O_3P_3$  = 540.8614 [ $M+Na$ ]<sup>+</sup>; found 540.8628.

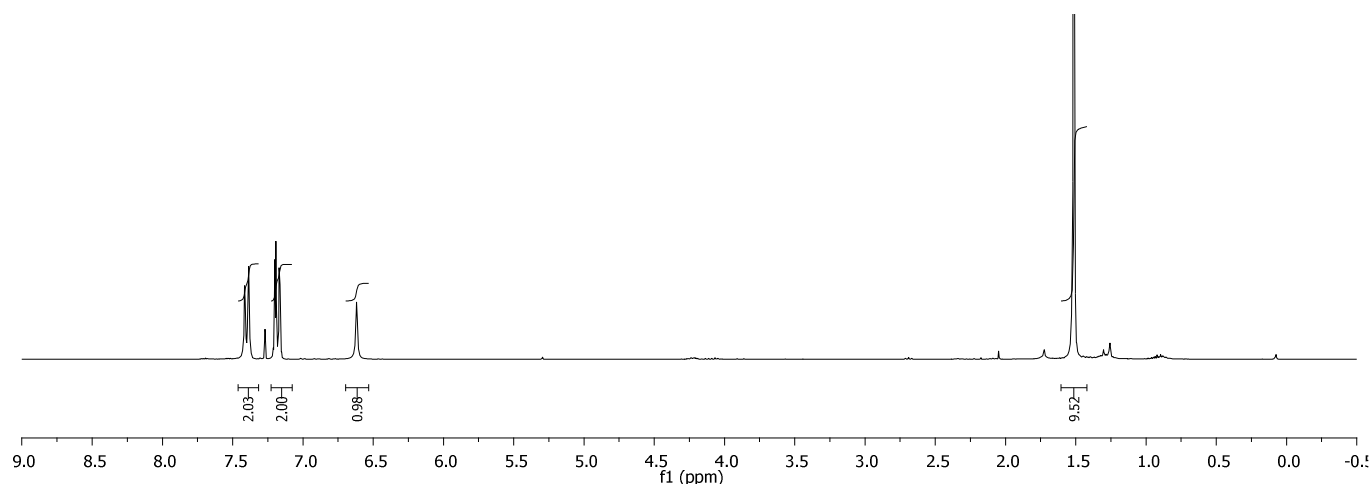

Figure S6. <sup>1</sup>H NMR spectrum of compound **3** ( $CDCl_3$ , 300MHz)

<sup>3</sup> N. Jain, Y. Arntz, V. Goldschmidt, G. Duportail, Y. Mely and A. S. Klymchenko, *Bioconjugate Chem.*, 2010, **21**, 2110–2118.



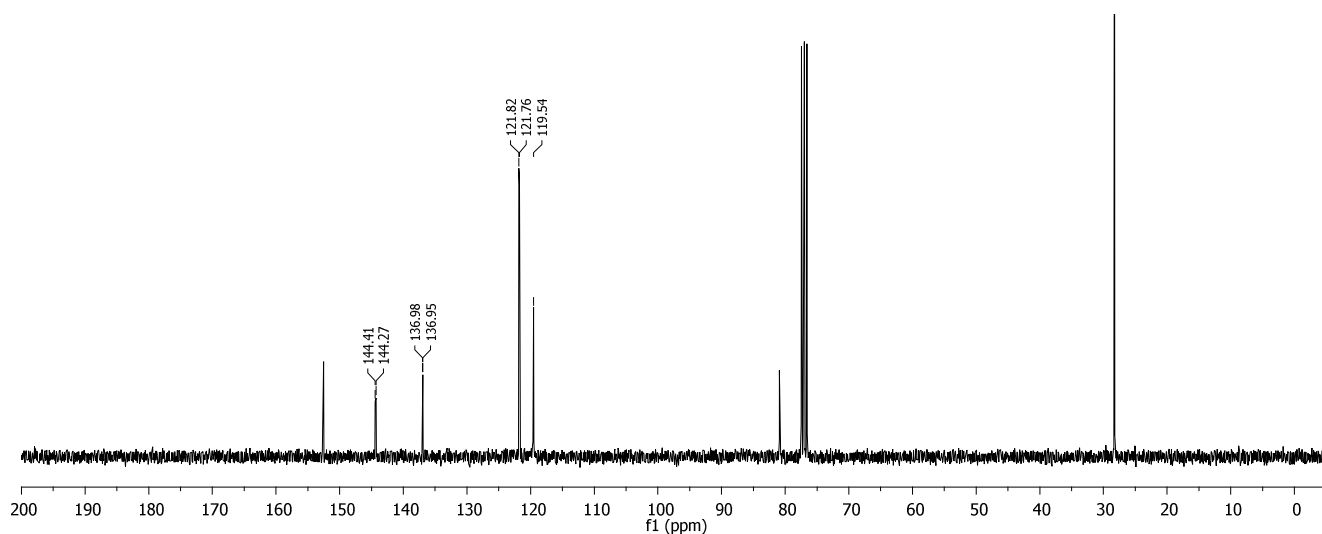

Figure S7.  $^{13}\text{C}$  NMR spectrum of compound **3** ( $\text{CDCl}_3$ , 75MHz)

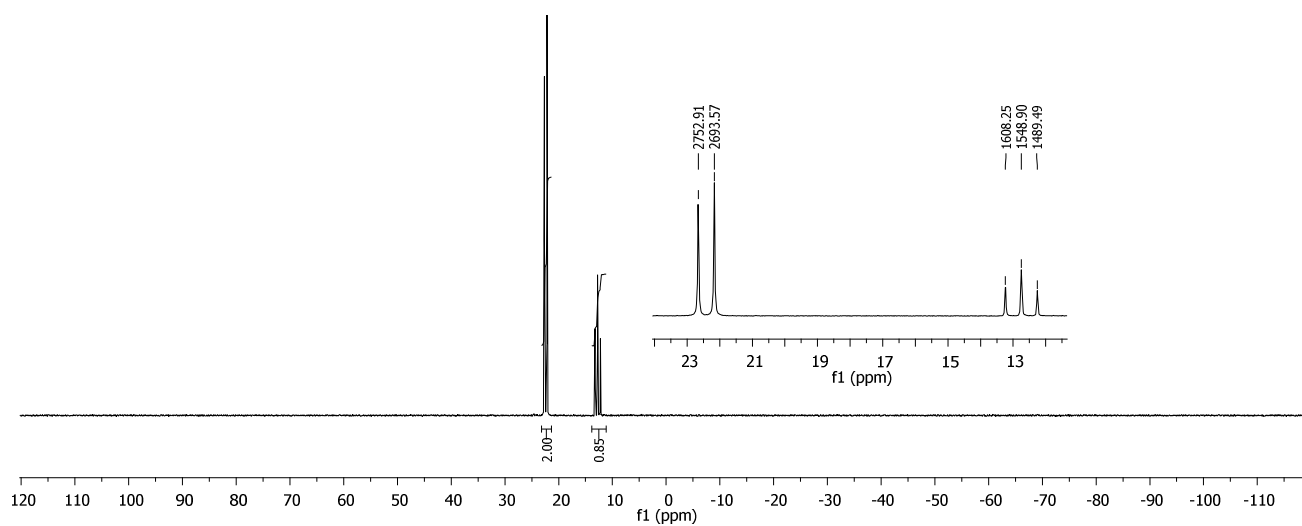

Figure S8.  $^{31}\text{P}$  NMR spectrum of compound **3** ( $\text{CDCl}_3$ , 75MHz)

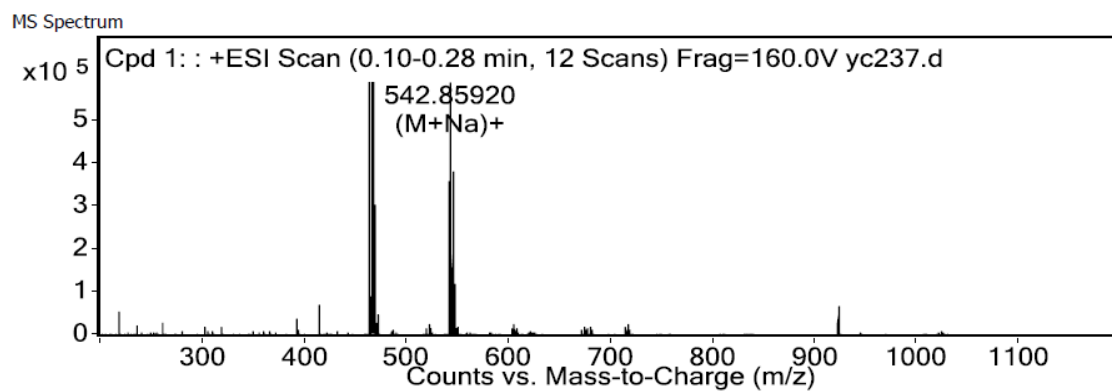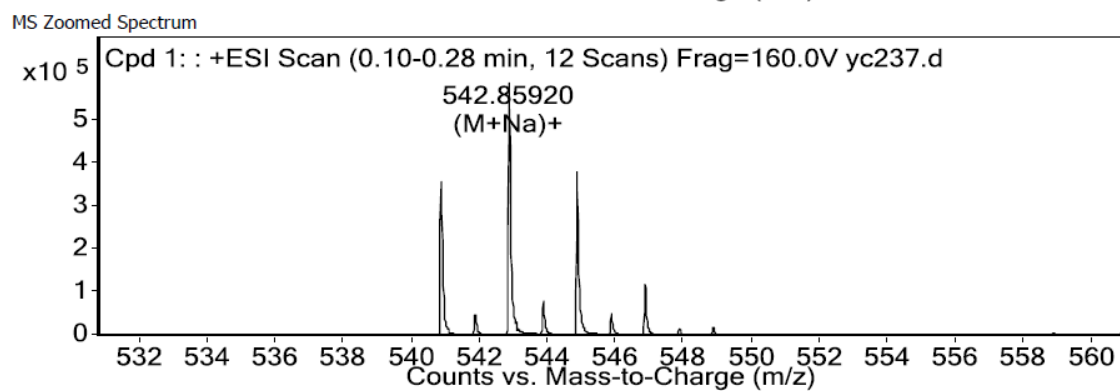

**MS Spectrum Peak List**

| Ion     | Ion Formula                                                                                    | Abund    | Expe. m/z | Calc. m/z | Diff(ppm) |
|---------|------------------------------------------------------------------------------------------------|----------|-----------|-----------|-----------|
| (M+Na)+ | C <sub>11</sub> H <sub>14</sub> Cl <sub>5</sub> N <sub>4</sub> NaO <sub>3</sub> P <sub>3</sub> | 366441.2 | 540.86277 | 540.86136 | 2.61      |

**Figure S9.** ESI<sup>+</sup>-HRMS spectrum of compound **3**

## Compound 5

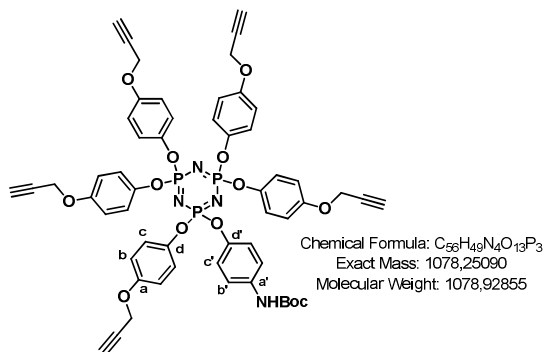

Monofunctionalized derivative **3** (50.0 mg, 0.0961 mmol, 1.0 eq.) and 4-propargyloxyphenol **4** (113.9 mg, 0.7690 mmol, 8.0 eq.) were dissolved in 8 mL of anhydrous THF. Under nitrogen atmosphere, Cs<sub>2</sub>CO<sub>3</sub> (1.50 g, 4.81 mmol, 48.0 eq.) was added and the mixture was stirred at reflux temperature (66°C) for 6 hours. The solution was filtered and washed with DCM. The filtrate was concentrated under reduced pressure. Column chromatography on silica (EtOAc/Hexanes 10:90 to 35:65) afforded the desired compound **5** (88.0 mg, 0.0816 mmol, **87%**) as a colorless oil.

R<sub>f</sub> = 0.36, EtOAc/Hexanes 35:65.

<sup>1</sup>H NMR (300 MHz, CDCl<sub>3</sub>, δ ppm): 7.18 (d, 2H, *J* = 9.0 Hz, CH<sub>b</sub>), 6.87-6.76 (m, 22H, CH<sub>b</sub>, CH<sub>c</sub>, CH<sub>c</sub>), 6.54 (br s, 1H, NH), 4.65 (t<sub>app</sub>, 10H, OCH<sub>2</sub>C≡CH), 2.55 (t<sub>app</sub>, 5H, C≡CH), 1.52 (s, 9H, CH<sub>3</sub>).

<sup>13</sup>C NMR (75 MHz, CDCl<sub>3</sub>, δ ppm): 154.4 (C<sub>a</sub>), 152.6 (C=O), 145.8 (C<sub>d'</sub>), 144.7 (C<sub>d</sub>), 135.1 (C<sub>a'</sub>), 121.8 (C<sub>c</sub>), 121.3 (C<sub>b'</sub>), 119.5 (C<sub>c</sub>), 115.4 (C<sub>b</sub>), 80.5 (C<sub>q</sub>), 78.5 (C≡CH), 78.4 (C≡CH), 75.7 (C≡CH), 56.1 (OCH<sub>2</sub>), 28.3 (CH<sub>3</sub>).

<sup>31</sup>P NMR (122 MHz, CDCl<sub>3</sub>, δ ppm): 9.81 (s<sub>app</sub>, 3P).

*m/z* (ESI<sup>+</sup>-HRMS) for C<sub>56</sub>H<sub>49</sub>N<sub>4</sub>O<sub>13</sub>P<sub>3</sub> = 1079.2582 [*M*+H]<sup>+</sup>; found 1079.2556.

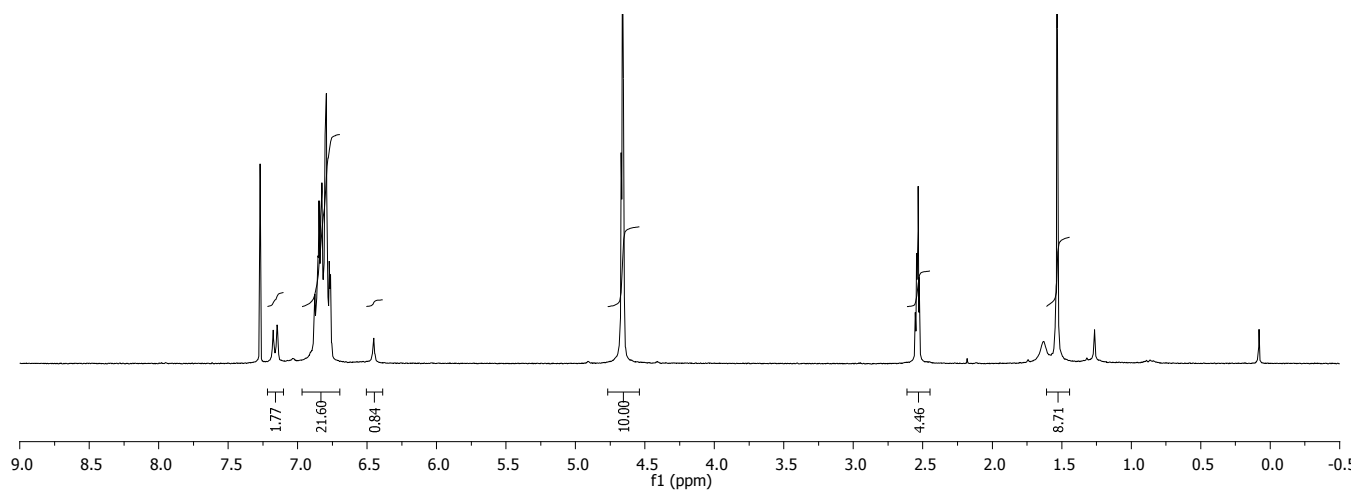

**Figure S10.**  $^1\text{H}$  NMR spectrum of compound **5** ( $\text{CDCl}_3$ , 300MHz)

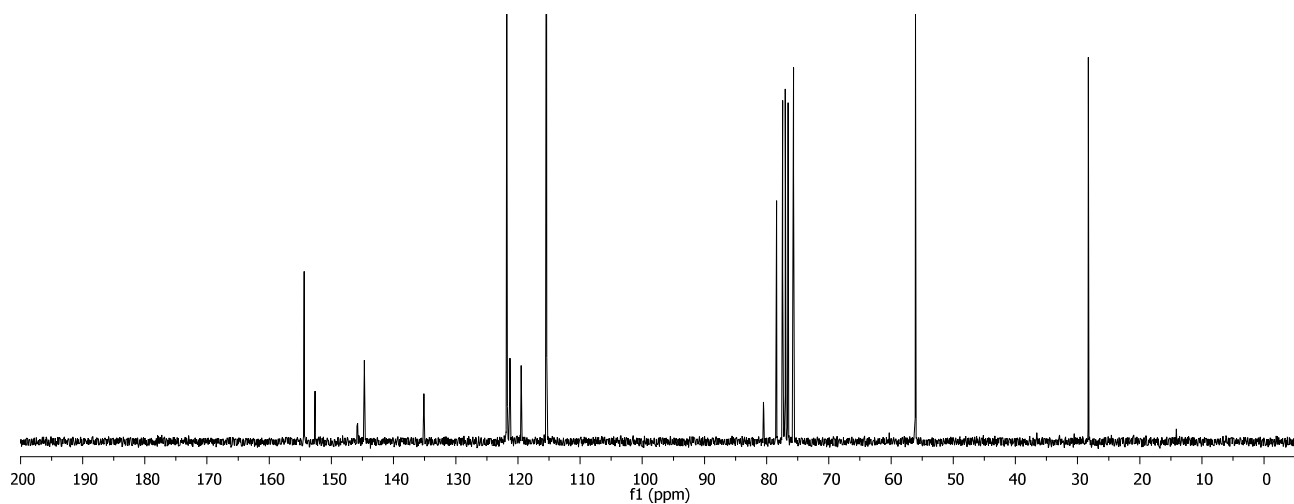

**Figure S11.**  $^{13}\text{C}$  NMR spectrum of compound **5** ( $\text{CDCl}_3$ , 75MHz)

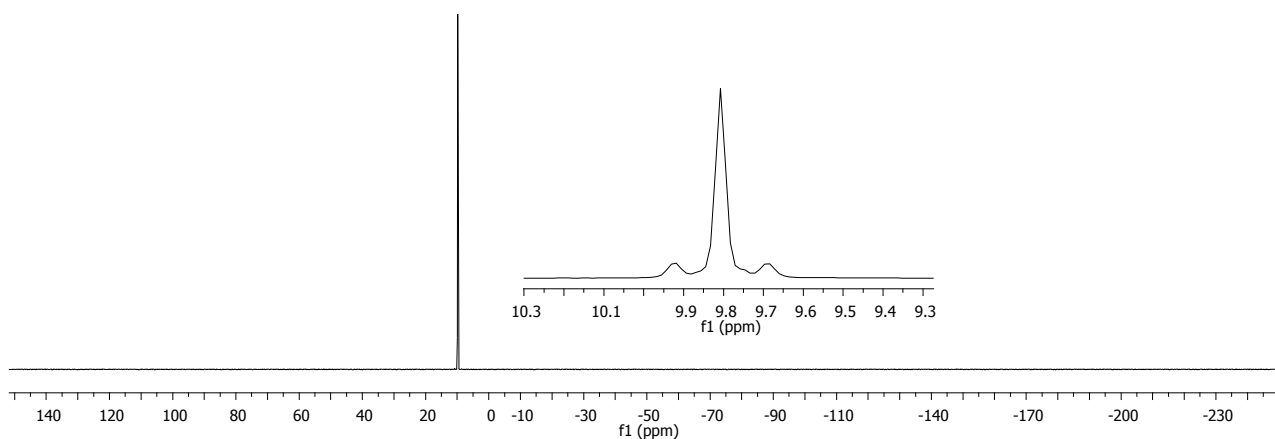

**Figure S12.**  $^{31}\text{P}$  NMR spectrum of compound **5** ( $\text{CDCl}_3$ , 122MHz)

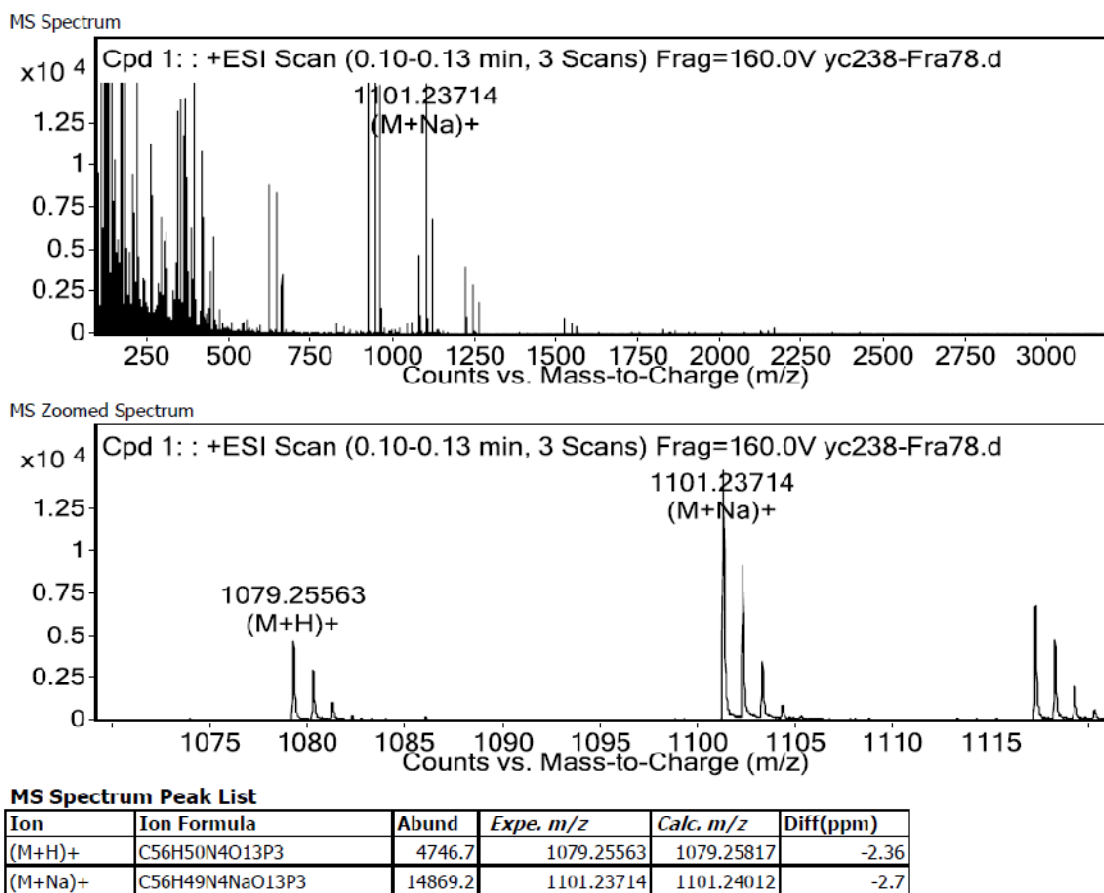

Figure S13. ESI<sup>+</sup>-HRMS spectrum of compound 5

## Compound 6

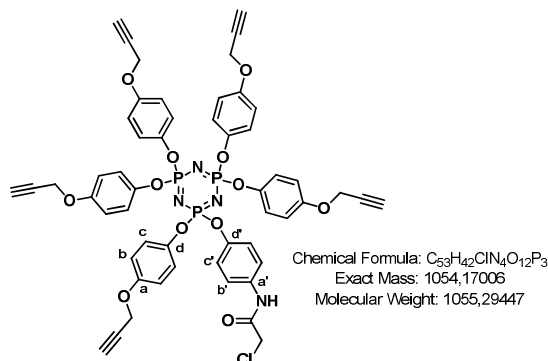

Dissymmetric hexasubstituted protected phosphazene derivative **5** (158.0 mg, 0.1460 mmol, 1.0 eq.) was dissolved in 3.5 mL of anhydrous DCM under nitrogen atmosphere and at 0°C was added dropwise 550 μL of trifluoroacetic acid (TFA) over a 30 minutes period. After stirring 3 hours at rt, the solvent was removed under reduced pressure and coevaporated with toluene. The residue was dissolved in 3 mL of anhydrous DCM and, under nitrogen atmosphere, was added 100 μL of DIPEA (74.7 mg, 0.578 mmol, 4.0 eq.). At 0°C was added dropwise chloroacetylchloride\* (34.5 μL, 49.0 mg, 0.433 mmol, 3.0 eq.) in 1 mL of anhydrous DCM over a 15 minutes period. After stirring at rt for 18 hours, the solvent was removed under reduced pressure and the residue was dissolved in 25 mL of EtOAc and washed with HCl 1M (2×20 mL), NH<sub>4</sub>Cl (20 mL), then water (10 mL). The organic phase was dried over Na<sub>2</sub>SO<sub>4</sub>, and concentrated under reduced pressure. Column chromatography on silica (EtOAc/Hexanes 20:80 to 45:55) afforded the desired compound **6** (112.0 mg, 0.1061 mmol, **72%**) as a yellowish oil.

R<sub>f</sub> = 0.39, EtOAc/Hexanes 50:50.

<sup>1</sup>H NMR (300 MHz, CDCl<sub>3</sub>, δ ppm): 8.24 (br s, 1H, NH), 7.33 (d, 2H, J = 9.0 Hz, CH<sub>b</sub>), 6.88-6.76 (m, 22H, CH<sub>b</sub>, CH<sub>c</sub>, CH<sub>c</sub>), 4.65 (t<sub>app</sub>, 10H, OCH<sub>2</sub>C≡CH), 4.19 (s, 2H, CH<sub>2</sub>Cl), 2.55 (t<sub>app</sub>, 5H, C≡CH).

<sup>13</sup>C NMR (75 MHz, CDCl<sub>3</sub>, δ ppm): 163.7 (C=O), 154.4 (C<sub>a</sub>), 147.3 (C<sub>d</sub>), 144.7 (C<sub>d</sub>), 133.4 (C<sub>a</sub>), 121.7 (C<sub>c</sub>), 121.5 (C<sub>b</sub>), 121.2 (C<sub>c</sub>), 115.4 (C<sub>b</sub>), 78.5 (C≡CH), 78.4 (C≡CH), 75.7 (C≡CH), 56.1 (OCH<sub>2</sub>), 42.8 (CH<sub>2</sub>Cl).

<sup>31</sup>P NMR (122 MHz, CDCl<sub>3</sub>, δ ppm): 9.69 (s<sub>app</sub>, 3P).

m/z (ESI<sup>+</sup>-HRMS) for C<sub>53</sub>H<sub>42</sub>ClN<sub>4</sub>O<sub>12</sub>P<sub>3</sub> = 1055.1773 [M+H]<sup>+</sup>; found 1055.1758.

\* The use of bromoacetylchloride at this step provides a mixture of halogenated (Cl/Br) derivatives after the same steps of purification.

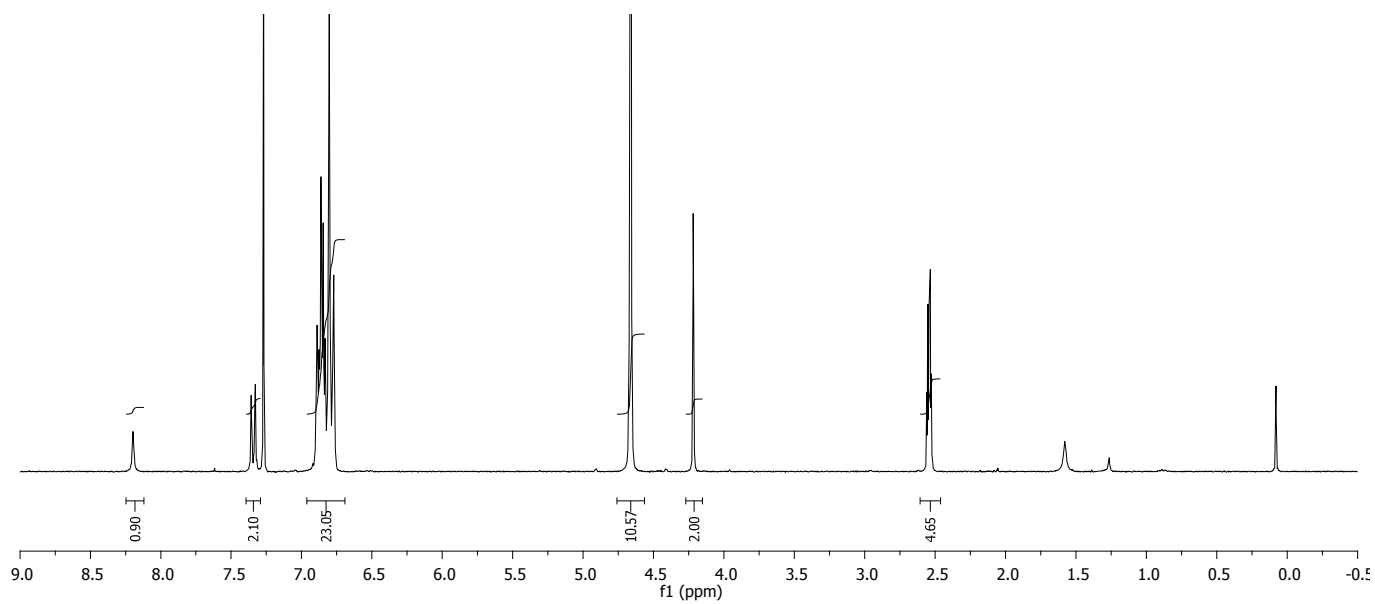

Figure S14.  $^1\text{H}$  NMR spectrum of compound **6** ( $\text{CDCl}_3$ , 300MHz)

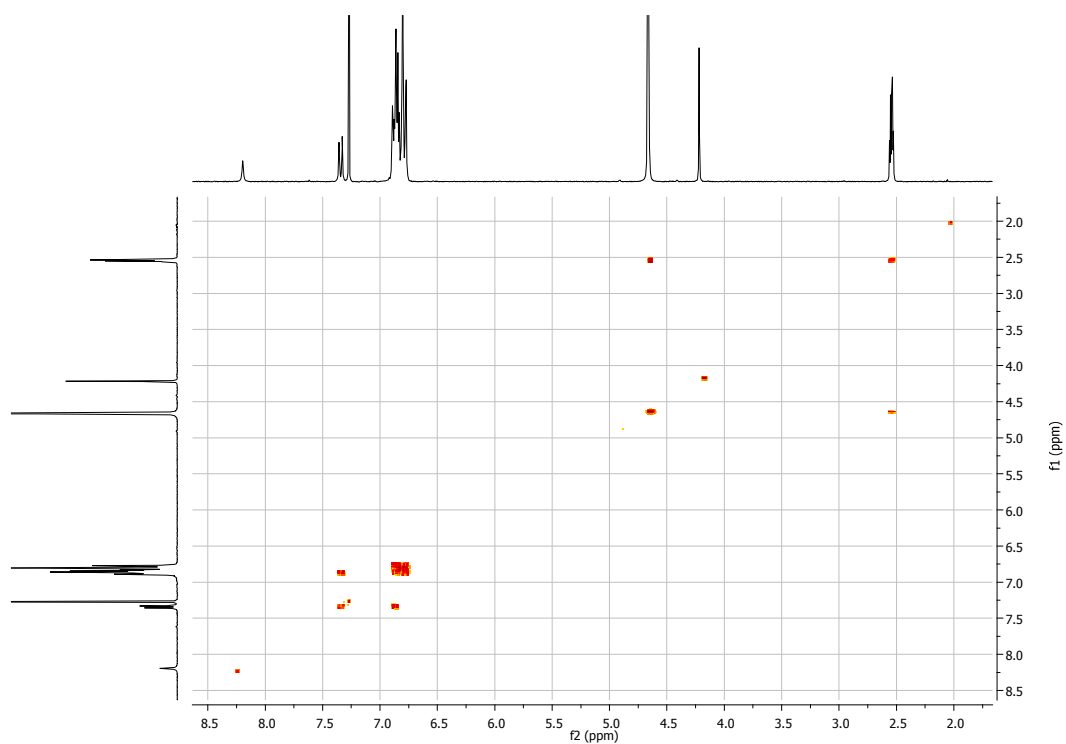

Figure S15. gCOSY spectrum of compound **6**

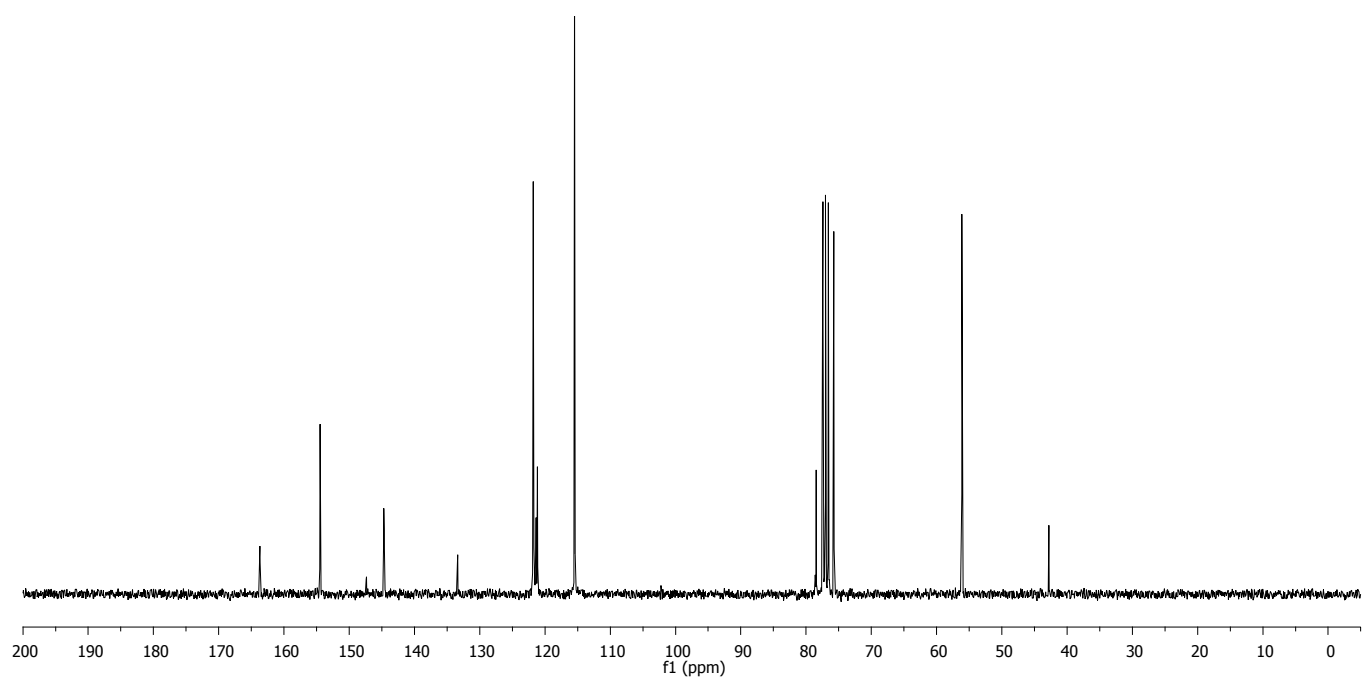

**Figure S16.**  $^{13}\text{C}$  NMR spectrum of compound **6** ( $\text{CDCl}_3$ , 75MHz)

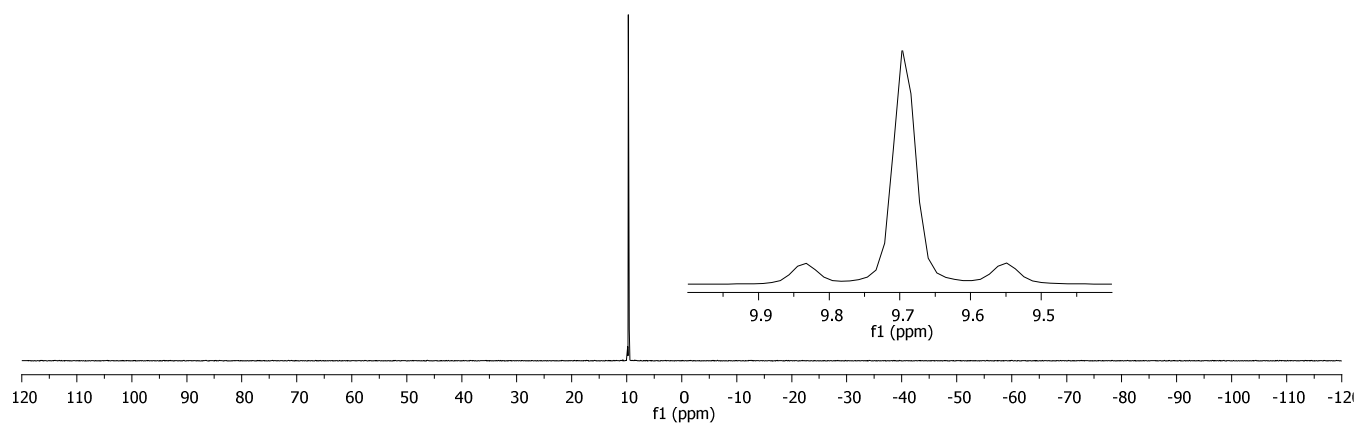

**Figure S17.**  $^{31}\text{P}$  NMR spectrum of compound **6** ( $\text{CDCl}_3$ , 122MHz)



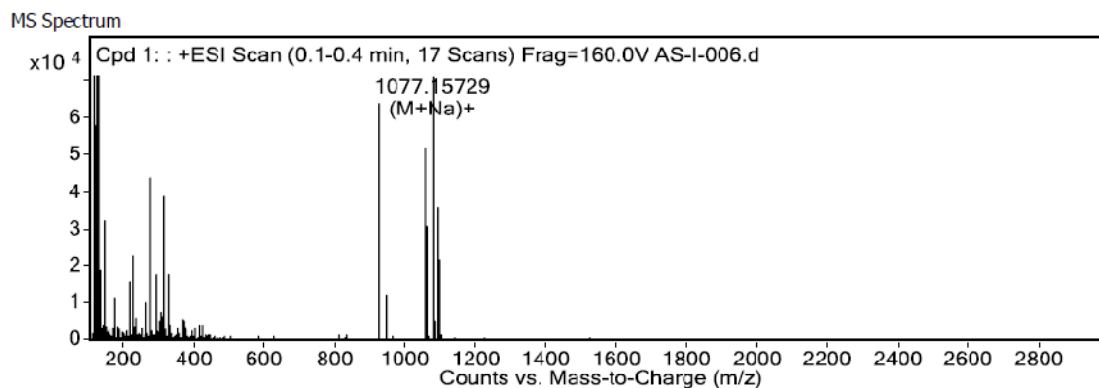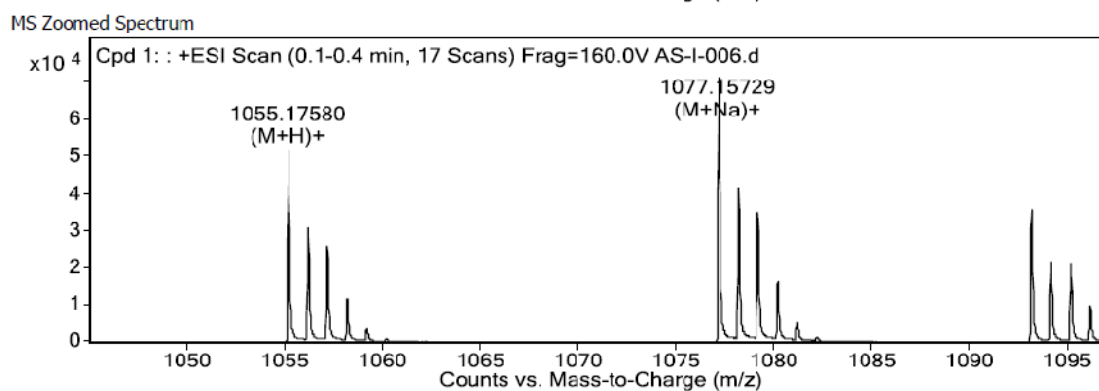

MS Spectrum Peak List

| Ion                 | Ion Formula                                                                       | Abund   | Expe. m/z  | Calc. m/z  | Diff(ppm) |
|---------------------|-----------------------------------------------------------------------------------|---------|------------|------------|-----------|
| (M+H) <sup>+</sup>  | C <sub>53</sub> H <sub>43</sub> CIN <sub>4</sub> O <sub>12</sub> P <sub>3</sub>   | 52261.9 | 1055.1758  | 1055.17734 | -1.46     |
| (M+Na) <sup>+</sup> | C <sub>53</sub> H <sub>42</sub> CIN <sub>4</sub> NaO <sub>12</sub> P <sub>3</sub> | 71751.9 | 1077.15729 | 1077.15928 | -1.85     |

Figure S18. ESI<sup>+</sup>-HRMS spectrum of compound 6

**Mixture Br/Cl (ratio of ~ 20:80) with the use of bromoacetylchloride:**

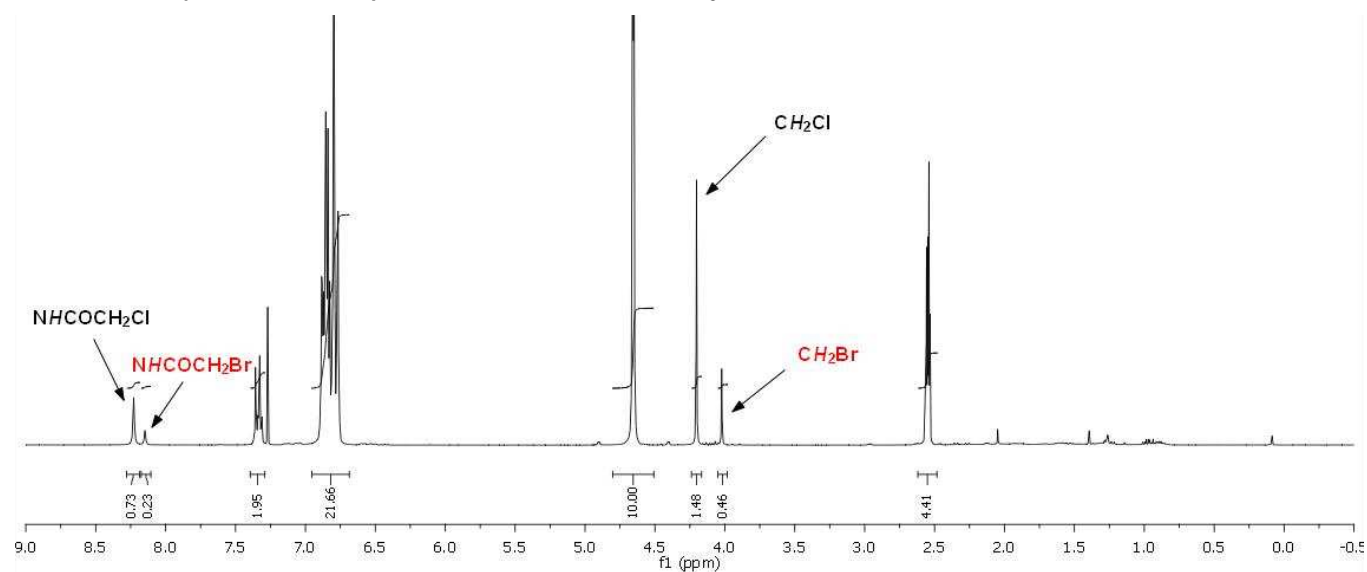

Figure S19. <sup>1</sup>H NMR spectrum of the Cl/Br mixture of compound 6 (CDCl<sub>3</sub>, 300MHz)

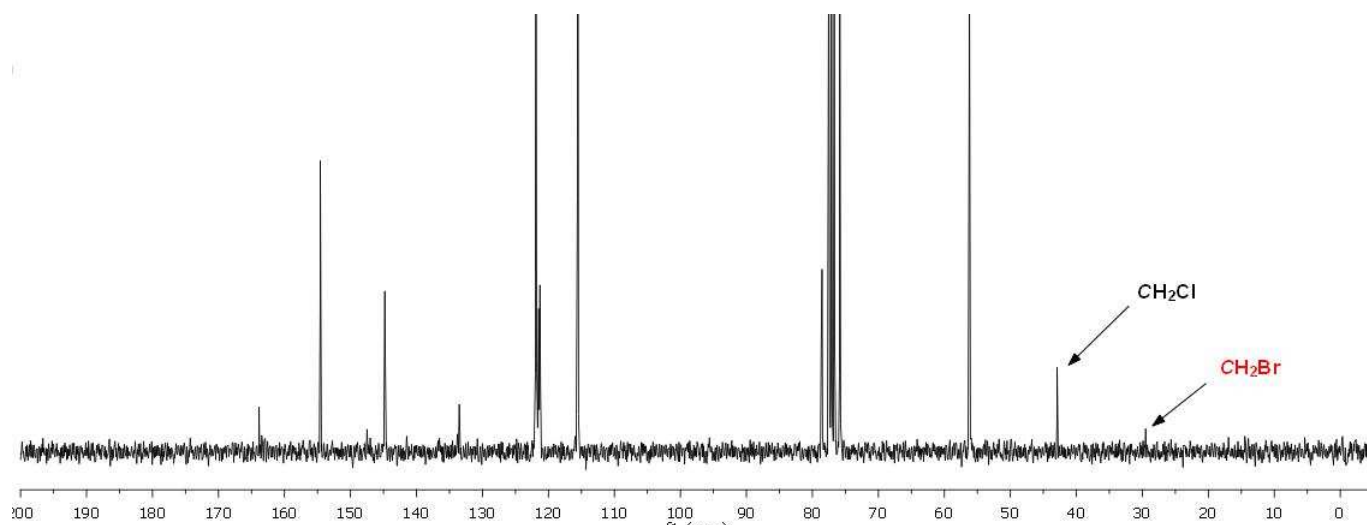

Figure S20.  $^{13}\text{C}$  NMR spectrum of the Cl/Br mixture of compound **6** ( $\text{CDCl}_3$ , 75MHz)

Les calculs sont effectués sur les adduits de sodium,  $[\text{M}+\text{Na}]^+$ , des 2 composés, soit à  $m/z$  1077 pour le produit chloré et à  $m/z$  1121 pour le produit bromé.

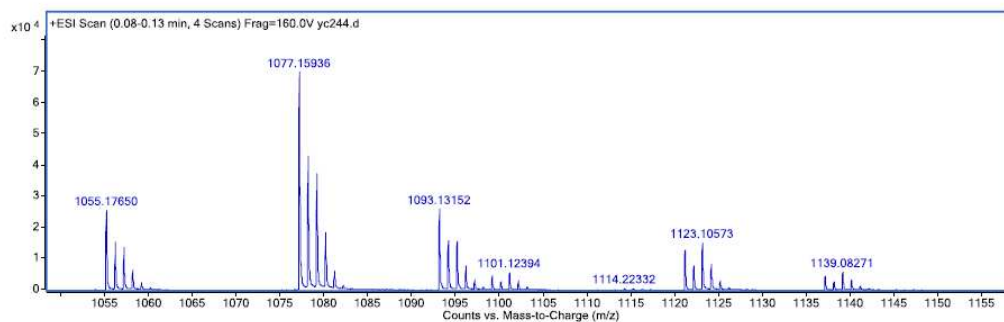

Table 1 – Intensité des 5 premiers pics du produit chloré

| m/z          | Intensité     |
|--------------|---------------|
| 1077.15936   | 70826         |
| 1078.16210   | 43012         |
| 1079.15964   | 37473         |
| 1080.15895   | 18585         |
| 1081.16393   | 6181          |
| <b>somme</b> | <b>176075</b> |

Table 2 – Intensité des 5 premiers pics du produit bromé

| m/z          | Intensité    |
|--------------|--------------|
| 1121.10668   | 13002        |
| 1122.10897   | 8058         |
| 1123.10573   | 15548        |
| 1124.10886   | 8387         |
| 1125.10994   | 2960         |
| <b>somme</b> | <b>47955</b> |

En utilisant la somme des intensités pour les 5 premiers pics de chaque patron isotopique, nous obtenons un ratio de 78.6% de produit chloré pour 21.4% de produit bromé.

Figure S21. Calculation of Cl/Br ratio from  $\text{ESI}^+$ -HRMS of compound **6** when using bromoacetyl chloride as reactant

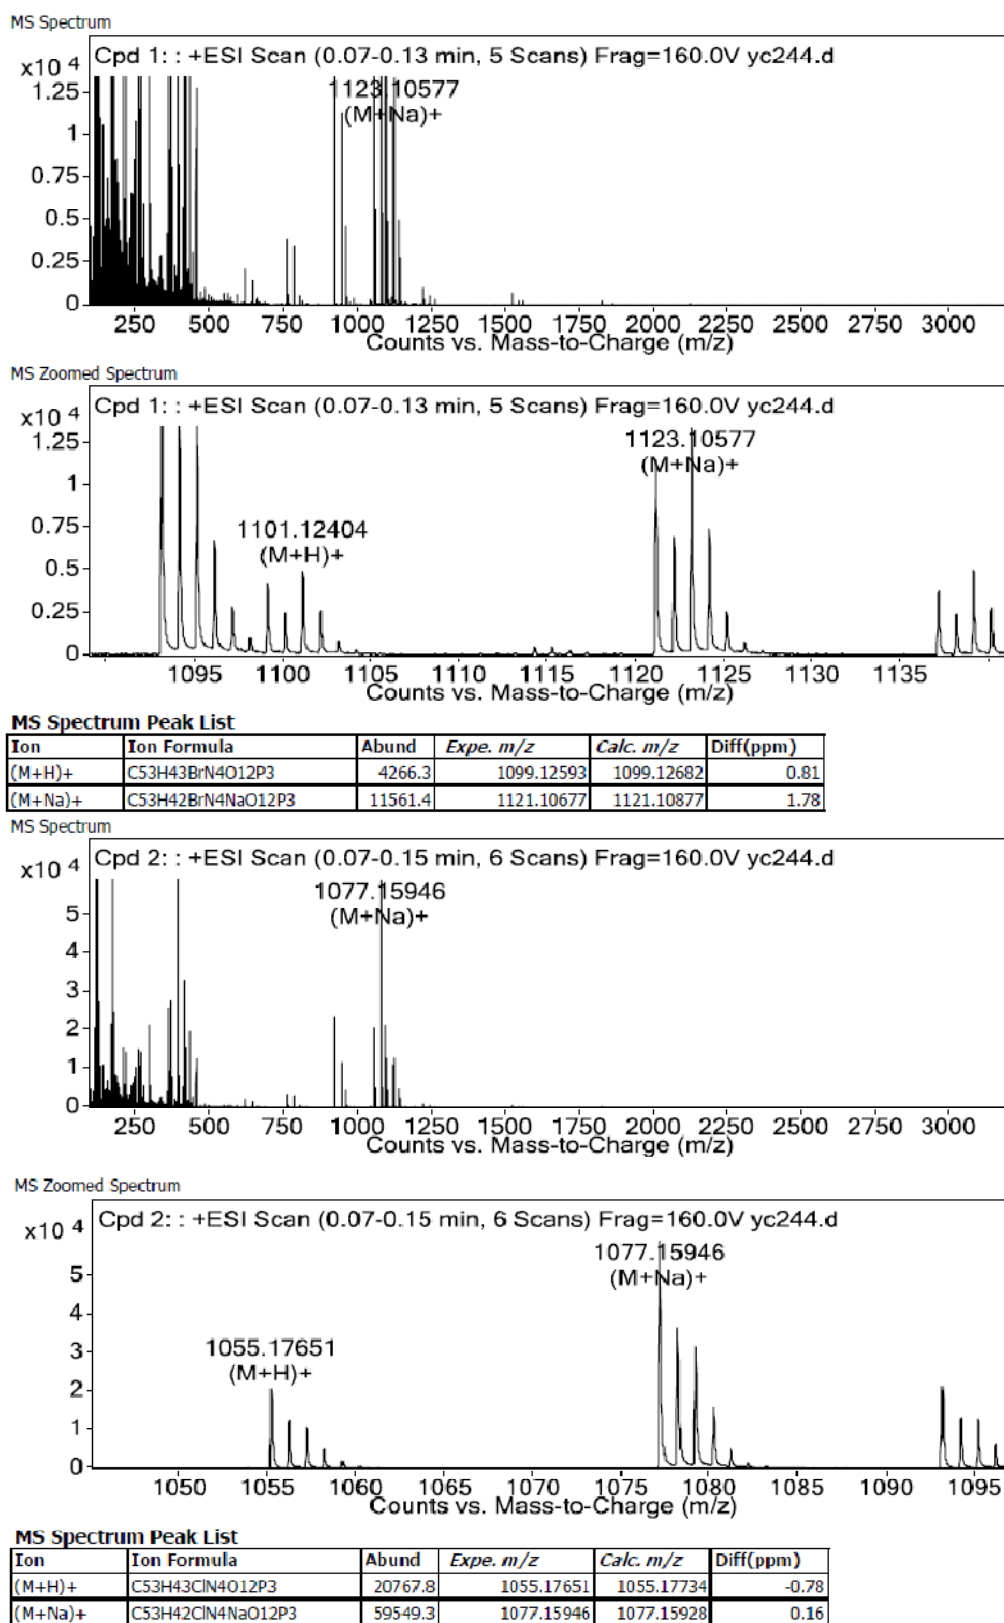

Figure S22. ESI<sup>+</sup>-HRMS spectrum of compound 6 when using bromoacetyl chloride as reactant

## Compound 7

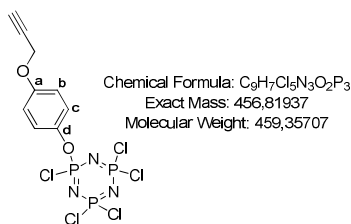

Hexachlorophosphazene (freshly recrystallized from Hexanes, 518.6 mg, 1.490 mmol, 2.0 eq.) and 4-propargyloxyphenol **4** (110.5 mg, 0.745 mmol, 1.0 eq.) were dissolved in 50 mL of anhydrous THF. Under nitrogen atmosphere, Cs<sub>2</sub>CO<sub>3</sub> (2.42 g, 7.44 mmol, 10.0 eq.) was added and the mixture was stirred at reflux temperature (66°C) for 22 hours. The solution was filtered and washed with DCM. The filtrate was concentrated under reduced pressure. Column chromatography on silica (DCM/Hexanes 20:80 to 75:25) afforded the desired compound **7** (243.6 mg, 0.530 mmol, **71%**) as a colorless oil.

R<sub>f</sub> = 0.66, EtOAc/Hexanes 20:80.

<sup>1</sup>H NMR (300 MHz, CDCl<sub>3</sub>, δ ppm): 7.15-7.11 (m, 2H, CH<sub>b</sub>), 6.93-6.89 (m, 2H, CH<sub>c</sub>), 4.61 (d, *J* = 2.4 Hz, 2H, OCH<sub>2</sub>C≡C), 2.46 (t, 1H, *J* = 2.4 Hz, C≡CH).

<sup>13</sup>C NMR (75 MHz, CDCl<sub>3</sub>, δ ppm): 155.8 (C<sub>a</sub>, d, *J*<sub>P-C</sub> = 2.6 Hz), 143.3 (C<sub>d</sub>, d, *J*<sub>P-C</sub> = 10.5 Hz), 122.4 (C<sub>c</sub>, d, *J*<sub>P-C</sub> = 5.0 Hz), 116.0 (C<sub>b</sub>, d, *J*<sub>P-C</sub> = 2.2 Hz), 78.1 (C≡CH), 76.0 (C≡CH), 56.3 (OCH<sub>2</sub>C≡C).

<sup>31</sup>P NMR (122 MHz, CDCl<sub>3</sub>, δ ppm): 22.4 (d, 2P, <sup>2</sup>*J*(P,P) = 59.2 Hz, PCl<sub>2</sub>), 12.9 (t, 1P, <sup>2</sup>*J*(P,P) = 59.3 Hz, Cl-P-O).

*m/z* (ESI<sup>+</sup>-HRMS) for C<sub>9</sub>H<sub>7</sub>Cl<sub>6</sub>N<sub>3</sub>O<sub>2</sub>P<sub>3</sub> = 457.8267 [*M*+H]<sup>+</sup>; found 457.8280, 479.8086 [*M*+Na]<sup>+</sup>, found 479.8093.

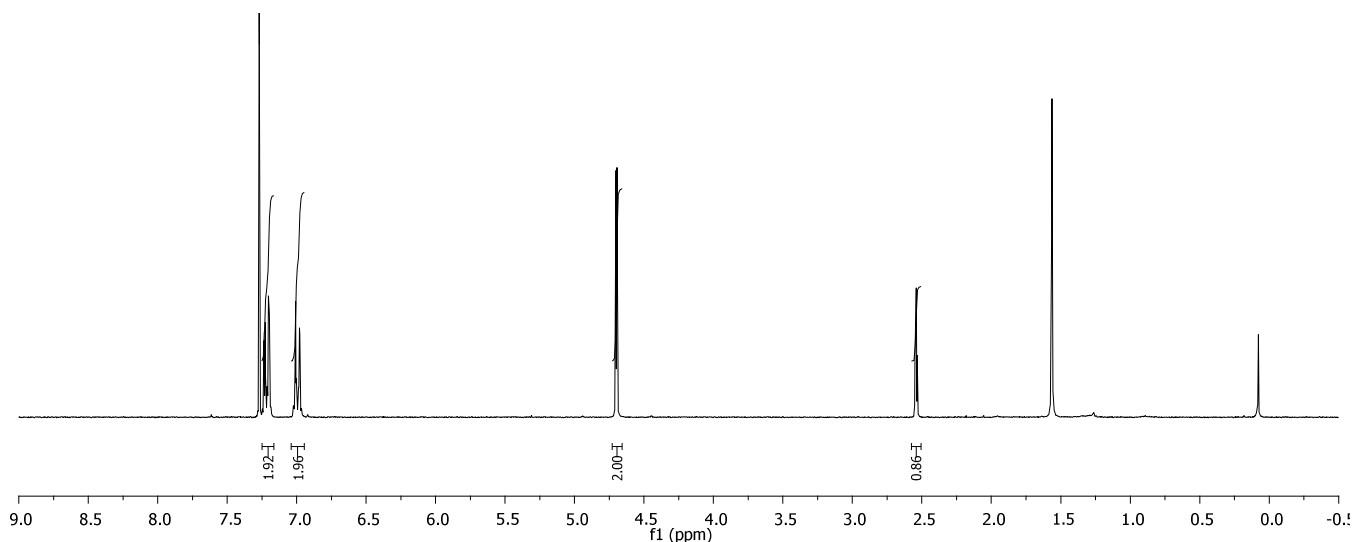

Figure S23. <sup>1</sup>H NMR spectrum of compound **7** (CDCl<sub>3</sub>, 300MHz)

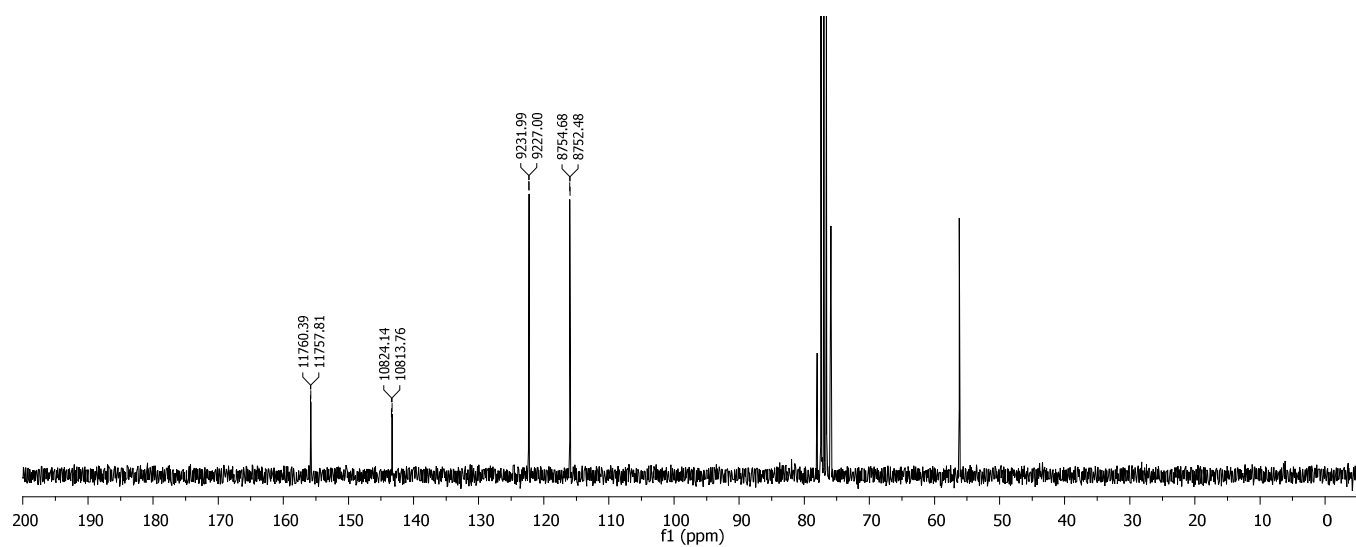

Figure S24.  $^{13}\text{C}$  NMR spectrum of compound 7 ( $\text{CDCl}_3$ , 75MHz)

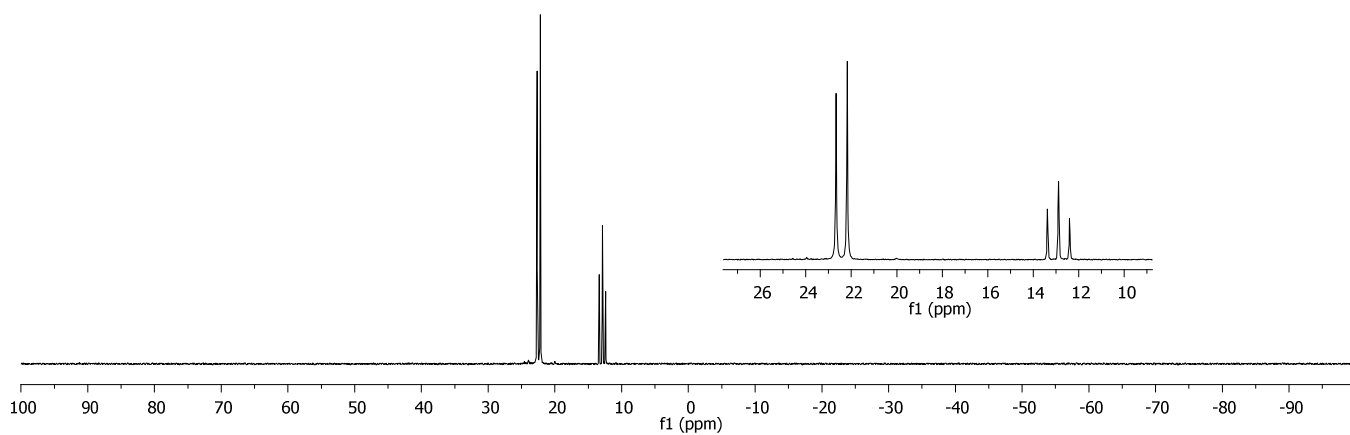

Figure S25.  $^{31}\text{P}$  NMR spectrum of compound 7 ( $\text{CDCl}_3$ , 122MHz)

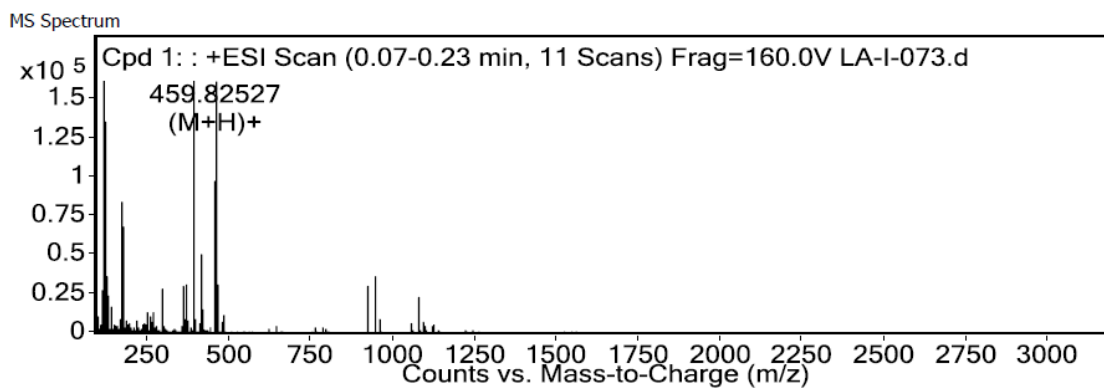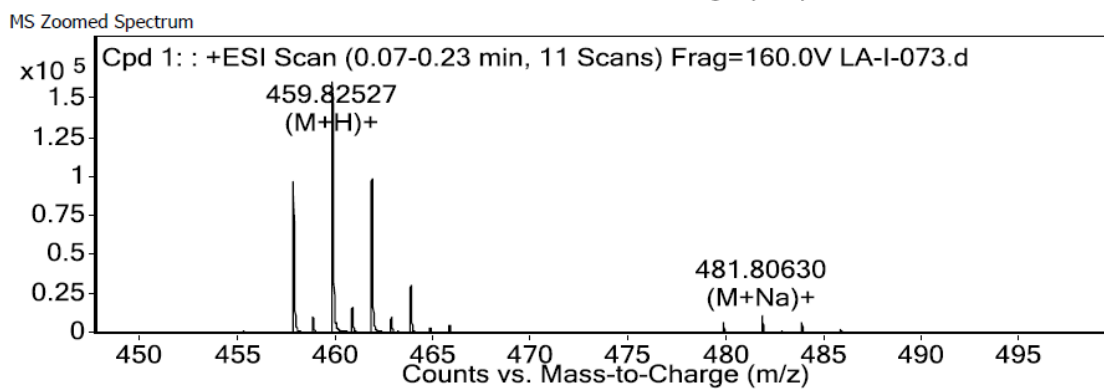

MS Spectrum Peak List

| Ion                 | Ion Formula                                                                                  | Abund   | Expe. m/z | Calc. m/z | Diff(ppm) |
|---------------------|----------------------------------------------------------------------------------------------|---------|-----------|-----------|-----------|
| (M+H) <sup>+</sup>  | C <sub>9</sub> H <sub>8</sub> Cl <sub>5</sub> N <sub>3</sub> O <sub>2</sub> P <sub>3</sub>   | 97981.9 | 457.82802 | 457.82665 | 3         |
| (M+Na) <sup>+</sup> | C <sub>9</sub> H <sub>7</sub> Cl <sub>5</sub> N <sub>3</sub> NaO <sub>2</sub> P <sub>3</sub> | 7116.5  | 479.80927 | 479.8086  | 1.4       |

Figure S26. ESI<sup>+</sup>-HRMS spectrum of compound 7

## Compound 8

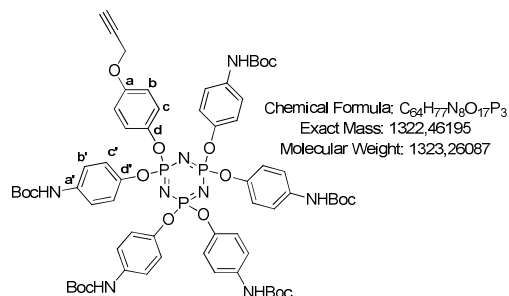

The monofunctionalized derivative **7** (74.7 mg, 0.163 mmol, 1.0 eq.) and protected *p*-aminophenol derivative **2** (278.0 mg, 1.329 mmol, 8.1 eq.) were dissolved in 10 mL of anhydrous THF. Under nitrogen atmosphere,  $Cs_2CO_3$  (2.13 g, 6.53 mmol, 40.0 eq.) was added and the mixture was stirred at reflux temperature (66°C) for 18 hours. The solution was filtered and washed with DCM. The filtrate was concentrated under reduced pressure. Column chromatography on silica (EtOAc/Hexanes 5:95 to 35:65) afforded the desired compound **8** (180.0 mg, 0.136 mmol, **83%**) as an off-white foam.

$R_f$  = 0.42, EtOAc/Hexanes 4:6.

$^1H$  NMR (300 MHz,  $CDCl_3$ ,  $\delta$  ppm): 7.07-7.00 (m, 10H,  $CH_b$ ), 6.82-6.64 (m, 19H,  $CH_b$ ,  $CH_c$ ,  $CH_c'$ , NH), 4.58 (d,  $J$  = 2.4 Hz, 2H,  $OCH_2C\equiv CH$ ), 2.46 (t, 1H,  $J$  = 2.4 Hz,  $C\equiv CH$ ), 1.46 (s, 27H,  $CH_3$ ), 1.45 (s, 18H,  $CH_3$ ).

$^{13}C$  NMR (75 MHz,  $CDCl_3$ ,  $\delta$  ppm): 154.6 ( $C_a$ ), 153.3 ( $C=O$ ), 153.1 ( $C=O$ ), 146.0 ( $C_d'$ ), 144.8 ( $C_d$ ), 135.1 ( $C_a'$ ), 135.0 ( $C_a'$ ), 122.0 ( $C_c$ ), 121.3 ( $C_c'$ ), 121.2 ( $C_c'$ ), 120.7 ( $C_b'$ ), 120.3 ( $C_b'$ ), 115.5 ( $C_b$ ), 80.5 ( $C_q$ ), 78.7 ( $C\equiv CH$ ), 75.7 ( $C\equiv CH$ ), 56.2 ( $OCH_2$ ), 28.5 ( $CH_3$ ), 28.5 ( $CH_3$ ).

$^{31}P$  NMR (122 MHz,  $CDCl_3$ ,  $\delta$  ppm): 9.9 (t,  $^2J$  = 9.3 Hz, 3P).

$m/z$  (ESI<sup>+</sup>-HRMS) for  $C_{64}H_{77}N_8O_{17}P_3$  = 1323.4692 [ $M+H$ ]<sup>+</sup>; found 1323.4664, 1345.4512 [ $M+Na$ ]<sup>+</sup>, found 1345.4484.

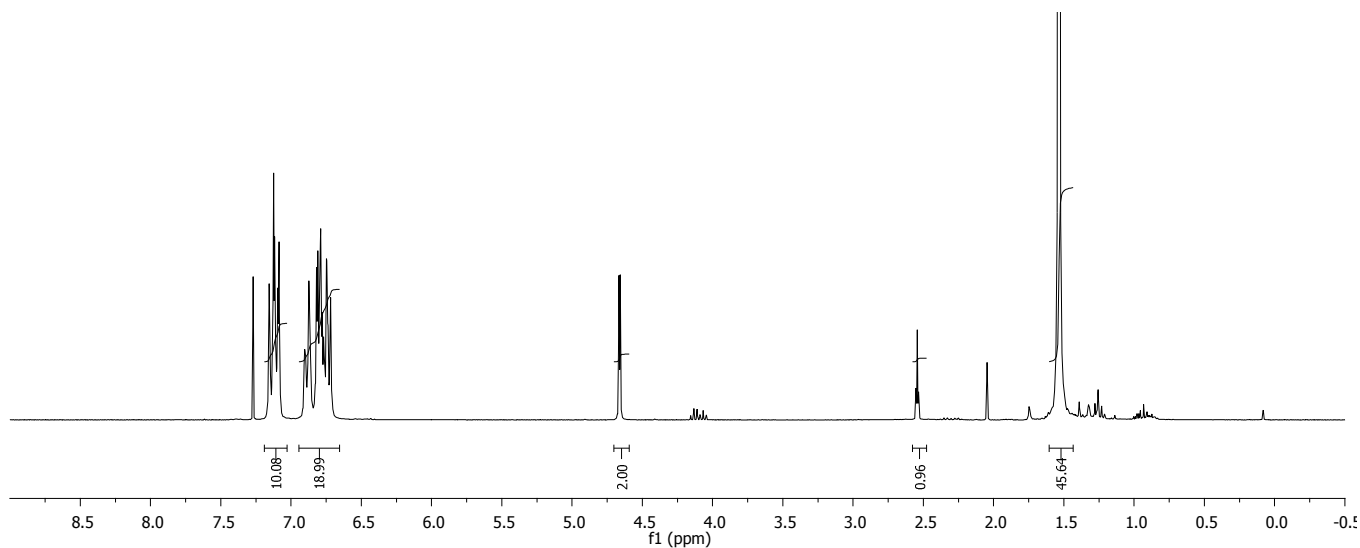

Figure S27.  $^1H$  NMR spectrum of compound **8** ( $CDCl_3$ , 300MHz)

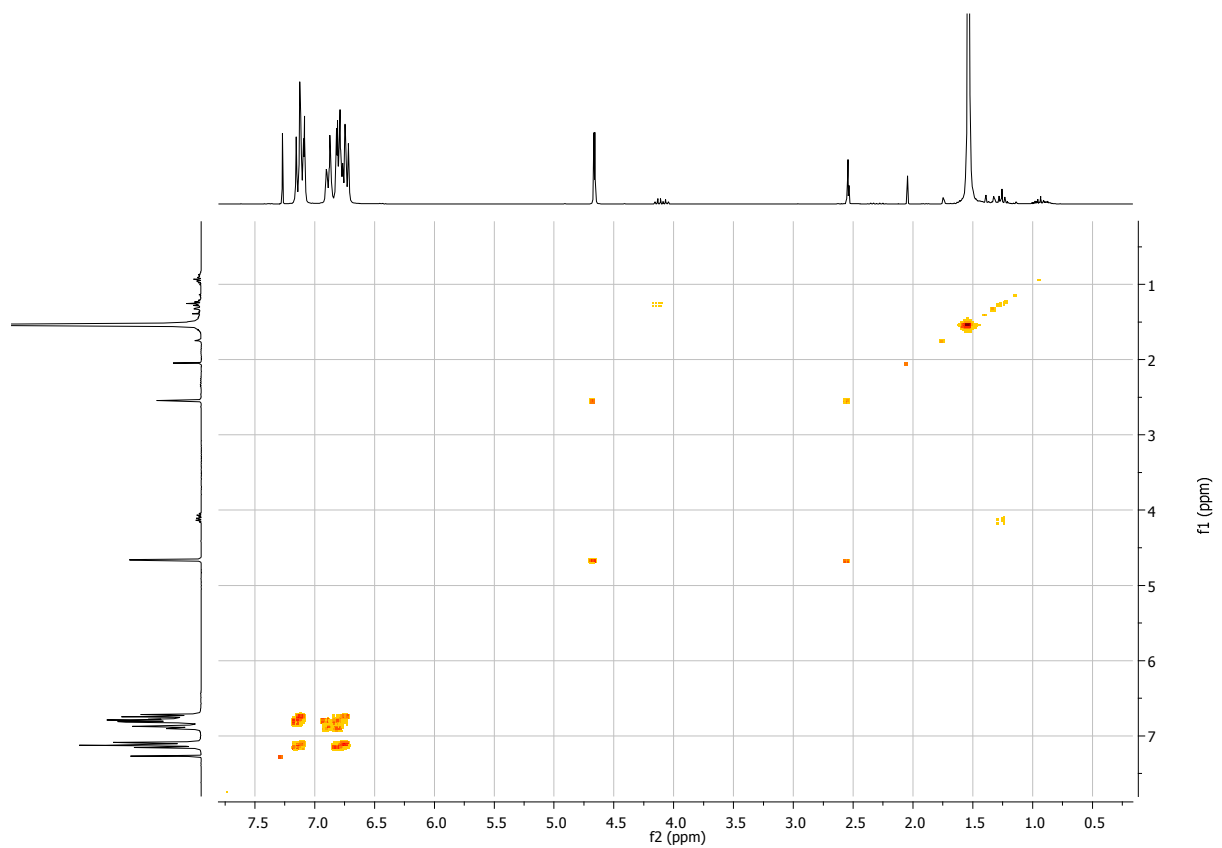

Figure S28. gCOSY spectrum of compound **8**

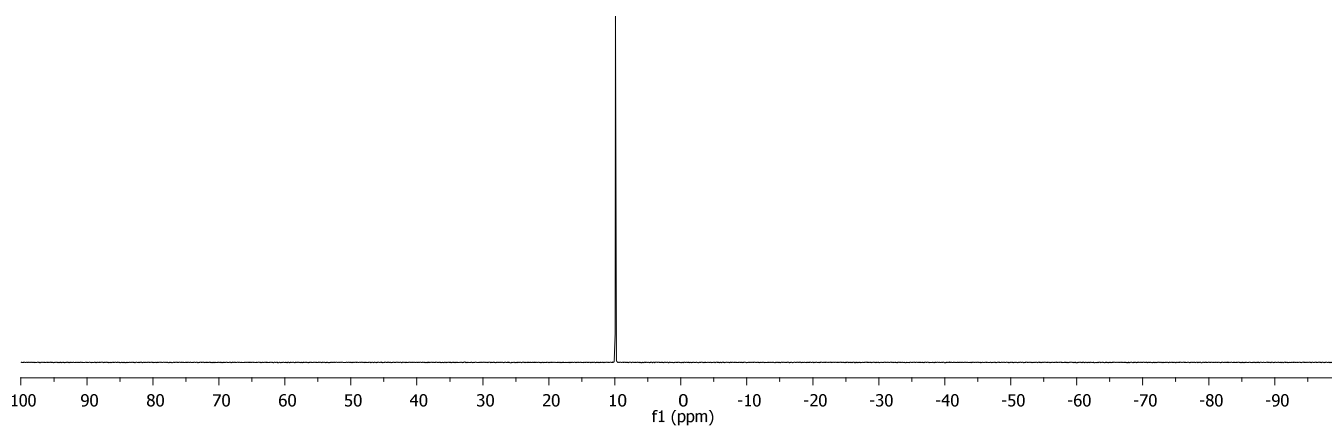

Figure S29.  $^{31}\text{P}$  NMR spectrum of compound **8** ( $\text{CDCl}_3$ , 122MHz)



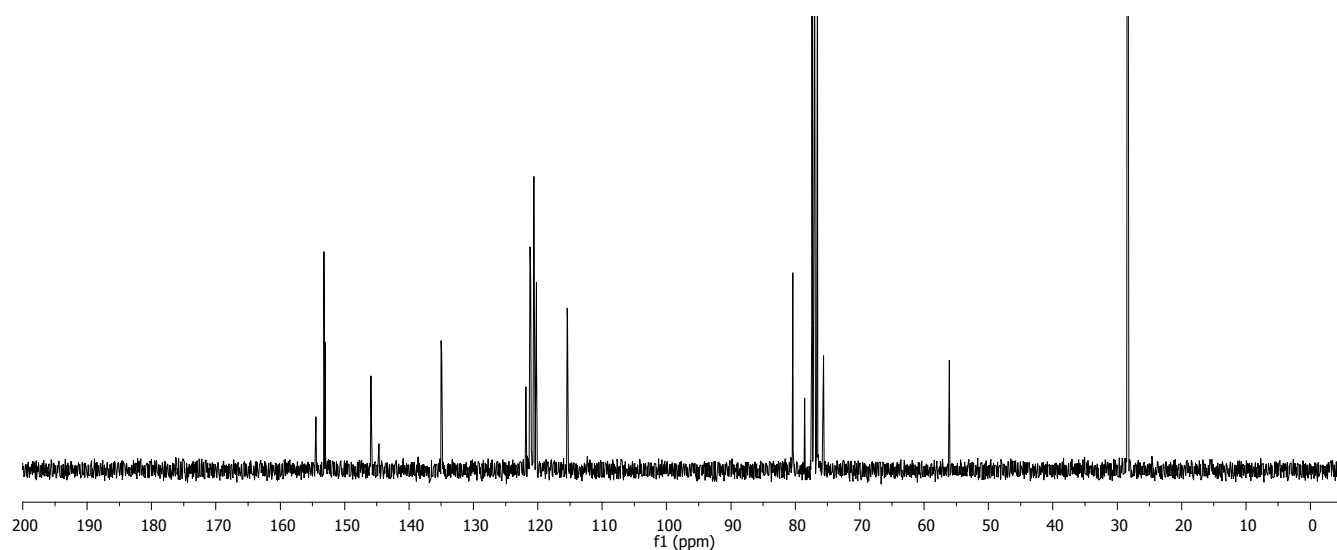

Figure S30.  $^{13}\text{C}$  NMR spectrum of compound **8** ( $\text{CDCl}_3$ , 75MHz)

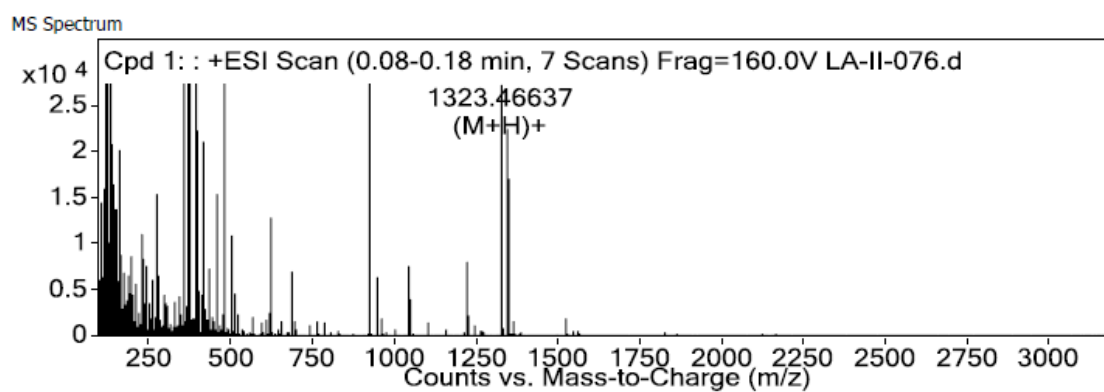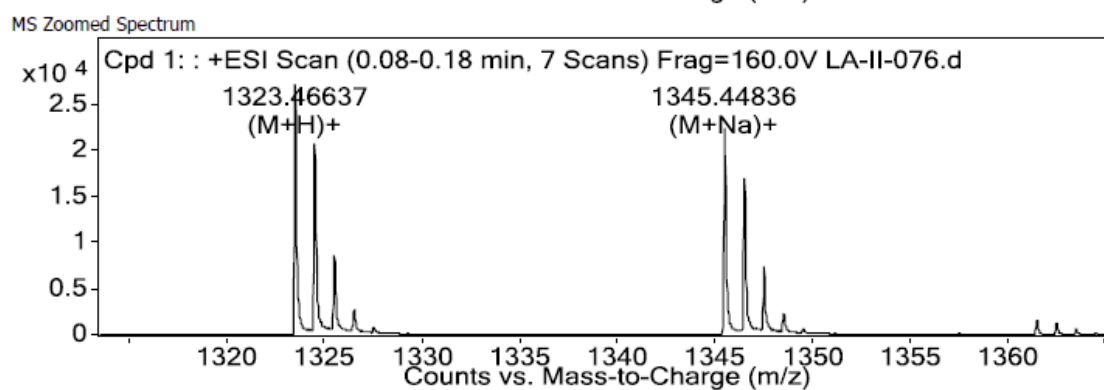

MS Spectrum Peak List

| Ion                 | Ion Formula                                                                     | Abund   | Expe. m/z  | Calc. m/z  | Diff(ppm) |
|---------------------|---------------------------------------------------------------------------------|---------|------------|------------|-----------|
| (M+H) <sup>+</sup>  | C <sub>64</sub> H <sub>78</sub> N <sub>8</sub> O <sub>17</sub> P <sub>3</sub>   | 27308   | 1323.46637 | 1323.46923 | -2.16     |
| (M+Na) <sup>+</sup> | C <sub>64</sub> H <sub>77</sub> N <sub>8</sub> NaO <sub>17</sub> P <sub>3</sub> | 22442.4 | 1345.44836 | 1345.45117 | -2.09     |

Figure S31. ESI<sup>+</sup>-HRMS spectrum of compound **8**

## Compound 9

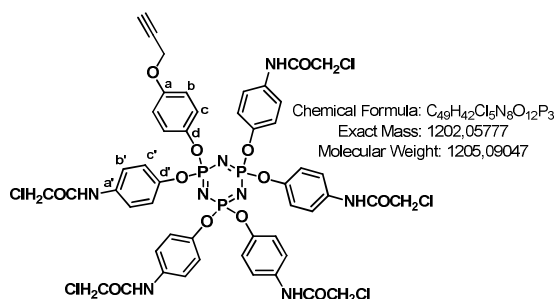

Dissymmetric hexasubstituted protected phosphazene derivative **8** (100.5 mg, 0.076 mmol, 1.0 eq.) was dissolved in 5 mL of anhydrous DCM under nitrogen atmosphere and at 0°C. Trifluoroacetic acid (TFA, 3 mL) was added dropwise over a 35 minutes period. After stirring 5 hours at rt, the solvent was removed under reduced pressure and co-evaporated with toluene. The residue was dissolved in 2 mL of anhydrous DCM and, under nitrogen atmosphere was added 159  $\mu$ L of DIPEA (117.8 mg, 0.911 mmol, 12.0 eq.). At 0°C was added dropwise chloroacetylchloride (60.4  $\mu$ L, 85.8 mg, 0.760 mmol, 10.0 eq.) in 1.5 mL of anhydrous DCM over a 2 hours period. After stirring at rt for 13 hours, the solvent was removed under reduced pressure and the residue was dissolved in 25 mL of EtOAc and washed with HCl 1M (2x20 mL),  $NH_4Cl$  (20 mL), then water (10 mL). The organic phase was dried over  $Na_2SO_4$ , and concentrated under reduced pressure. Column chromatography on silica (EtOAc/Hexanes 40:60 to 100:0) afforded the desired compound **9** (44.0 mg, 0.0370 mmol, **48%**).

$R_f$  = 0.56, DCM/MeOH 10:90.

$^1H$  NMR (300 MHz, MeOD,  $\delta$  ppm): 7.46-7.37 (dd, 10H,  $J$  = 11.2 Hz,  $J$  = 9.0 Hz,  $CH_b$ ), 6.90-6.78 (m, 14H,  $CH_b$ ,  $CH_c$ ,  $CH_c$ ), 4.69 (d, 2H,  $J$  = 2.4 Hz,  $OCH_2C\equiv CH$ ), 4.25 (2xs, 10H,  $CH_2Cl$ ), 2.95 (t,  $J$  = 2.4 Hz, 1H,  $C\equiv CH$ ).

$^{13}C$  NMR (75 MHz, MeOD,  $\delta$  ppm): 167.4 ( $C=O$ ), 156.4 ( $C_a$ ), 148.1 ( $C_{d'}$ ), 148.0 ( $C_d$ ), 136.5 ( $C_a$ ), 122.8 ( $C_c$ ), 122.9 ( $C_b$ ), 122.7 ( $C_b$ ), 122.4 ( $C_c$ ), 122.4 ( $C_c$ ), 116.8 ( $C_b$ ), 79.9 ( $C\equiv CH$ ), 77.1 ( $C\equiv CH$ ), 57.2 ( $OCH_2$ ), 44.3 ( $CH_2Cl$ ), 44.2 ( $CH_2Cl$ ).

$^{31}P$  NMR (122 MHz, MeOD,  $\delta$  ppm): 9.6 (t,  $^2J$  = 17.9 Hz, 3P).

$m/z$  (ESI<sup>+</sup>-HRMS) for  $C_{49}H_{42}Cl_5N_8O_{12}P_3$  = 624.0181 [ $M+2Na$ ]<sup>2+</sup>, found 624.0190, 1225.0470 [ $M+Na$ ]<sup>+</sup>; found 1225.0463.

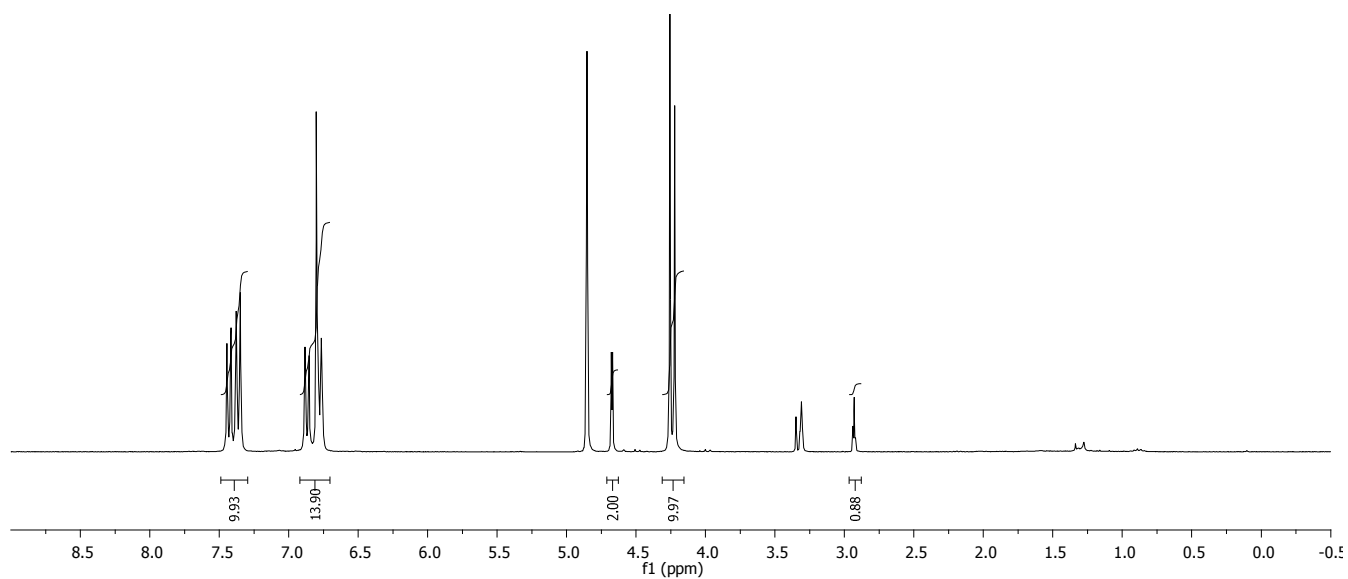

Figure S32.  $^1\text{H}$  NMR spectrum of compound **9** ( $\text{CD}_3\text{OD}$ , 300MHz)

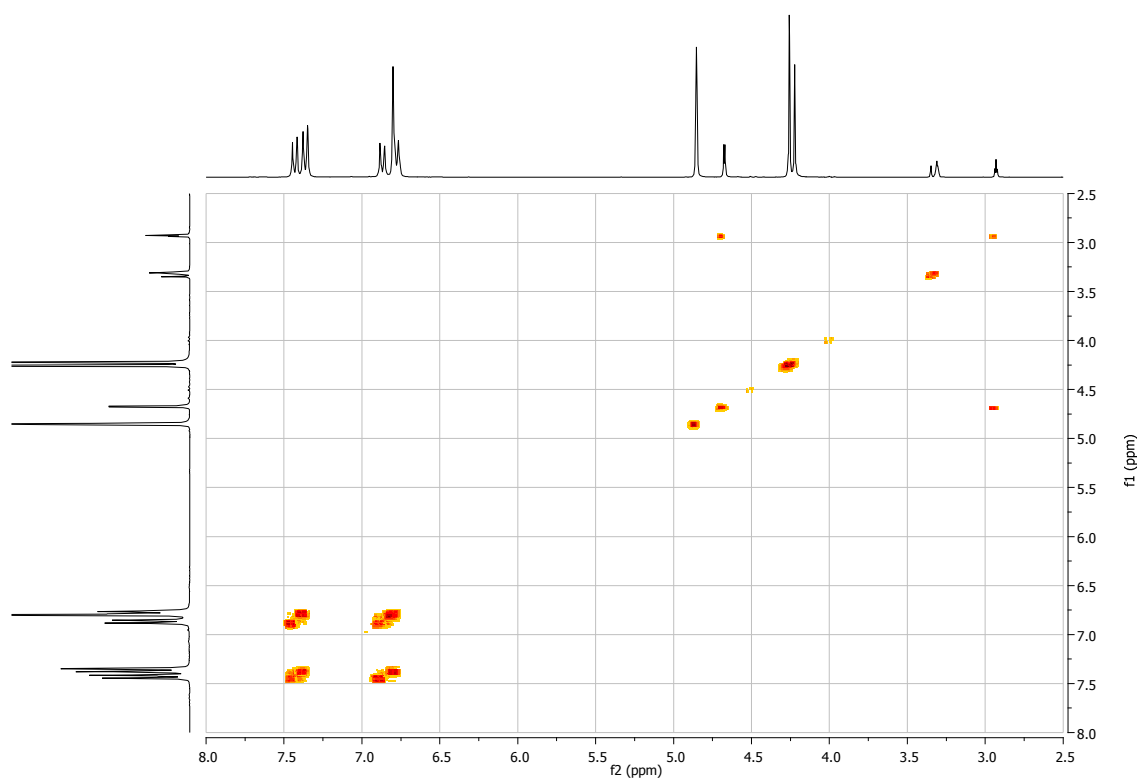

Figure S33. gCOSY spectrum of compound **9**

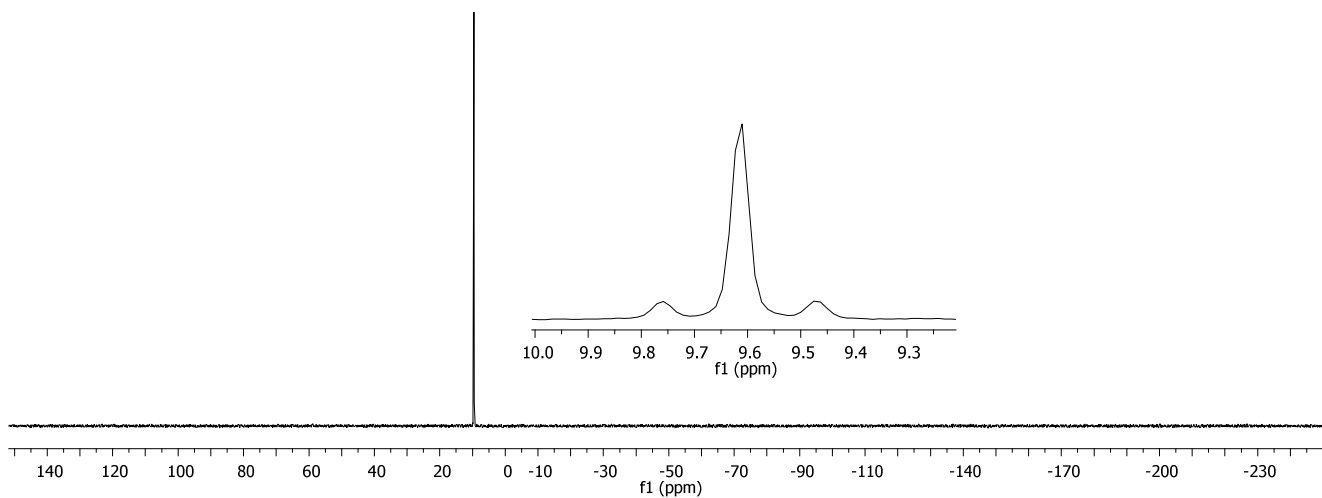

**Figure S34.**  $^{31}\text{P}$  NMR spectrum of compound **9** ( $\text{CD}_3\text{OD}$ , 122MHz)

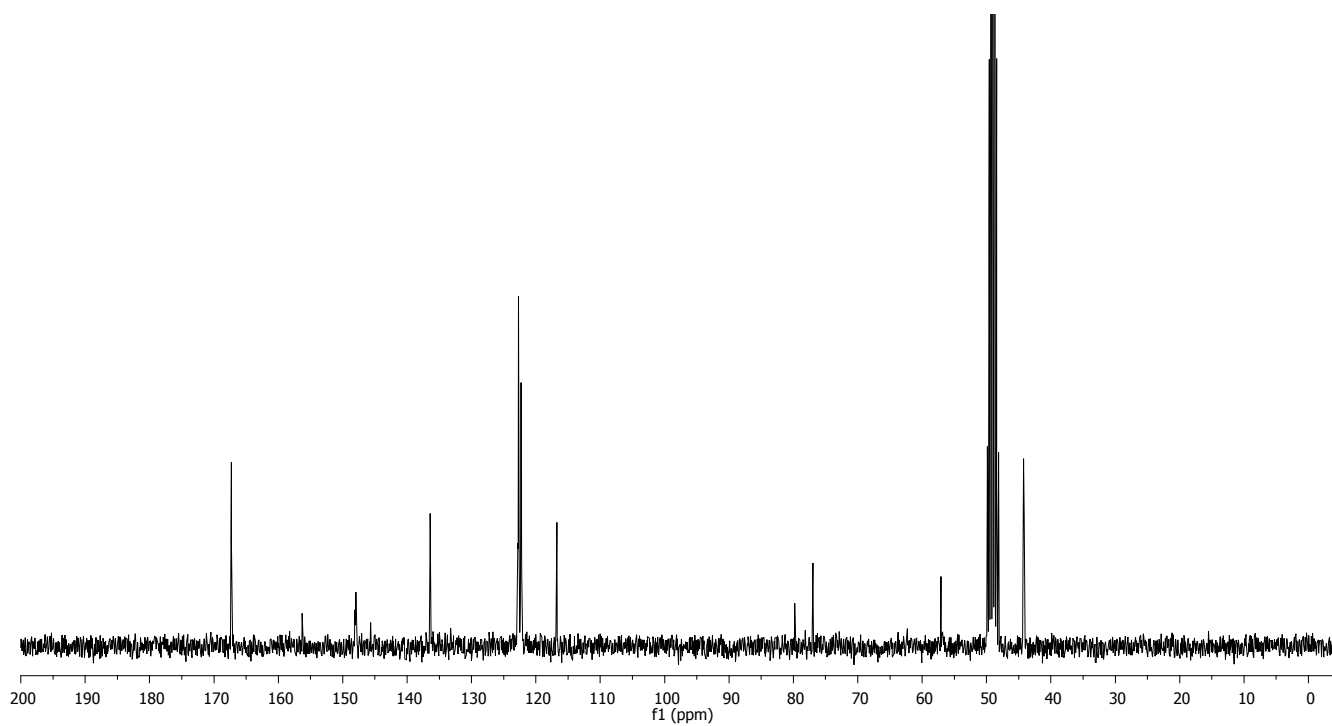

**Figure S35.**  $^{13}\text{C}$  NMR spectrum of compound **9** ( $\text{CD}_3\text{OD}$ , 75MHz)

MS Spectrum

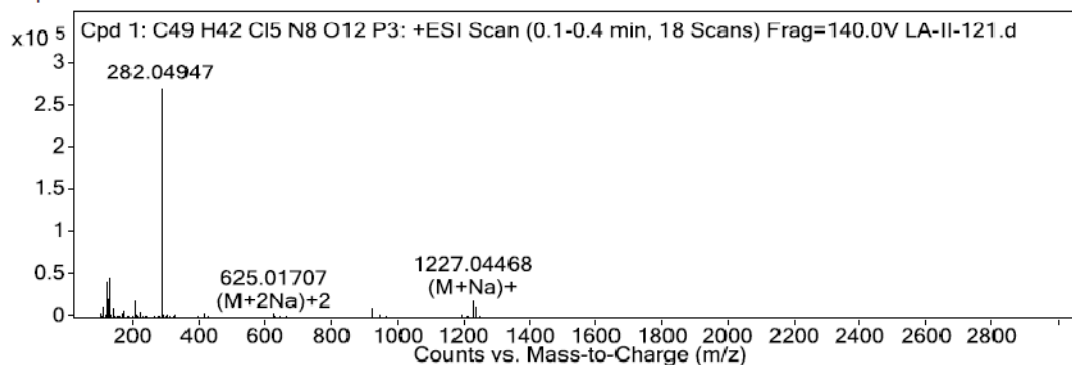

MS Zoomed Spectrum

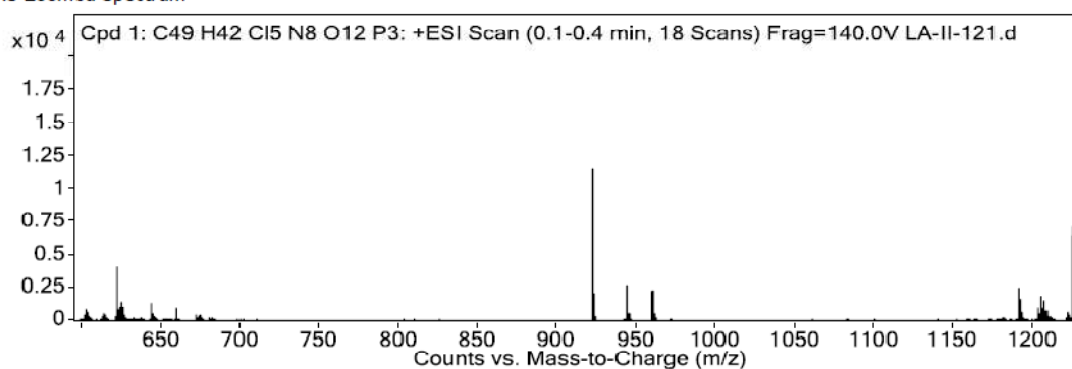

MS Spectrum Peak List

| Ion       | Formula                                                                                                       | Abund   | Observed m/z | Calc m/z   | Diff(ppm) |
|-----------|---------------------------------------------------------------------------------------------------------------|---------|--------------|------------|-----------|
| (M+2Na)+2 | C <sub>49</sub> H <sub>42</sub> Cl <sub>5</sub> N <sub>8</sub> Na <sub>2</sub> O <sub>12</sub> P <sub>3</sub> | 1074.44 | 624.01899    | 624.0181   | 0.89      |
| (M+Na)+   | C <sub>49</sub> H <sub>42</sub> Cl <sub>5</sub> N <sub>8</sub> NaO <sub>12</sub> P <sub>3</sub>               | 9275.75 | 1225.04633   | 1225.04699 | -0.66     |

Figure S36. ESI<sup>+</sup>-HRMS spectrum of compound 9

## Trivalent dendron 12

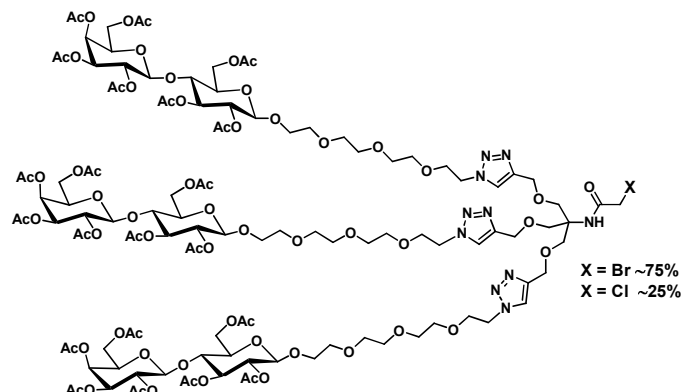

To a stirring solution of **10**<sup>1</sup> (570 mg, 680 mmol, 3.45 eq.) and tripropargylated synthon **11**<sup>4</sup> (70.0 mg, 197 mmol, 1.00 eq.) in dry THF (6 mL) were added 6 mL of H<sub>2</sub>O and a mixture of CuSO<sub>4</sub>·5H<sub>2</sub>O (44.7 mg, 179 mmol, 0.90 eq.) and Sodium ascorbate (35.5 mg, 179 mmol, 0.90 eq.). After stirring for 3 hours at 50°C in a 20 mL vial, the reaction was left stirring overnight at room temperature. EtOAc (50 mL) was added and the solution was washed successively with a saturated aqueous solution of NH<sub>4</sub>Cl (3×25 mL), water (2×20 mL) and brine (1×10 mL). The organic phase was then dried over MgSO<sub>4</sub> and concentrated under reduced pressure. Column chromatography on silica (DCM/MeOH 98:2 to 94:6) afforded the desired compound **12** (300 mg, 108 mmol, **55%**) as a colorless oil.

R<sub>f</sub> = 0.17, DCM/MeOH 95:5

<sup>1</sup>H NMR (600 MHz, CDCl<sub>3</sub>, δ ppm): 7.71 (s, 3H, H<sub>triazole</sub>), 7.05 (br s, 1H, NHCOCH<sub>2</sub>Br), 6.80 (br s, 1H, NHCOCH<sub>2</sub>Cl), 5.33 (d<sub>app</sub>, 3H, H<sub>4gal</sub>), 5.17 (dd, <sup>3</sup>J<sub>4,3</sub> = 9.4 Hz, <sup>3</sup>J<sub>3,2</sub> = 9.1 Hz, 3H, H<sub>3glc</sub>), 5.10 (dd, <sup>3</sup>J<sub>2,1</sub> = 10.5 Hz, <sup>3</sup>J<sub>3,2</sub> = 8.0 Hz, 3H, H<sub>2gal</sub>), 4.97 (dd, <sup>3</sup>J<sub>2,3</sub> = 7.0 Hz, <sup>3</sup>J<sub>3,4</sub> = 3.4 Hz, 3H, H<sub>3gal</sub>), 4.88 (dd, <sup>3</sup>J<sub>2,1</sub> = 9.4 Hz, <sup>3</sup>J<sub>3,2</sub> = 8.0 Hz, 3H, H<sub>2glc</sub>), 4.57-4.47 (m, 21H, C<sub>q</sub>CH<sub>2</sub>O, OCH<sub>2</sub>CH<sub>2</sub>N, H<sub>1glc</sub>, H<sub>6aglc</sub>, H<sub>1gal</sub>), 4.12-4.08 (m, 9H, H<sub>6bglc</sub>, H<sub>6agal</sub>, H<sub>6bgal</sub>), 3.89-3.57 (m, 59H, CH<sub>2</sub>Br/Cl, OCH<sub>2</sub>CH<sub>2</sub>N, OCH<sub>2</sub>, H<sub>4glc</sub>, H<sub>5gal</sub>, H<sub>5glc</sub>), 2.18-1.97 (m, 63H, COCH<sub>3</sub>).

<sup>13</sup>C NMR (150 MHz, CDCl<sub>3</sub>, δ ppm): 170.3, 170.3, 170.1, 170.0, 169.7, 169.6, 169.0 (7xs, COCH<sub>3</sub>), 166.7 (CO), 144.4 (C<sub>triazole</sub>=CH), 123.7 (C=C<sub>triazole</sub>H), 101.0 (C<sub>1gal</sub>), 100.5 (C<sub>1glc</sub>), 76.2 (C<sub>4glc</sub>), 72.7 (C<sub>3glc</sub>), 72.5 (C<sub>5glc</sub>), 71.5 (C<sub>2glc</sub>), 70.9 (C<sub>3gal</sub>), 70.6 (C<sub>5gal</sub>), 70.5, 70.4, 70.2, 69.4 (OCH<sub>2</sub>), 69.0 (C<sub>2gal</sub>), 69.0 (OCH<sub>2</sub>), 68.6 (C<sub>q</sub>CH<sub>2</sub>O), 66.5 (C<sub>4gal</sub>), 64.6 (OCH<sub>2</sub>C=C), 61.9 (C<sub>6glc</sub>), 60.7 (C<sub>6gal</sub>), 60.2 (C<sub>q</sub>), 50.2 (N<sub>triazole</sub>CH<sub>2</sub>), 42.3 (CH<sub>2</sub>Cl), 29.8 (CH<sub>2</sub>Br), 20.8, 20.8, 20.7, 20.6, 20.6, 20.6, 20.5 (7xs, COCH<sub>3</sub>).

m/z (ESI<sup>+</sup> HRMS) for C<sub>117</sub>H<sub>171</sub>BrN<sub>10</sub>O<sub>67</sub> = 1434.4805 [M+2H]<sup>2+</sup>, found 1434.4843, 1456.4624 [M+2Na]<sup>2+</sup>, found 1456.4624.

<sup>4</sup> Y. M. Chabre, C. Contino-Pépin, V. Placide, T. C. Shiao and R. Roy, *J. Org. Chem.*, 2008, **73**, 5602–5605.

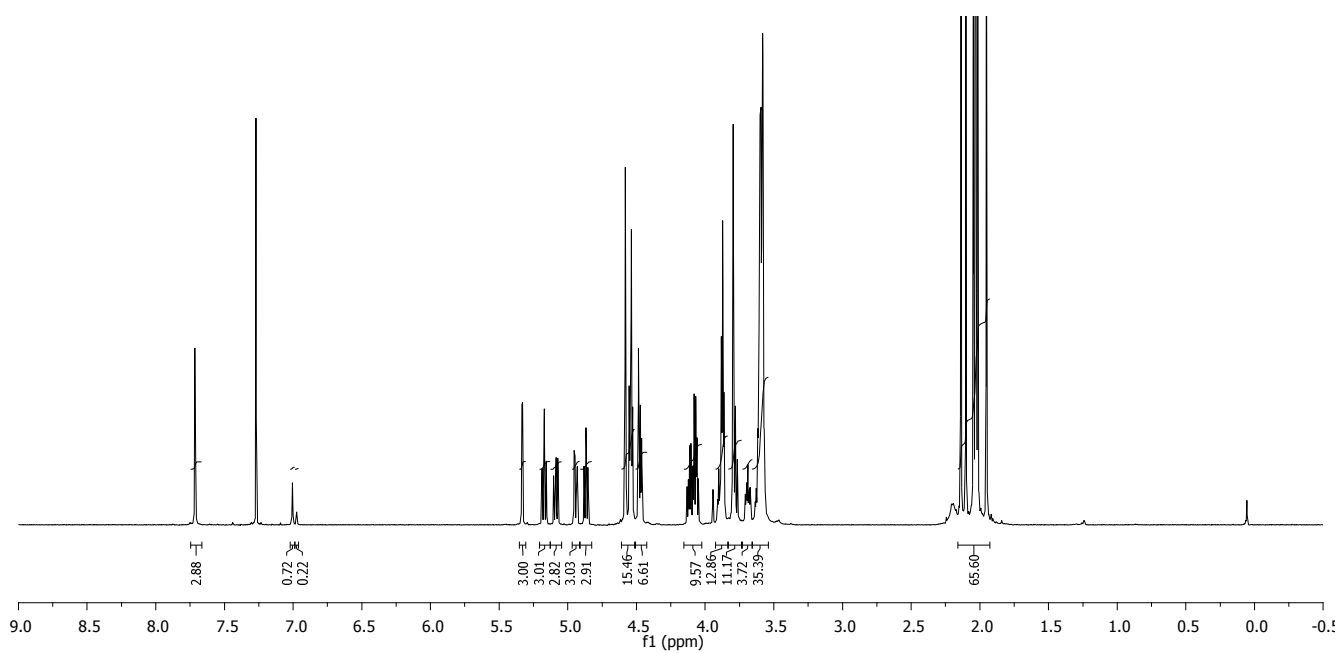

Figure S37.  $^1\text{H}$  NMR spectrum of compound **12** ( $\text{CDCl}_3$ , 600MHz)

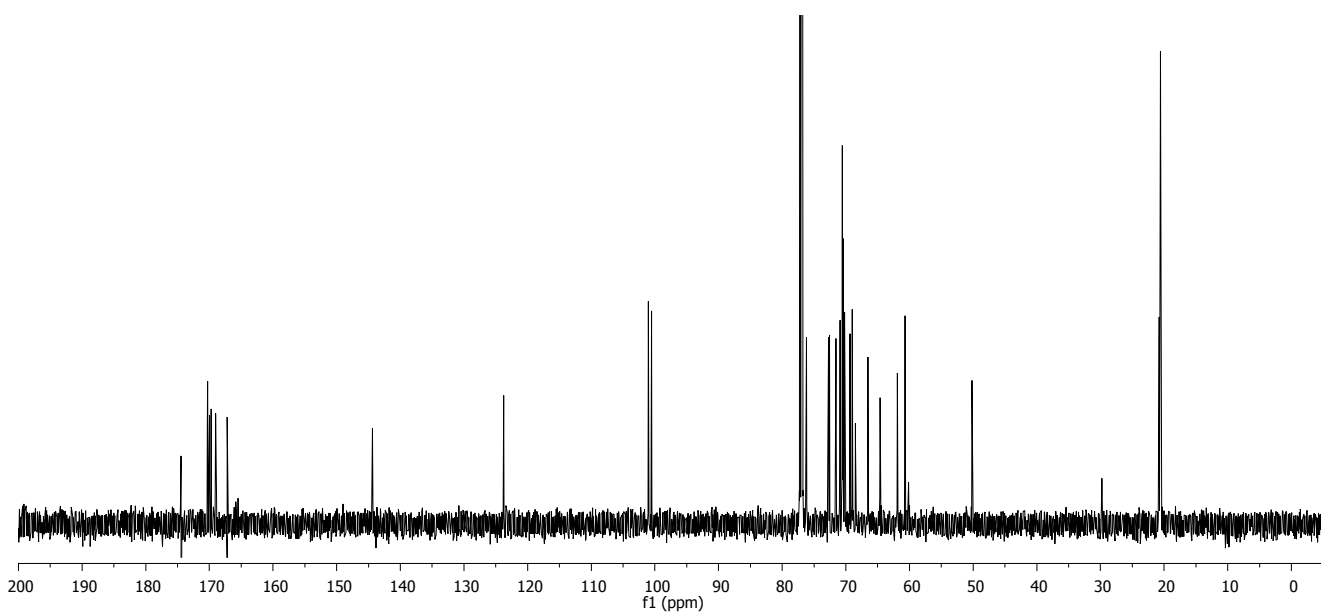

Figure S38.  $^{13}\text{C}$  NMR spectrum of compound **12** ( $\text{CDCl}_3$ , 150MHz)

MS Spectrum

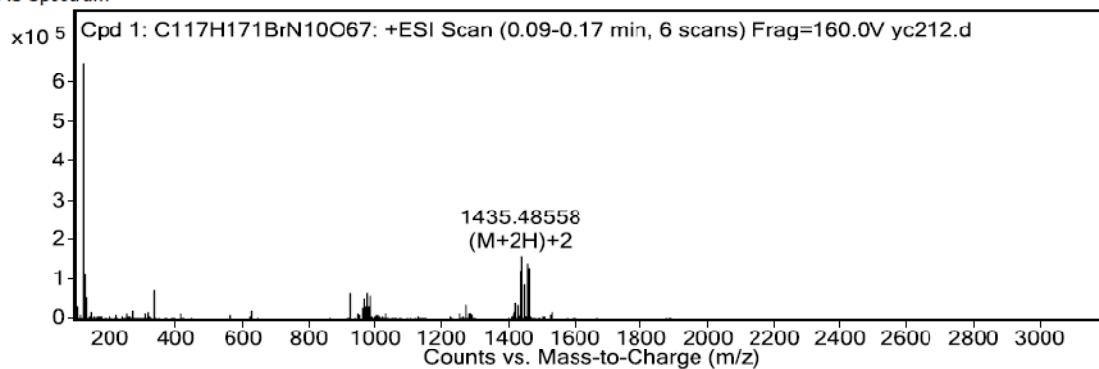

MS Zoomed Spectrum

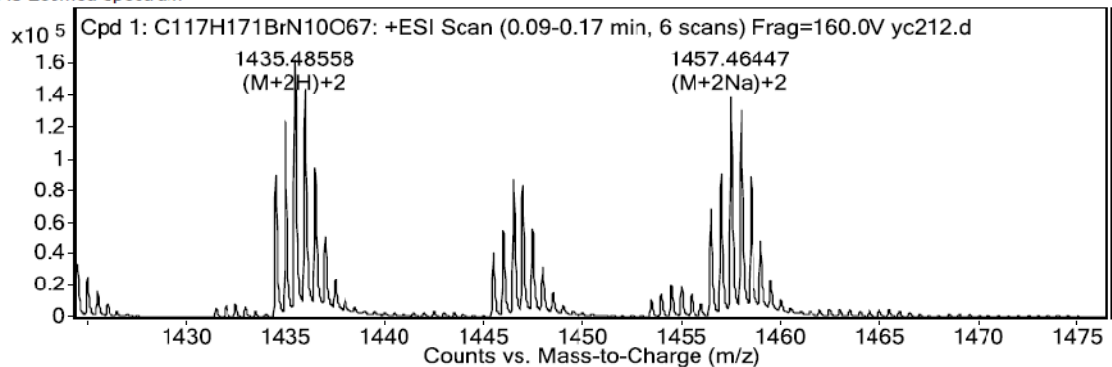

MS Spectrum Peak List

| Ion       | Ion Formula                                                                        | Abund | Expe. m/z  | Calc. m/z  | Diff(ppm) |
|-----------|------------------------------------------------------------------------------------|-------|------------|------------|-----------|
| (M+2H)+2  | C <sub>117</sub> H <sub>173</sub> BrN <sub>10</sub> O <sub>6</sub>                 | 91472 | 1434.48427 | 1434.4805  | 2.63      |
| (M+2Na)+2 | C <sub>117</sub> H <sub>171</sub> BrN <sub>10</sub> Na <sub>2</sub> O <sub>6</sub> | 68812 | 1456.46235 | 1456.46244 | -0.06     |

Figure S39. ESI<sup>+</sup>-HRMS spectrum of compound 12



## Pentavalent dendron 13

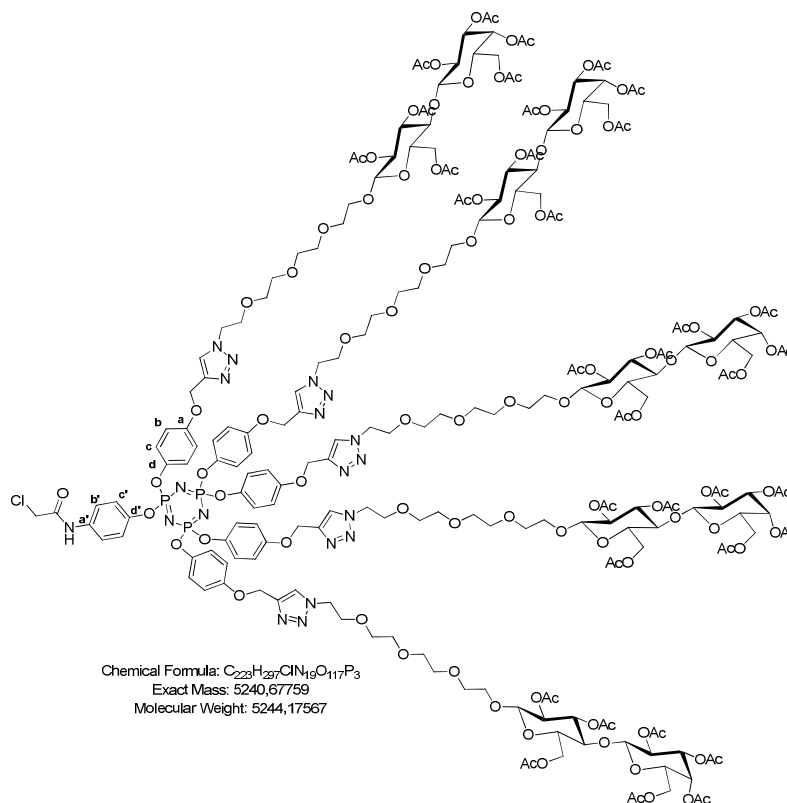

To a solution of pentapropargylated cyclotriphosphazene derivative **6** (55.8 mg, 0.053 mmol, 1.0 eq.) in a 1:1 mixture of  $H_2O/THF_{anh}$  (8 mL), were added azido derivative **10** (456.7 mg, 0.545 mmol, 10.0 eq.),  $CuSO_4 \cdot 5H_2O$  (102.8 mg, 0.412 mmol, 7.8 eq.) and sodium ascorbate (83.5 mg, 0.421 mmol, 8.0 eq.). While stirring, the mixture was first heated at  $50^\circ C$  for 3 hours in a 20 mL vial and at room temperature for additional 18 hours. Ethyl acetate (30 mL) was added and the solution was poured into a separatory funnel containing ethyl acetate (20 mL), washed with saturated aqueous  $NH_4Cl$  (2x20 mL), water (20 mL) and brine (10 mL). Organics were collected, dried over  $Na_2SO_4$  and concentrated to dryness *in vacuo* with rotary evaporator. Purification by flash chromatography ( $SiO_2$ , DCM/MeOH 100:0 to 90:10) afforded desired multivalent compound **13** (230.5 mg, 0.044 mmol, **83%**).

$R_f = 0.59$ , DCM/MeOH 90:10

$^1H$  NMR (600 MHz,  $CDCl_3$ ,  $\delta$  ppm): 9.43 (s, 1H, NH), 7.88 (s, 2H,  $H_{triazole}$ ), 7.82 (2xs, 3H,  $H_{triazole}$ ), 7.34 (d,  $^3J = 8.6$  Hz, 2H,  $CH_b$ ), 6.91-6.75 (m, 20H,  $CH_b$ ,  $CH_c$ ), 6.57 (d,  $^3J = 8.6$  Hz, 2H,  $CH_c$ ), 5.31 ( $d_{app}$ , 5H,  $H_{4gal}$ ), 5.16-5.05 (m, 20H,  $H_{3glc}$ ,  $C_qCH_2O$ ,  $H_{2gal}$ ), 4.92 (dd,  $^3J_{2,3} = 2.3$  Hz,  $^3J_{3,4} = 3.5$  Hz, 5H,  $H_{3gal}$ ), 4.84 ( $t_{app}$ , 6H,  $H_{2glc}$ ), 4.53-4.45 (m, 25H,  $CH_2N$ ,  $H_{1glc}$ ,  $H_{6aglc}$ ,  $H_{1gal}$ ), 4.22 (s, 2H  $CH_2Cl$ ), 4.11-4.03 (m, 15H,  $H_{6bglc}$ ,  $H_{6agal}$ ,  $H_{6bgal}$ ), 3.87-3.54 (m, 80H,  $H_{5gal}$ ,  $H_{5glc}$ ,  $H_{4glc}$ ,  $OCH_2$ ), 2.14-1.93 (m, 105H,  $COCH_3$ ).

$^{13}C$  NMR (150 MHz,  $CDCl_3$ ,  $\delta$  ppm): 170.2, 170.2, 170.0, 169.9, 169.6, 169.5, 169.0 (7xs,  $COCH_3$ ), 164.6 (C=O), 155.2 + 155.2 ( $C_a$ ), 146.6 ( $C_d$ ), 144.4 ( $C_{triazole=CH}$ ), 144.1 ( $C_d$ ), 143.5 ( $C_{triazole=CH}$ ), 143.3 ( $C_{triazole=CH}$ ), 134.5 ( $C_a$ ),

124.4 ( $C_{\text{triazole}=\text{CH}}$ ), 124.0 ( $C_{\text{triazole}=\text{CH}}$ ), 121.8 ( $C_c$ ), 121.8 ( $C_c$ ), 121.7( $C_b$ ), 121.0 ( $C_c$ ), 120.8 ( $C_c$ ), 115.2 ( $C_b$ ), 115.0 ( $C_b$ ), 100.9 ( $C_{1\text{gal}}$ ), 100.4 ( $C_{1\text{glc}}$ ), 76.1 ( $C_{4\text{glc}}$ ), 72.7 ( $C_{3\text{glc}}$ ), 72.5 ( $C_{5\text{glc}}$ ), 72.5 ( $C_{2\text{glc}}$ ), 71.5 ( $C_{3\text{gal}}$ ), 70.8 ( $C_{5\text{gal}}$ ), 70.5, 70.5, 70.4, 70.3, 70.3, 70.1, 70.1, 69.2, 69.2 ( $\text{OCH}_2$ ), 68.9 ( $C_{2\text{gal}}$ ), 68.9 ( $\text{OCH}_2$ ), 66.5 ( $C_{4\text{gal}}$ ), 62.2 ( $\text{OCH}_2\text{C}=\text{C}$ ), 61.9 ( $C_{6\text{glc}}$ ), 61.7 ( $C_{6\text{gal}}$ ), 60.6, 50.2 ( $\text{NCH}_2$ ), 50.1 ( $\text{NCH}_2$ ), 43.4 ( $\text{CH}_2\text{Cl}$ ), 20.7, 20.7, 20.6, 20.5, 20.5, 20.5, 20.4 (7xs,  $\text{COCH}_3$ ).

$^{31}\text{P}$  NMR (122 MHz,  $\text{CDCl}_3$ ,  $\delta$  ppm): 10.2-9.4 (m, 3P).

IR (neat,  $\nu \text{ cm}^{-1}$ ) 2878 (m), 1743 (s), 1501 (m), 1367 (m), 1216 (s), 1042 (m), 833 (w).

$m/z$  (ESI<sup>+</sup>-HRMS) for  $\text{C}_{223}\text{H}_{297}\text{ClN}_{19}\text{O}_{117}\text{P}_3$  = 1747.8998 [ $M+3\text{H}$ ]<sup>3+</sup>; found 1747.8958, 1769.8818 [ $M+3\text{Na}$ ]<sup>3+</sup>, found 1769.8798.

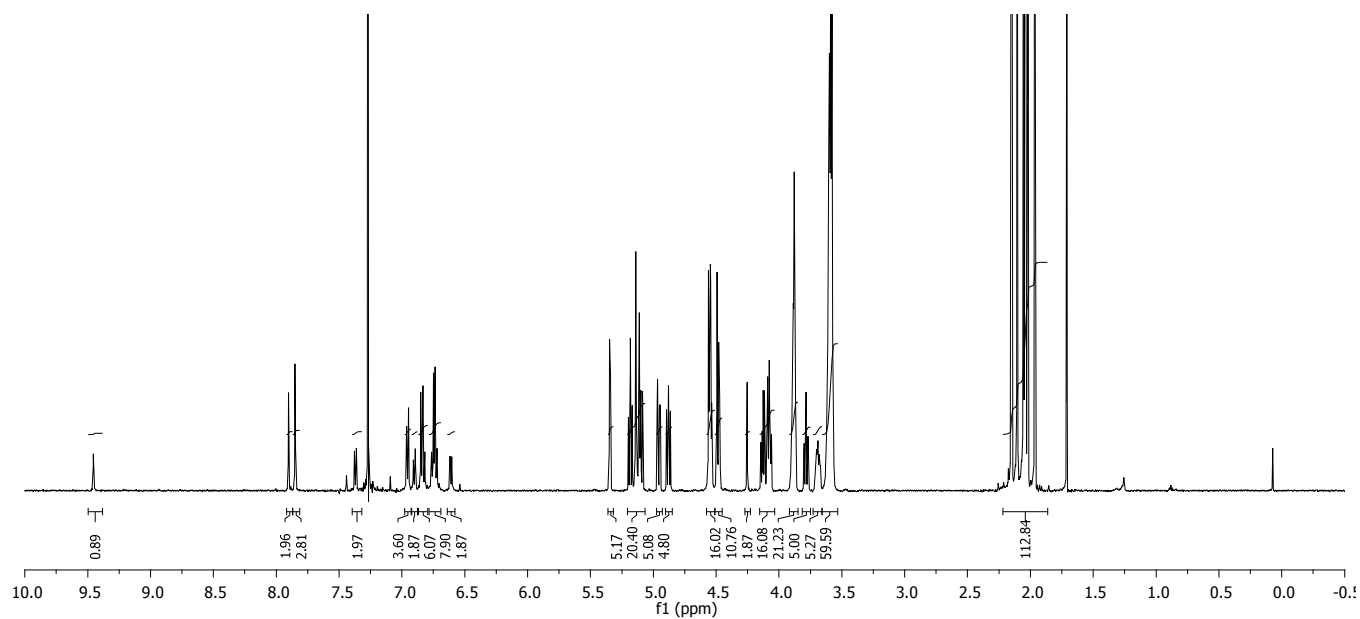

Figure S40.  $^1\text{H}$  NMR spectrum of compound **13** ( $\text{CDCl}_3$ , 600MHz)

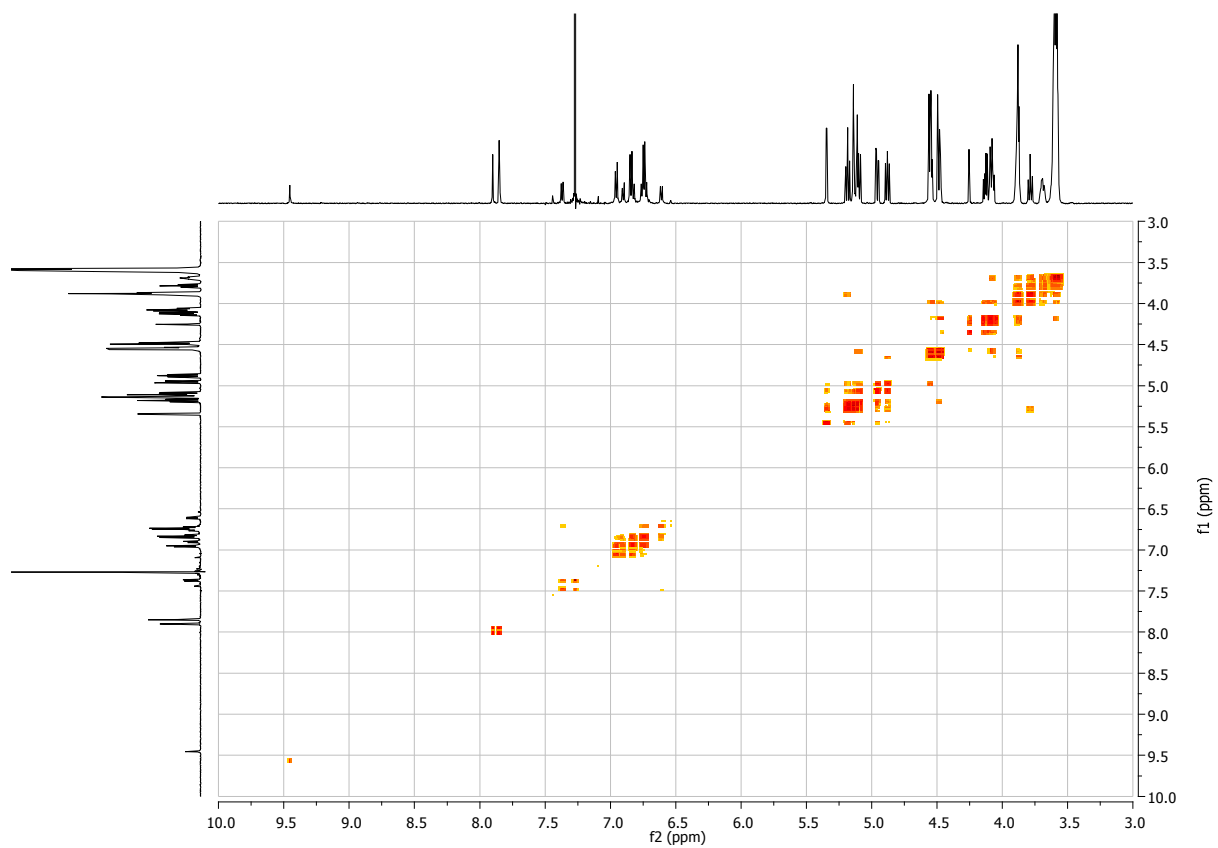

Figure S41. gCOSY spectrum of compound **13**

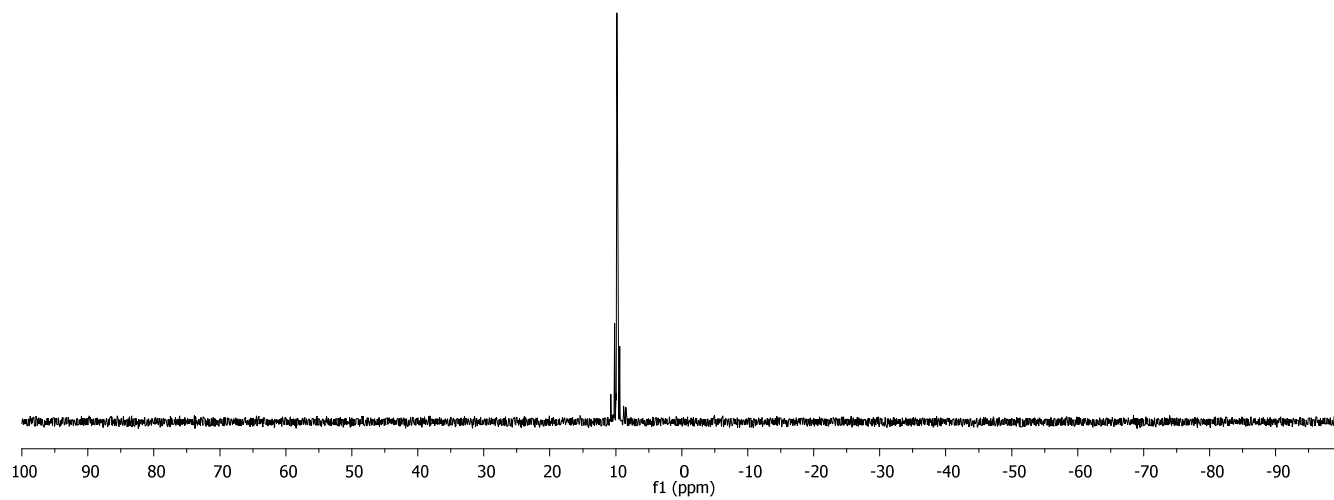

Figure S42.  $^{31}\text{P}$  NMR spectrum of compound **13** ( $\text{CDCl}_3$ , 122MHz)

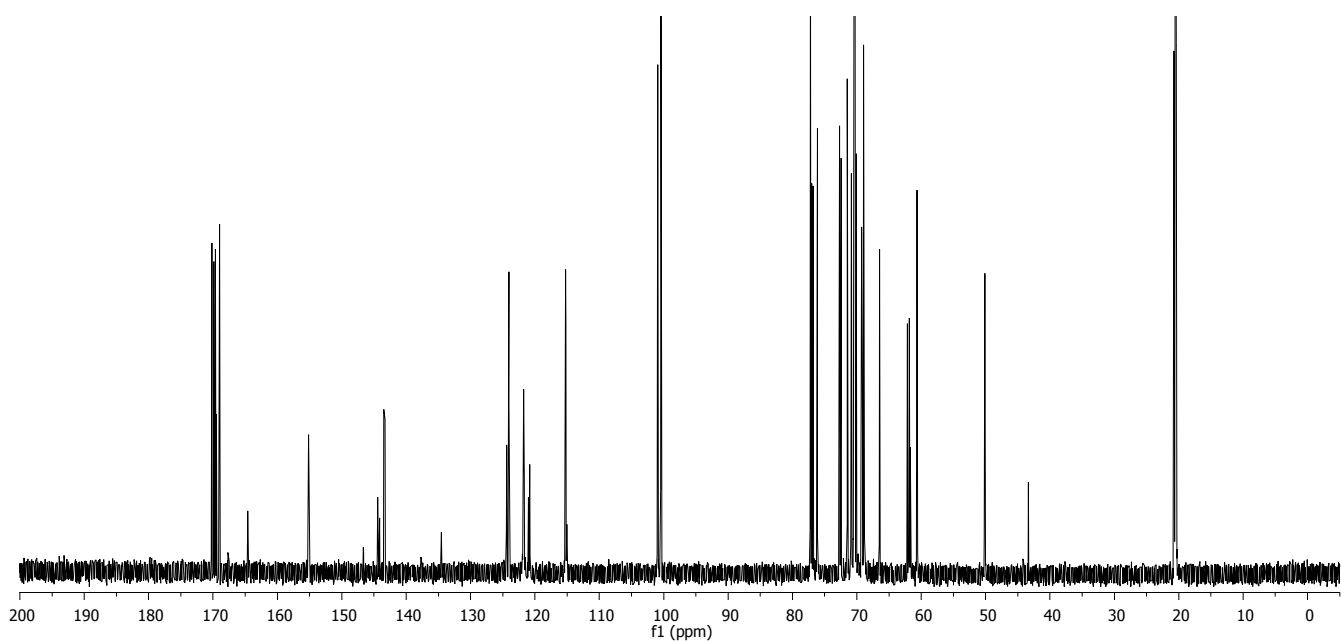

Figure S43. <sup>13</sup>C NMR spectrum of compound 13 (CDCl<sub>3</sub>, 150MHz)

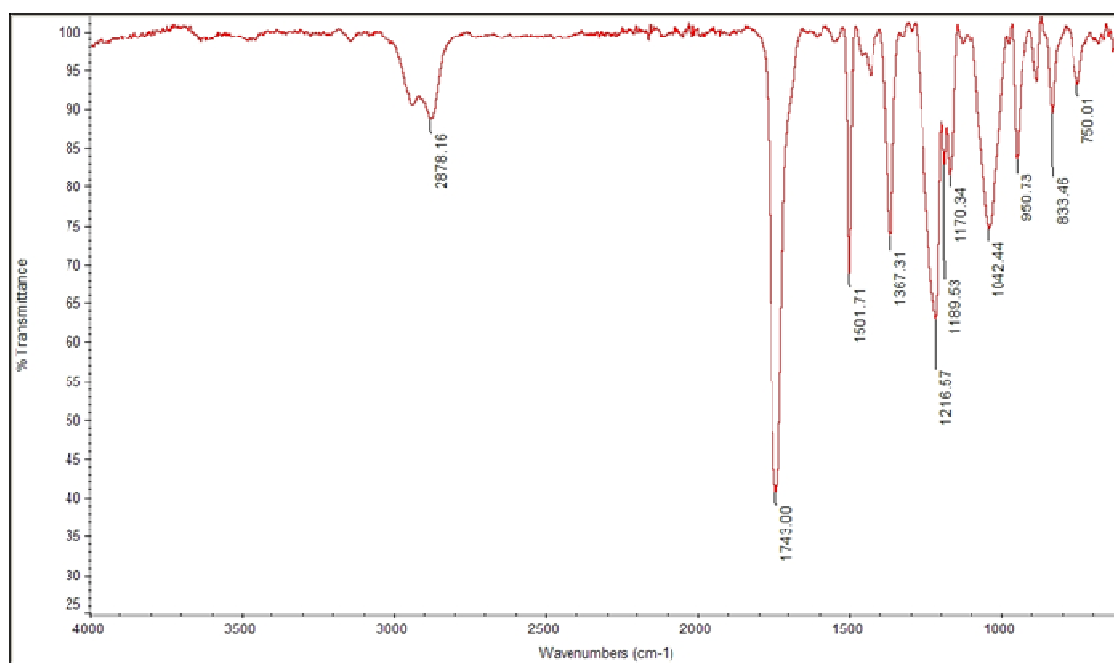

Figure S44. FT-IR spectrum of compound 13

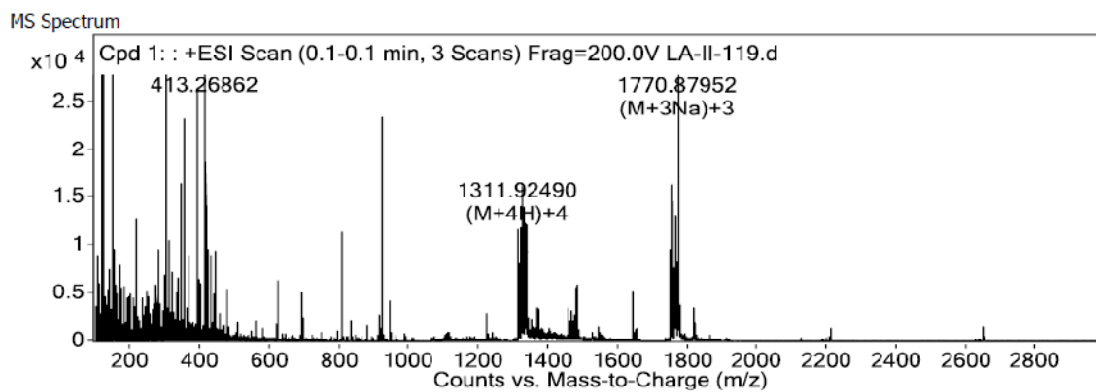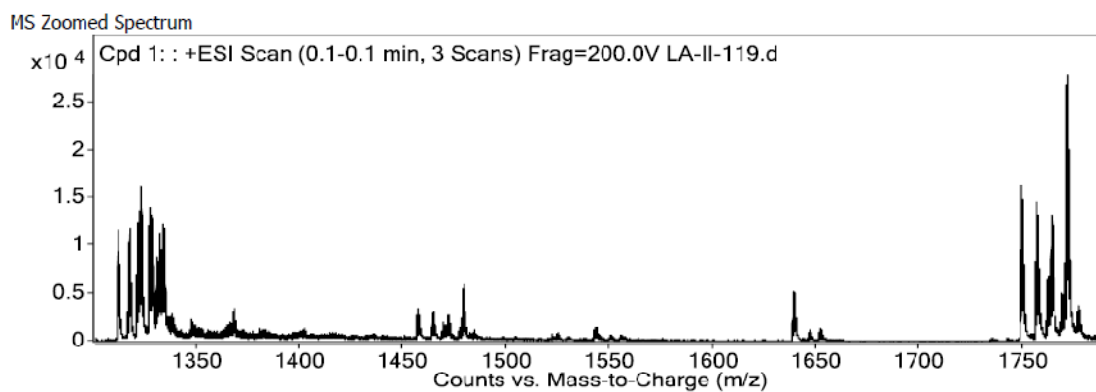

**MS Spectrum Peak List**

| Ion       | Ion Formula                                                                                        | Abund  | Expe. m/z  | Calc. m/z  | Diff(ppm) |
|-----------|----------------------------------------------------------------------------------------------------|--------|------------|------------|-----------|
| (M+4H)+4  | C <sub>223</sub> H <sub>301</sub> CIN <sub>19</sub> O <sub>11</sub> P <sub>3</sub>                 | 2878.5 | 1311.18078 | 1311.17667 | 3.13      |
| (M+3H)+3  | C <sub>223</sub> H <sub>300</sub> CIN <sub>19</sub> O <sub>11</sub> P <sub>3</sub>                 | 3627.3 | 1747.89583 | 1747.89981 | -2.27     |
| (M+3Na)+3 | C <sub>223</sub> H <sub>297</sub> CIN <sub>19</sub> Na <sub>3</sub> O <sub>11</sub> P <sub>3</sub> | 8407.5 | 1769.87979 | 1769.88175 | -1.11     |

**Figure S45.** ESI<sup>+</sup>-HRMS spectrum of compound **13**

## Trivalent dendron **14**

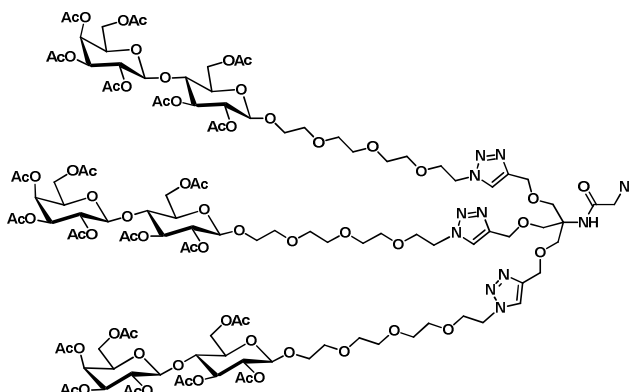

To a stirring solution of **12** (443.9 mg, 0.155 mmol, 1.0 eq) in dry DMF (6 mL) under a nitrogen atmosphere were added sodium azide (25.1 mg, 0.386 mmol, 2.5 eq.) and sodium iodide (2.3 mg, 0.015 mmol, 0.1 eq.). After stirring overnight at 70°C, the solvent was removed and EtOAc was added, then the solution was washed successively with water (4x50 mL) and brine (3x25 mL). The organic phase was then dried over Na<sub>2</sub>SO<sub>4</sub> and concentrated under reduced pressure. Column chromatography on silica (EtOAc/Acetone 90:10 to 30:70) afforded the desired compound **27** (339.1 mg, 0.120 mmol, **77%**) as a colorless oil.

R<sub>f</sub> = 0.30, DCM/MeOH 94:6

**<sup>1</sup>H NMR** (600 MHz, CDCl<sub>3</sub>, δ ppm): 7.70 (s, 3H, H<sub>triazole</sub>), 6.80 (br s, 1H, NH), 5.33 (d<sub>app</sub>, 3H, H<sub>4gal</sub>), 5.17 (dd, <sup>3</sup>J<sub>4,3</sub> = 9.4 Hz, <sup>3</sup>J<sub>3,2</sub> = 9.1 Hz, 3H, H<sub>3glc</sub>), 5.10 (dd, <sup>3</sup>J<sub>2,1</sub> = 10.5 Hz, <sup>3</sup>J<sub>3,2</sub> = 8.0 Hz, 3H, H<sub>2gal</sub>), 4.97 (dd, <sup>3</sup>J<sub>2,3</sub> = 7.0 Hz, <sup>3</sup>J<sub>3,4</sub> = 3.4 Hz, 3H, H<sub>3gal</sub>), 4.88 (dd, <sup>3</sup>J<sub>2,1</sub> = 9.4 Hz, <sup>3</sup>J<sub>3,2</sub> = 8.0 Hz, 3H, H<sub>2glc</sub>), 4.57-4.47 (m, 21H, C<sub>q</sub>CH<sub>2</sub>O, OCH<sub>2</sub>CH<sub>2</sub>N, H<sub>1glc</sub>, H<sub>6aglc</sub>, H<sub>1gal</sub>), 4.12-4.08 (m, 9H, H<sub>6bglc</sub>, H<sub>6agal</sub>, H<sub>6bgal</sub>), 3.89-3.57 (m, 59H, CH<sub>2</sub>N<sub>3</sub>, OCH<sub>2</sub>CH<sub>2</sub>N, OCH<sub>2</sub>, H<sub>4glc</sub>, H<sub>5gal</sub>, H<sub>5glc</sub>), 2.18-1.97 (m, 63H, COCH<sub>3</sub>).

**<sup>13</sup>C NMR** (150 MHz, CDCl<sub>3</sub>, δ ppm): 170.3, 170.3, 170.1, 170.0, 169.7, 169.6, 169.0 (7xs, COCH<sub>3</sub>), 166.7 (CO), 144.4 (C<sub>triazole</sub>=CH), 123.7 (C=C<sub>triazole</sub>H), 101.0 (C<sub>1gal</sub>), 100.5 (C<sub>1glc</sub>), 76.2 (C<sub>4glc</sub>), 72.7 (C<sub>3glc</sub>), 72.5 (C<sub>5glc</sub>), 71.5 (C<sub>2glc</sub>), 70.9 (C<sub>3gal</sub>), 70.6 (C<sub>5gal</sub>), 70.5, 70.4, 70.2, 69.4 (OCH<sub>2</sub>), 69.0 (C<sub>2gal</sub>), 69.0 (OCH<sub>2</sub>), 68.6 (C<sub>q</sub>CH<sub>2</sub>O), 66.5 (C<sub>4gal</sub>), 64.6 (OCH<sub>2</sub>C=C), 61.9 (C<sub>6glc</sub>), 60.7 (C<sub>6gal</sub>), 60.0 (C<sub>q</sub>), 52.6 (CH<sub>2</sub>N<sub>3</sub>), 50.2 (N<sub>triazole</sub>CH<sub>2</sub>), 20.8, 20.8, 20.7, 20.6, 20.6, 20.6, 20.5 (7xs, COCH<sub>3</sub>).

**m/z** (ESI<sup>+</sup> HRMS) for C<sub>117</sub>H<sub>171</sub>N<sub>13</sub>O<sub>67</sub> = 1416.0259 [M+2H]<sup>2+</sup>, found 1416.0296, 1438.0079 [M+2Na]<sup>2+</sup>, found 1438.0117.

**GPC measurements** (THF): M<sub>w</sub> = 1776 ; M<sub>n</sub> = 1671 , PDI (M<sub>w</sub>/M<sub>n</sub>) = 1.063

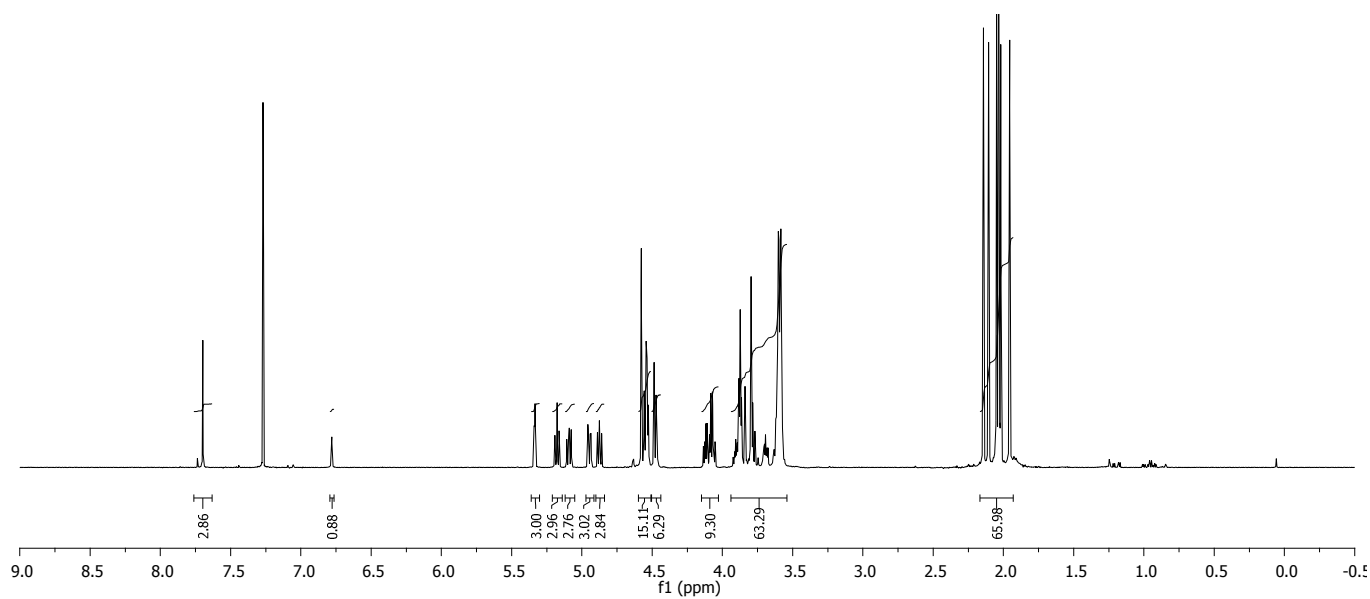

Figure S46.  $^1\text{H}$  NMR spectrum of compound **14** ( $\text{CDCl}_3$ , 600MHz)

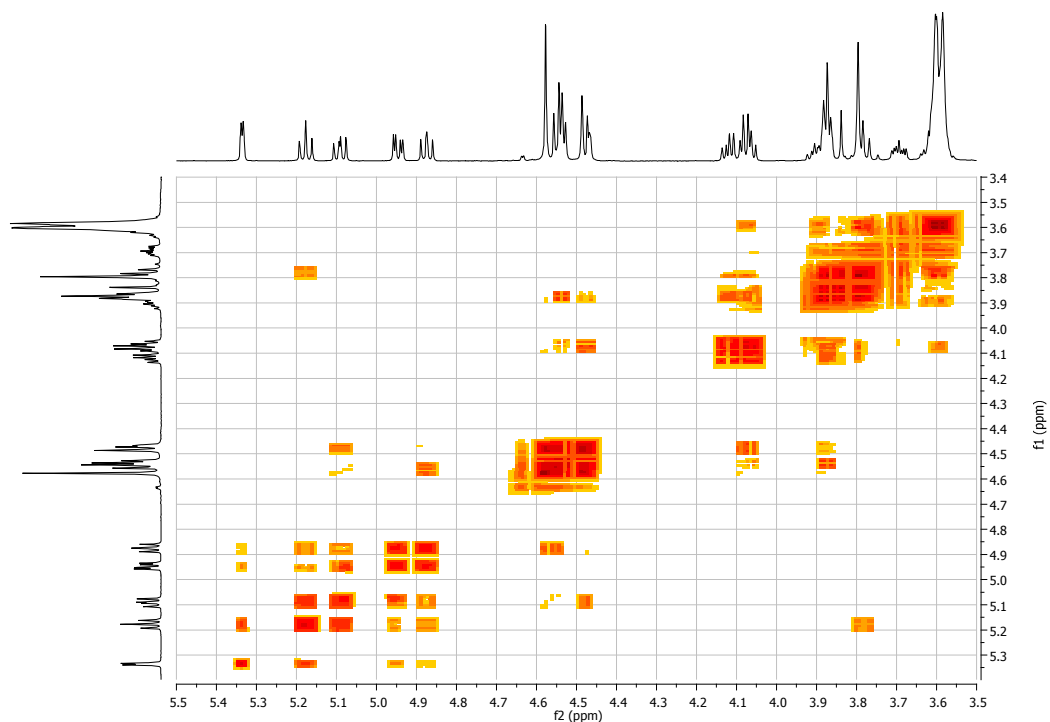

Figure S47. gCOSY spectrum of compound **14**

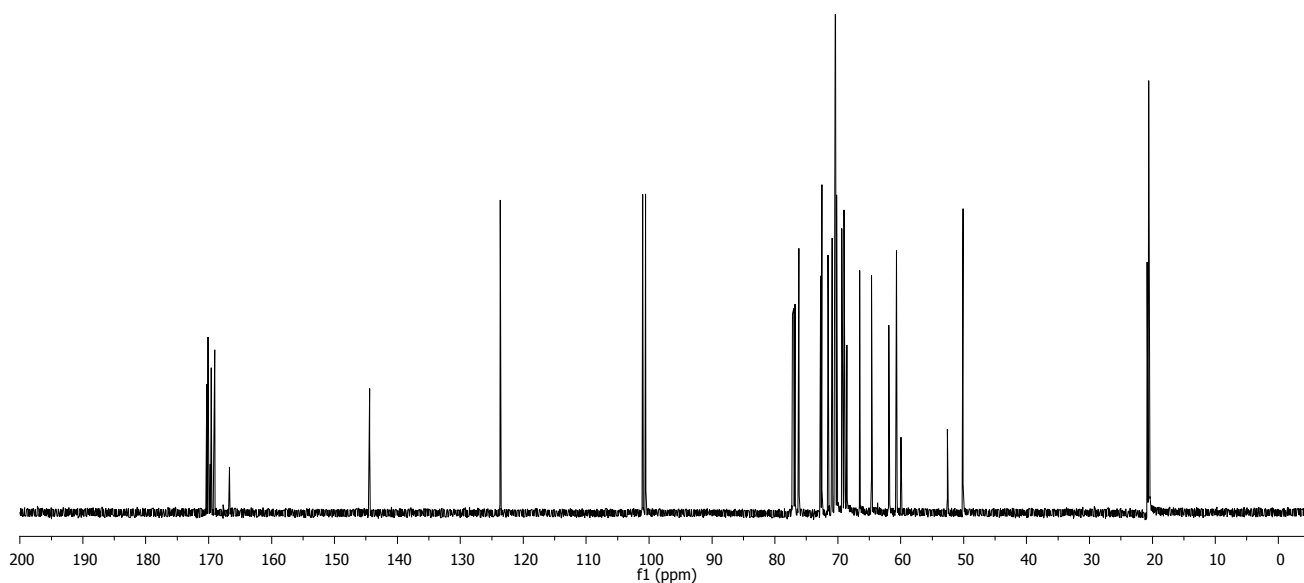

Figure S48.  $^{13}\text{C}$  NMR spectrum of compound **14** ( $\text{CDCl}_3$ , 150MHz)

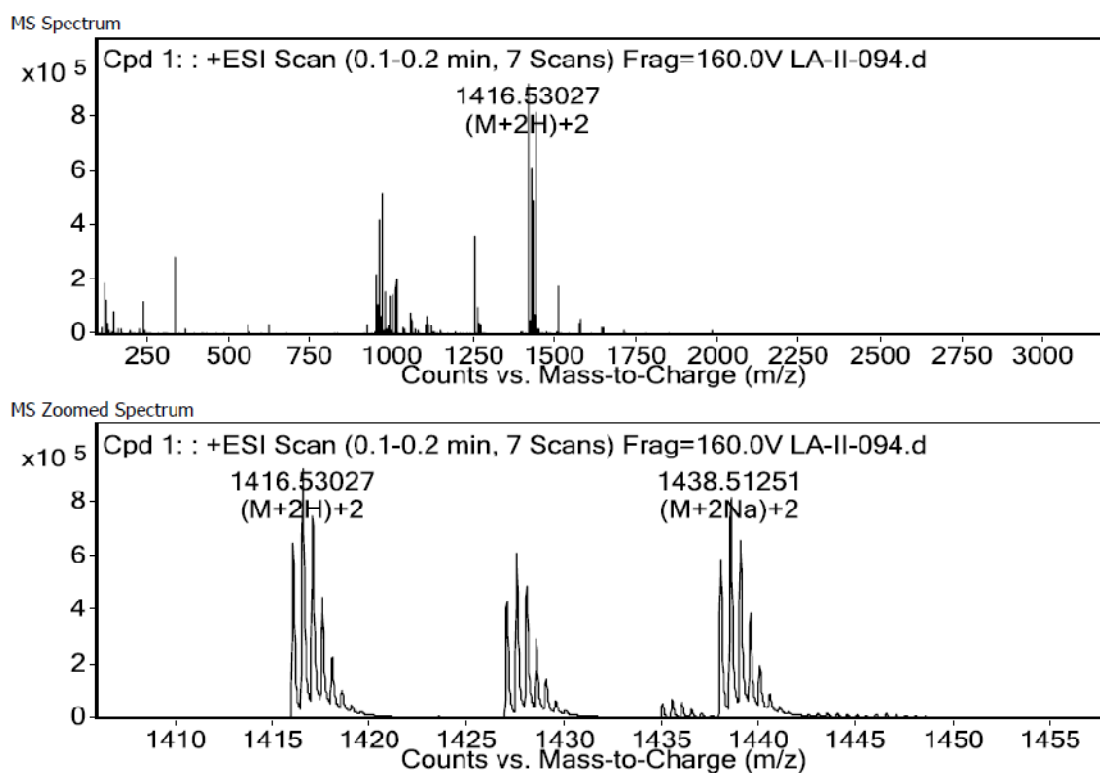

MS Spectrum Peak List

| Ion                    | Ion Formula                                                                       | Abund    | Expe. m/z  | Calc. m/z  | Diff(ppm) |
|------------------------|-----------------------------------------------------------------------------------|----------|------------|------------|-----------|
| (M+2H) <sup>+</sup> 2  | C <sub>117</sub> H <sub>173</sub> N <sub>13</sub> O <sub>67</sub>                 | 653497.1 | 1416.02959 | 1416.02594 | 2.58      |
| (M+2Na) <sup>+</sup> 2 | C <sub>117</sub> H <sub>171</sub> N <sub>13</sub> Na <sub>2</sub> O <sub>67</sub> | 586370.6 | 1438.01167 | 1438.00788 | 2.63      |

Figure S49. ESI<sup>+</sup>-HRMS spectrum of compound **14**



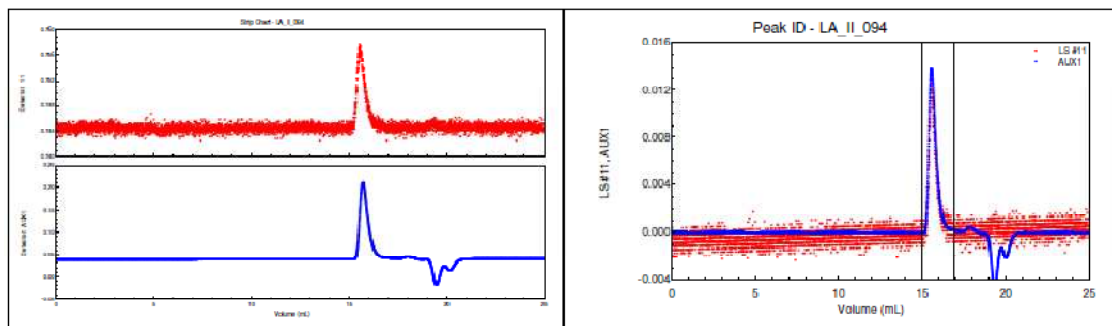

**Polydispersity(Mw/Mn)** : 1.063±0.172 (16%)  
**Polydispersity(Mz/Mn)** : 1.662±1.065 (64%)

**Molar Mass Moments (g/mol)**  
**Mn** : 1.671e+03 (9%)  
**Mw** : 1.776e+03 (12%)  
**Mz** : 2.777e+03 (63%)

**Figure S50.** GPC trace (in THF) of compound **14**

## Pentavalent dendron 15

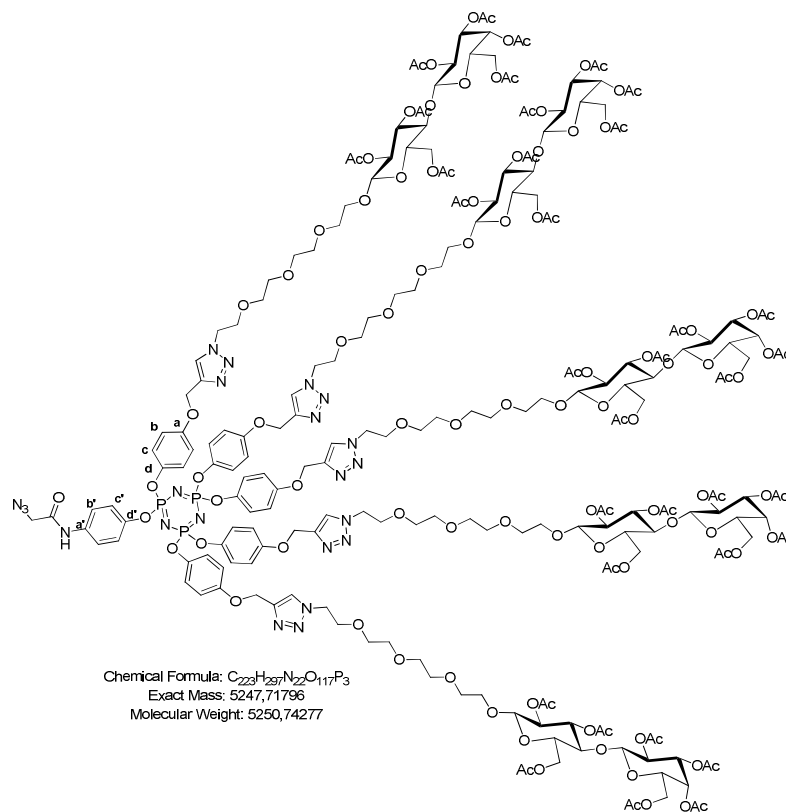

To a stirring solution of **13** (224.7 mg, 0.043 mmol, 1.0 eq) in dry DMF (3 mL) under a nitrogen atmosphere were added sodium azide (8.4 mg, 0.129 mmol, 3.0 eq.) and sodium iodide (1.3 mg, 0.009 mmol, 0.2 eq.). After stirring overnight (15 h) at 70°C, the solvent was removed and EtOAc was added, then the solution was washed successively with water (4×50 mL) and brine (3×25 mL). The organic phase was then dried over Na<sub>2</sub>SO<sub>4</sub> and concentrated under reduced pressure. Column chromatography on silica (DCM/MeOH 99:1 to 90:10) afforded the desired compound **15** (209.8 mg, 0.040 mmol, **93%**) as a colorless oil.

$R_f$  = 0.59, DCM/MeOH 90:10

**<sup>1</sup>H NMR** (600 MHz, CDCl<sub>3</sub>, δ ppm): 9.43 (s, 1H, NH), 7.88 (s, 2H,  $H_{\text{triazole}}$ ), 7.82 (2xs, 3H,  $H_{\text{triazole}}$ ), 7.32 (d, <sup>3</sup>J = 8.6 Hz, 2H,  $CH_b$ ), 6.91-6.75 (m, 20H,  $CH_b$ ,  $CH_c$ ), 6.53 (d, <sup>3</sup>J = 8.6 Hz, 2H,  $CH_c$ ), 5.30 (d<sub>app</sub>, 5H,  $H_{4\text{gal}}$ ), 5.16-5.04 (m, 20H,  $H_{3\text{glc}}$ ,  $C_qCH_2O$ ,  $H_{2\text{gal}}$ ), 4.91 (dd, <sup>3</sup>J<sub>2,3</sub> = 2.3 Hz, <sup>3</sup>J<sub>3,4</sub> = 3.5 Hz, 5H,  $H_{3\text{gal}}$ ), 4.84 (t<sub>app</sub>, 5H,  $H_{2\text{glc}}$ ), 4.53-4.45 (m, 25H,  $CH_2N$ ,  $H_{1\text{glc}}$ ,  $H_{6\text{aglc}}$ ,  $H_{1\text{gal}}$ ), 4.10-4.02 (m, 17H,  $CH_2N_3$ ,  $H_{6\text{bglc}}$ ,  $H_{6\text{agal}}$ ,  $H_{6\text{bgal}}$ ), 3.86-3.54 (m, 85H,  $H_{5\text{gal}}$ ,  $H_{5\text{glc}}$ ,  $H_{4\text{glc}}$ ,  $OCH_2$ ), 2.17-1.92 (m, 105H,  $COCH_3$ ).

**<sup>13</sup>C NMR** (150 MHz, CDCl<sub>3</sub>, δ ppm): 170.2, 170.2, 170.0, 169.9, 169.6, 169.5, 169.0 (7xs,  $COCH_3$ ), 165.8 (C=O), 155.2 + 155.2 ( $C_a$ ), 146.6 ( $C_d'$ ), 144.5 ( $C_d$ ), 144.4 ( $C_d$ ), 143.5 ( $C_{\text{triazole}}$ ), 143.3 ( $C_{\text{triazole}}$ ), 134.5 ( $C_a'$ ), 124.4 ( $CH_{\text{triazole}}$ ), 124.0 ( $CH_{\text{triazole}}$ ), 121.9 ( $C_c$ ), 121.8 ( $C_c$ ), 121.7 ( $C_b'$ ), 121.6 ( $C_c'$ ), 120.9 ( $C_c'$ ), 120.9 ( $C_c'$ ), 120.7 ( $C_c'$ ), 115.2 ( $C_b$ ), 115.0 ( $C_b$ ), 100.9 ( $C_{1\text{gal}}$ ), 100.4 ( $C_{1\text{glc}}$ ), 76.1 ( $C_{4\text{glc}}$ ), 72.6 ( $C_{3\text{glc}}$ ), 72.5 ( $C_{5\text{glc}}$ ), 72.4 ( $C_{2\text{glc}}$ ), 71.5 ( $C_{3\text{gal}}$ ), 70.8 ( $C_{5\text{gal}}$ ), 70.5, 70.4,

70.4, 70.3, 70.3, 70.3, 70.1, 70.1, 69.2, 69.2 (OCH<sub>2</sub>), 68.9 (C<sub>2gal</sub>), 68.9 (OCH<sub>2</sub>), 66.5 (C<sub>4gal</sub>), 62.1 (OCH<sub>2</sub>C=C), 61.8 (C<sub>6glc</sub>), 61.6 (C<sub>6gal</sub>), 60.6, 52.3 (CH<sub>2</sub>N<sub>3</sub>), 50.2 (NCH<sub>2</sub>), 50.1 (NCH<sub>2</sub>), 20.7, 20.7, 20.6, 20.5, 20.5, 20.4 (COCH<sub>3</sub>).

<sup>31</sup>P NMR (122 MHz, CDCl<sub>3</sub>, δ ppm): 10.3-9.4 (m, 3P).

IR (neat, ν cm<sup>-1</sup>) 2882 (m), 2113 (w, N<sub>3</sub>), 1740 (s), 1502 (m), 1366 (m), 1216 (s), 1041 (m), 833 (w)

*m/z* (ESI<sup>+</sup>-HRMS) for C<sub>223</sub>H<sub>297</sub>N<sub>22</sub>O<sub>117</sub>P<sub>3</sub> = 1750.2466 [M+3H]<sup>3+</sup>; found 1750.2448, 1772.2285 [M+3Na]<sup>3+</sup>, found 1772.2226.

NMR diffusion studies (CDCl<sub>3</sub>): *D* = 3.10×10<sup>-10</sup> m<sup>2</sup>/s; *d<sub>s</sub>* = 2.6 nm

GPC measurements (THF): *M<sub>w</sub>* = 5462 ; *M<sub>n</sub>* = 5367 , PDI (*M<sub>w</sub>*/*M<sub>n</sub>*) = 1.018

(CHCl<sub>3</sub>/Et<sub>3</sub>N (1%)): *M<sub>w</sub>* = 4784 ; *M<sub>n</sub>* = 4609 , PDI (*M<sub>w</sub>*/*M<sub>n</sub>*) = 1.038

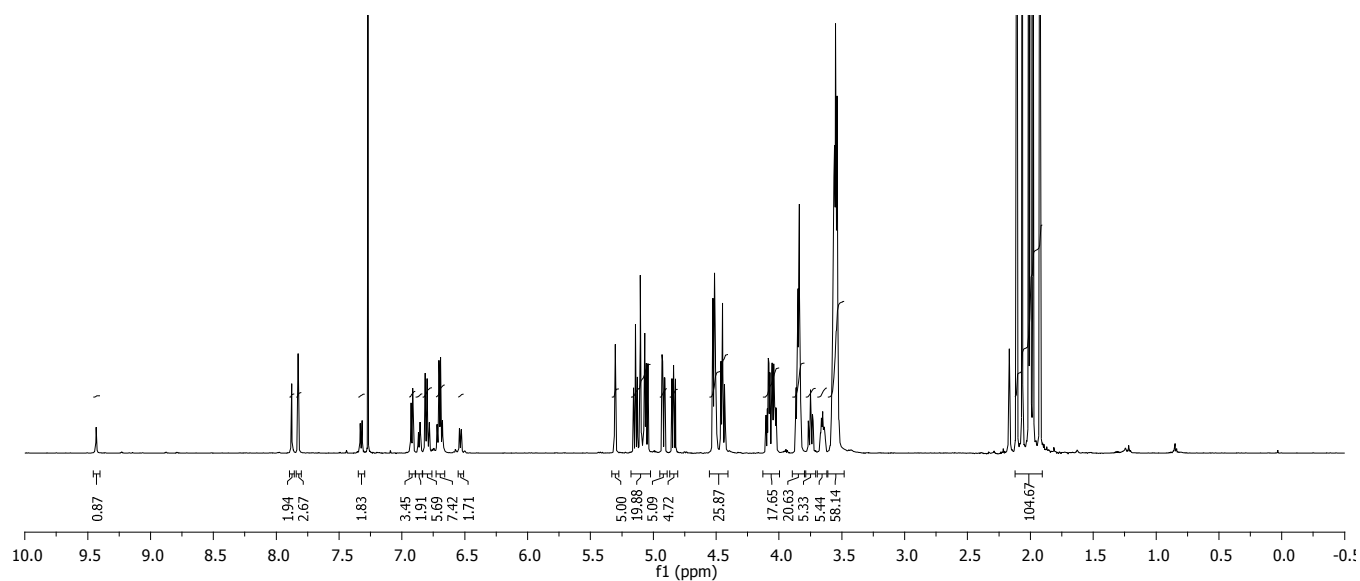

Figure S51. <sup>1</sup>H NMR spectrum of compound **15** (CDCl<sub>3</sub>, 600MHz)

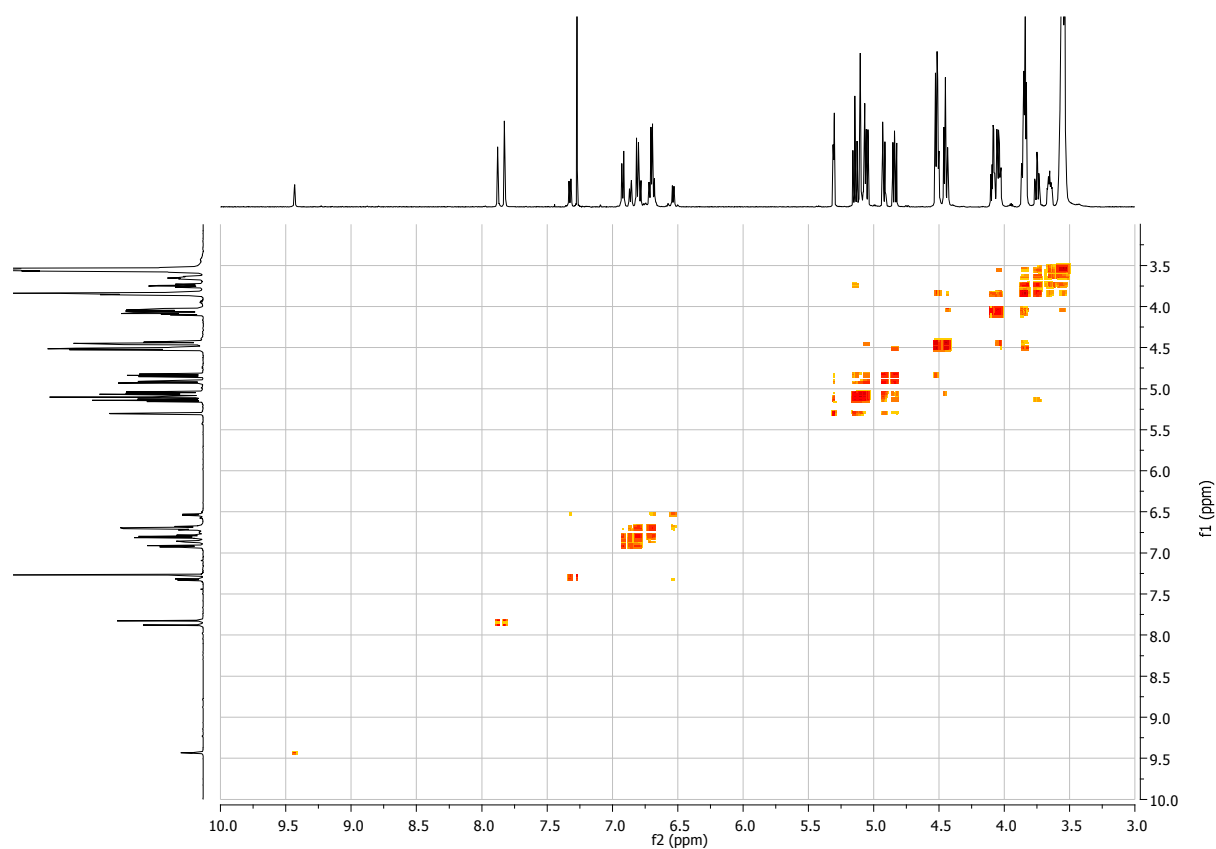

Figure S52. gCOSY spectrum of compound **15**

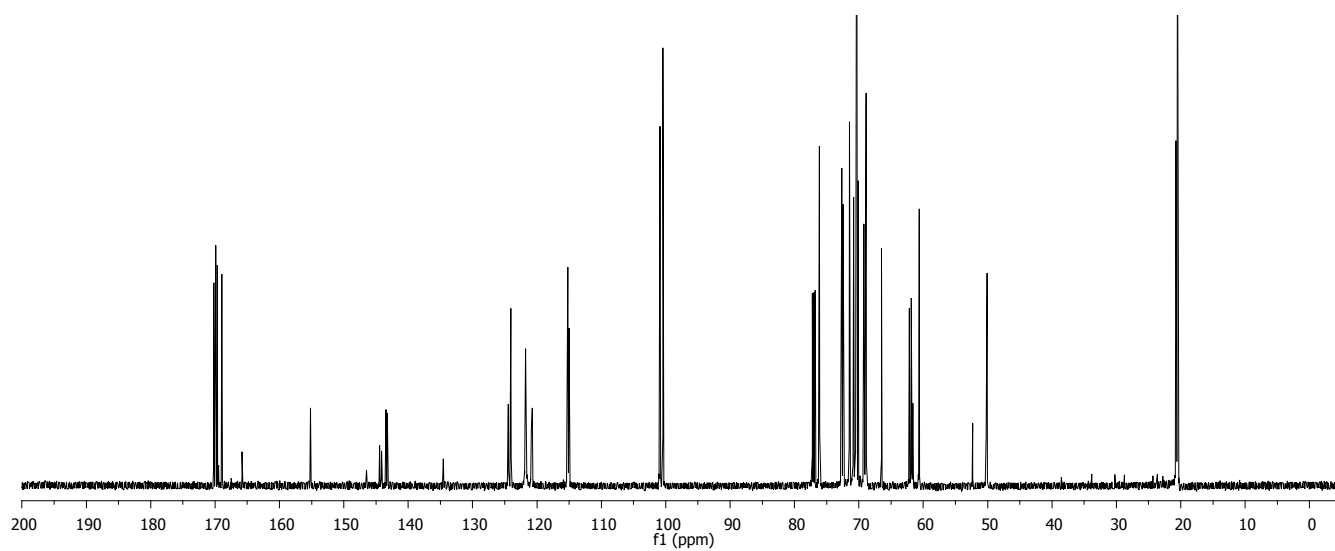

Figure S53.  $^{13}\text{C}$  NMR spectrum of compound **15** ( $\text{CDCl}_3$ , 150MHz)

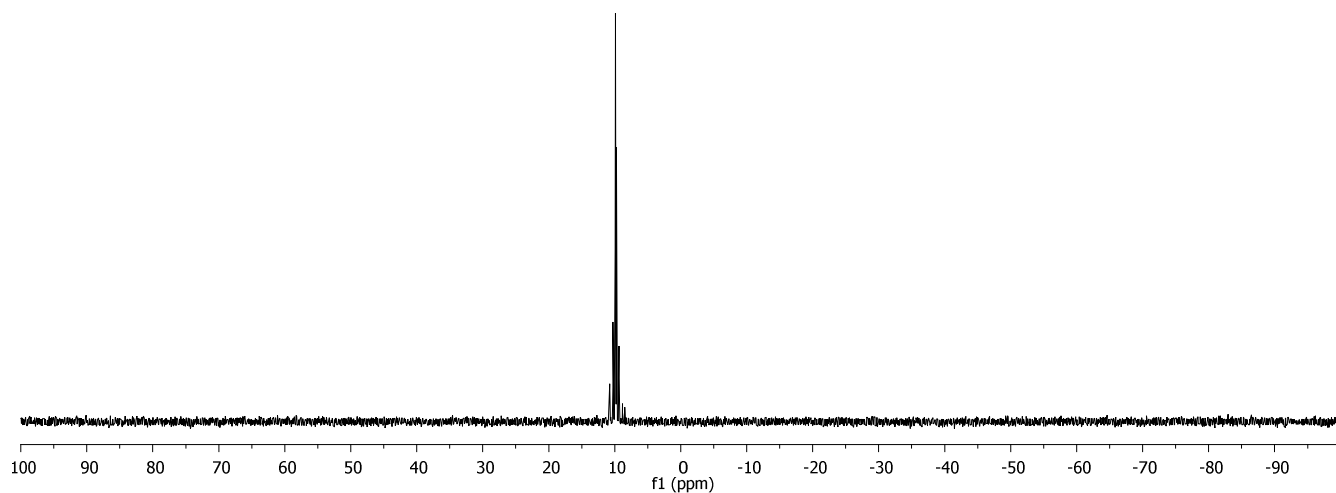

Figure S54.  $^{31}\text{P}$  NMR spectrum of compound **15** ( $\text{CDCl}_3$ , 122MHz)

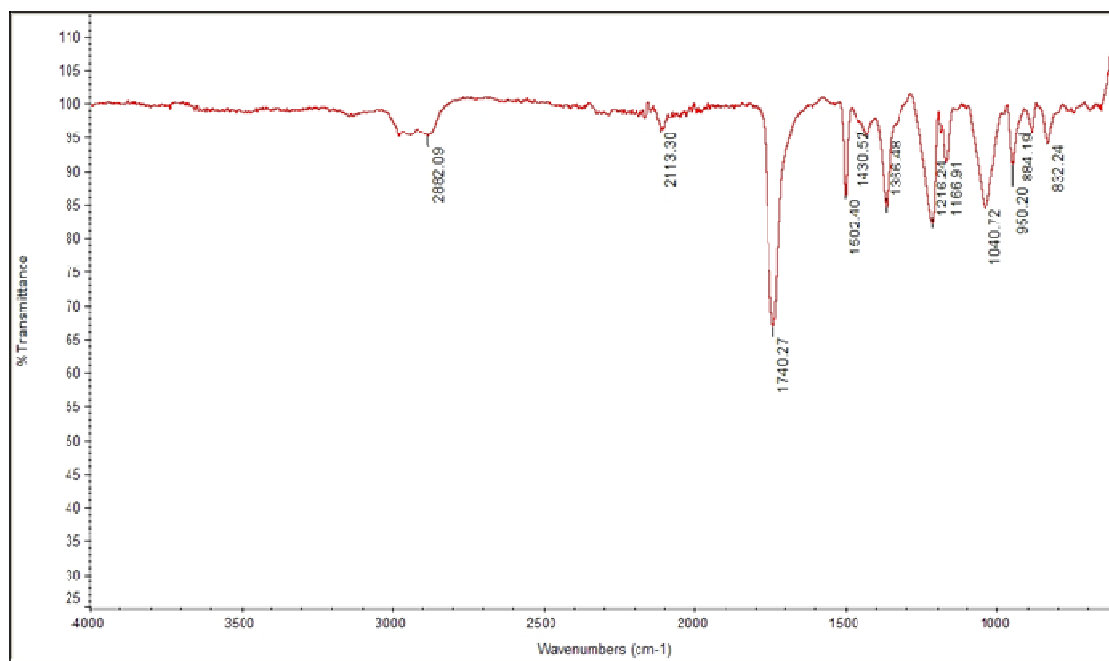

Figure S55. FT-IR spectrum of compound **15**

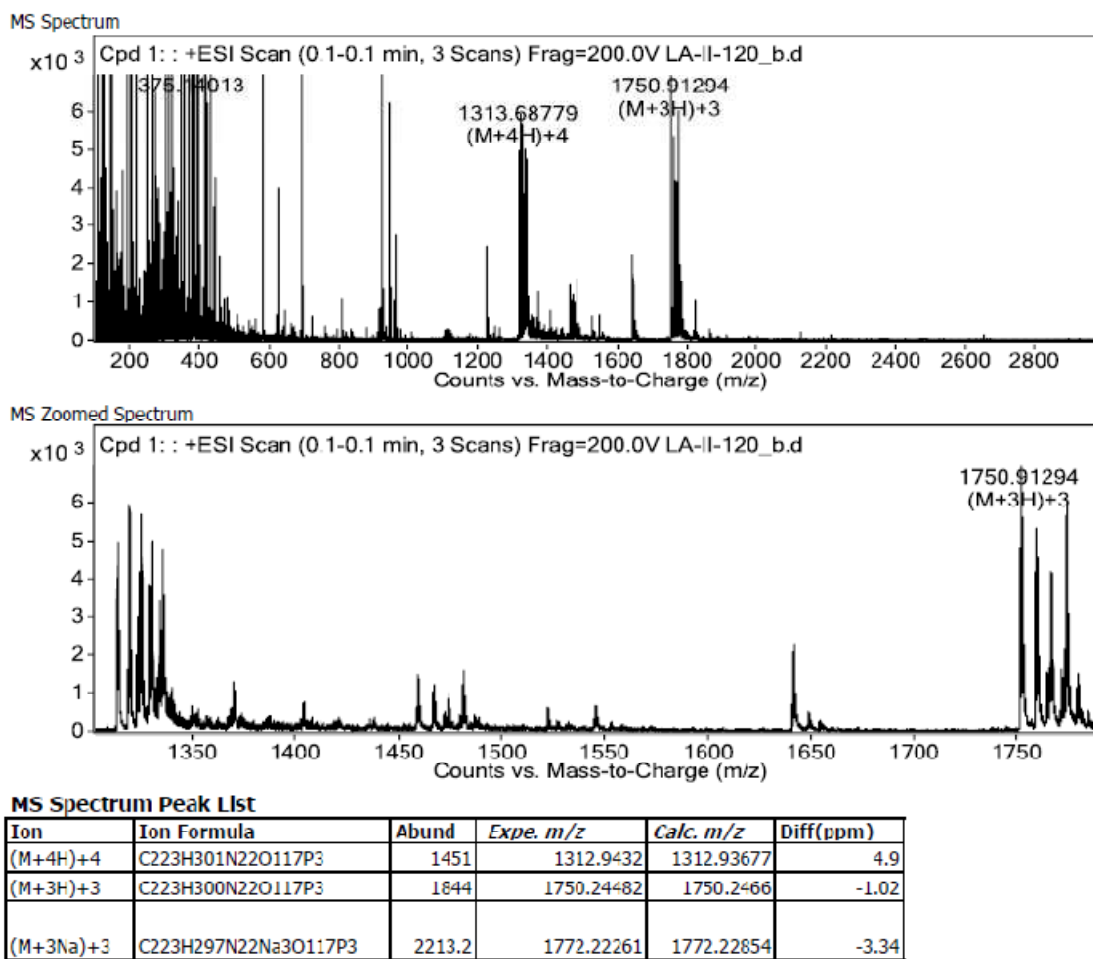

Figure S56. ESI<sup>+</sup>-HRMS spectrum of compound 15

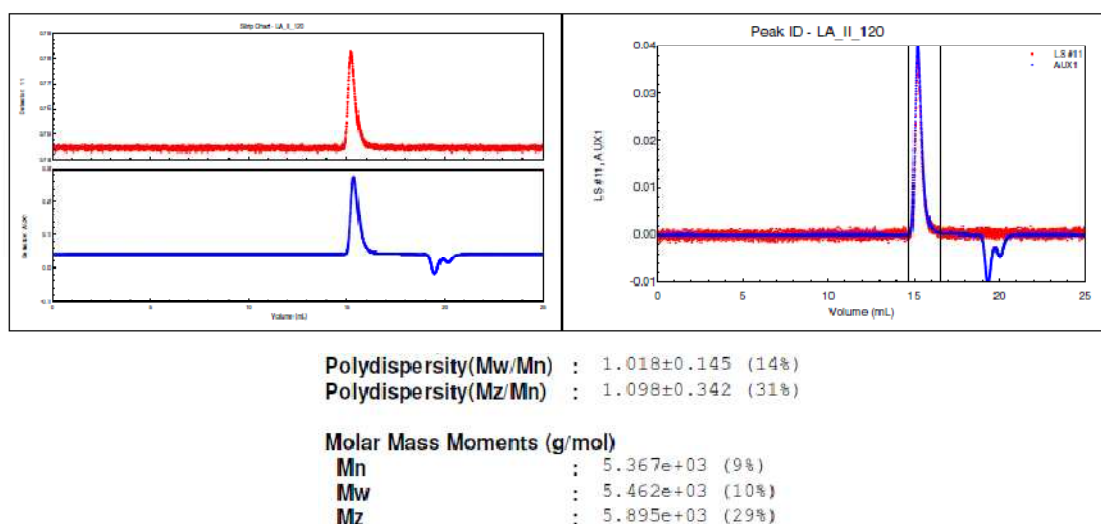

Figure S57. GPC trace (in THF) of compound 15

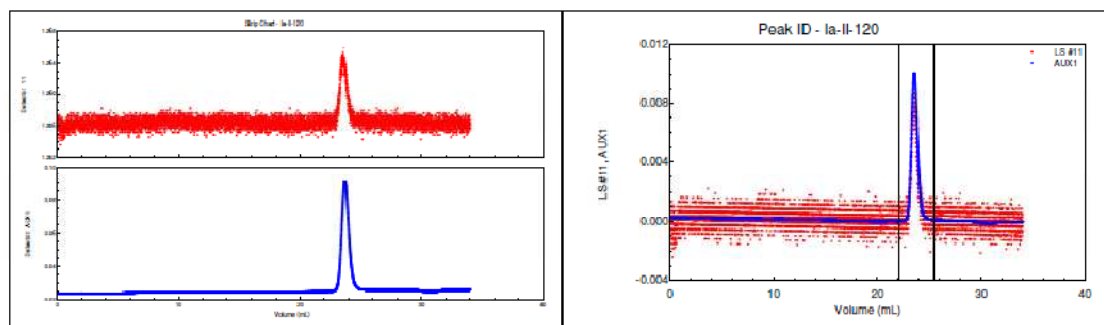

Polydispersity(Mw/Mn) : 1.038±0.192 (18%)  
 Polydispersity(Mz/Mn) : 1.228±0.562 (46%)

**Molar Mass Moments (g/mol)**  
 Mn : 4.609e+03 (12%)  
 Mw : 4.784e+03 (13%)  
 Mz : 5.659e+03 (44%)

**Figure S58.** GPC trace (in CHCl<sub>3</sub>/Et<sub>3</sub>N (1%)) of compound **15**

## Protected hexavalent glycocluster 16

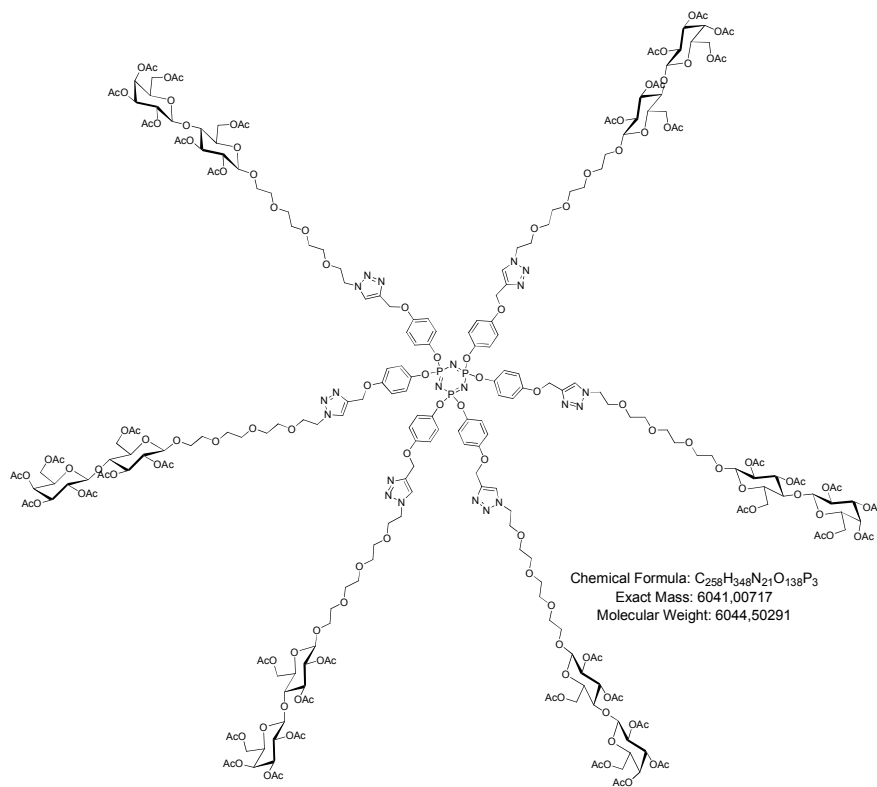

To a solution of propargylated derivative **1** (13.5 mg, 0.013 mmol, 1.0 eq.) in a 1:1 mixture of H<sub>2</sub>O/THF (5 mL), were added azido derivative **10** (95.6 mg, 0.114 mmol, 8.8 eq.), CuSO<sub>4</sub>·5H<sub>2</sub>O (26.9 mg, 0.101 mmol, 7.8 eq.) and sodium ascorbate (22.1 mg, 0.111 mmol, 8.6 eq.). While stirring, the mixture was first heated at 50°C for 3 hours in a 20 mL vial and at room temperature for additional 18 hours. Ethyl acetate (15 mL) was added and the solution was poured into a separatory funnel containing ethyl acetate (10 mL), washed with saturated aqueous NH<sub>4</sub>Cl (2×10 mL), water (10 mL) and brine (5 mL). Organics were collected, dried over Na<sub>2</sub>SO<sub>4</sub> and concentrated to dryness with rotary evaporator. Purification by flash chromatography (SiO<sub>2</sub>, DCM/MeOH 99:1 to 96:4) afforded desired multivalent compound **16** (67 mg, 0.011 mmol, **84%**).

R<sub>f</sub> = 0.42, DCM/MeOH 95:5.

<sup>1</sup>H NMR (600 MHz, CDCl<sub>3</sub>, δ ppm): 7.82 (s, 6H, H<sub>triazole</sub>), 6.79 (d, <sup>3</sup>J = 8.9 Hz, 12H, CH<sub>b</sub>), 6.75 (d, <sup>3</sup>J = 8.9 Hz, 12H, CH<sub>c</sub>), 5.30 (d<sub>app</sub>, 6H, H<sub>4gal</sub>), 5.14 (dd, <sup>3</sup>J<sub>4,3</sub> = 9.4 Hz, <sup>3</sup>J<sub>3,2</sub> = 9.1 Hz, 3H, H<sub>3glc</sub>), 5.09-5.04 (m, 18H, C<sub>q</sub>CH<sub>2</sub>O, H<sub>2gal</sub>), 4.91 (dd, <sup>3</sup>J<sub>2,3</sub> = 7.1 Hz, <sup>3</sup>J<sub>3,4</sub> = 3.3 Hz, 6H, H<sub>3gal</sub>), 4.84 (t<sub>app</sub>, 6H, H<sub>2glc</sub>), 4.53-4.43 (m, 30H, CH<sub>2</sub>N, H<sub>1glc</sub>, H<sub>6aglc</sub>, H<sub>1gal</sub>), 4.08-4.03 (m, 18H, H<sub>6bglc</sub>, H<sub>6agal</sub>, H<sub>6bgal</sub>), 3.86-3.83 (m, 24H, OCH<sub>2</sub>CH<sub>2</sub>N, LacOCH<sub>2</sub>), 3.75 (t<sub>app</sub>, 6H, H<sub>4glc</sub>), 3.60-3.53 (m, 72H, OCH<sub>2</sub>, H<sub>5gal</sub>, H<sub>5glc</sub>), 2.11-1.92 (7xs, 126H, COCH<sub>3</sub>).

<sup>13</sup>C NMR (150 MHz, CDCl<sub>3</sub>, δ ppm): 170.5, 170.5, 170.3, 170.2, 170.0, 169.8, 169.3 (7s, COCH<sub>3</sub>), 155.5 (C<sub>a</sub>), 144.7 (C<sub>d</sub>), 143.7 (C<sub>triazole</sub>=CH), 124.4 (C<sub>triazole</sub>=CH), 122.0 (C<sub>c</sub>), 115.5 (C<sub>b</sub>), 101.2 (C<sub>1gal</sub>), 100.8 (C<sub>1glc</sub>), 76.5 (C<sub>4glc</sub>), 73.0 (C<sub>3glc</sub>), 72.8 (C<sub>5glc</sub>), 71.8 (C<sub>2glc</sub>), 71.2 (C<sub>3gal</sub>), 70.8 (C<sub>5gal</sub>), 70.8, 70.7, 70.6, 70.4, 69.6 (OCH<sub>2</sub>), 69.3 (C<sub>2gal</sub>), 69.2 (OCH<sub>2</sub>),



66.8 ( $C_{4gal}$ ), 62.4 ( $OCH_2C=C$ ), 62.2 ( $C_{6glc}$ ), 61.0 ( $C_{6gal}$ ), 50.4 ( $NCH_2$ ), 21.1, 21.0, 20.9, 20.8, 20.8, 20.8, 20.7 (7xs,  $COCH_3$ ).

$^{31}P$  NMR (122 MHz,  $CDCl_3$ ,  $\delta$  ppm): 9.7 (s, 3P).

$m/z$  (ESI<sup>+</sup>-HRMS) for  $C_{258}H_{348}N_{21}O_{138}P_3 = 1511.5099 [M+4H]^{4+}$ ; found 1511.5123, 1533.2410  $[M+4Na]^{4+}$ , found 1533.2391.

NMR diffusion studies ( $CDCl_3$ ):  $D = 2.76 \times 10^{-10} m^2/s$ ;  $d_s = 2.9$  nm.

GPC measurements (THF):  $M_w = 6882$ ;  $M_n = 6764$ , PDI ( $M_w/M_n$ ) = 1.017.

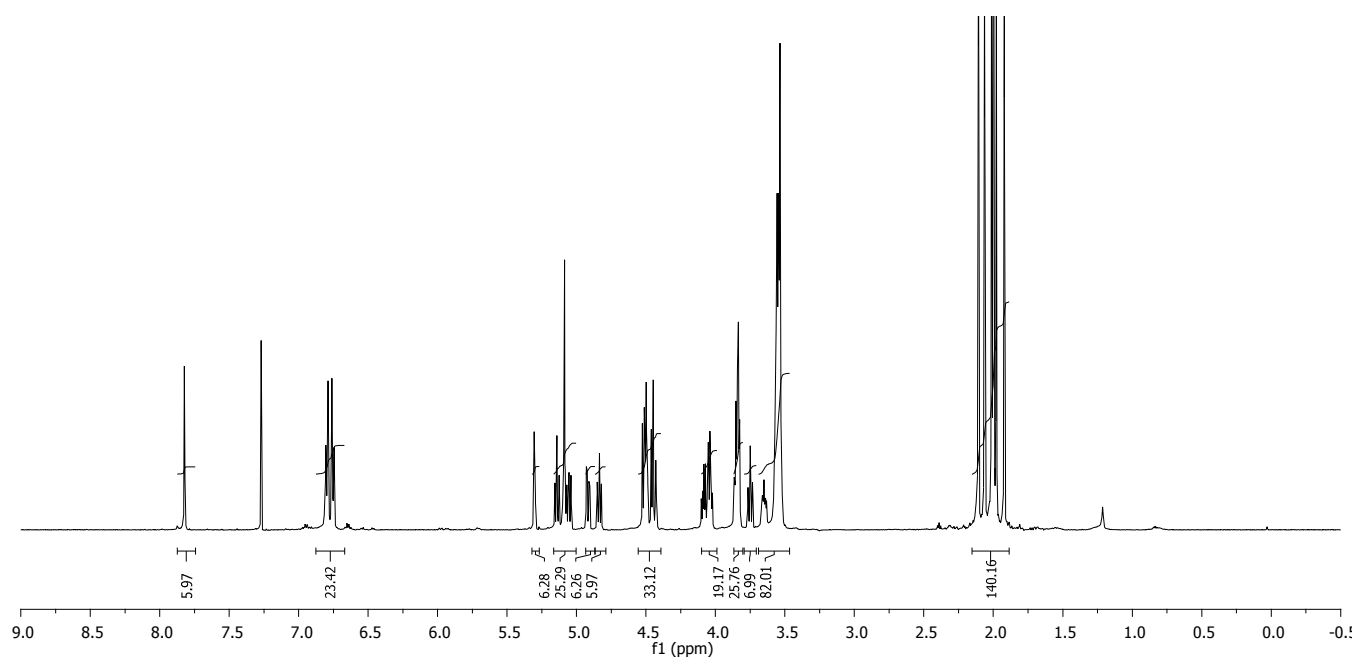

Figure S59.  $^1H$  NMR spectrum of compound **16** ( $CDCl_3$ , 600MHz)

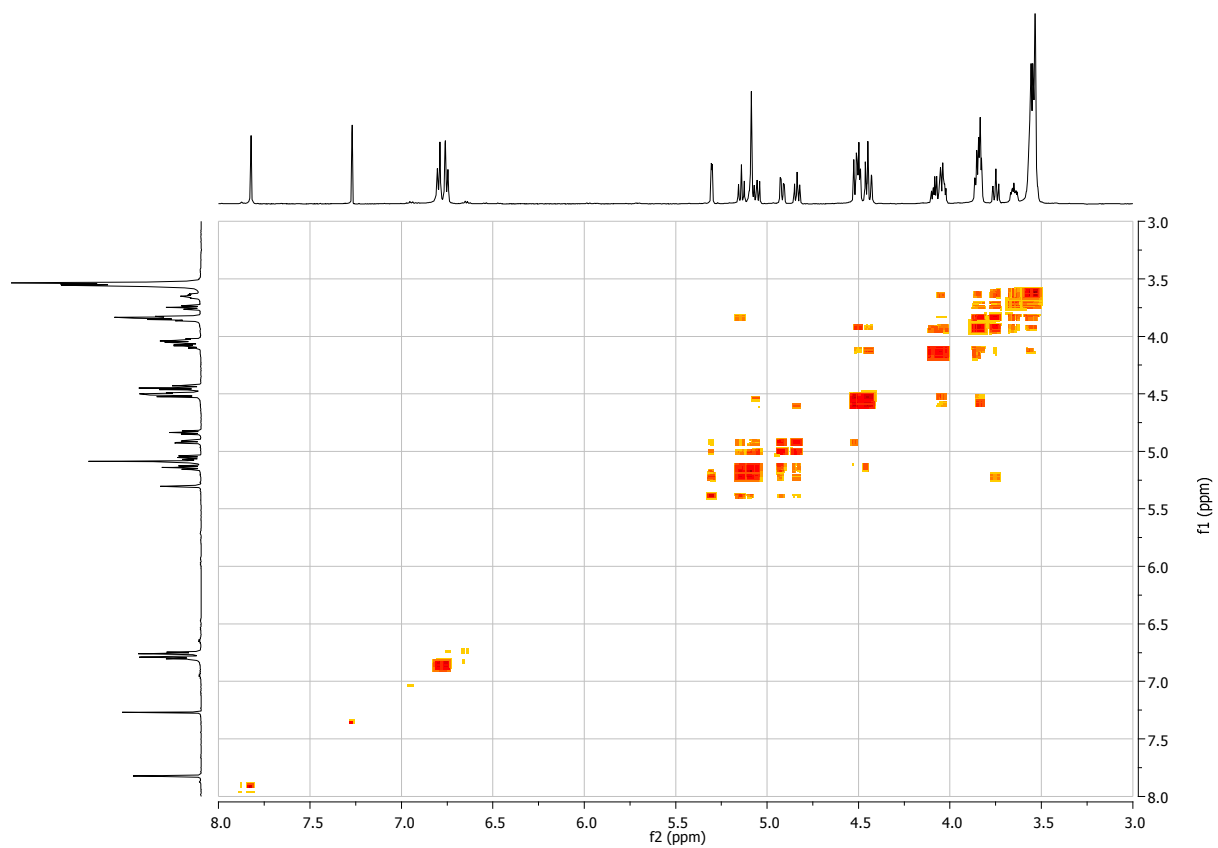

Figure S60. gCOSY spectrum of compound **16**

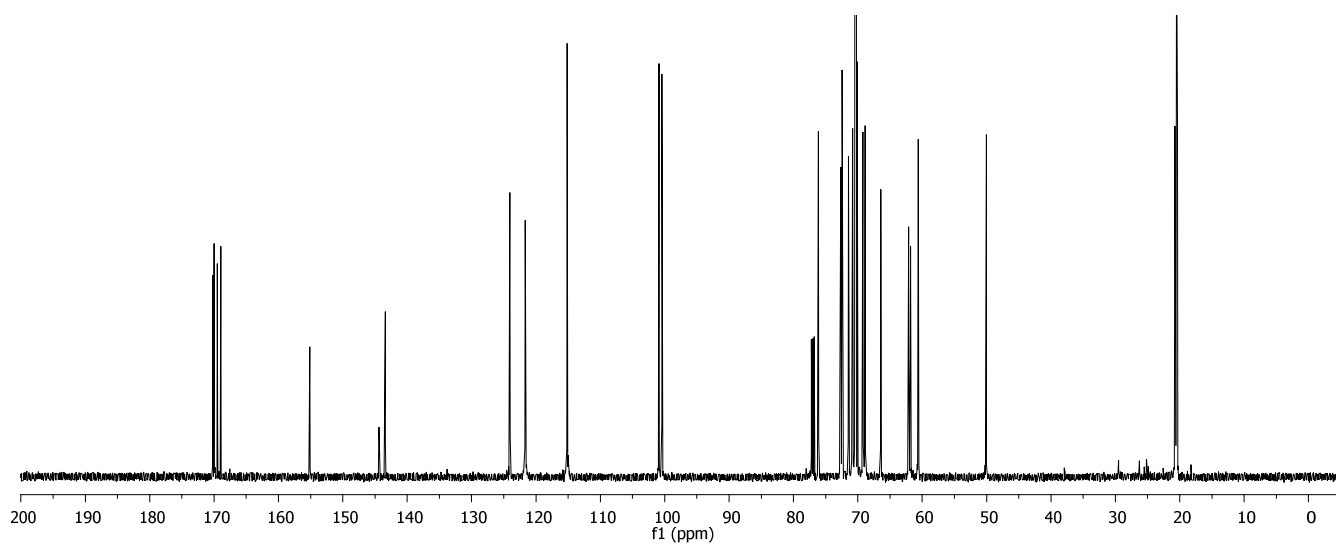

Figure S61.  $^{13}\text{C}$  NMR spectrum of compound **16** ( $\text{CDCl}_3$ , 150MHz)

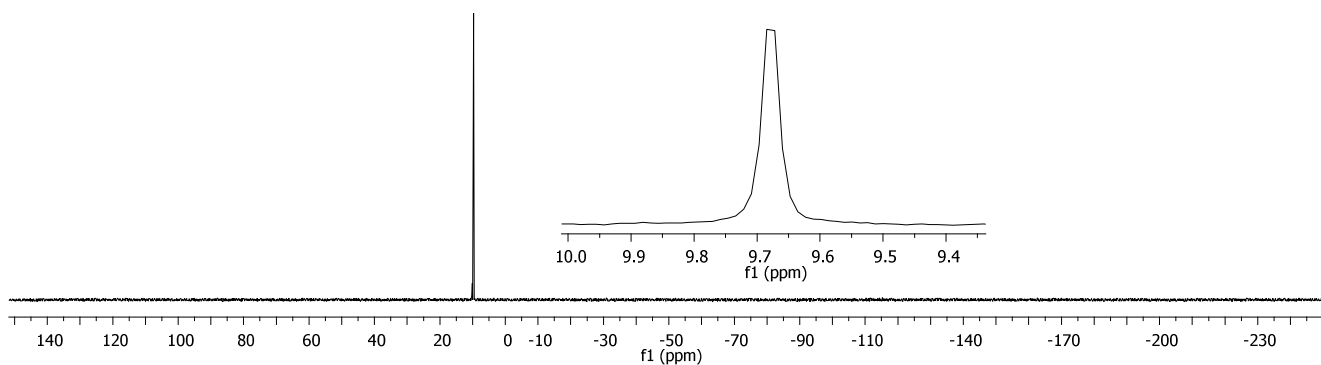

Figure S62.  $^{31}\text{P}$  NMR spectrum of compound **16** ( $\text{CDCl}_3$ , 122MHz)

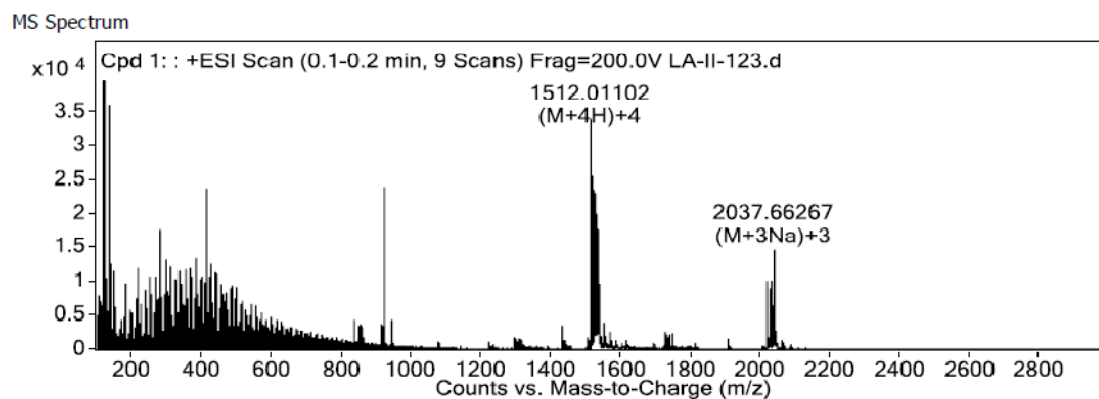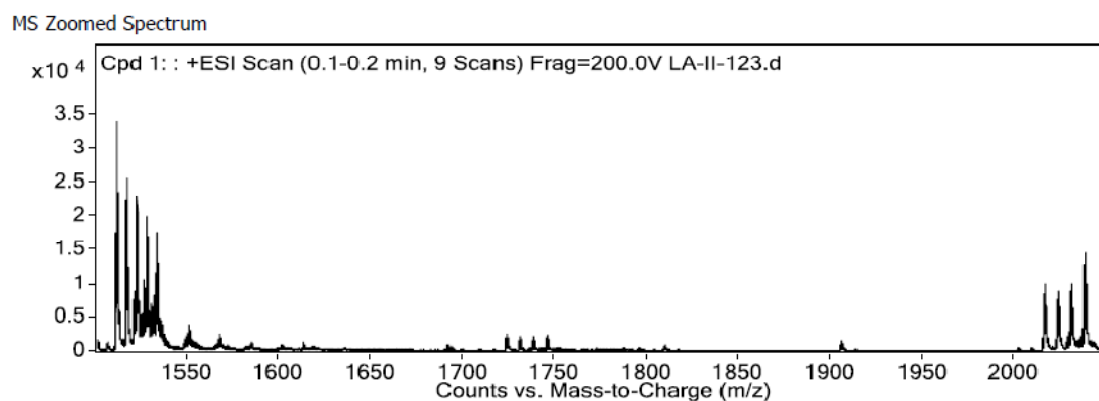

**MS Spectrum Peak List**

| Ion       | Formula                                                                                           | Abund   | Observed m/z | Calc m/z   | Diff(ppm) |
|-----------|---------------------------------------------------------------------------------------------------|---------|--------------|------------|-----------|
| (M+4H)+4  | C <sub>258</sub> H <sub>352</sub> N <sub>21</sub> O <sub>138</sub> P <sub>3</sub>                 | 17753.4 | 1511.51226   | 1511.50988 | -2.38     |
| (M+4Na)+4 | C <sub>258</sub> H <sub>348</sub> N <sub>21</sub> Na <sub>4</sub> O <sub>138</sub> P <sub>3</sub> | 7228.1  | 1533.23912   | 1533.24101 | 1.89      |
| (M+3Na)+3 | C <sub>258</sub> H <sub>348</sub> N <sub>21</sub> Na <sub>3</sub> O <sub>138</sub> P <sub>3</sub> | 3659.9  | 2036.6626    | 2036.65828 | -4.33     |

Figure S63. ESI<sup>+</sup>-HRMS spectrum of compound **16**

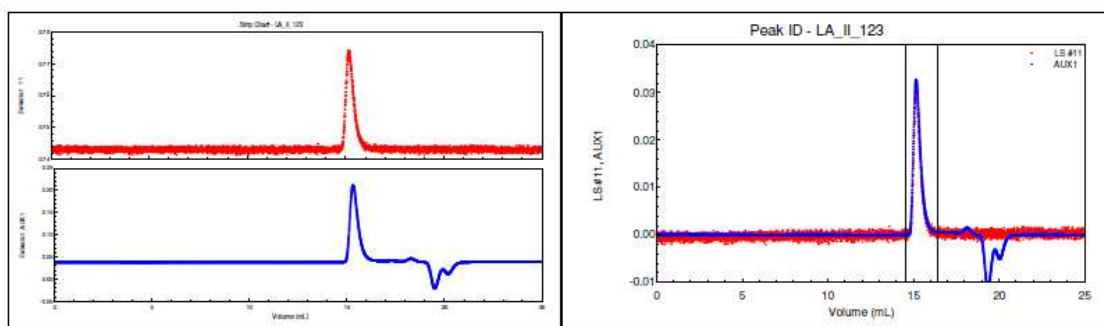

Polydispersity(Mw/Mn) : 1.017±0.144 (14%)  
 Polydispersity(Mz/Mn) : 1.241±0.576 (46%)

**Molar Mass Moments (g/mol)**  
 Mn : 6.764e+03 (9%)  
 Mw : 6.882e+03 (10%)  
 Mz : 8.392e+03 (45%)

**Figure S64.** GPC trace (in THF) of compound **16**

## Protected octadecaivalent dendrimer **17**

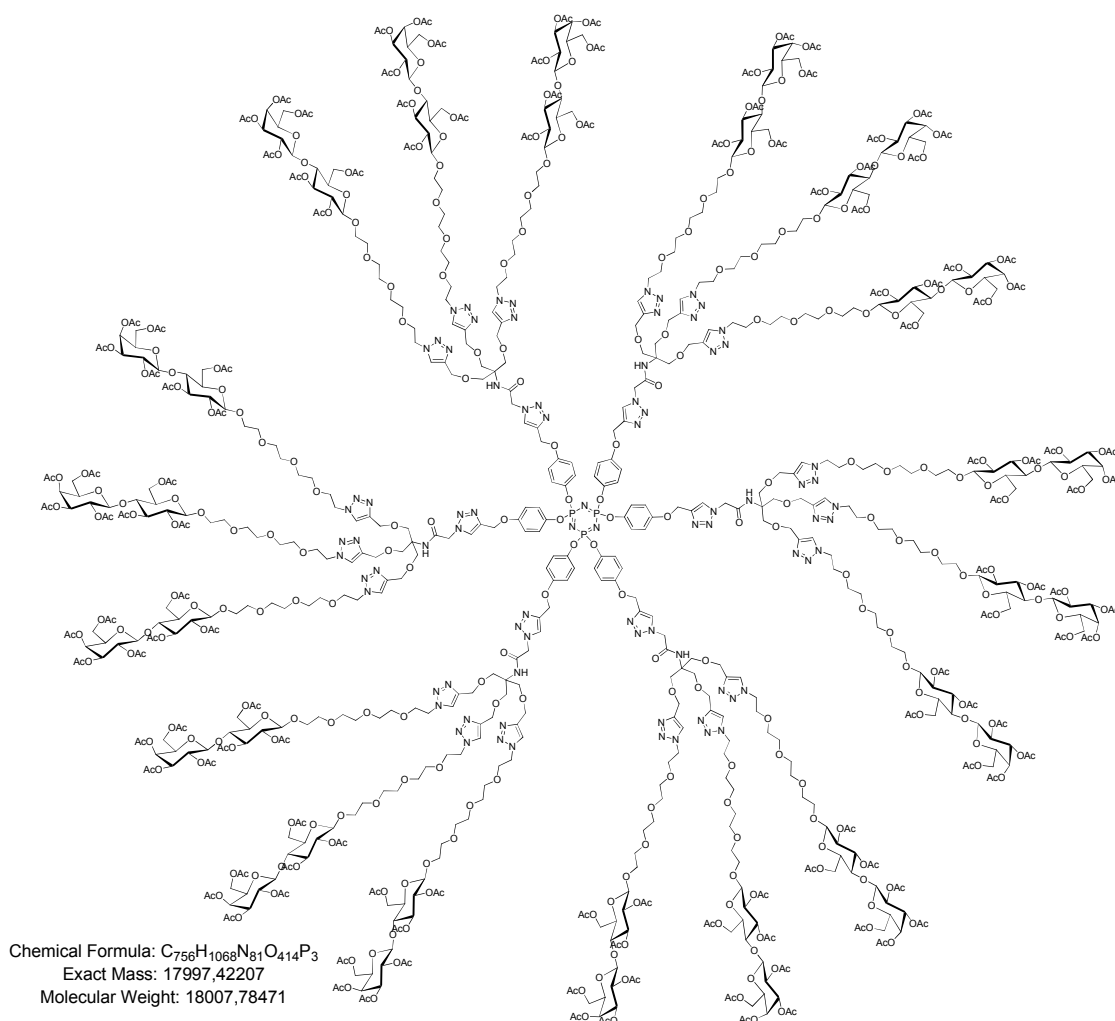

To a solution of hexapropargylated cyclotriphosphazene derivative **1** (6.91 mg, 6.79  $\mu\text{mol}$ , 1.0 eq.) in a 1:1 mixture of  $\text{H}_2\text{O}/\text{THF}_{\text{anh}}$  (5 mL), were added azido derivative **14** (150 mg, 53.0  $\mu\text{mol}$ , 7.8 eq.),  $\text{CuSO}_4 \cdot 5\text{H}_2\text{O}$  (13.2 mg, 53.0  $\mu\text{mol}$ , 7.8 eq.) and sodium ascorbate (10.4 mg, 53.0  $\mu\text{mol}$ , 7.8 eq.). While stirring, the mixture was first heated at 50°C for 3 hours in a 20 mL vial and at room temperature for additional 18 hours. Ethyl acetate (30 mL) was added and the solution was poured into a separatory funnel containing ethyl acetate (20 mL), washed with saturated aqueous  $\text{NH}_4\text{Cl}$  (2x20 mL), water (20 mL) and brine (10 mL). Organics were collected, dried over  $\text{Na}_2\text{SO}_4$  and concentrated to dryness *in vacuo* with rotary evaporator. Purification by flash chromatography ( $\text{SiO}_2$ , DCM/MeOH 100:0 to 90:10) afforded desired multivalent compound **17** (79.0 mg, 4.39  $\mu\text{mol}$ , **65%**).

$R_f = 0.28$ , DCM/MeOH 92:8

$^1\text{H NMR}$  (600 MHz,  $\text{CDCl}_3$ ,  $\delta$  ppm): 7.89 (s, 6H,  $H_{\text{int-triazole}}$ ), 7.68 (s, 18H,  $H_{\text{ext-triazole}}$ ), 6.88-6.69 (m, 24H,  $\text{CH}_b$ ,  $\text{CH}_b$ ,  $\text{CH}_c$ ,  $\text{CH}_c$  + NH not visible), 5.30 ( $d_{\text{app}}$ , 18H,  $H_{4\text{gal}}$ ), 5.14 ( $t_{\text{app}}$ , 18H,  $H_{3\text{glc}}$ ), 5.07-5.02 (m, 30H,  $\text{C}_q\text{CH}_2\text{O}$ ,  $H_{2\text{gal}}$ ), 4.91 (dd,  $^3J_{2,3} = 3.4$  Hz,  $^3J_{3,4} = 7.0$  Hz, 18H,  $H_{3\text{gal}}$ ), 4.83 ( $t_{\text{app}}$ , 18H,  $H_{2\text{glc}}$ ), 4.54-4.43 (m, 126H,  $\text{C}_q\text{CH}_2\text{O}$ ,  $\text{OCH}_2\text{CH}_2\text{N}$ ,  $H_{1\text{glc}}$ ,  $H_{6\text{glc}}$ ,  $H_{1\text{gal}}$ ),

4.10-4.02 (m, 54H,  $H_{6\text{bglc}}$ ,  $H_{6\text{agal}}$ ,  $H_{6\text{bgal}}$ ), 3.86-3.53 (m, 354H,  $\text{NHCOCH}_2\text{N}_{\text{triazole}}$ ,  $\text{OCH}_2\text{CH}_2\text{N}$ ,  $H_{5\text{gal}}$ ,  $H_{5\text{glc}}$ ,  $H_{4\text{glc}}$ ,  $\text{OCH}_2$ ,  $\text{HNC}_q\text{CH}_2\text{O}$ ), 2.11-1.92 (m, 378H,  $\text{COCH}_3$ ).

$^{13}\text{C}$  NMR (150 MHz,  $\text{CDCl}_3$ ,  $\delta$  ppm): 170.2, 170.2, 170.0, 169.9, 169.6, 169.5, 168.9 (7xs,  $\text{COCH}_3$ ), 165.1 (CO), 155.2 ( $C_a$ ), 144.2 ( $C_d$ ), 144.2 ( $C_{\text{triazole}=\text{CH}}$ ), 143.3 ( $C_{\text{triazole}=\text{CH}}$ ), 125.2 ( $C_{\text{triazole}=\text{CH}}$ ), 123.7 ( $C_{\text{triazole}=\text{CH}}$ ), 121.6 ( $C_c$ ), 115.1 ( $C_b$ ), 100.9 ( $C_{1\text{gal}}$ ), 100.4 ( $C_{1\text{glc}}$ ), 76.1 ( $C_{4\text{glc}}$ ), 72.6 ( $C_{3\text{glc}}$ ), 72.5 ( $C_{5\text{glc}}$ ), 71.4 ( $C_{2\text{glc}}$ ), 70.8 ( $C_{3\text{gal}}$ ), 70.5 ( $C_{5\text{gal}}$ ), 70.4, 70.3, 70.2, 70.2, 70.0, 69.2 ( $\text{OCH}_2$ ), 68.9 ( $C_{2\text{gal}}$ ), 68.9 ( $\text{OCH}_2$ ), 68.4 ( $C_q\text{CH}_2\text{O}$ ), 66.5 ( $C_{4\text{gal}}$ ), 64.4 ( $\text{OCH}_2\text{C}=\text{C}$ ), 62.0 ( $C_{6\text{glc}}$ ), 61.8 ( $C_q$ ), 60.6 ( $C_{6\text{gal}}$ ), 60.3 ( $\text{NCH}_2$ ), 52.5 ( $\text{HNCOCH}_2\text{N}_{\text{triazole}}$ ), 49.9 ( $\text{OCH}_2$ ), 20.7, 20.7, 20.6, 20.5, 20.5, 20.4 (7xs,  $\text{COCH}_3$ ).

$^{31}\text{P}$  NMR (122 MHz,  $\text{CDCl}_3$ ,  $\delta$  ppm): 10.0-9.6 (m, 3P).

$m/z$  (ESI<sup>+</sup>-MS) for  $\text{C}_{756}\text{H}_{1068}\text{N}_{81}\text{O}_{414}\text{P}_3 = 18008.6$  [ $M+\text{H}$ ]<sup>+</sup>; found 18008.5 (after deconvolution).

NMR diffusion studies ( $\text{CDCl}_3$ ):  $D = 1.48 \times 10^{-10}$  m<sup>2</sup>/s;  $d_s = 5.5$  nm.

GPC measurements (THF):  $M_w = 23790$ ;  $M_n = 23540$ , PDI ( $M_w/M_n$ ) = 1.011

( $\text{CHCl}_3/\text{Et}_3\text{N}$  (1%)):  $M_w = 21740$ ;  $M_n = 21350$ , PDI ( $M_w/M_n$ ) = 1.018.

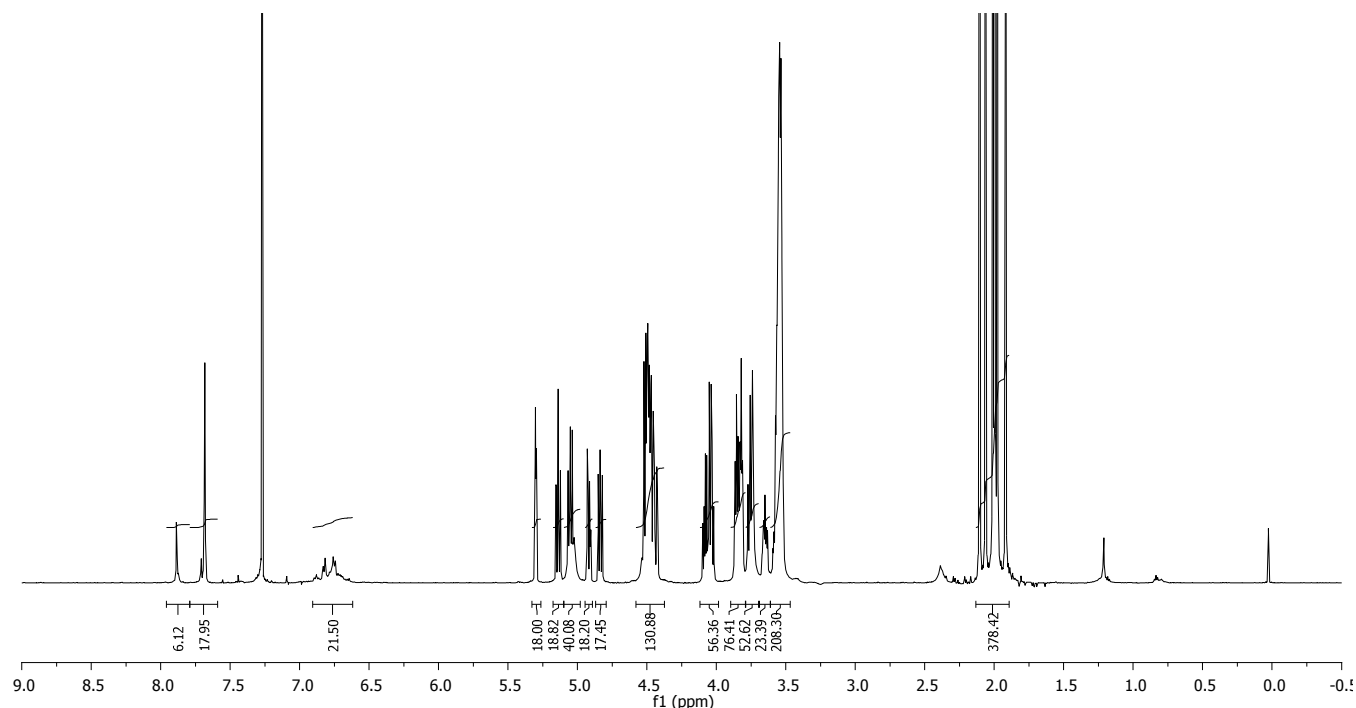

Figure S65.  $^1\text{H}$  NMR spectrum of compound 17 ( $\text{CDCl}_3$ , 600MHz)

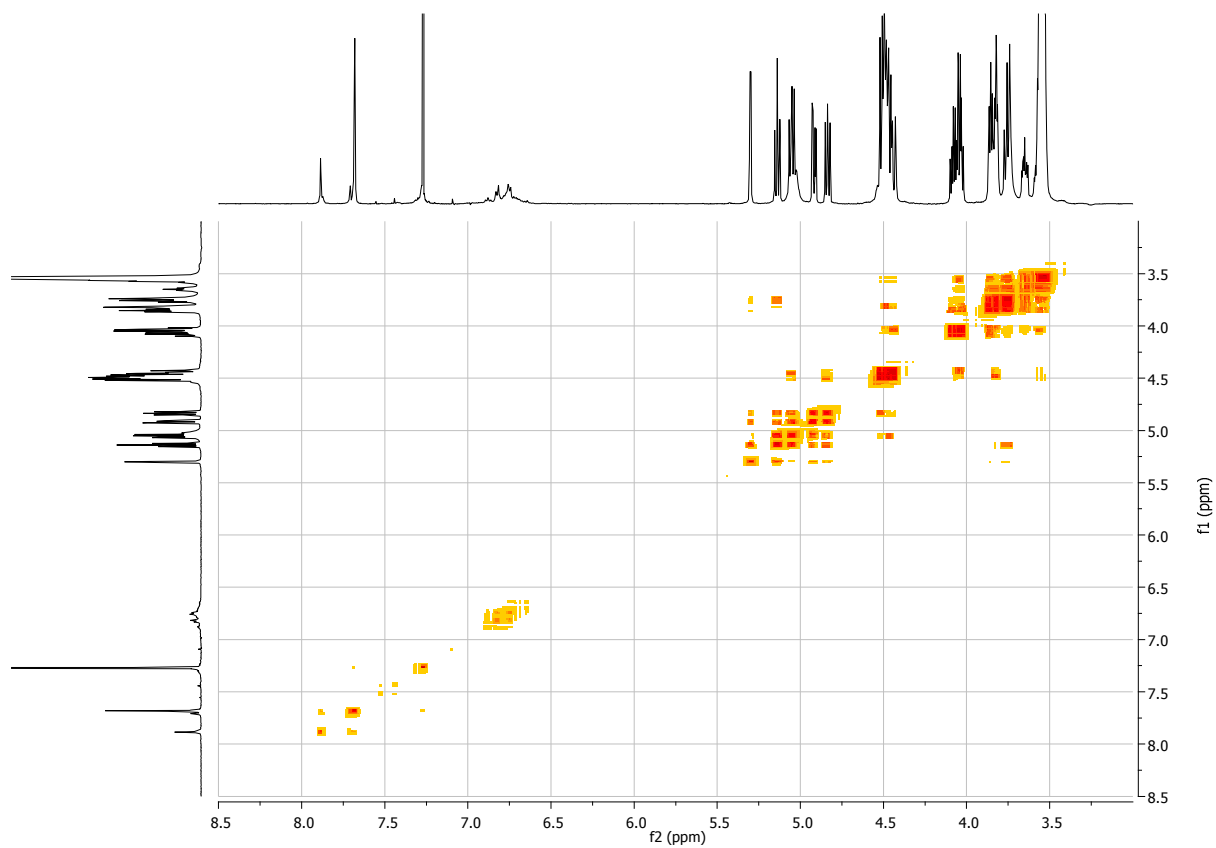

Figure S66. gCOSY spectrum of compound **17**

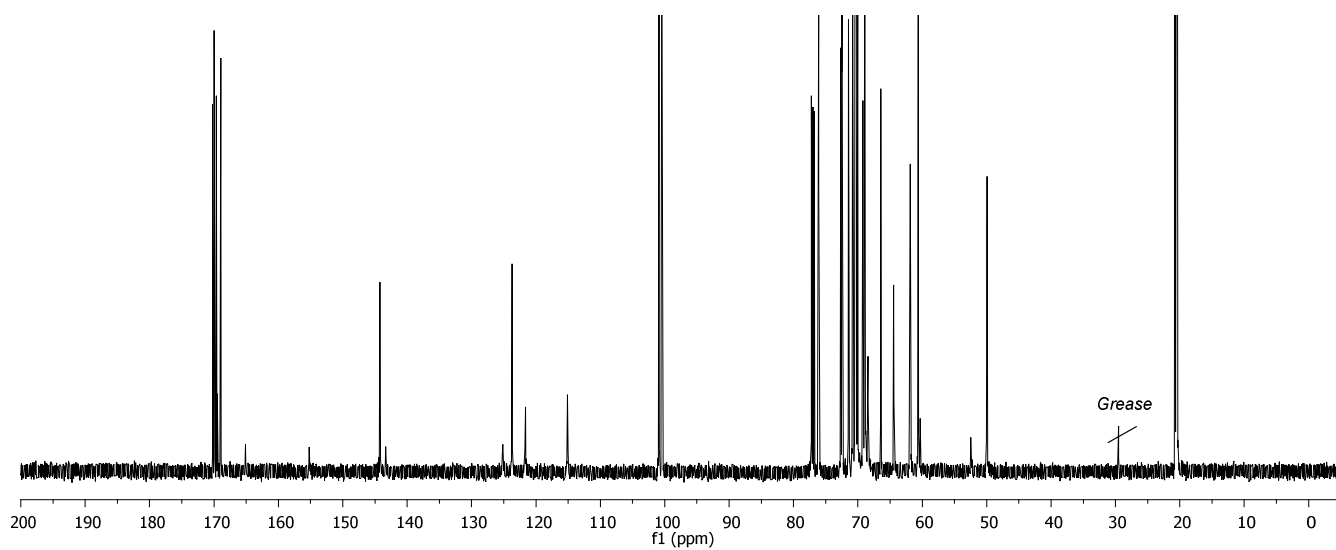

Figure S67.  $^{13}\text{C}$  NMR spectrum of compound **17** ( $\text{CDCl}_3$ , 150MHz)

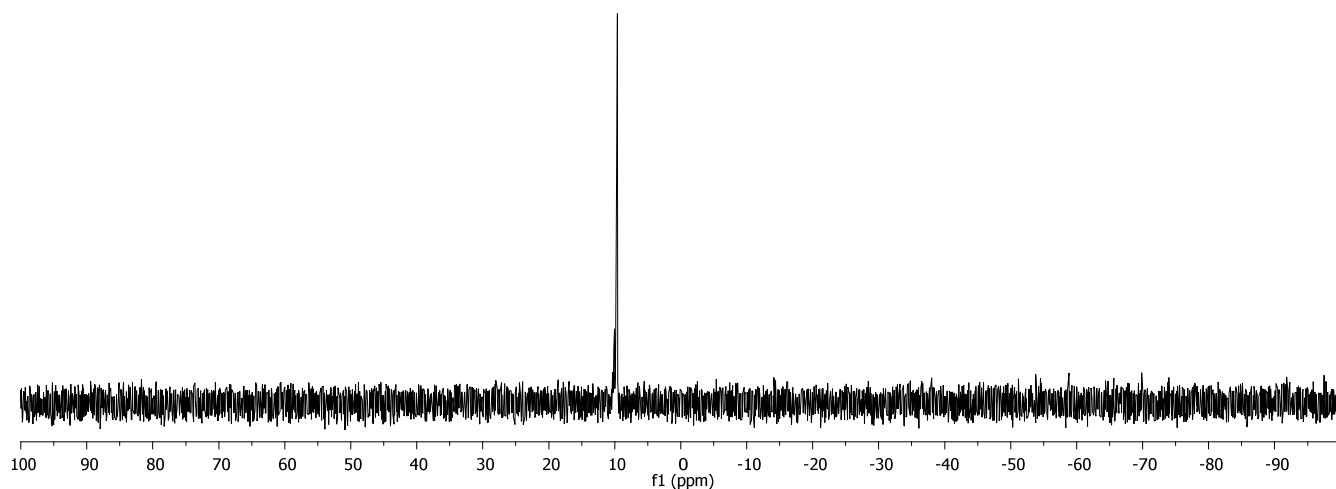

**Figure S68.**  $^{31}\text{P}$  NMR spectrum of compound **17** ( $\text{CDCl}_3$ , 122MHz)

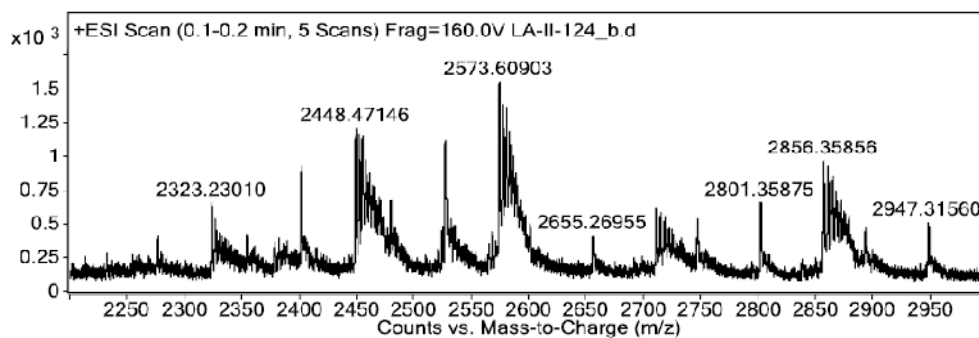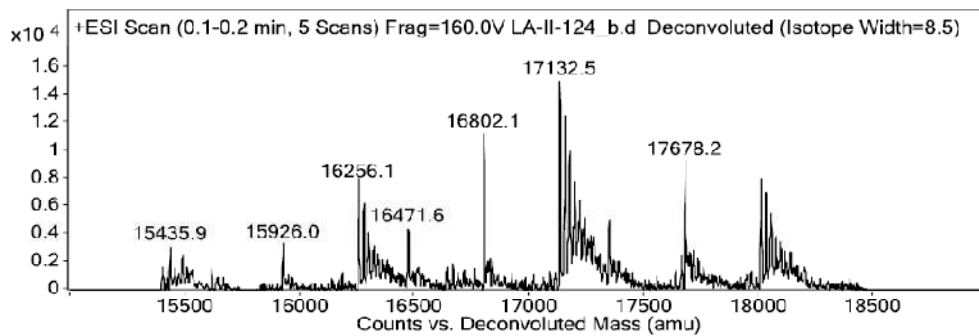



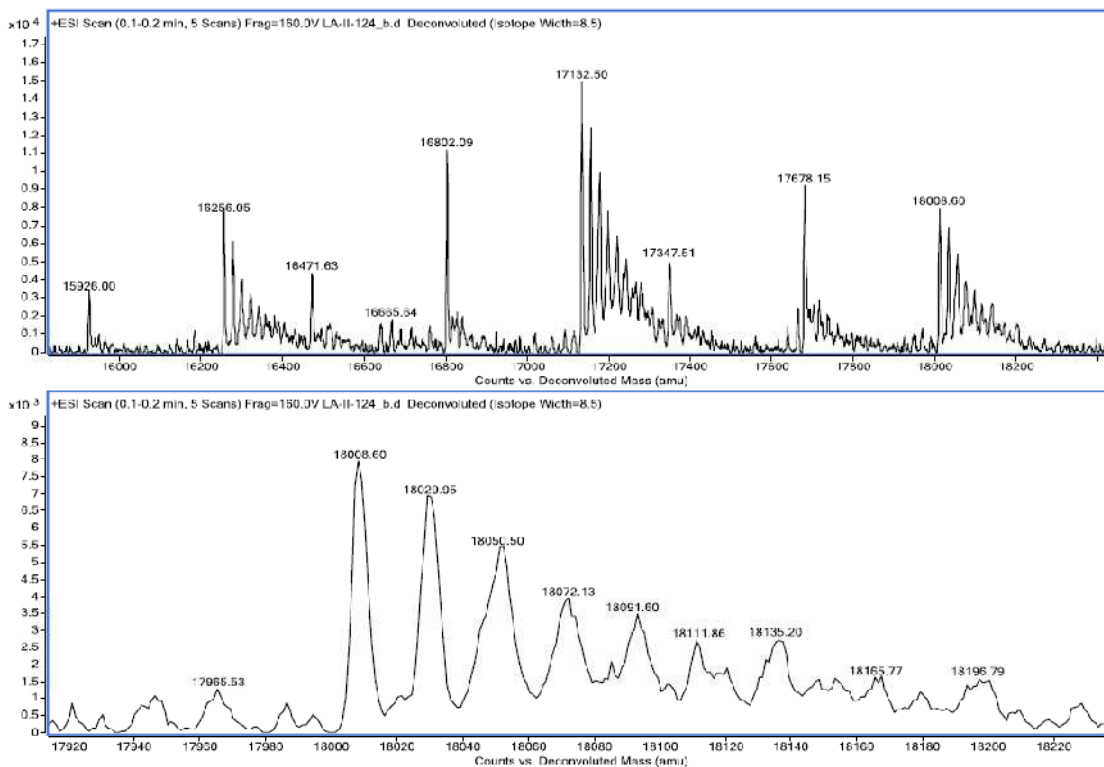

Figure S69. ESI<sup>+</sup>-MS (deconvolution) spectrum of compound 17

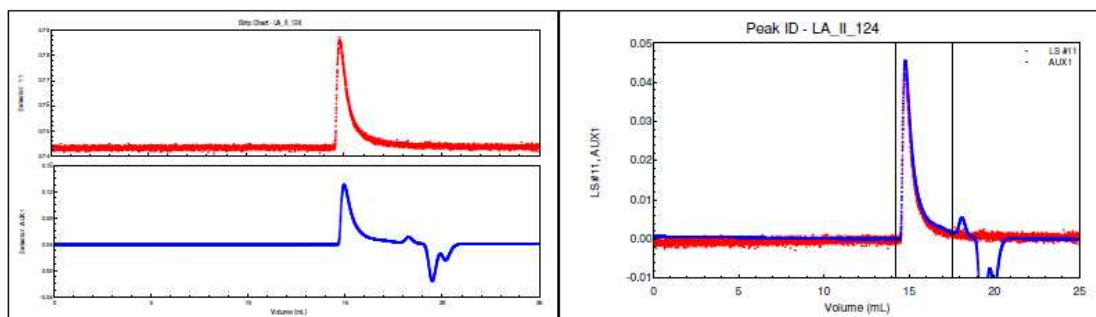

Polydispersity(Mw/Mn) : 1.011±0.128 (13%)  
 Polydispersity(Mz/Mn) : 1.021±0.226 (22%)

Molar Mass Moments (g/mol)

Mn : 2.354e+04 (8%)  
 Mw : 2.379e+04 (8%)  
 Mz : 2.403e+04 (20%)

Figure S70. GPC trace of compound 17

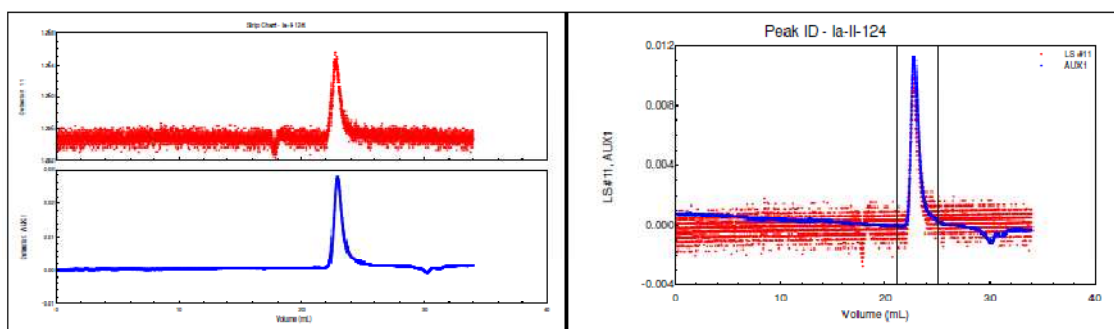

**Polydispersity(Mw/Mn) :** 1.018±0.184 (18%)  
**Polydispersity(Mz/Mn) :** 1.041±0.331 (32%)

**Molar Mass Moments (g/mol)**  
**Mn** : 2.135e+04 (12%)  
**Mw** : 2.174e+04 (12%)  
**Mz** : 2.222e+04 (28%)

**Figure S71.** GPC trace (in CHCl<sub>3</sub>/Et<sub>3</sub>N (1%)) of compound 17

## Hydroxylated hexavalent glycocluster **18**

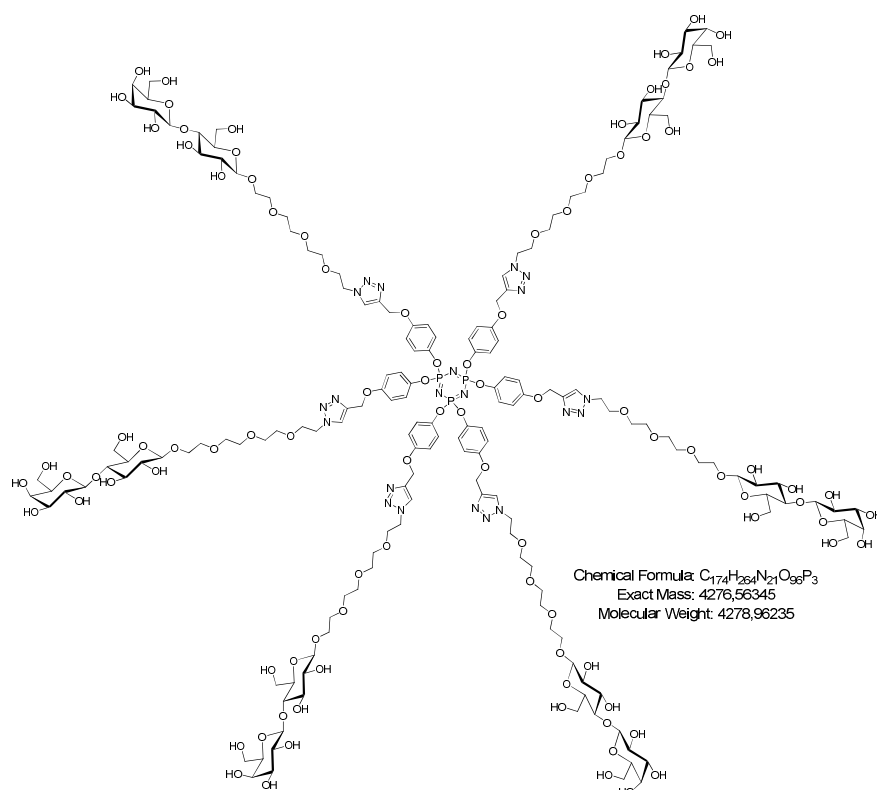

Acetylated compound **16** (43.0 mg, 7.11  $\mu\text{mol}$ ) was dissolved in a dry mixture of MeOH/DCM (5 mL, 4:1) and a solution of sodium methoxide (1M in MeOH, 5  $\mu\text{L}$  every 20 minutes until precipitation) was added. An additional 100  $\mu\text{L}$  was then injected and the heterogeneous reaction mixture was stirred at room temperature for 24 h.. The solvent was then removed with a Pasteur pipette and another dry mixture of MeOH/DCM (5 mL, 4:1) is added to the residual oil. A vigorous agitation is maintained for an additional 15 min. period. After removal of the solvents with a Pasteur pipette, 2 mL of dry MeOH were added to the viscous residue under agitation. After 15 min., the MeOH was removed and the residue was dissolved in 3 mL of H<sub>2</sub>O, and the pH was adjusted to 7 with addition of ion-exchange resin (Amberlite IR 120 H<sup>+</sup>). After filtration, the solvent was removed under *vacuum* with rotary evaporator, lyophilized to yield the fully deprotected hexamer **18** as a white solid (25.0 mg, 5.84  $\mu\text{mol}$ ) in an 82% yield.

<sup>1</sup>H NMR (600 MHz, D<sub>2</sub>O,  $\delta$  ppm): 7.99 (s, 6H, *H*<sub>triazole</sub>), 6.73 (br s, 24H, *CH*<sub>ar</sub>), 5.03 (br s, 12H, *C*<sub>q</sub>*CH*<sub>2</sub>O), 4.51 (br s, 12H, *CH*<sub>2</sub>N), 4.46-4.43 (m, 12H, *H*<sub>1glc</sub>, *H*<sub>1gal</sub>), 3.98-3.84 (m, 18H, *OCH*<sub>2</sub>*CH*<sub>2</sub>N, *LacOCHHCH*<sub>2</sub>), 3.82-3.47 (m, 132H, *H*<sub>3glc</sub>, *H*<sub>2gal</sub>, *H*<sub>3gal</sub>, *H*<sub>6bglc</sub>, *H*<sub>4gal</sub>, *H*<sub>6agal</sub>, *H*<sub>6bgal</sub>, *H*<sub>6aglc</sub>, *H*<sub>5gal</sub>, *H*<sub>5glc</sub>, *H*<sub>4glc</sub>, *LacOCHHCH*<sub>2</sub>, *OCH*<sub>2</sub>), 3.33 (t<sub>app</sub>, 6H, *H*<sub>2glc</sub>).

<sup>13</sup>C NMR (150 MHz, CDCl<sub>3</sub>,  $\delta$  ppm): 155.6 (*C*<sub>a</sub>), 144.6 (*C*<sub>d</sub>), 143.7 (*C*<sub>triazole</sub>=CH), 125.9 (*C*<sub>triazole</sub>=CH), 122.4 (*C*<sub>c</sub>), 116.3 (*C*<sub>b</sub>), 103.7 (*C*<sub>1gal</sub>), 102.8 (*C*<sub>1glc</sub>), 79.1 (*C*<sub>4glc</sub>), 76.0 (*C*<sub>3glc</sub>), 75.4 (*C*<sub>5glc</sub>), 75.0 (*C*<sub>5gal</sub>), 73.5 (*C*<sub>2glc</sub>), 73.2 (*C*<sub>3gal</sub>), 71.6 (*C*<sub>2gal</sub>), 70.3, 70.2, 70.2, 69.4, (*OCH*<sub>2</sub>), 69.3 (*C*<sub>4gal</sub>), 69.2 (*OCH*<sub>2</sub>), 62.0 (*OCH*<sub>2</sub>C=C), 61.7 (*C*<sub>6glc</sub>), 60.8 (*C*<sub>6gal</sub>), 50.7 (*NCH*<sub>2</sub>).

<sup>31</sup>P NMR (122 MHz, D<sub>2</sub>O,  $\delta$  ppm): 10.2 (s, 3P).

$m/z$  (ESI<sup>+</sup>-HRMS) for C<sub>174</sub>H<sub>264</sub>N<sub>21</sub>O<sub>96</sub>P<sub>3</sub> = 1070.1481 [M+4H]<sup>4+</sup>, found 1070.1473; 2139.2890 [M+2H]<sup>2+</sup>, found 2139.2886.

**NMR diffusion studies** (D<sub>2</sub>O):  $D = 1.10 \times 10^{-10}$  m<sup>2</sup>/s;  $d_s = 3.6$  nm.

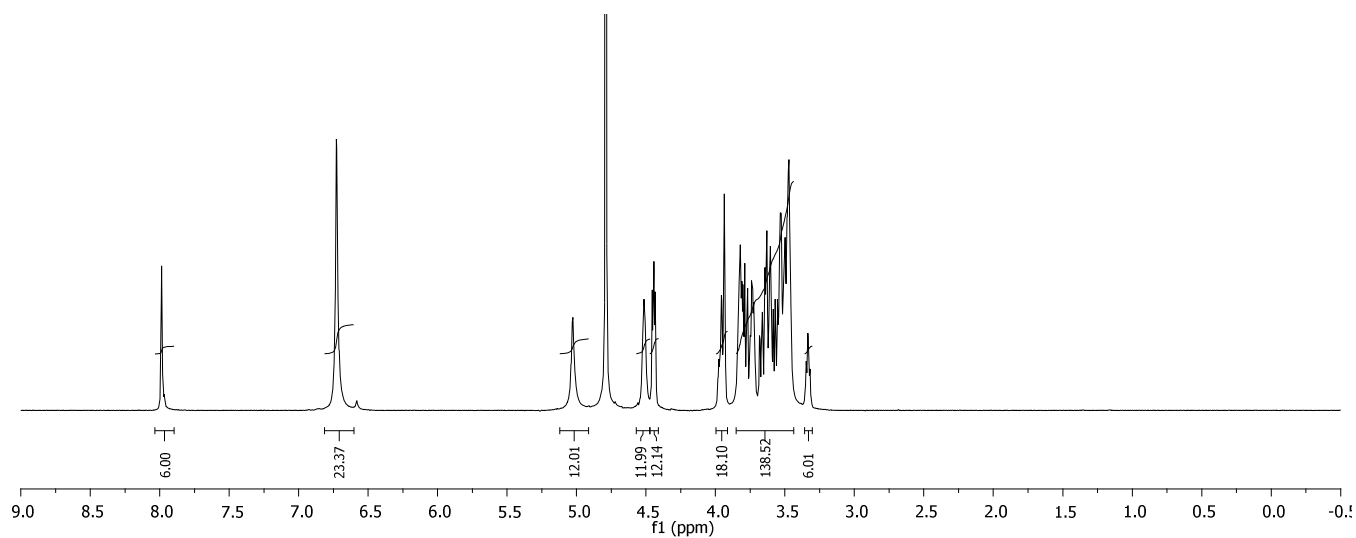

**Figure S72.** <sup>1</sup>H NMR spectrum of compound **18** (D<sub>2</sub>O, 600MHz)

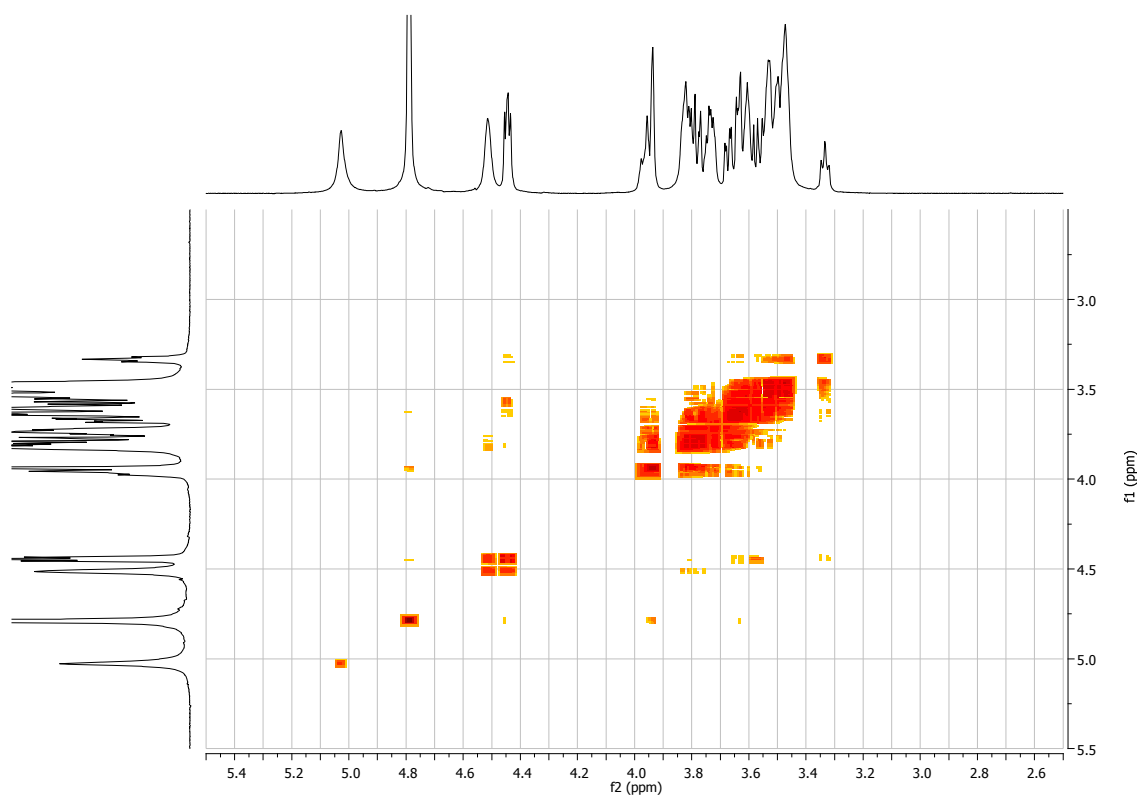

**Figure S73.** gCOSY spectrum of compound **18**

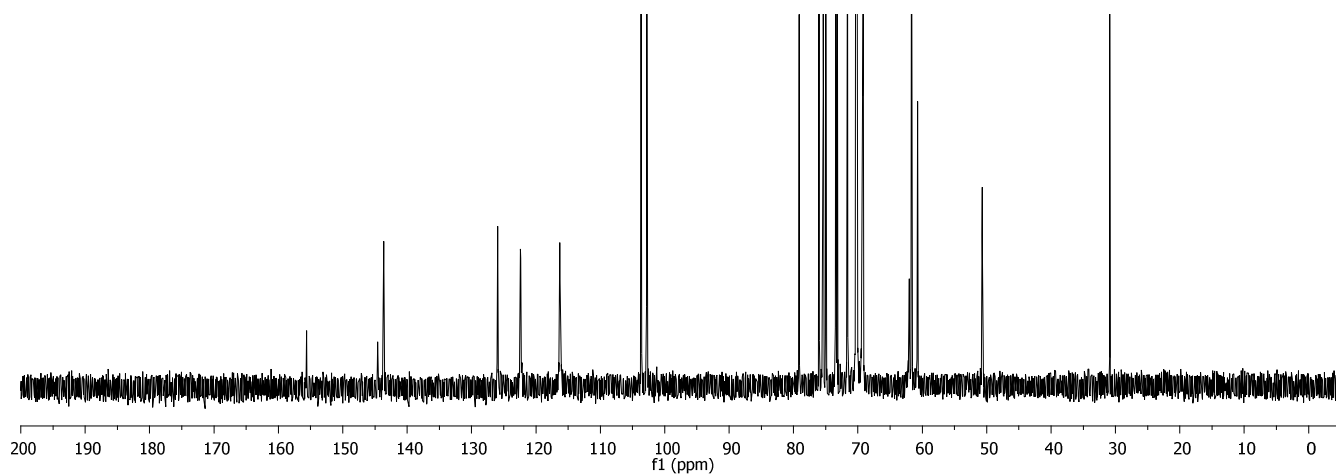

**Figure S74.** <sup>13</sup>C NMR spectrum of compound **18** (D<sub>2</sub>O, 150MHz, acetone as reference)

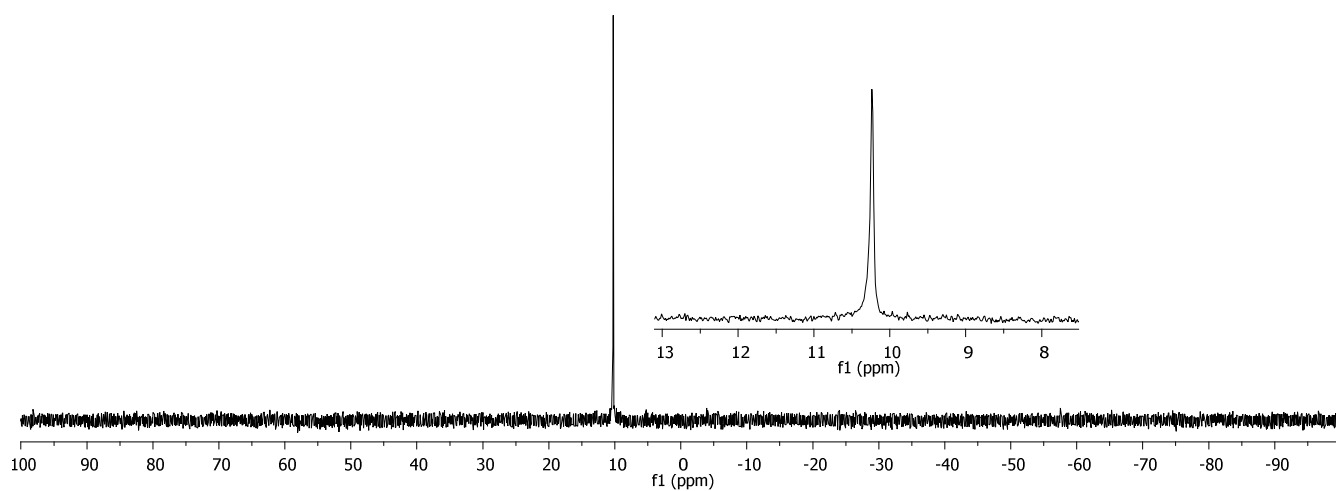

**Figure S75.** <sup>31</sup>P NMR spectrum of compound **18** (D<sub>2</sub>O, 122MHz)

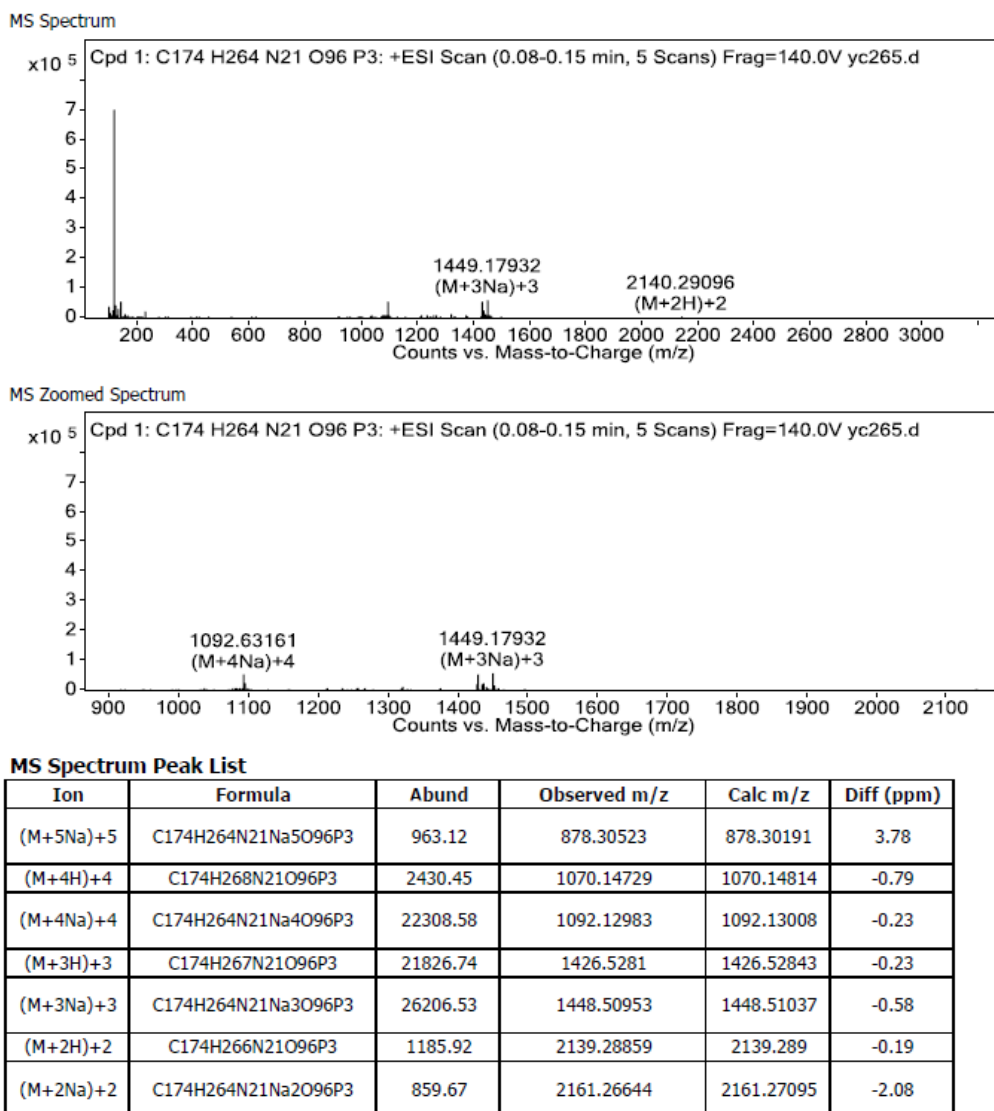

Figure S76. ESI<sup>+</sup>-HRMS spectrum of compound **18**

## Hydroxylated octadecaivalent glycodendrimer **19**

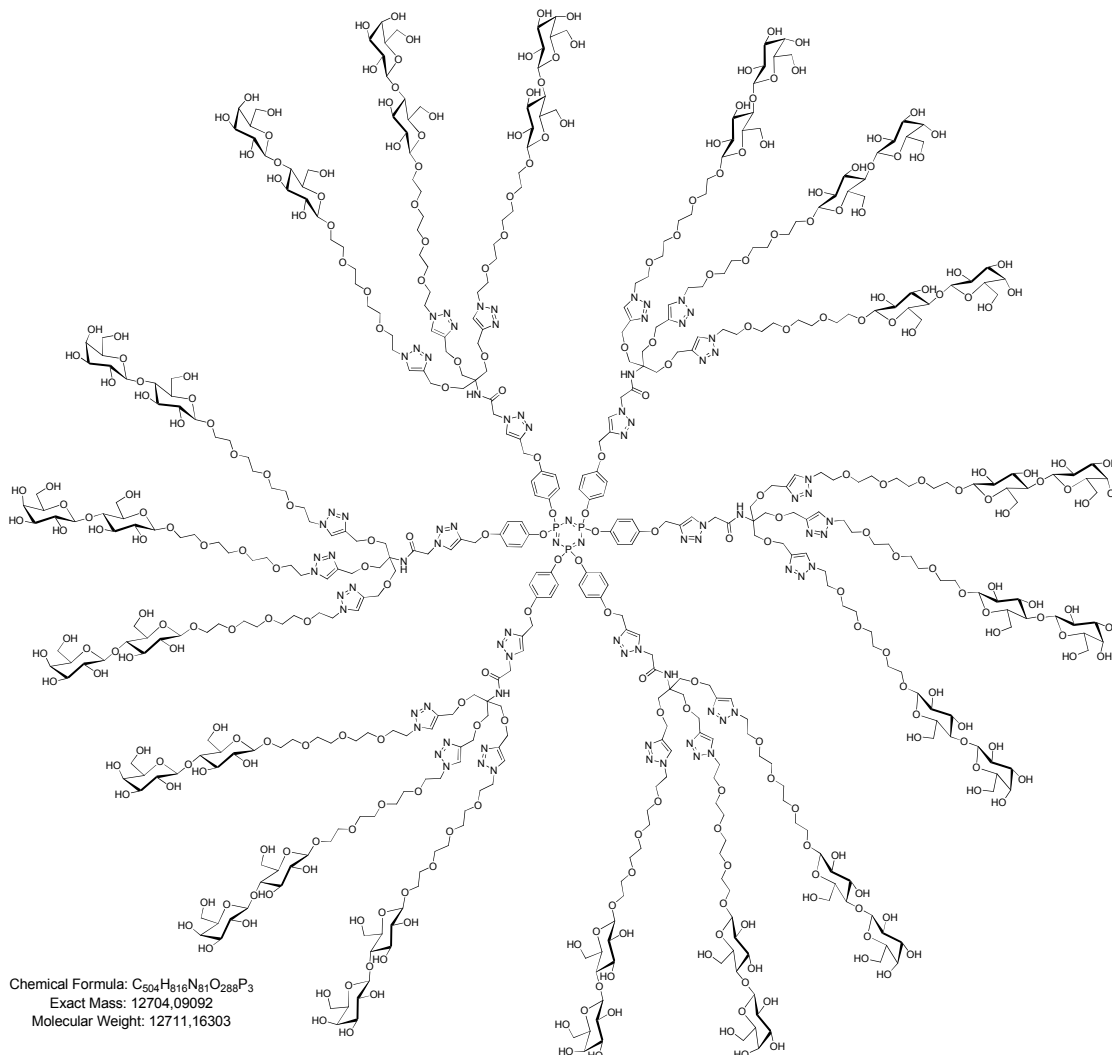

Acetylated compound **17** (60.0 mg, 3.33  $\mu\text{mol}$ ) was dissolved in a dry mixture of MeOH/DCM (5 mL, 4:1) and a solution of sodium methoxide (1M in MeOH, 5  $\mu\text{L}$  every 20 minutes until precipitation) was added. An additional 100  $\mu\text{L}$  was then injected and the heterogeneous reaction mixture was stirred at room temperature for 18 hours. The solvent was then removed with a Pasteur pipette and another dry mixture of MeOH/DCM (5 mL, 4:1) is added to the residual oil. A vigorous agitation is maintained for an additional 15 min. period. After removal of the solvents with a Pasteur pipette, 2 mL of dry MeOH were added to the viscous residue under agitation. After 15 min., the MeOH was removed and the residue was dissolved in 3 mL of  $\text{H}_2\text{O}$ , and the pH was adjusted to 7 with addition of ion-exchange resin (Amberlite IR 120  $\text{H}^+$ ). After filtration, the solvent was removed under *vacuum* with rotary evaporator, lyophilized to yield the fully deprotected derivative **19** as a white solid (39.0 mg, 3.07  $\mu\text{mol}$ , **90%**).

$^1\text{H NMR}$  (600 MHz,  $\text{D}_2\text{O}$ ,  $\delta$  ppm): 8.06-7.96 (m, 24H,  $H_{\text{triazole}}$ ), 6.84-6.77 (m, 24H,  $\text{CH}_{\text{ar}}$ ), 5.20-5.14 (m, 24H,  $\text{NHCOCH}_2\text{N}$ ,  $\text{C}_q\text{CH}_2\text{O}$ ), 4.57-4.50 (m, 72H,  $\text{CH}_2\text{N}$ ,  $\text{C}_q\text{-triazoleCH}_2\text{O}$ ), 4.49-4.44 (m, 36H,  $H_{1\text{glc}}$ ,  $H_{1\text{gal}}$ ), 4.02-3.55 (m, 486,

OCH<sub>2</sub>CH<sub>2</sub>N, H<sub>3glc</sub>, H<sub>2gal</sub>, H<sub>3gal</sub>, H<sub>6bglc</sub>, H<sub>6agal</sub>, H<sub>6bgal</sub>, H<sub>6aglc</sub>, H<sub>5gal</sub>, H<sub>5glc</sub>, H<sub>4glc</sub>, H<sub>4gal</sub>, LacOCH<sub>2</sub>CH<sub>2</sub>, OCH<sub>2</sub>, NHC<sub>q</sub>CH<sub>2</sub>O), 3.22 (t<sub>app</sub>, 18H, H<sub>2glc</sub>).

**<sup>13</sup>C NMR** (150 MHz, CDCl<sub>3</sub>, δ ppm): 167.1 (CONH), 156.6 (C<sub>a</sub>), 144.6 (C<sub>d</sub>), 143.7 (C<sub>triazole=CH</sub>), 127.0 (C<sub>triazole=CH</sub>), 125.9 (C<sub>triazole=CH</sub>), 122.4 (C<sub>c</sub>), 116.3 (C<sub>b</sub>), 103.6 (C<sub>1gal</sub>), 102.8 (C<sub>1glc</sub>), 79.1 (C<sub>4glc</sub>), 76.0 (C<sub>3glc</sub>), 75.4 (C<sub>5glc</sub>), 75.0 (C<sub>5gal</sub>), 73.5 (C<sub>2glc</sub>), 73.2 (C<sub>3gal</sub>), 71.6 (C<sub>2gal</sub>), 70.3, 70.2, 70.2, 70.2, 70.1 (OCH<sub>2</sub>), 69.3 (C<sub>4gal</sub>), 69.2 (OCH<sub>2</sub>), 68.1 (C<sub>q</sub>CH<sub>2</sub>O), 64.2 (OCH<sub>2</sub>C=C), 62.0 (C<sub>q</sub>), 61.7 (C<sub>6glc</sub>), 60.9 (C<sub>6gal</sub>), 60.8 (OCH<sub>2</sub>), 52.9 (N<sub>triazole</sub>CH<sub>2</sub>CO), 50.6 (CH<sub>2</sub>N).

**<sup>31</sup>P NMR** (122 MHz, D<sub>2</sub>O, δ ppm): 10.2 (s, 3P).

*m/z* (ESI<sup>+</sup>-HRMS) for C<sub>504</sub>H<sub>816</sub>N<sub>81</sub>O<sub>288</sub>P<sub>3</sub> = 12712.2, found 12711.7 ([*M*+H]<sup>+</sup>, after deconvolution).

**NMR diffusion studies** (D<sub>2</sub>O): *D* = 0.67×10<sup>-10</sup> m<sup>2</sup>/s; *d<sub>s</sub>* = 5.9 nm.

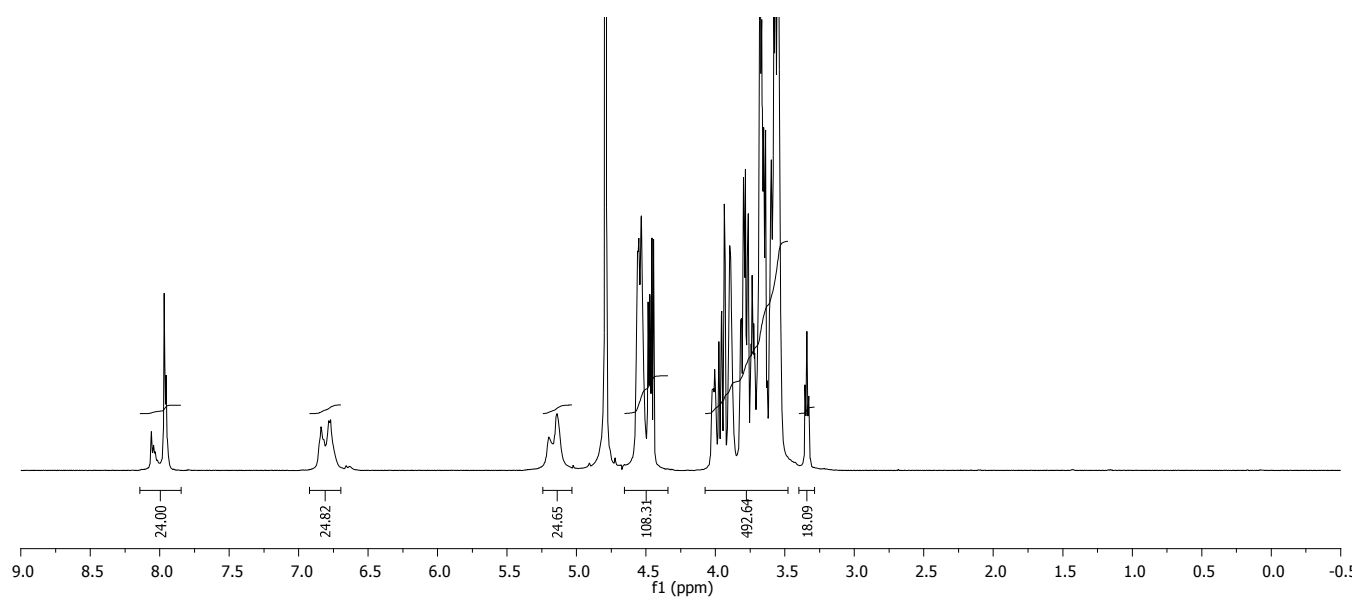

**Figure S77.** <sup>1</sup>H NMR spectrum of compound **19** (D<sub>2</sub>O, 600MHz)



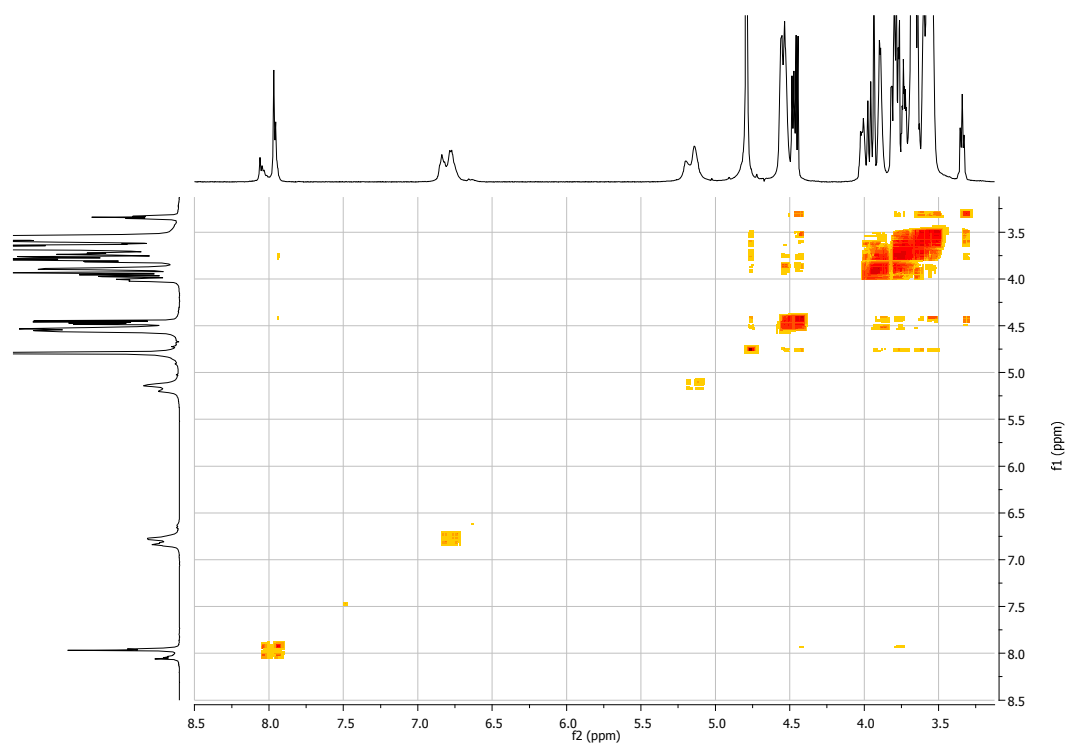

**Figure S78.** gCOSY spectrum of compound **19**

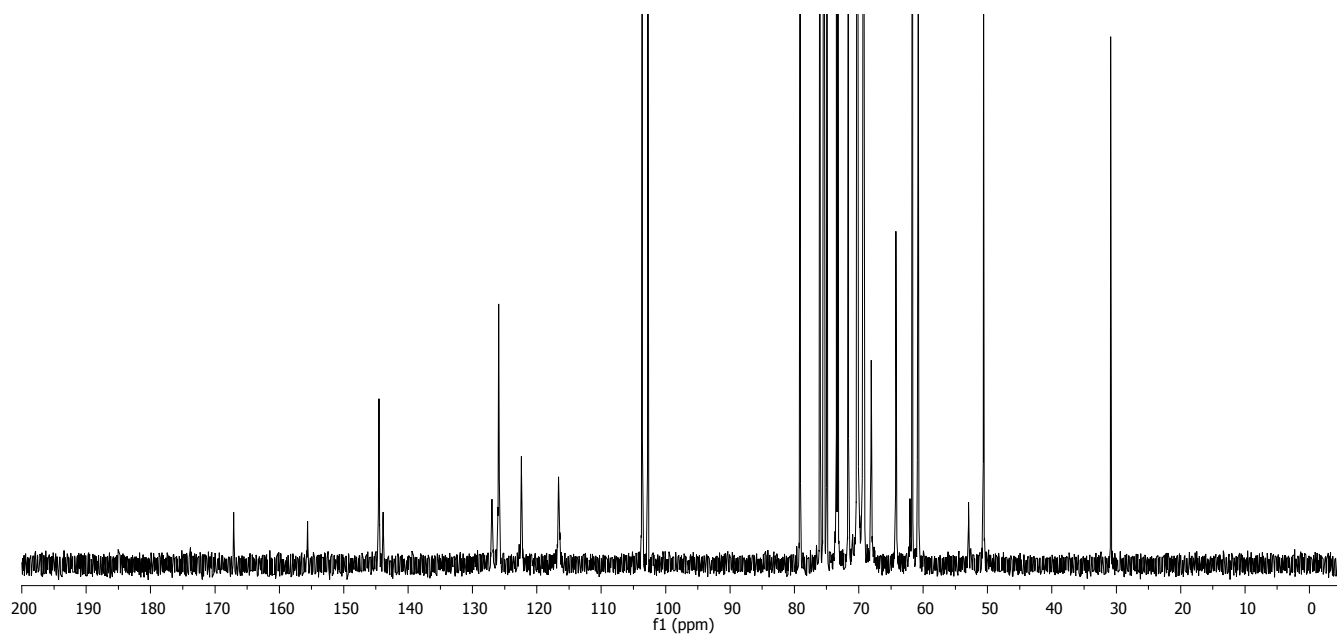

**Figure S79.**  $^{13}\text{C}$  NMR spectrum of compound **19** ( $\text{D}_2\text{O}$ , 150MHz, acetone as reference)

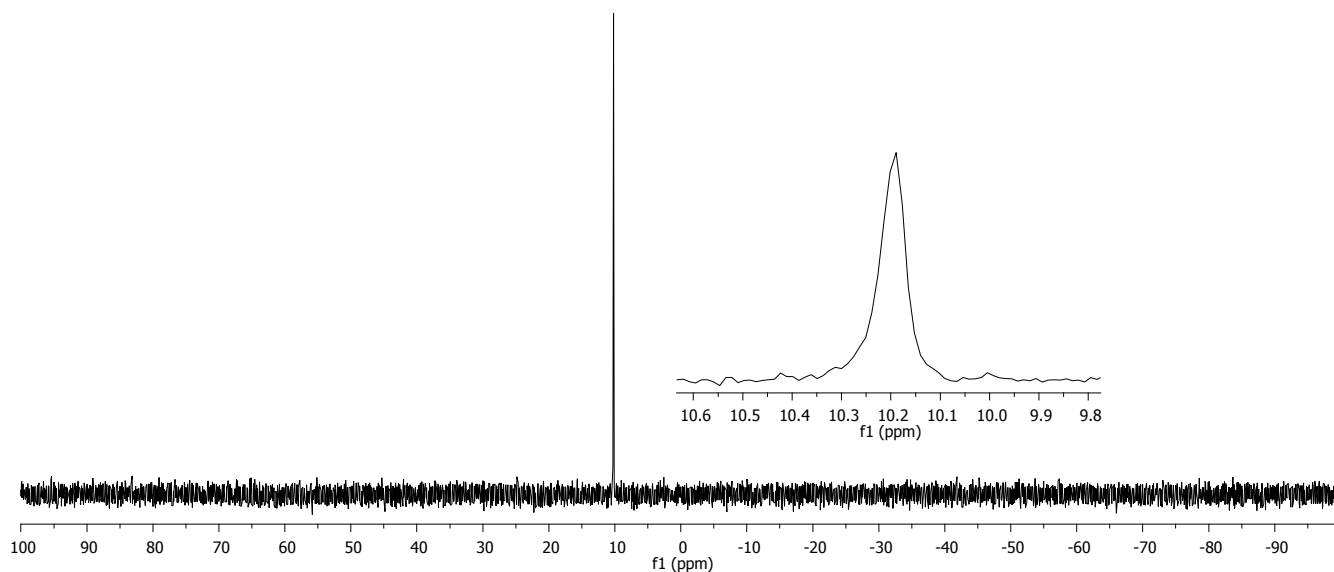

Figure S80.  $^{31}\text{P}$  NMR spectrum of compound **19** ( $\text{D}_2\text{O}$ , 122MHz)

User Spectra

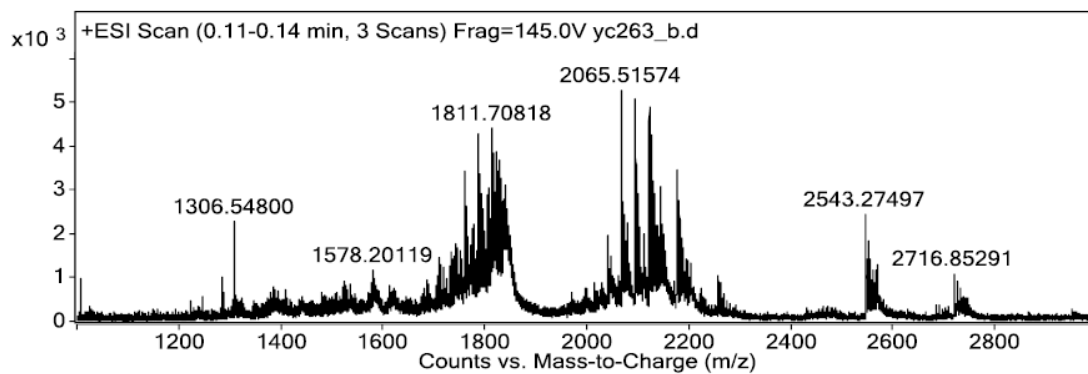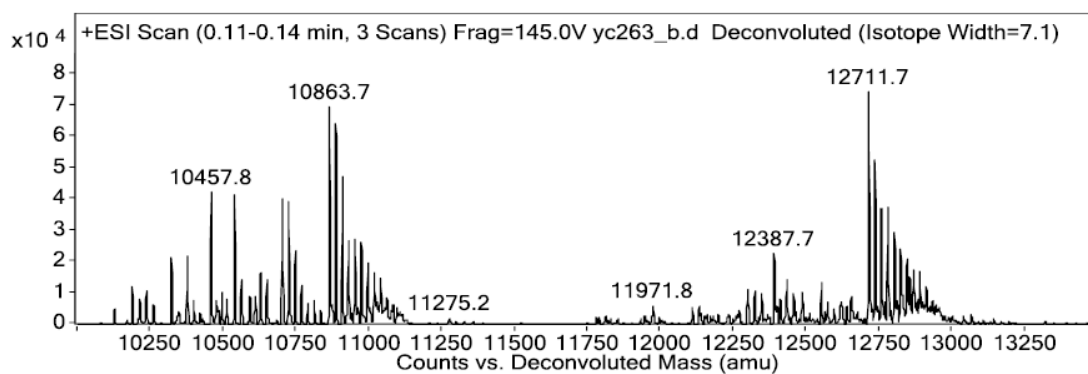

Figure S81. ESI<sup>+</sup>-MS spectrum (deconvolution) of compound **19**

## Protected dumbbell-shape decavalent glycocluster **21**

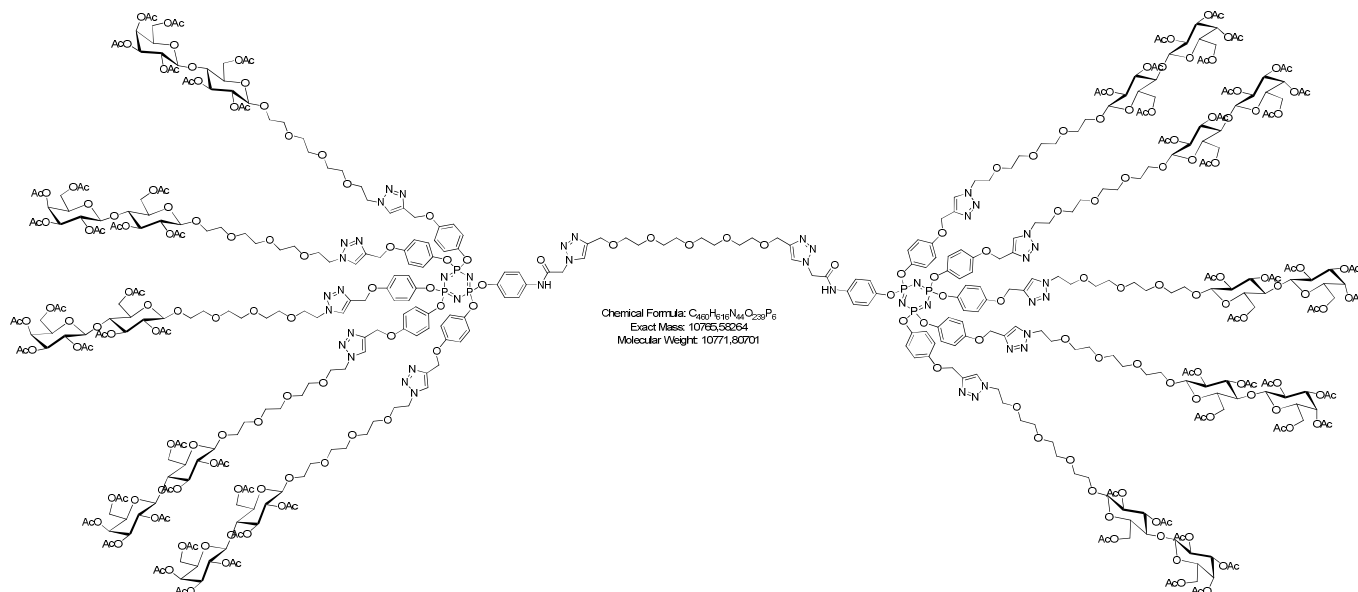

To a solution of known dipropargylated tetra(ethylene)glycol **20**<sup>5</sup> (1.52 mg, 5.63  $\mu\text{mol}$ , 1.0 eq.) in a 1:1 mixture of H<sub>2</sub>O/THF<sub>anh</sub> (4 mL), were added azido dendron derivative **15** (65.0 mg, 12.4  $\mu\text{mol}$ , 2.2 eq.), CuSO<sub>4</sub>·5H<sub>2</sub>O (8.4 mg, 33.0  $\mu\text{mol}$ , 6.0 eq.) and sodium ascorbate (6.7 mg, 33.0  $\mu\text{mol}$ , 6.0 eq.). While stirring, the mixture was first heated at 50°C for 3 hours in a 20 mL vial and at room temperature for additional 18 hours. Ethyl acetate (15 mL) was added and the solution was poured into a separatory funnel containing ethyl acetate (10 mL), washed with saturated aqueous NH<sub>4</sub>Cl (2×10 mL), water (10 mL) and brine (5 mL). Organics were collected, dried over Na<sub>2</sub>SO<sub>4</sub> and concentrated to dryness *in vacuo* with rotary evaporator. Purification by flash chromatography (SiO<sub>2</sub>, DCM/MeOH 100:0 to 85:15) afforded desired multivalent compound **21** (44.0 mg, 4.08  $\mu\text{mol}$ , **73%**) as a yellowish foam.

R<sub>f</sub> = 0.50, DCM/MeOH 90:10.

**<sup>1</sup>H NMR** (600 MHz, CDCl<sub>3</sub>,  $\delta$  ppm): 10.12 (s, 2H, NH), 7.89 (s, 3H, H<sub>triazole</sub>), 7.85-7.80 (2xs, 9H, H<sub>triazole</sub>), 7.33 (d, <sup>3</sup>J = 8.6 Hz, 4H, CH<sub>b</sub>), 6.96-6.69 (m, 40H, CH<sub>b</sub>, CH<sub>c</sub>), 6.53 (d, <sup>3</sup>J = 8.6 Hz, 4H, CH<sub>c</sub>), 5.40 (br s, 4H, NCH<sub>2</sub>CO), 5.30 (d<sub>app</sub>, 10H, H<sub>4gal</sub>), 5.18-5.07 (m, 40H, H<sub>3glc</sub>, C<sub>q</sub>CH<sub>2</sub>O, H<sub>2gal</sub>), 4.94 (dd, <sup>3</sup>J<sub>2,3</sub> = 2.3 Hz, <sup>3</sup>J<sub>3,4</sub> = 3.5 Hz, 10H, H<sub>3gal</sub>), 4.84 (t<sub>app</sub>, 10H, H<sub>2glc</sub>), 4.64 (br s, 4H, C<sub>q</sub>-triazole-CH<sub>2</sub>O), 4.55-4.46 (m, 50H, CH<sub>2</sub>N, H<sub>1glc</sub>, H<sub>6aglc</sub>, H<sub>1gal</sub>), 4.13-4.05 (m, 30H, H<sub>6bglc</sub>, H<sub>6agal</sub>, H<sub>6bgal</sub>), 3.86-3.54 (m, 186H, H<sub>5gal</sub>, H<sub>5glc</sub>, H<sub>4glc</sub>, OCH<sub>2</sub>), 2.17-1.92 (7xs, 210H, COCH<sub>3</sub>).

**<sup>13</sup>C NMR** (75 MHz, CDCl<sub>3</sub>,  $\delta$  ppm): 170.2, 170.2, 170.0, 169.9, 169.6, 169.5, 169.0 (7xs, COCH<sub>3</sub>), 164.0 (C=O), 155.3 + 155.2 (C<sub>a</sub>), 146.6 (C<sub>d'</sub>), 144.5 (C<sub>d</sub>), 144.4 (C<sub>d</sub>), 143.8 (C<sub>triazole</sub>=CH), 143.5 (C<sub>triazole</sub>=CH), 143.3 (C<sub>triazole</sub>=CH), 134.5 (C<sub>a'</sub>), 124.7 (CH<sub>triazole</sub>), 124.7 (CH<sub>triazole</sub>), 124.0 (CH<sub>triazole</sub>), 121.9 (C<sub>c</sub>), 121.8 (C<sub>c</sub>), 121.7 (C<sub>b'</sub>), 121.6 (C<sub>c</sub>), 120.9 (C<sub>c</sub>), 120.9 (C<sub>c</sub>), 120.7 (C<sub>c</sub>), 115.3 (C<sub>b</sub>), 115.1 (C<sub>b</sub>), 100.9 (C<sub>1gal</sub>), 100.4 (C<sub>1glc</sub>), 76.2 (C<sub>4glc</sub>), 72.7 (C<sub>3glc</sub>), 72.6 (C<sub>5glc</sub>), 72.5 (C<sub>2glc</sub>), 71.5 (C<sub>3gal</sub>), 70.8 (C<sub>5gal</sub>), 70.6, 70.5, 70.5, 70.4, 70.4, 70.3, 70.3, 70.3, 70.2, 70.1, 70.1, 69.4, 69.2, 69.2 (OCH<sub>2</sub>),

<sup>5</sup> X. Sheng, T. C. Mauldin and M. R. Kessler, *J. Polym. Sci.: Part A: Polym. Chem.*, 2010, **48**, 4093–4102.

68.9 ( $C_{2gal}$ ), 68.9 ( $OCH_2$ ), 66.5 ( $C_{4gal}$ ), 64.3 ( $C_{q-triazole}CH_2OCH_2$ ), 62.1 ( $OCH_2C=C$ ), 61.8 ( $C_{6glc}$ ), 61.6 ( $C_{6gal}$ ), 60.6, 52.4 ( $NHCOCH_2N_{triazole}$ ), 50.2 ( $NCH_2$ ), 50.1 ( $NCH_2$ ), 20.8, 20.7, 20.6, 20.5, 20.5, 20.4 (7xs,  $COCH_3$ ).

$^{31}P$  NMR (122 MHz,  $CDCl_3$ ,  $\delta$  ppm): 10.8-9.4 (m, 6P).

$m/z$  (ESI<sup>+</sup>-MS) for  $C_{460}H_{616}N_{44}O_{239}P_6 = 10772.8 [M+H]^+$ ; found 10772.5 (After deconvolution).

NMR diffusion studies ( $CDCl_3$ ):  $D = 2.47 \times 10^{-10} m^2/s$ ;  $d_s = 3.3$  nm.

GPC measurements (THF):  $M_w = 14710$ ;  $M_n = 13860$ , PDI ( $M_w/M_n$ ) = 1.061

( $CHCl_3/Et_3N$  (1%)):  $M_w = 10410$ ;  $M_n = 10180$ , PDI ( $M_w/M_n$ ) = 1.023

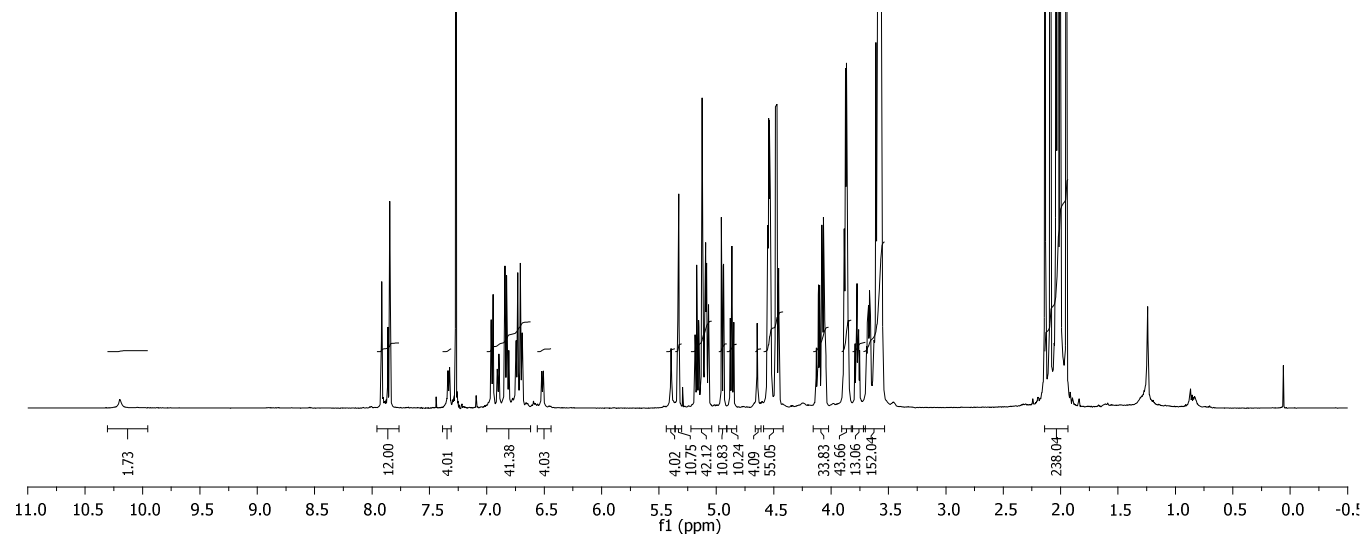

Figure S82.  $^1H$  NMR spectrum of compound **21** ( $CDCl_3$ , 600MHz)

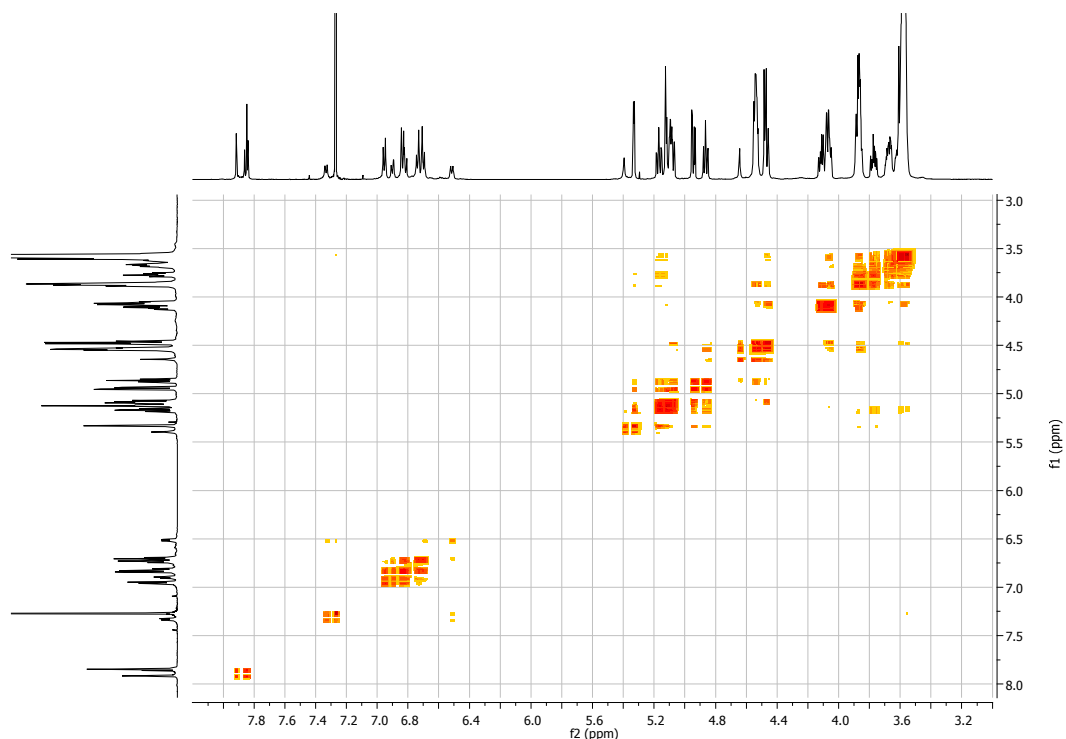

Figure S83. gCOSY spectrum of compound **21**

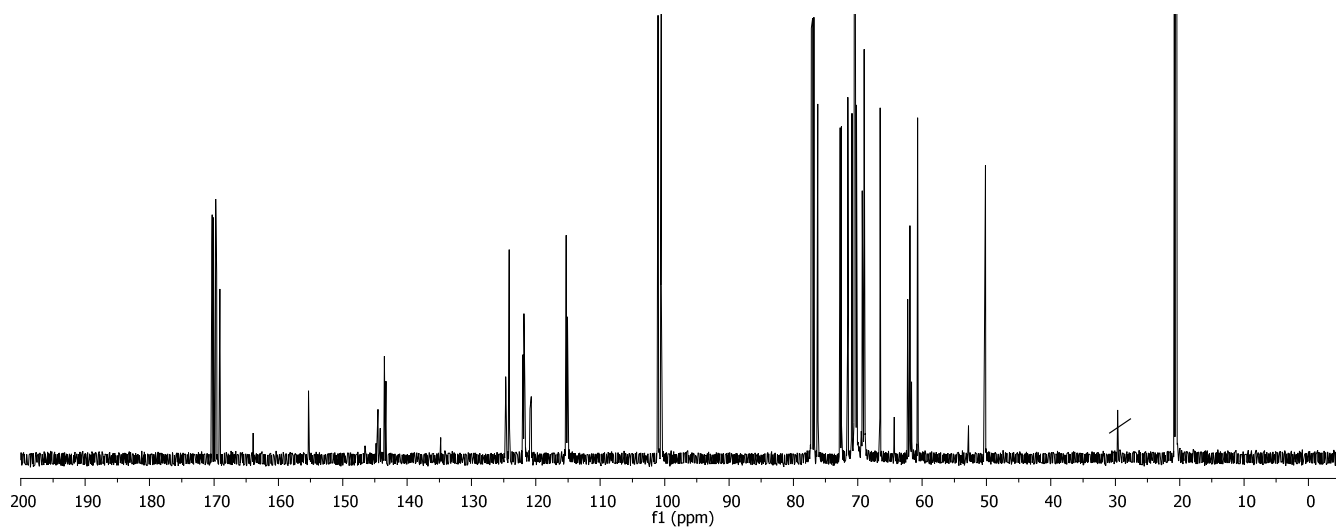

Figure S84.  $^{13}\text{C}$  NMR spectrum of compound **21** ( $\text{CDCl}_3$ , 150MHz)

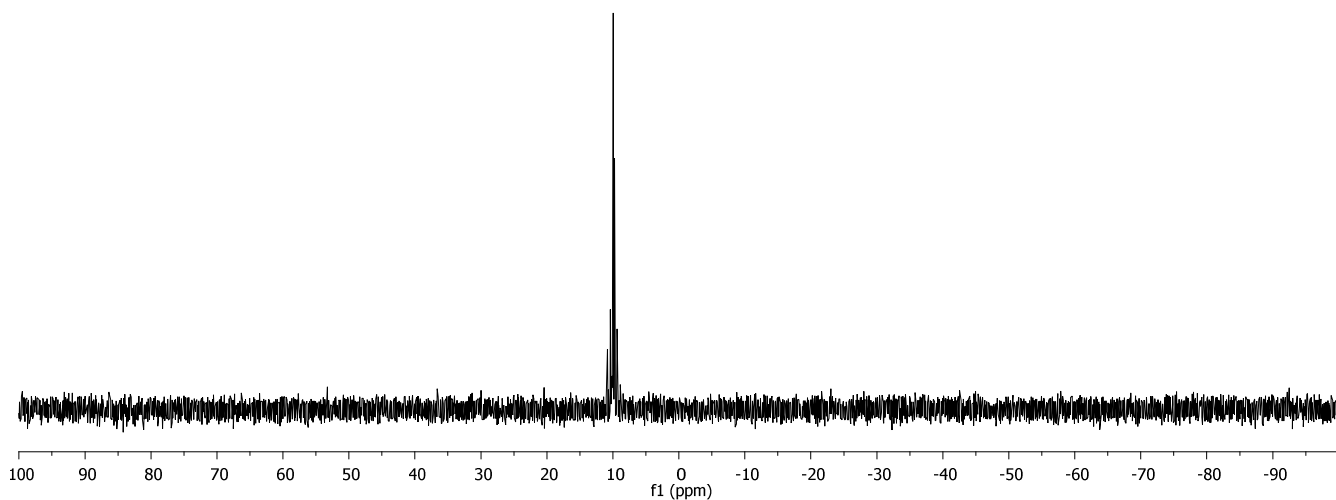

Figure S85.  $^{31}\text{P}$  NMR spectrum of compound **21** ( $\text{CDCl}_3$ , 122MHz)

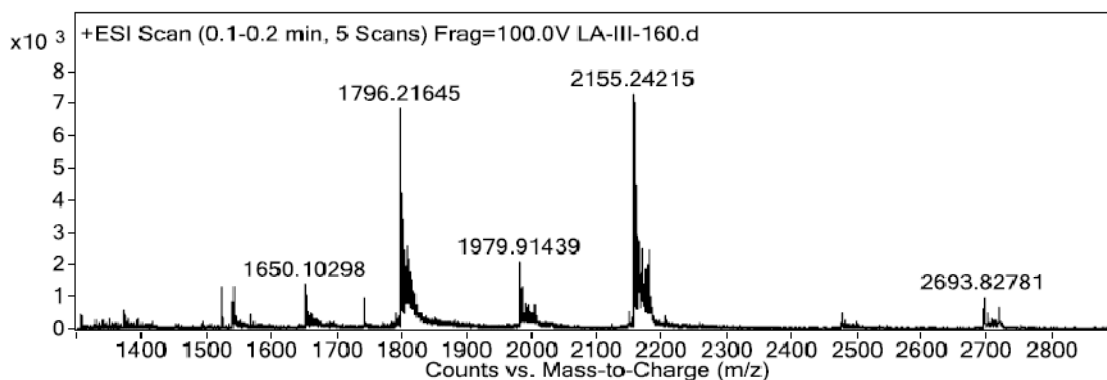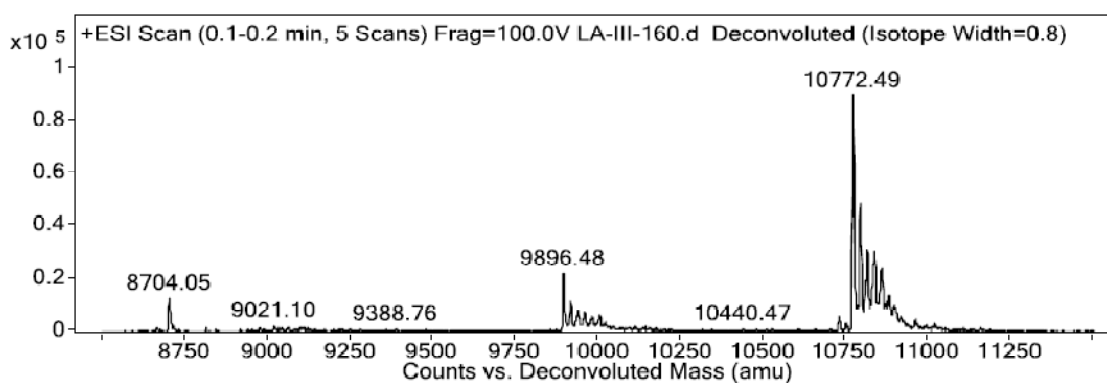

Figure S86. ESI<sup>+</sup>-MS spectrum (deconvolution) of compound 21

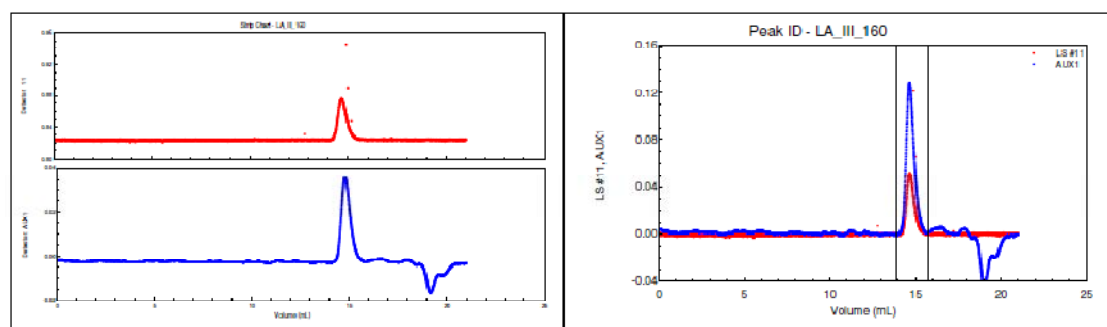

Polydispersity(Mw/Mn) : 1.061±0.144 (14%)  
 Polydispersity(Mz/Mn) : 2.291±0.838 (37%)

Molar Mass Moments (g/mol)  
 Mn : 1.386e+04 (9%)  
 Mw : 1.471e+04 (10%)  
 Mz : 3.176e+04 (35%)

Figure S87. GPC trace (in THF) for compound 21

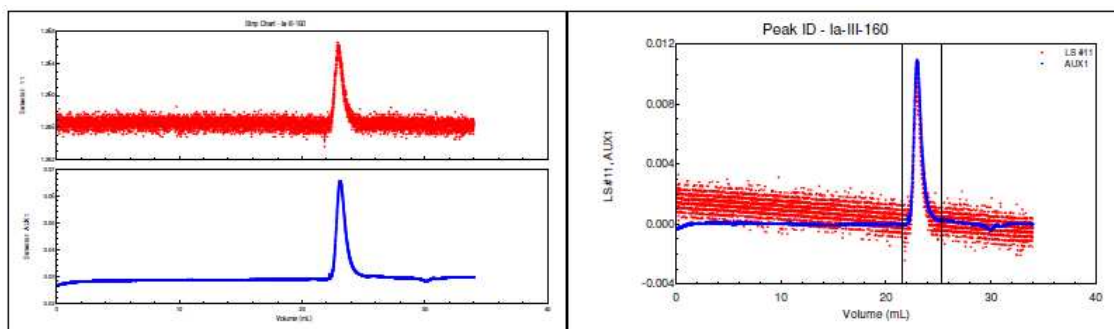

Polydispersity(Mw/Mn) : 1.023±0.187 (18%)

Polydispersity(Mz/Mn) : 1.051±0.333 (32%)

Molar Mass Moments (g/mol)

Mn : 1.018e+04 (13%)

Mw : 1.041e+04 (12%)

Mz : 1.070e+04 (28%)

Figure S88. GPC trace (in CHCl<sub>3</sub>/Et<sub>3</sub>N (1%)) for compound 21

## Hydroxylated dumbbell-shape decavalent glycocluster **22**

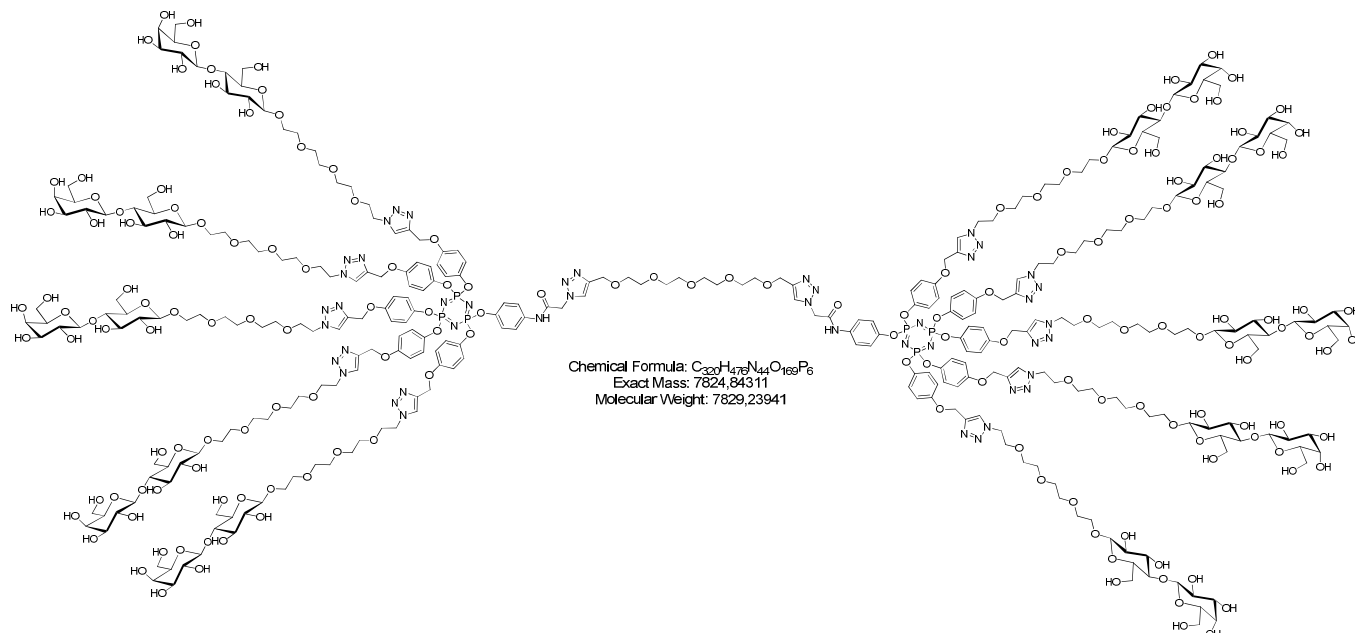

Acetylated compound **21** (28.0 mg, 2.60  $\mu\text{mol}$ ) was dissolved in a dry mixture of MeOH/DCM (5 mL, 4:1) and a solution of sodium methoxide (1M in MeOH, 5  $\mu\text{L}$  every 20 minutes until precipitation) was added. An additional 100  $\mu\text{L}$  was then injected and the heterogeneous reaction mixture was stirred at room temperature for 18 hours. The solvent was then removed with a Pasteur pipette and another dry mixture of MeOH/DCM (5 mL, 4:1) is added to the residual oil. A vigorous agitation is maintained for an additional 15 min. period. After removal of the solvents with a Pasteur pipette, 2 mL of dry MeOH were added to the viscous residue under agitation. After 15 min., the MeOH was removed and the residue was dissolved in 3 mL of  $\text{H}_2\text{O}$ , and the pH was adjusted to 7 with addition of ion-exchange resin (Amberlite IR 120  $\text{H}^+$ ). After filtration, the solvent was removed under *vacuum* with rotary evaporator, lyophilized to yield the fully deprotected derivative **22** as an off-white solid (18.5 mg, 2.55  $\mu\text{mol}$ , **98%**).

$^1\text{H}$  NMR (600 MHz,  $\text{D}_2\text{O}$ ,  $\delta$  ppm): 7.99 (s, 12H,  $H_{\text{triazole}}$ ), 7.28 (br s, 4H,  $\text{CH}_b$ ), 6.75-6.50 (m, 44H,  $\text{CH}_{\text{ar}}$ ), 5.29 (br s, 4H,  $\text{NCH}_2\text{CO}$ ), 4.96 (br s, 20H,  $\text{C}_q\text{CH}_2\text{O}$ ), 4.53-4.39 (m, 44H,  $\text{N}_{\text{triazole}}\text{CH}_2\text{CH}_2$ ,  $\text{C}_{\text{q-triazole}}\text{CH}_2\text{O}$ ,  $H_{1\text{glc}}$ ,  $H_{1\text{gal}}$ ), 3.90 (m, 30H,  $\text{OCH}_2\text{CH}_2\text{N}$ ,  $\text{LacOCHHCH}_2$ ), 3.82-3.47 (m, 236H,  $H_{3\text{glc}}$ ,  $H_{2\text{gal}}$ ,  $H_{3\text{gal}}$ ,  $H_{6\text{bglc}}$ ,  $H_{4\text{gal}}$ ,  $H_{6\text{agal}}$ ,  $H_{6\text{bgal}}$ ,  $H_{6\text{aglc}}$ ,  $H_{5\text{gal}}$ ,  $H_{5\text{glc}}$ ,  $H_{4\text{glc}}$ ,  $\text{LacOCHHCH}_2$ ,  $\text{OCH}_2$ ), 3.33 ( $t_{\text{app}}$ , 10H,  $H_{2\text{glc}}$ ).

$^{13}\text{C}$  NMR (75 MHz,  $\text{D}_2\text{O}$ ,  $\delta$  ppm): 165.3 ( $\text{C}=\text{O}$ ), 156.3 ( $\text{C}_a$ ), 144.8 ( $\text{C}_d'$ ), 144.5 ( $\text{C}_d$ ), 143.7 ( $\text{C}_{\text{triazole}=\text{CH}}$ ), 143.7 ( $\text{C}_{\text{triazole}=\text{CH}}$ ), 126.8 ( $\text{C}_a$ ), 125.9 ( $\text{C}_{\text{triazole}=\text{CH}}$ ), 122.4 ( $\text{C}_{\text{triazole}=\text{CH}}$ ), 121.8 ( $\text{C}_c + \text{C}_b' + \text{C}_c'$ ), 116.2 ( $\text{C}_b$ ), 115.1 ( $\text{C}_b$ ), 103.7 ( $\text{C}_{1\text{gal}}$ ), 102.8 ( $\text{C}_{1\text{glc}}$ ), 79.1 ( $\text{C}_{4\text{glc}}$ ), 76.0 ( $\text{C}_{3\text{glc}}$ ), 75.4 ( $\text{C}_{5\text{glc}}$ ), 75.0 ( $\text{C}_{5\text{gal}}$ ), 73.5 ( $\text{C}_{2\text{glc}}$ ), 73.2 ( $\text{C}_{3\text{gal}}$ ), 71.6 ( $\text{C}_{2\text{gal}}$ ), 70.3, 70.2, 70.0, 69.4, ( $\text{OCH}_2$ ), 69.3 ( $\text{C}_{4\text{gal}}$ ), 69.2 ( $\text{OCH}_2$ ), 63.8 ( $\text{C}_{\text{q-triazole}}\text{CH}_2\text{OCH}_2$ ), 62.0 ( $\text{OCH}_2\text{C}=\text{C}$ ), 61.7 ( $\text{C}_{6\text{glc}}$ ), 60.7 ( $\text{C}_{6\text{gal}}$ ), 53.2 ( $\text{N}_{\text{triazole}}\text{CH}_2\text{CO}$ ), 50.7 ( $\text{NCH}_2$ ).

$^{31}\text{P}$  NMR (122 MHz,  $\text{D}_2\text{O}$ ,  $\delta$  ppm): 10.2 (s, 6P).

$m/z$  (ESI $^+$ -MS) for  $\text{C}_{320}\text{H}_{476}\text{N}_{44}\text{O}_{169}\text{P}_3 = 7830.3$  [ $\text{M}+\text{H}$ ] $^+$ , found 7829.9 (After deconvolution).

NMR diffusion studies ( $\text{D}_2\text{O}$ ):  $D = 0.75 \times 10^{-10}$   $\text{m}^2/\text{s}$ ;  $d_s = 5.3$  nm.



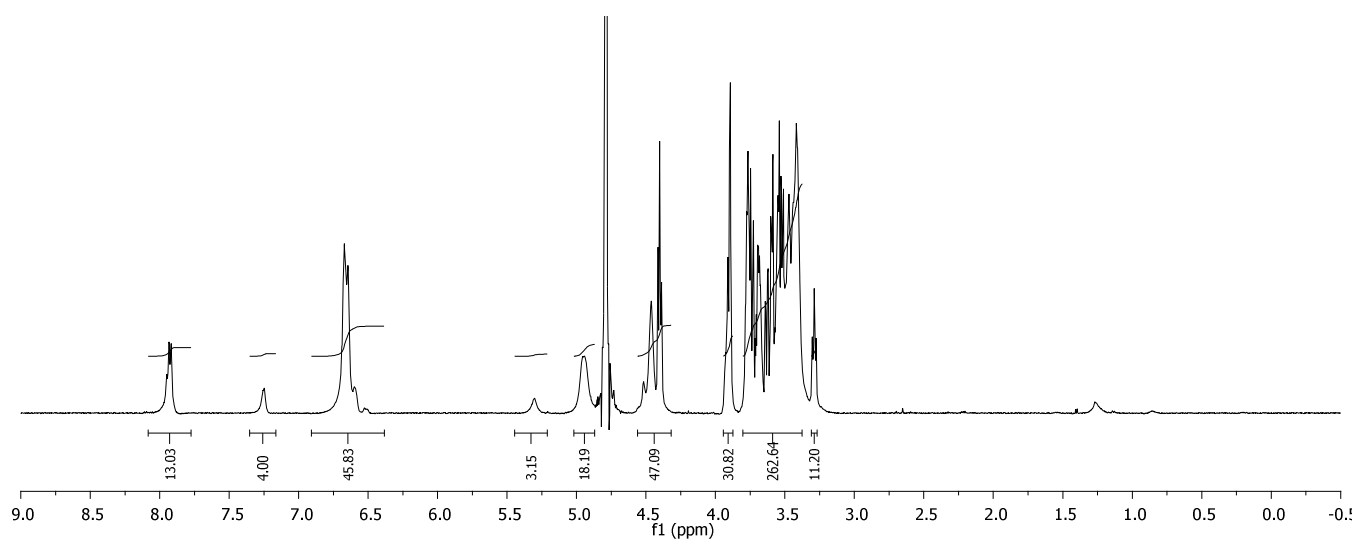

**Figure S89.**  $^1\text{H}$  NMR spectrum of compound **22** ( $\text{D}_2\text{O}$ , 600MHz)

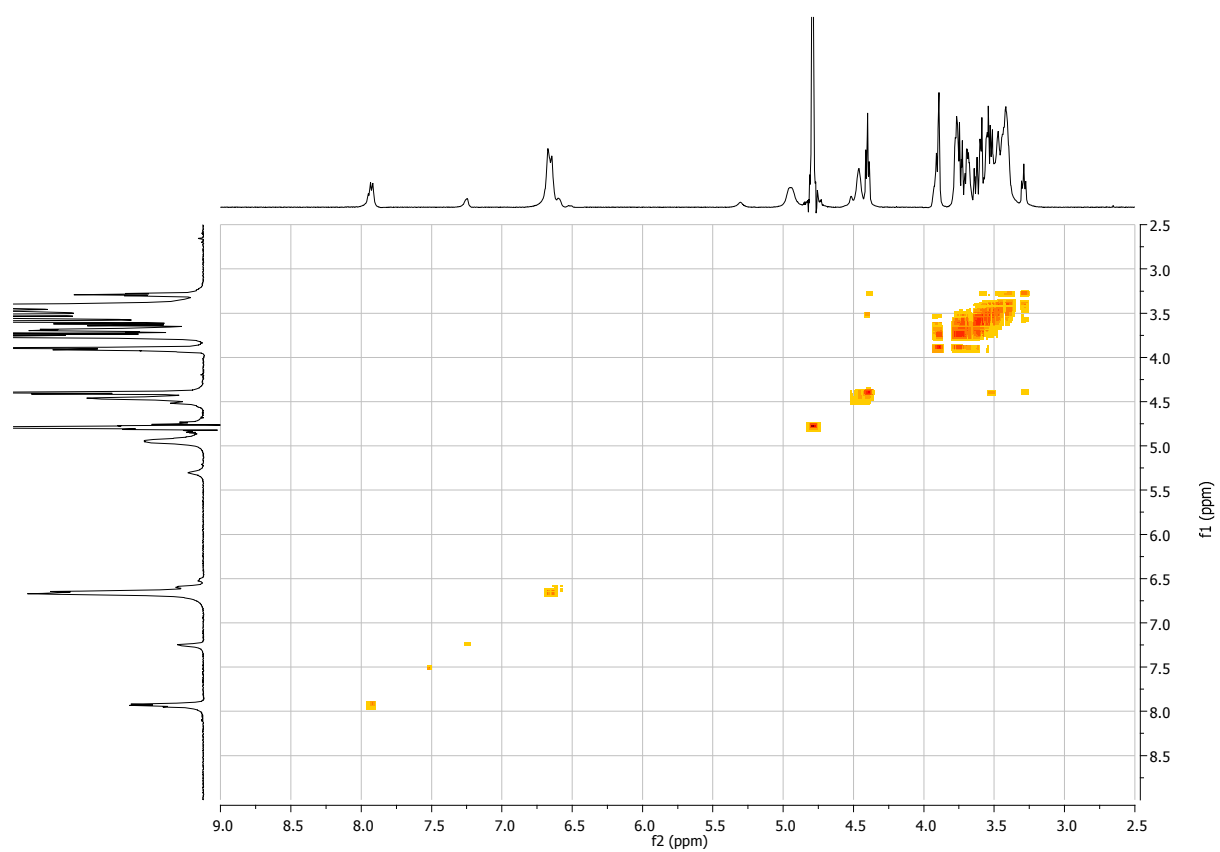

**Figure S90.** gCOSY spectrum of compound **22**

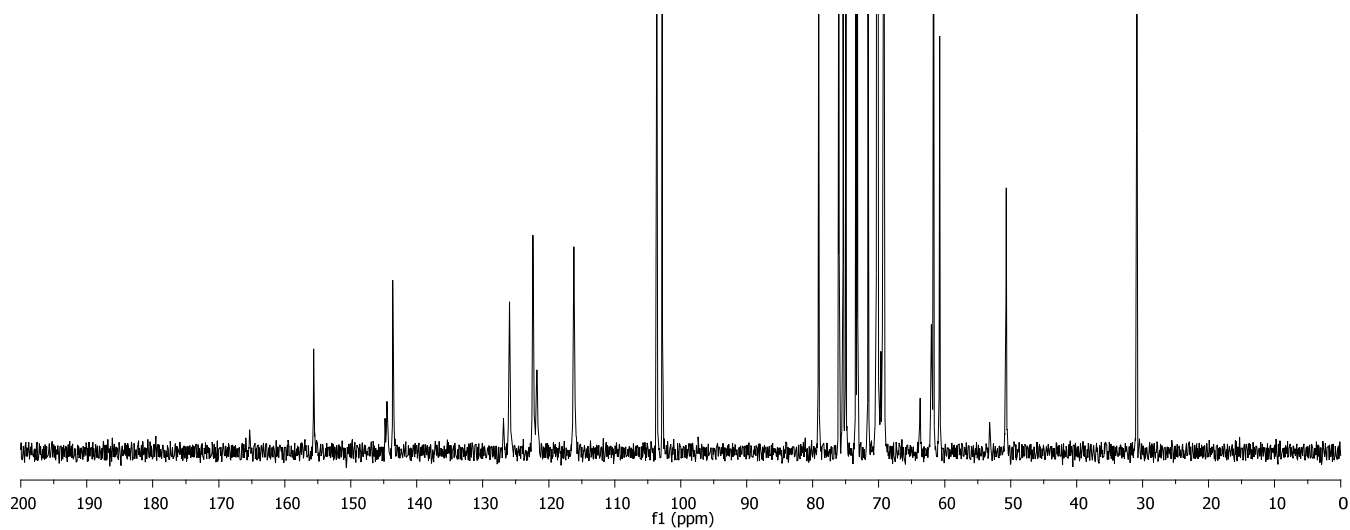

Figure S91.  $^{13}\text{C}$  NMR spectrum of compound **22** ( $\text{D}_2\text{O}$ , 75MHz, acetone as reference)

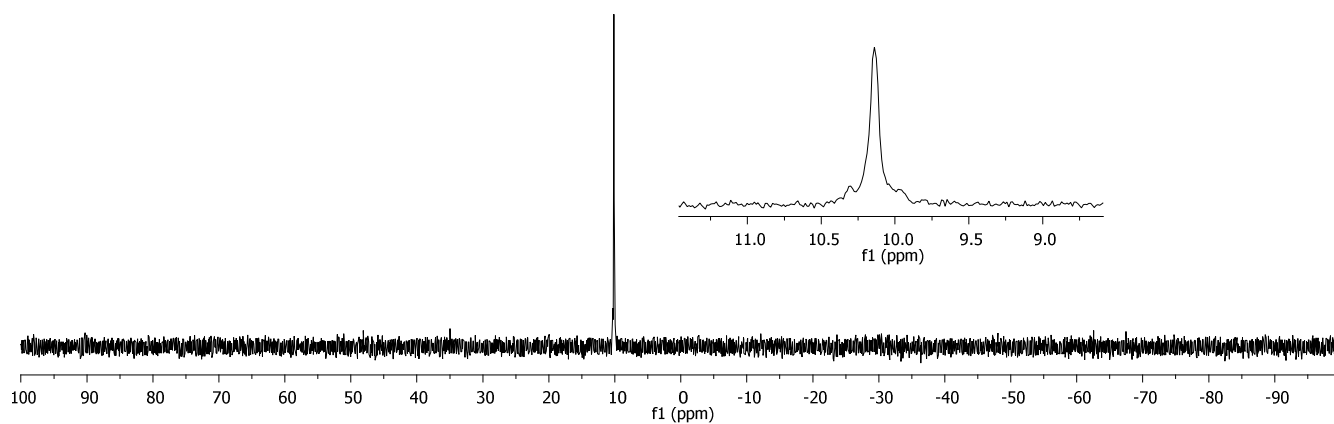

Figure S92.  $^{31}\text{P}$  NMR spectrum of compound **22** ( $\text{D}_2\text{O}$ , 122MHz)

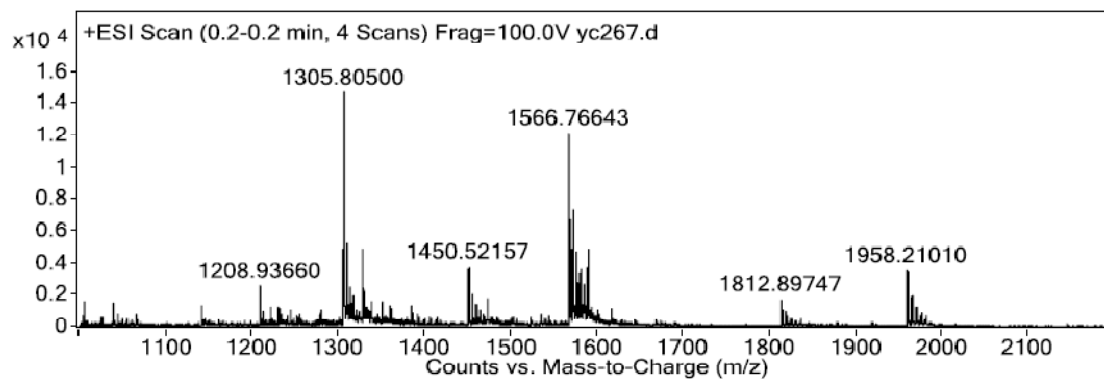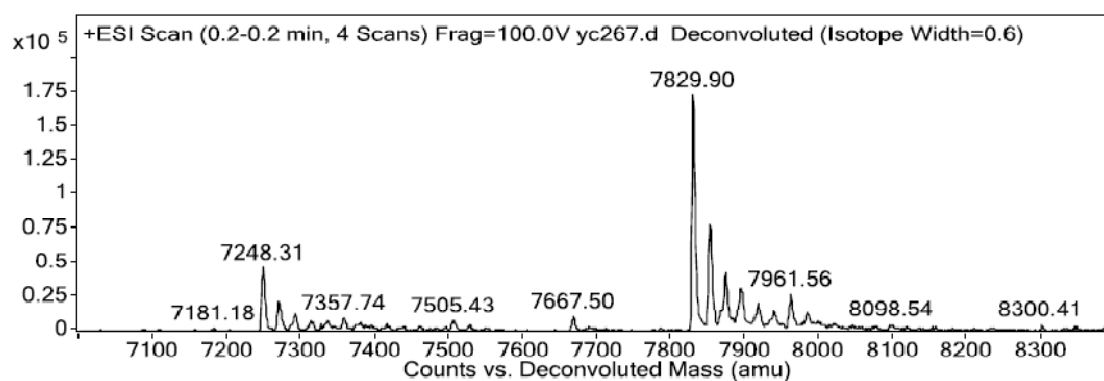

**Figure S93.** ESI<sup>+</sup>-MS spectrum (deconvolution) of compound **22**

## Heteromultifunctional Janus-type glyocluster **23**

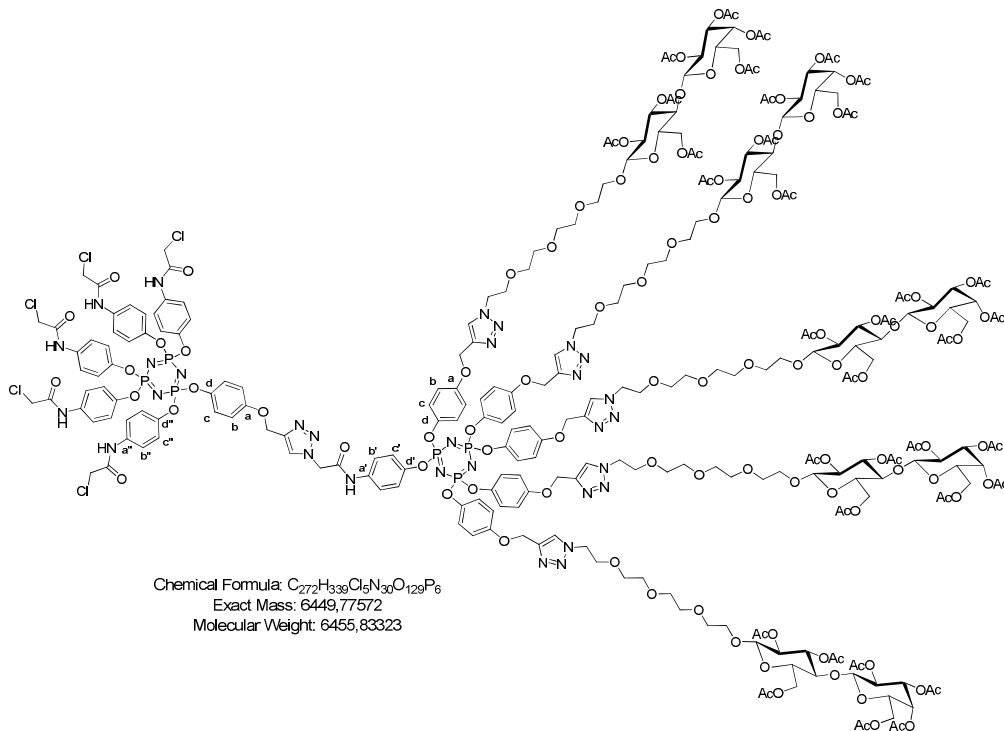

To a solution of propargylated derivative **9** (11.4 mg, 9.46  $\mu$ mol, 1.1 eq.) in a 1:1 mixture of H<sub>2</sub>O/THF<sub>anh</sub> (4 mL), were added azido dendron **15** (45.0 mg, 8.57  $\mu$ mol, 1.0 eq.), CuSO<sub>4</sub>·5H<sub>2</sub>O (23.0 mg, 92.0  $\mu$ mol, 11.1 eq.) and sodium ascorbate (11.9 mg, 92.0  $\mu$ mol, 11.1 eq.). While stirring, the mixture was first heated at 50°C for 3 hours in a 20 mL vial and at room temperature for additional 18 hours. Ethyl acetate (15 mL) was added and the solution was poured into a separatory funnel containing ethyl acetate (10 mL), washed with saturated aqueous NH<sub>4</sub>Cl (2×10 mL), water (10 mL) and brine (5 mL). Organics were collected, dried over Na<sub>2</sub>SO<sub>4</sub> and concentrated to dryness *in vacuo* with rotary evaporator. Purification by flash chromatography (SiO<sub>2</sub>, DCM/MeOH 100:0 to 85:15) afforded desired multivalent compound **23** (40 mg, 6.2  $\mu$ mol, **72%**) as an off-white foam

R<sub>f</sub> = 0.29, DCM/MeOH 94:6.

<sup>1</sup>H NMR (600 MHz, CDCl<sub>3</sub>,  $\delta$  ppm): 10.24 (s, 1H, NH<sub>core</sub>), 8.96 (s, 2H, NH<sub>ext</sub>), 8.60 (s, 2H, NH<sub>ext</sub>), 8.59 (s, 1H, NH<sub>ext</sub>), 8.05 (s, 1H, H<sub>triazole int</sub>), 7.90 (s, 2H, H<sub>triazole ext</sub>), 7.85 (s, 1H, H<sub>triazole ext</sub>), 7.84 (s, 2H, H<sub>triazole ext</sub>), 7.32 (d, 2H, CH<sub>b</sub>, <sup>3</sup>J = 8.6 Hz), 7.23 (m, 10H, CH<sub>b''</sub>), 6.98 (d, 2H, CH<sub>c</sub>), 6.91-6.44 (m, 34H, CH<sub>b</sub>, CH<sub>c</sub>, CH<sub>c''</sub>), 5.46 (s, 2H, N<sub>triazole</sub>CH<sub>2</sub>CONH), 5.33 (br s, 5H, H<sub>4gal</sub>), 5.18-5.08 (m, 22H, H<sub>3glc</sub>, C<sub>q</sub> triazole CH<sub>2</sub>O, H<sub>2gal</sub>), 4.94 (d<sub>app</sub>, 5H, H<sub>3gal</sub>), 4.86 (m, 5H, H<sub>2glc</sub>), 4.55-4.46 (m, 25H, CH<sub>2</sub>N, H<sub>1glc</sub>, H<sub>6aglc</sub>, H<sub>1gal</sub>), 4.22 (s, 6H; CH<sub>2</sub>Cl), 4.18 (s, 4H; CH<sub>2</sub>Cl), 4.11-4.06 (m, 15H, H<sub>6bglc</sub>, H<sub>6agal</sub>, H<sub>6bgal</sub>), 3.87-3.57 (m, 85H, H<sub>5gal</sub>, H<sub>5glc</sub>, H<sub>4glc</sub>, OCH<sub>2</sub>), 2.13-1.95 (m, 105H, COCH<sub>3</sub>).

<sup>13</sup>C NMR (150 MHz, CDCl<sub>3</sub>,  $\delta$  ppm): 170.3, 170.2, 170.0, 169.9, 169.6, 169.5, 169.0 (7xs, COCH<sub>3</sub>), 164.6 (CONH), 164.5 (CONH), 163.8 (C=O), 155.3 (C<sub>a''</sub>), 155.2 + 155.2 (C<sub>a</sub>), 147.0 (C<sub>d''</sub>), 146.8 (C<sub>d'</sub>), 144.5 (C<sub>d</sub>), 144.5 (C<sub>d''</sub>), 144.2 (C<sub>d</sub>), 143.8 (C<sub>triazole int</sub>=CH), 143.7 (C<sub>triazole</sub>=CH), 143.2 (C<sub>triazole</sub>=CH), 134.6 (C<sub>a''</sub>), 134.5 (C<sub>a'</sub>), 124.7 (C<sub>triazole int</sub>=CH), 124.4 (C<sub>triazole</sub>=CH), 124.0 (C<sub>triazole</sub>=CH), 122.0 (C<sub>b''</sub>), 121.9 (C<sub>b''</sub>), 121.9 (C<sub>c</sub>), 121.8 (C<sub>c</sub>), 121.7 (C<sub>b'</sub>), 121.6 (C<sub>c</sub>), 121.2

(C<sub>c'</sub>), 121.1 (C<sub>c'</sub>), 120.9 (C<sub>c'</sub>), 120.4 (C<sub>c''</sub>), 120.3 (C<sub>c''</sub>), 115.3 (C<sub>b</sub>), 115.2 (C<sub>b</sub>), 115.0 (C<sub>b</sub>), 100.9 (C<sub>1gal</sub>), 100.4 (C<sub>1glc</sub>), 76.1 (C<sub>4glc</sub>), 72.6 (C<sub>3glc</sub>), 72.5 (C<sub>5glc</sub>), 72.4 (C<sub>2glc</sub>), 71.5 (C<sub>3gal</sub>), 70.8 (C<sub>5gal</sub>), 70.5, 70.4, 70.4, 70.3, 70.3, 70.3, 70.1, 70.1, 69.2, 69.2 (OCH<sub>2</sub>), 68.9 (C<sub>2gal</sub>), 68.9 (OCH<sub>2</sub>), 66.5 (C<sub>4gal</sub>), 62.1 (OCH<sub>2</sub>C=C), 61.8 (C<sub>6glc</sub>), 61.6 (C<sub>6gal</sub>), 60.6 (OCH<sub>2</sub>), 52.9 (N<sub>triazole</sub>CH<sub>2</sub>CONH), 50.3 (NCH<sub>2</sub>), 50.2 (NCH<sub>2</sub>), 43.2 (CH<sub>2</sub>Cl), 43.1 (CH<sub>2</sub>Cl), 20.7, 20.7, 20.6, 20.5, 20.5, 20.4 (7xs, COCH<sub>3</sub>).

<sup>31</sup>P NMR (122 MHz, CDCl<sub>3</sub>, δ ppm): 10.9-8.5 (m, 6P, P-O).

*m/z* (ESI<sup>+</sup>-HRMS) for C<sub>272</sub>H<sub>339</sub>Cl<sub>5</sub>N<sub>30</sub>O<sub>129</sub>P<sub>6</sub>= 1636.6848 [M+4Na]<sup>4+</sup>; found 1636.6855, 2151.9342 [M+3Na]<sup>3+</sup>, found 2151.9363.

GPC measurements (THF): M<sub>w</sub> = 7981 ; M<sub>n</sub> = 7889 , PDI (M<sub>w</sub>/M<sub>n</sub>) = 1.012.

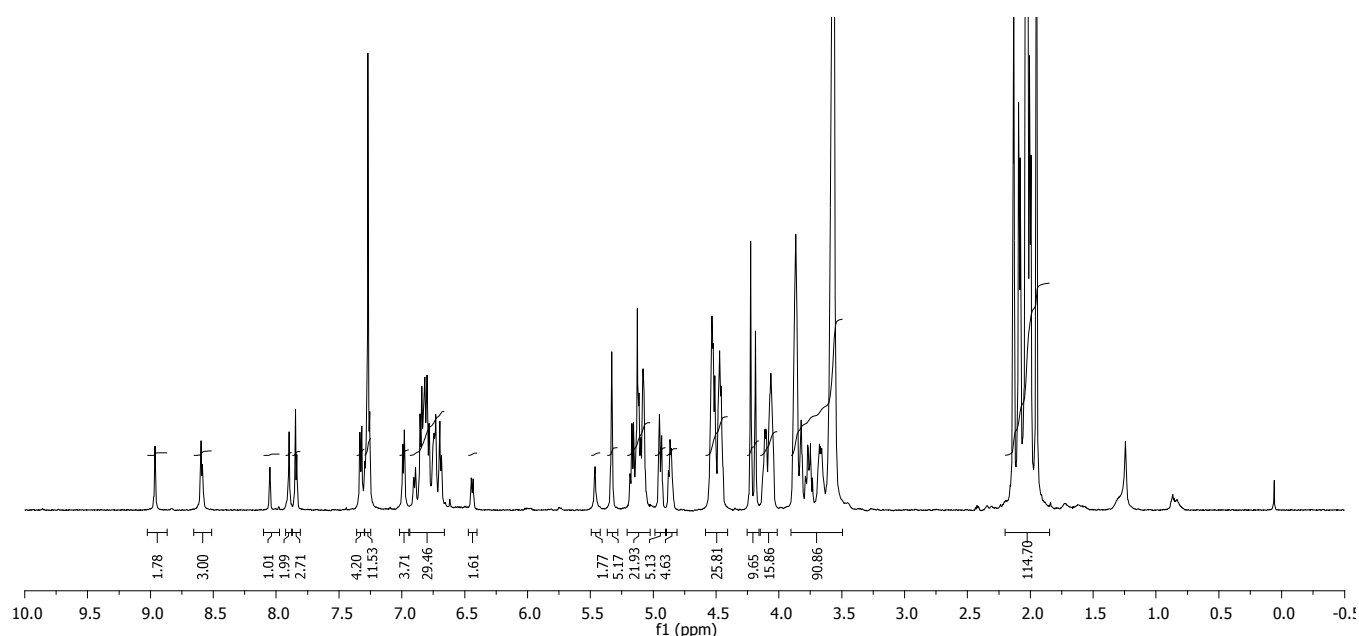

Figure S94. <sup>1</sup>H NMR spectrum of compound 23 (CDCl<sub>3</sub>, 600MHz)

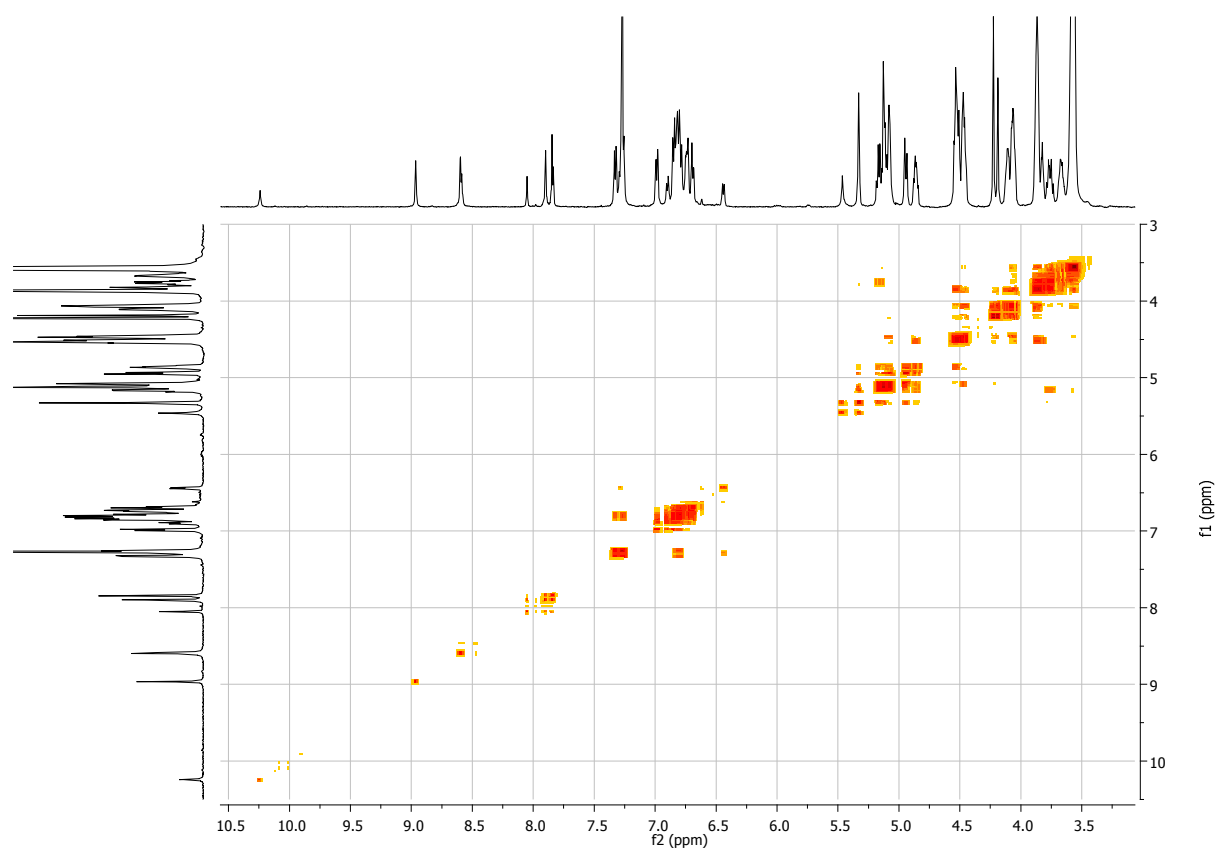

Figure S95. gCOSY spectrum of compound **23**

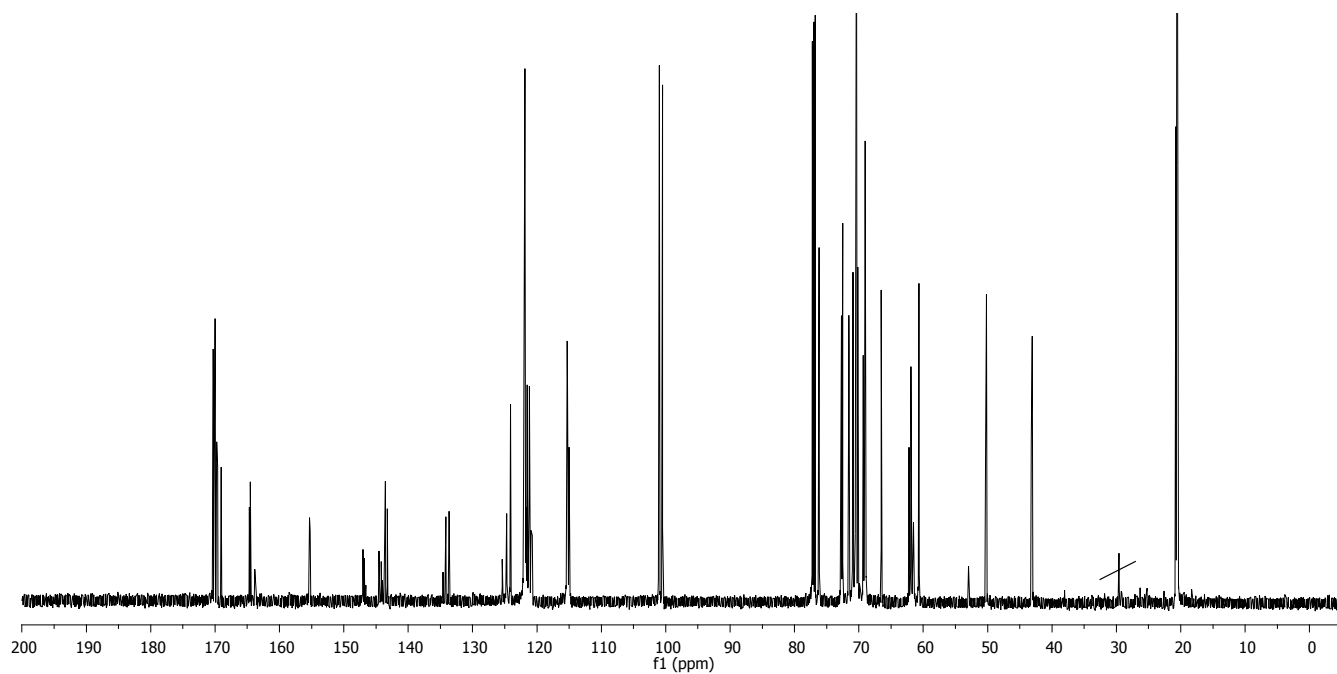

Figure S96.  $^{13}\text{C}$  NMR spectrum of compound **23** ( $\text{CDCl}_3$ , 150MHz)

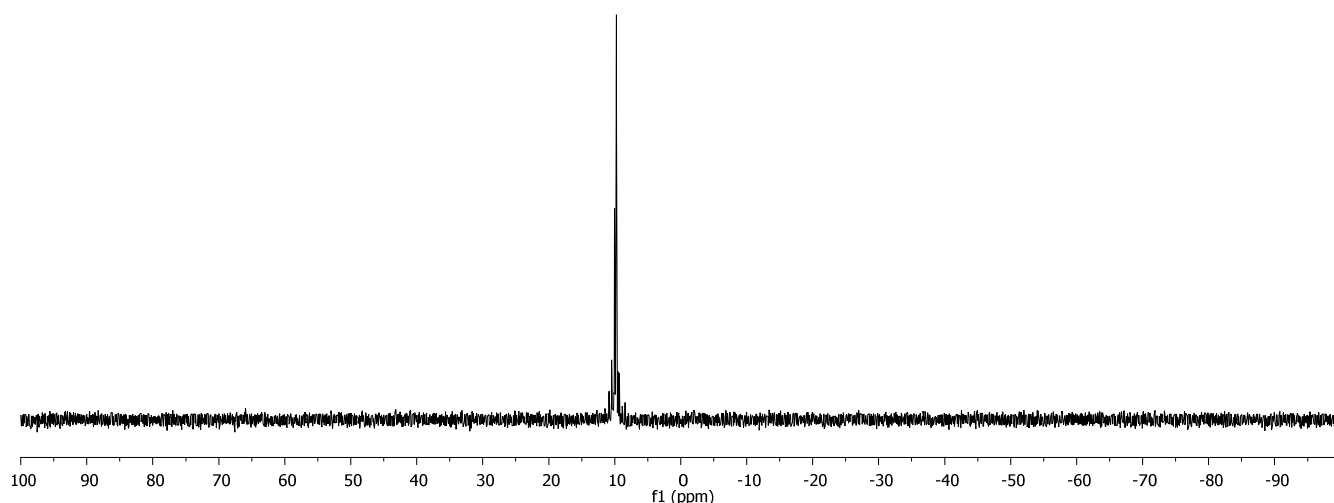

Figure S97.  $^{31}\text{P}$  NMR spectrum of compound **23** ( $\text{CDCl}_3$ , 122MHz)

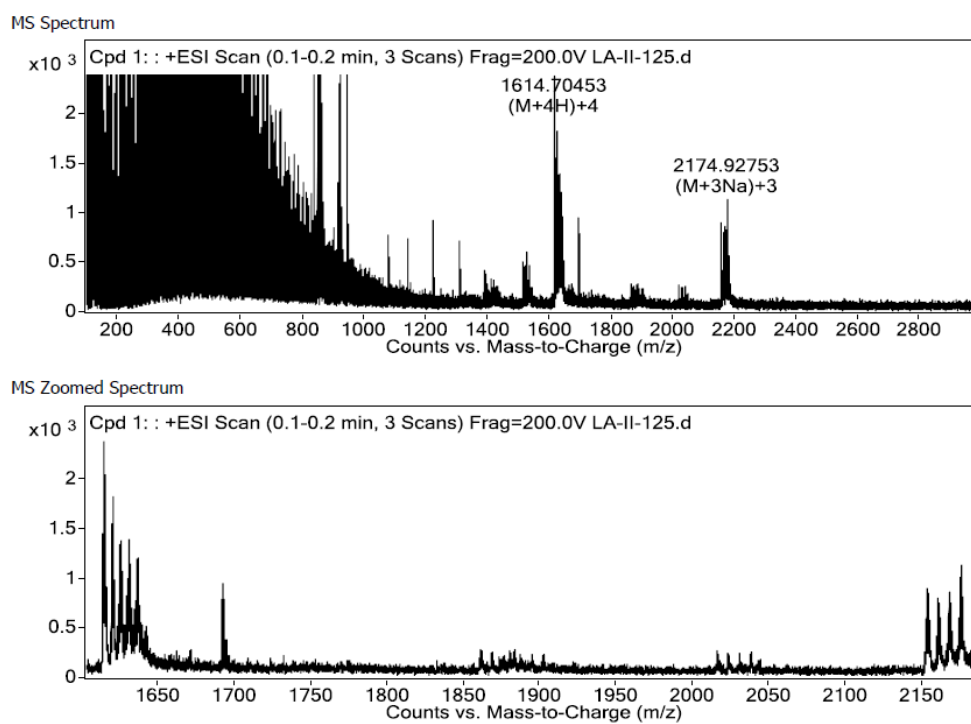

MS Spectrum Peak List

| Ion       | Formula                                                                                                           | Abund  | Observed m/z | Calc m/z   | Diff(ppm) |
|-----------|-------------------------------------------------------------------------------------------------------------------|--------|--------------|------------|-----------|
| (M+4Na)+4 | C <sub>272</sub> H <sub>339</sub> Cl <sub>5</sub> N <sub>30</sub> Na <sub>4</sub> O <sub>129</sub> P <sub>6</sub> | 1052.5 | 1636.68549   | 1636.68481 | 0.68      |
| (M+3H)+3  | C <sub>272</sub> H <sub>342</sub> Cl <sub>5</sub> N <sub>30</sub> O <sub>129</sub> P <sub>6</sub>                 | 576.1  | 2151.93629   | 2151.93423 | 2.07      |
| (M+3Na)+3 | C <sub>272</sub> H <sub>339</sub> Cl <sub>5</sub> N <sub>30</sub> Na <sub>3</sub> O <sub>129</sub> P <sub>6</sub> | 849.8  | 2173.91742   | 2173.91617 | 1.25      |

Figure S98. ESI<sup>+</sup>-HRMS spectrum of compound **23**

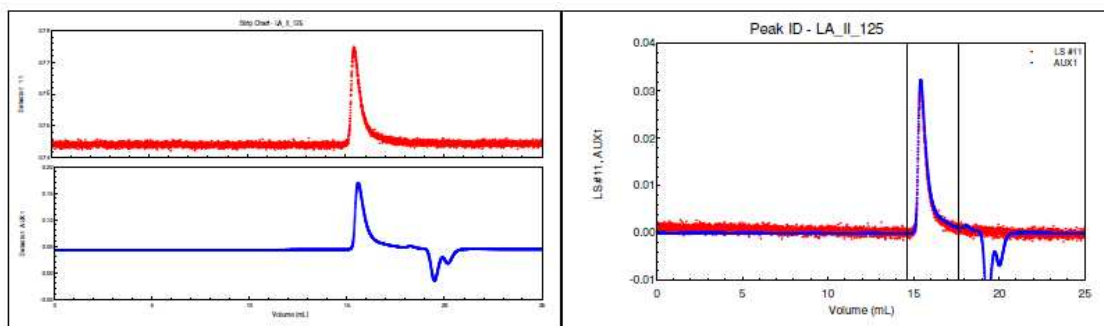

**Polydispersity(Mw/Mn)** : 1.012±0.129 (13%)  
**Polydispersity(Mz/Mn)** : 1.192±0.479 (40%)

**Molar Mass Moments (g/mol)**  
**Mn** : 7.889e+03 (8%)  
**Mw** : 7.981e+03 (9%)  
**Mz** : 9.403e+03 (39%)

**Figure S99.** GPC trace (in THF) for compound **23**



## Protected pentadecavalent glycodendrimer **25**

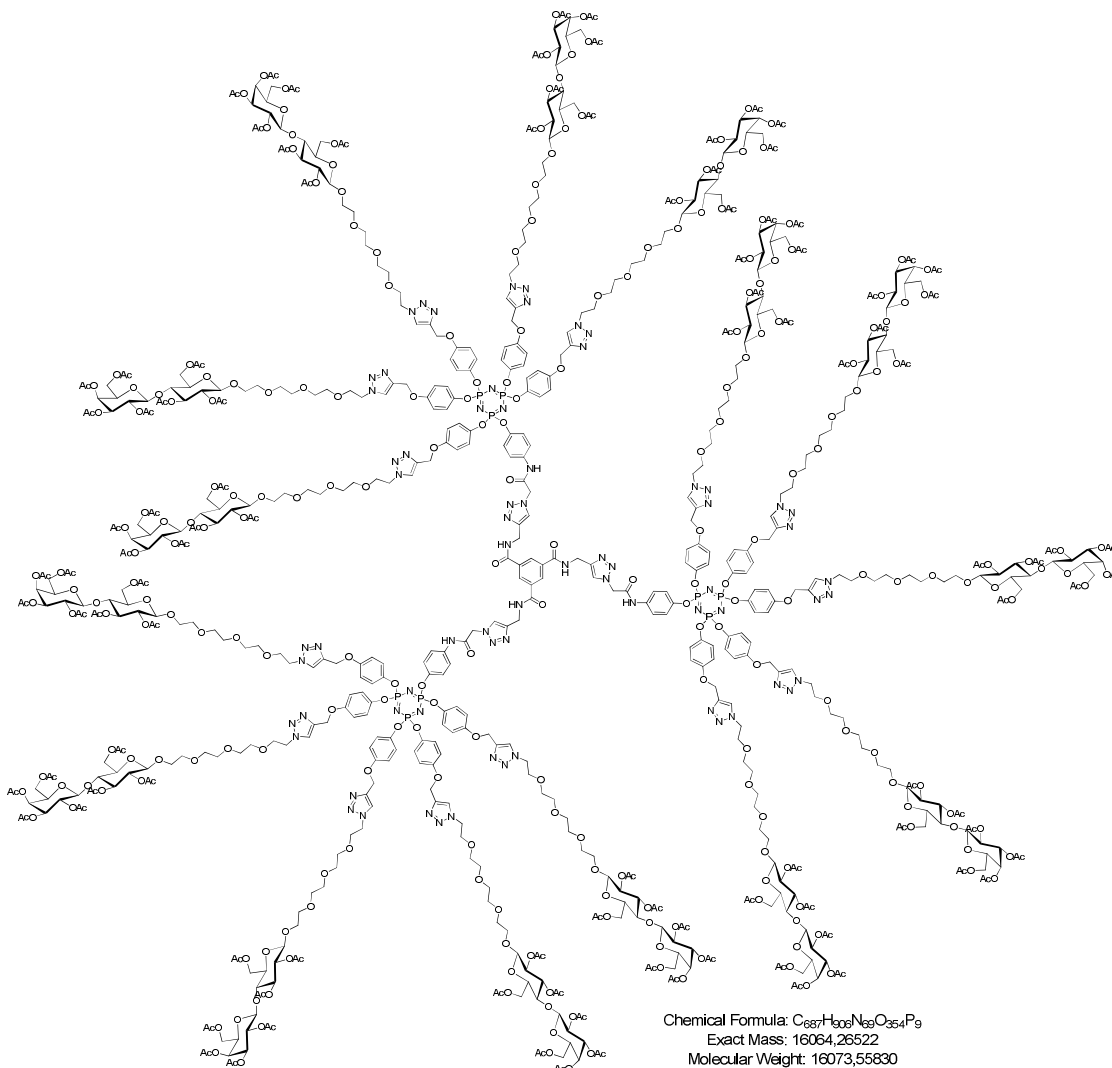

To a solution of known tripropargylated core **24**<sup>6</sup> (1.27 mg, 3.91  $\mu\text{mol}$ , 1.0 eq.) in a 1:1 mixture of  $\text{H}_2\text{O}/\text{THF}_{\text{anh}}$  (4 mL), were added azido dendron derivative **15** (80 mg, 0.015 mmol, 3.9 eq.),  $\text{CuSO}_4 \cdot 5\text{H}_2\text{O}$  (7.8 mg, 0.031 mmol, 8.0 eq.) and sodium ascorbate (6.2 mg, 0.031 mmol, 8.0 eq.). While stirring, the mixture was first heated at 50°C for 3 hours in a 20 mL vial and at room temperature for additional 18 hours. Ethyl acetate (15 mL) was added and the solution was poured into a separatory funnel containing ethyl acetate (10 mL), washed with saturated aqueous  $\text{NH}_4\text{Cl}$  (2×10 mL), water (10 mL) and brine (5 mL). Organics were collected, dried over  $\text{Na}_2\text{SO}_4$  and concentrated to dryness under vacuum with rotary evaporator. Purification by flash chromatography ( $\text{SiO}_2$ ,  $\text{DCM}/\text{MeOH}$  100:0 to 85:15) afforded desired multivalent compound **25** (54 mg, 3.4  $\mu\text{mol}$ , **86%**) as a white foam.

<sup>6</sup> Y. M. Chabre, D. Giguère, B. Blanchard, J. Rodrigue, S. Rocheleau, M. Neault, S. Rauthu, A. Papadopoulos, A. A. Arnold, A. Imberty and R. Roy, *Chem. Eur. J.*, 2011, **17**, 6545–6562.

$R_f = 0.38$ , DCM/MeOH 93:7.

$^1\text{H NMR}$  (600 MHz,  $\text{CDCl}_3$ ,  $\delta$  ppm): 10.1 (br s, 3H, NH), 8.49 (br s, 3H, NH), 7.98 (s, 3H,  $\text{CH}_{\text{core}}$ ), 7.91-7.83 (m, 18H,  $H_{\text{triazole}}$ ), 7.36-7.30 (m, 6H,  $\text{CH}_b$ ), 6.97-6.48 (m, 66H,  $\text{CH}_b$ ,  $\text{CH}_c$ ,  $\text{CH}_c$ ), 5.40 (br s, 6H,  $\text{N}_{\text{triazole}}\text{CH}_2\text{CONH}$ ), 5.32 (d<sub>app</sub>, 15H,  $H_{4\text{gal}}$ ), 5.20-5.04 (m, 60H,  $H_{3\text{glc}}$ ,  $\text{C}_q\text{CH}_2\text{O}$ ,  $H_{2\text{gal}}$ ), 4.93 (dd,  $^3J_{2,3} = 3.3$  Hz,  $^3J_{3,4} = 7.1$  Hz, 15H,  $H_{3\text{gal}}$ ), 4.87-4.82 (m, 15H,  $H_{2\text{glc}}$ ), 4.63 (br s, 6H,  $\text{CONHCH}_2\text{C}_q$ ), 4.54-4.42 (m, 75H,  $\text{CH}_2\text{N}$ ,  $H_{1\text{glc}}$ ,  $H_{6\text{aglc}}$ ,  $H_{1\text{gal}}$ ), 4.12-4.04 (m, 45H,  $H_{6\text{bglc}}$ ,  $H_{6\text{agal}}$ ,  $H_{6\text{bgal}}$ ), 3.86-3.54 (m, 255H,  $H_{5\text{gal}}$ ,  $H_{5\text{glc}}$ ,  $H_{4\text{glc}}$ ,  $\text{OCH}_2$ ), 2.11-1.92 (m, 315H,  $\text{COCH}_3$ ).

$^{13}\text{C NMR}$  (150 MHz,  $\text{CDCl}_3$ ,  $\delta$  ppm): 170.4, 170.3, 170.2, 170.1, 169.9, 169.7, 169.5 (7xs,  $\text{COCH}_3$ ), 165.0 ( $\text{NHC}=\text{O}_{\text{core}}$ ), 163.9 ( $\text{NHC}=\text{O}$ ), 155.3 ( $\text{C}_a$ ), 155.3 ( $\text{C}_a$ ), 146.5 ( $\text{C}_d$ ), 144.4 ( $\text{C}_d$ ), 144.1 ( $\text{C}_d$ ), 143.5 ( $\text{C}_{\text{triazole}}=\text{CH}$ ), 143.3 ( $\text{C}_{\text{triazole}}=\text{CH}$ ), 133.8 ( $\text{C}_{q\text{-core}}$ ), 129.1 ( $\text{CH}_{\text{core}}$ ), 124.7 ( $\text{C}_{\text{triazole}}=\text{CH}$ ), 124.5 ( $\text{C}_a$ ), 124.1 ( $\text{C}_{\text{triazole}}=\text{CH}$ ), 121.8 ( $\text{C}_c$ ), 120.9 ( $\text{C}_c$ ), 120.7 ( $\text{C}_b$ ), 115.2 ( $\text{C}_b$ ), 115.1 ( $\text{C}_b$ ), 101.0 ( $\text{C}_{1\text{gal}}$ ), 100.5 ( $\text{C}_{1\text{glc}}$ ), 76.2 ( $\text{C}_{4\text{glc}}$ ), 72.7 ( $\text{C}_{3\text{glc}}$ ), 72.5 ( $\text{C}_{5\text{glc}}$ ), 71.5 ( $\text{C}_{2\text{glc}}$ ), 70.9 ( $\text{C}_{3\text{gal}}$ ), 70.5 ( $\text{C}_{5\text{gal}}$ ), 70.5, 70.4, 70.4, 70.3, 70.2, 70.1, 70.1, 69.3, 69.1, 69.0 ( $\text{OCH}_2$ ), 68.9 ( $\text{C}_{2\text{gal}}$ ), 68.9 ( $\text{OCH}_2$ ), 66.5 ( $\text{C}_{4\text{gal}}$ ), 62.1 ( $\text{OCH}_2\text{C}=\text{C}$ ), 61.9 ( $\text{C}_{6\text{glc}}$ ), 61.6 ( $\text{OCH}_2$ ), 60.7 ( $\text{C}_{6\text{gal}}$ ), 52.7 ( $\text{N}_{\text{triazole}}\text{CH}_2\text{CONH}$ ), 50.2 ( $\text{NCH}_2$ ), 50.1 ( $\text{NCH}_2$ ), 35.8 ( $\text{C}_{\text{core}}\text{CONHCH}_2\text{C}_{\text{triazole}}$ ), 29.6, 20.8, 20.7, 20.6, 20.5, 20.5, 20.4 (7xs,  $\text{COCH}_3$ ).

$^{31}\text{P NMR}$  (122 MHz,  $\text{CDCl}_3$ ,  $\delta$  ppm): 10.9-9.5 (m, 9P).

$m/z$  (ESI<sup>+</sup>-MS) for  $\text{C}_{687}\text{H}_{906}\text{N}_{69}\text{O}_{354}\text{P}_9 = 16074.6$  [ $M+H$ ]<sup>+</sup>; found 16074.1 (After deconvolution).

**NMR diffusion studies** ( $\text{CDCl}_3$ ):  $D = 1.65 \times 10^{-10}$  m<sup>2</sup>/s;  $d_s = 5.1$  nm.

**GPC measurements** (THF):  $M_w = 18970$ ;  $M_n = 18820$ , PDI ( $M_w/M_n$ ) = 1.008.

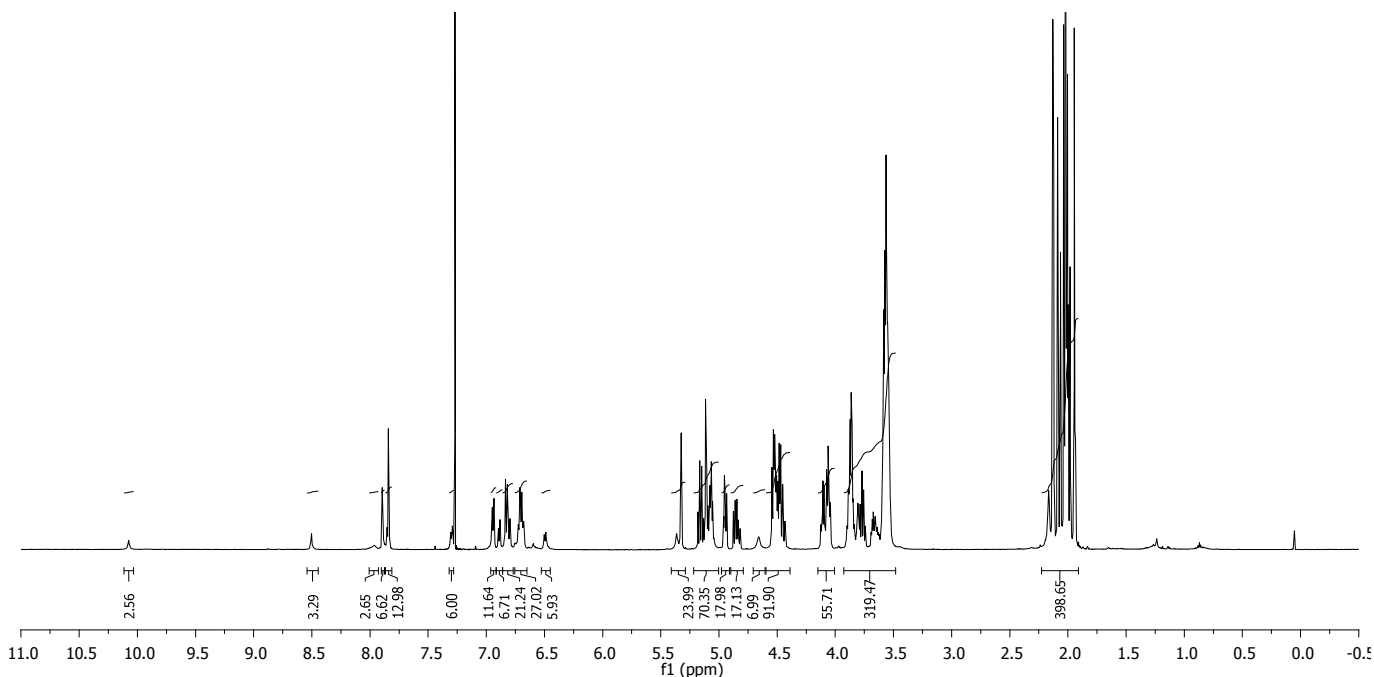

**Figure S100.**  $^1\text{H NMR}$  spectrum of compound **25** ( $\text{CDCl}_3$ , 600MHz)

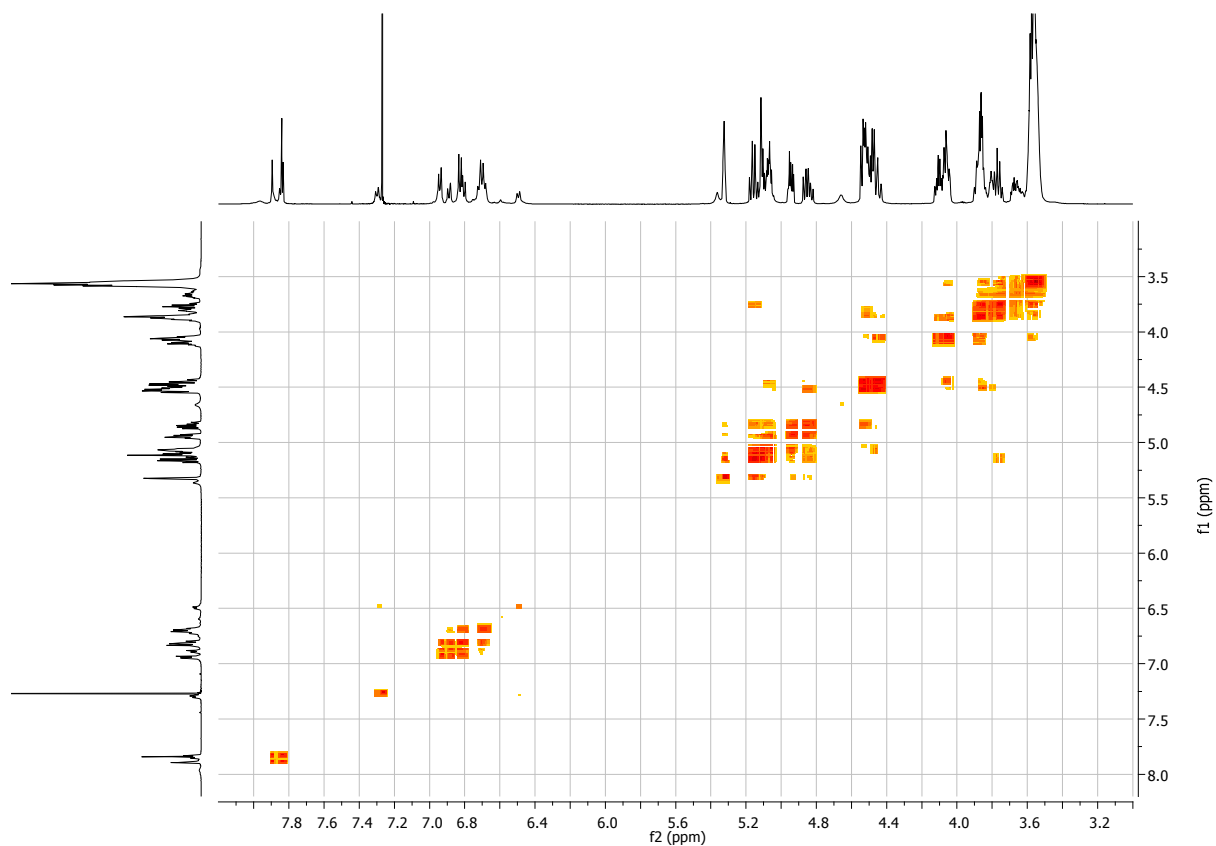

Figure S101. gCOSY spectrum of compound **25**

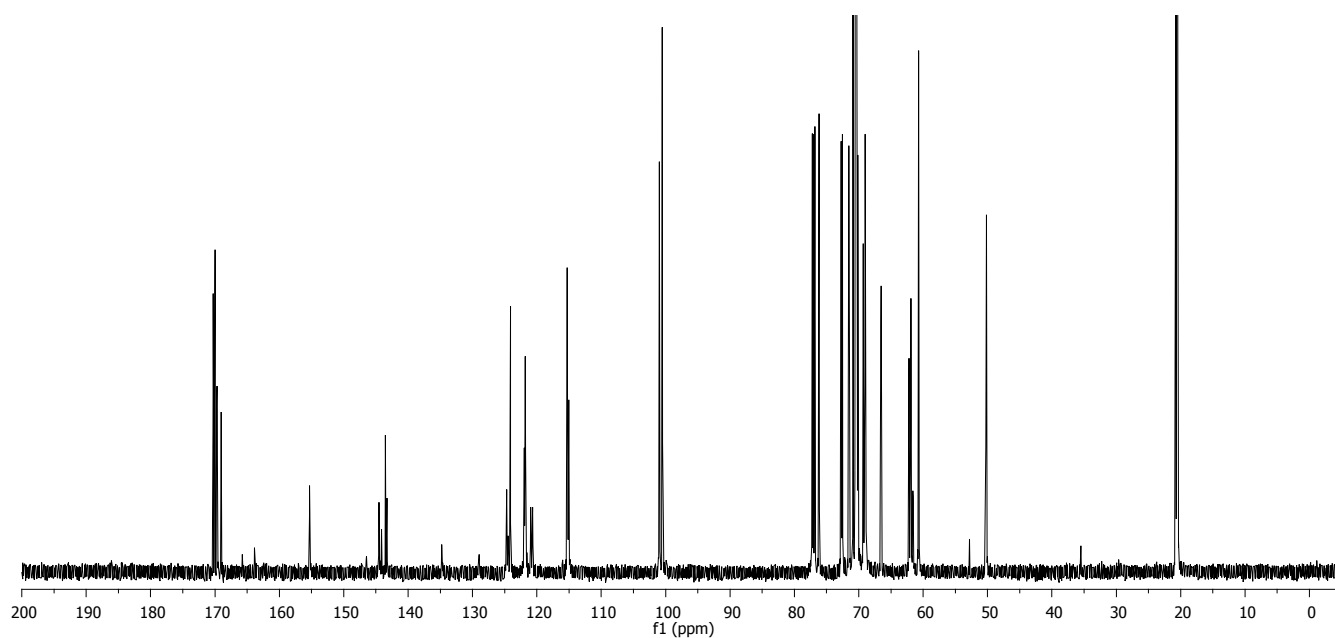

Figure S102.  $^{13}\text{C}$  NMR spectrum of compound **25** ( $\text{CDCl}_3$ , 150MHz)

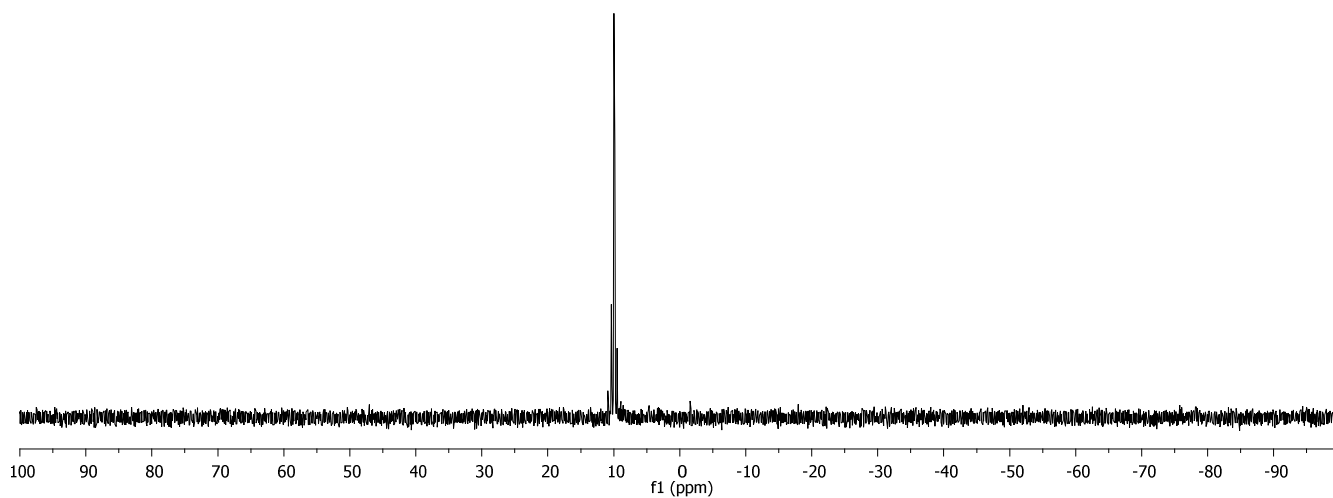

**Figure S103.**  $^{31}\text{P}$  NMR spectrum of compound **25** ( $\text{CDCl}_3$ , 122MHz)

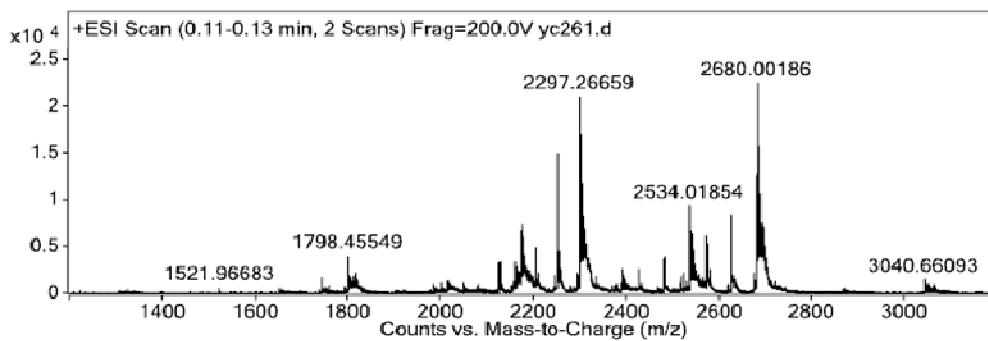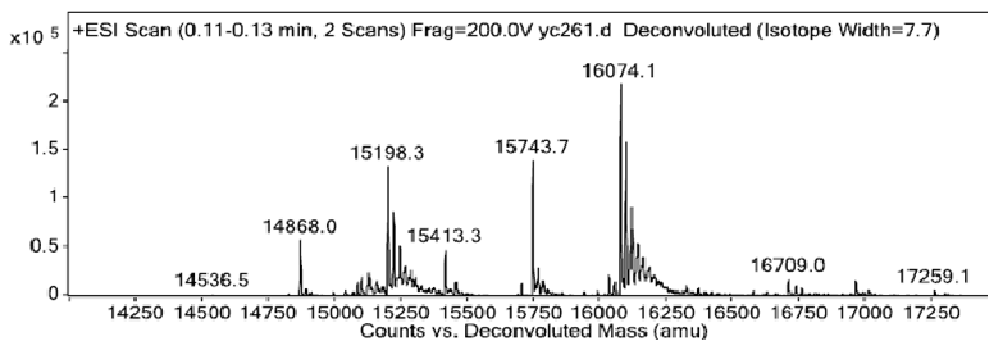

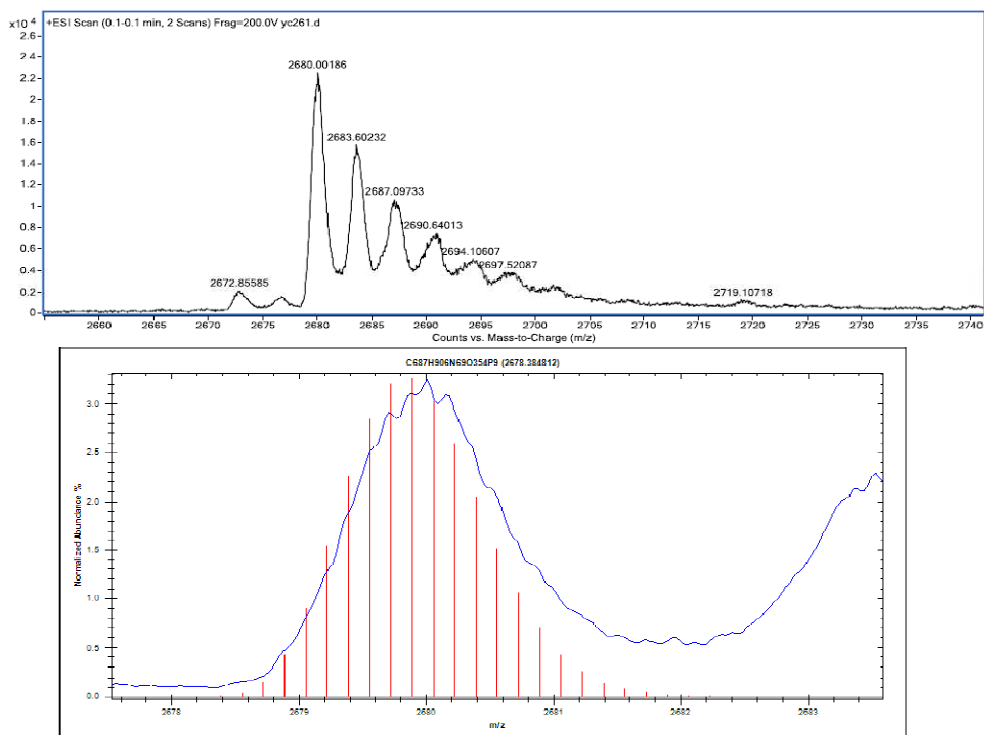

Figure S104. ESI<sup>+</sup>-MS spectra (deconvolution) of compound **25**

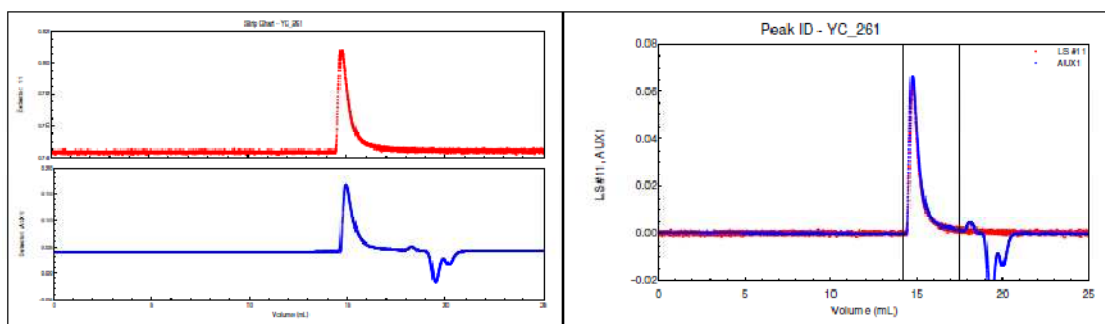

Polydispersity(Mw/Mn) : 1.008±0.126 (13%)  
 Polydispersity(Mz/Mn) : 1.014±0.221 (22%)

Molar Mass Moments (g/mol)  
 Mn : 1.882e+04 (8%)  
 Mw : 1.897e+04 (8%)  
 Mz : 1.909e+04 (19%)

Figure S105. GPC trace (in THF) for compound **25**

## Protected trivalent glycodendrimer **26**

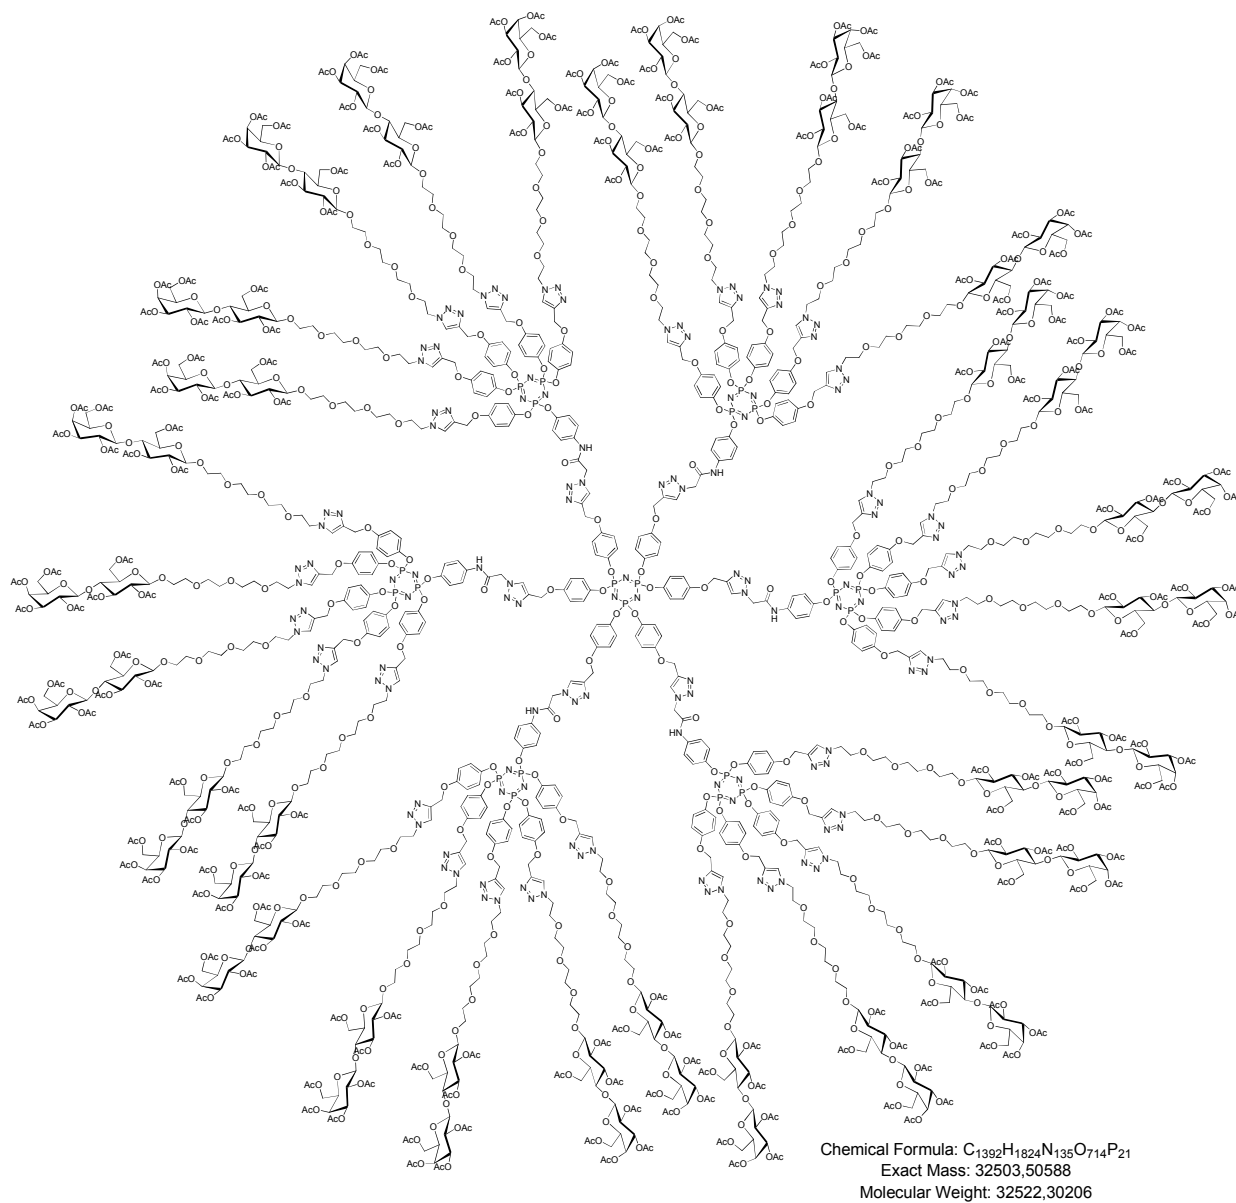

To a solution of hexapropargylated cyclotriphosphazene derivative **1** (2.40 mg, 2.36  $\mu\text{mol}$ , 1.0 eq.) in a 1:1 mixture of H<sub>2</sub>O/THF<sub>anh</sub> (5 mL), were added azido derivative **15** (100 mg, 19.0  $\mu\text{mol}$ , 8.1 eq.), CuSO<sub>4</sub>·5H<sub>2</sub>O (4.71 mg, 18.8  $\mu\text{mol}$ , 8.0 eq.) and sodium ascorbate (3.74 mg, 18.8  $\mu\text{mol}$ , 8.0 eq.). While stirring, the mixture was first heated at 50°C for 3 hours in a 20 mL vial and at room temperature for additional 18 hours. Ethyl acetate (15 mL) was added and the solution was poured into a separatory funnel containing ethyl acetate (10 mL), washed with saturated aqueous NH<sub>4</sub>Cl (2×10 mL), water (10 mL) and brine (5 mL). Organics were collected, dried over Na<sub>2</sub>SO<sub>4</sub> and concentrated to dryness *in vacuo* with rotary evaporator. Purification by flash chromatography (SiO<sub>2</sub>, DCM/MeOH 100:0 to 85:15) afforded desired multivalent compound **26** (59 mg, 1.81  $\mu\text{mol}$ , 77%) as a white foam.

$R_f = 0.42$ , DCM/MeOH 92:8.

$^1\text{H NMR}$  (600 MHz,  $\text{CDCl}_3$ ,  $\delta$  ppm): 10.1 (br s, 6H, NH), 7.98 (s, 6H,  $H_{\text{triazole}}$ ), 7.86-7.80 (m, 30H,  $H_{\text{triazole}}$ ), 7.36-7.30 (m, 12H,  $\text{CH}_b$ ), 6.97-6.54 (m, 156H,  $\text{CH}_b$ ,  $\text{CH}_c$ ,  $\text{CH}_c$ ), 5.40 (br s, 12H,  $\text{N}_{\text{triazole}}\text{CH}_2\text{CONH}$ ), 5.32 ( $d_{\text{app}}$ , 30H,  $H_{4\text{gal}}$ ), 5.17-5.04 (m, 132H,  $H_{3\text{glc}}$ ,  $\text{C}_q\text{CH}_2\text{O}$ ,  $H_{2\text{gal}}$ ), 4.93 (dd,  $^3J_{2,3} = 3.3$  Hz,  $^3J_{3,4} = 7.1$  Hz, 30H,  $H_{3\text{gal}}$ ), 4.87-4.82 (m, 30H,  $H_{2\text{glc}}$ ), 4.54-4.42 (m, 150H,  $\text{CH}_2\text{N}$ ,  $H_{1\text{glc}}$ ,  $H_{6\text{aglc}}$ ,  $H_{1\text{gal}}$ ), 4.12-4.04 (m, 90H,  $H_{6\text{bglc}}$ ,  $H_{6\text{agal}}$ ,  $H_{6\text{bgal}}$ ), 3.90-3.45 (510H,  $H_{5\text{gal}}$ ,  $H_{5\text{glc}}$ ,  $H_{4\text{glc}}$ ,  $\text{OCH}_2$ ), 2.11-1.92 (m, 630H,  $\text{COCH}_3$ ).

$^{13}\text{C NMR}$  (75 MHz,  $\text{CDCl}_3$ ,  $\delta$  ppm): 170.2, 170.2, 170.0, 169.9, 169.9, 169.7, 169.5 (7xs,  $\text{COCH}_3$ ), 163.9 (C=O), 155.2 ( $\text{C}_a$ ), 146.5 ( $\text{C}_d'$ ), 144.4 ( $\text{C}_d$ ), 144.1 ( $\text{C}_d$ ), 143.4 ( $\text{C}_{\text{triazole}}=\text{CH}$ ), 143.2 ( $\text{C}_{\text{triazole}}=\text{CH}$ ), 134.8 ( $\text{C}_a'$ ), 125.2 ( $\text{C}_{\text{triazole}}=\text{CH}$ ), 124.6 ( $\text{C}_{\text{triazole}}=\text{CH}$ ), 124.1 ( $\text{C}_{\text{triazole}}=\text{CH}$ ), 121.9 ( $\text{C}_c'$ ), 121.7 ( $\text{C}_b'$ ), 120.9 ( $\text{C}_c$ ), 120.7 ( $\text{C}_c$ ), 115.9 ( $\text{C}_b$ ), 115.2 ( $\text{C}_b$ ), 115.1 ( $\text{C}_b$ ), 101.0 ( $\text{C}_{1\text{gal}}$ ), 100.5 ( $\text{C}_{1\text{glc}}$ ), 76.2 ( $\text{C}_{4\text{glc}}$ ), 72.7 ( $\text{C}_{3\text{glc}}$ ), 72.5 ( $\text{C}_{5\text{glc}}$ ), 71.5 ( $\text{C}_{2\text{glc}}$ ), 70.9 ( $\text{C}_{3\text{gal}}$ ), 70.5 ( $\text{C}_{5\text{gal}}$ ), 70.5, 70.4, 70.4, 70.3, 70.2, 70.1, 70.1, 69.3, 69.1, 69.0 ( $\text{OCH}_2$ ), 68.9 ( $\text{C}_{2\text{gal}}$ ), 68.9 ( $\text{OCH}_2$ ), 66.5 ( $\text{C}_{4\text{gal}}$ ), 62.1 ( $\text{OCH}_2\text{C}=\text{C}$ ), 61.9 ( $\text{C}_{6\text{glc}}$ ), 61.6 ( $\text{OCH}_2$ ), 60.7 ( $\text{C}_{6\text{gal}}$ ), 52.7 ( $\text{N}_{\text{triazole}}\text{CH}_2\text{CONH}$ ), 50.2 ( $\text{NCH}_2$ ), 50.1 ( $\text{NCH}_2$ ), 29.6, 20.8, 20.7, 20.6, 20.5, 20.5, 20.4 (7xs,  $\text{COCH}_3$ ).

$^{31}\text{P NMR}$  (122 MHz,  $\text{CDCl}_3$ ,  $\delta$  ppm): 10.2-9.7 (m, 21P).

$m/z$  (ESI<sup>+</sup>-MS) for  $\text{C}_{1392}\text{H}_{1824}\text{N}_{135}\text{O}_{714}\text{P}_{21} = 32523.3$  [ $M+H$ ]<sup>+</sup>; found 32523.7 (After deconvolution) with signals corresponding to losses of monomers (~876) and dendron(s) (~5290).

MALDI-TOF (DHB matrix) : 32550.1, with signals corresponding to losses of monomers (~876) and dendron(s) (~5290).

**NMR diffusion studies** ( $\text{CDCl}_3$ ):  $D = 1.08 \times 10^{-10}$  m<sup>2</sup>/s;  $d_s = 7.5$  nm.

**GPC measurements** (THF):  $M_w = 33560$ ;  $M_n = 33090$ , PDI ( $M_w/M_n$ ) = 1.014

( $\text{CHCl}_3/\text{Et}_3\text{N}$  (1%)):  $M_w = 35320$ ;  $M_n = 34480$ , PDI ( $M_w/M_n$ ) = 1.025.

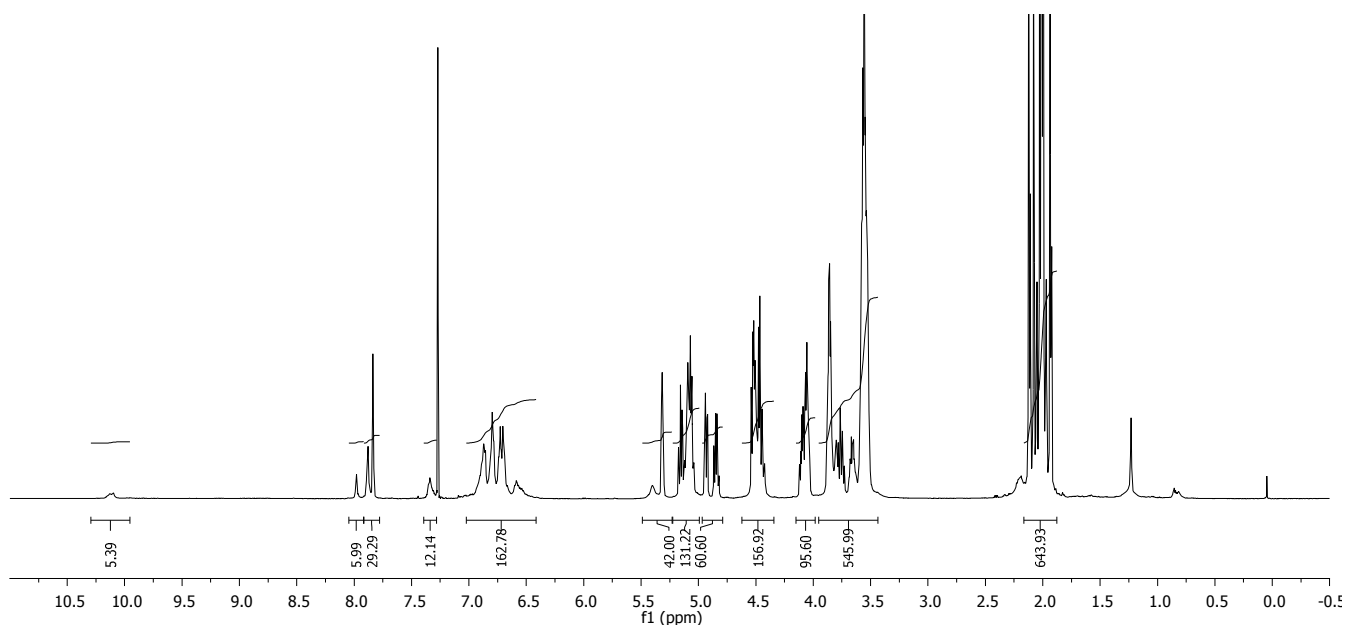

**Figure S106.**  $^1\text{H NMR}$  spectrum of compound **26** ( $\text{CDCl}_3$ , 600MHz)

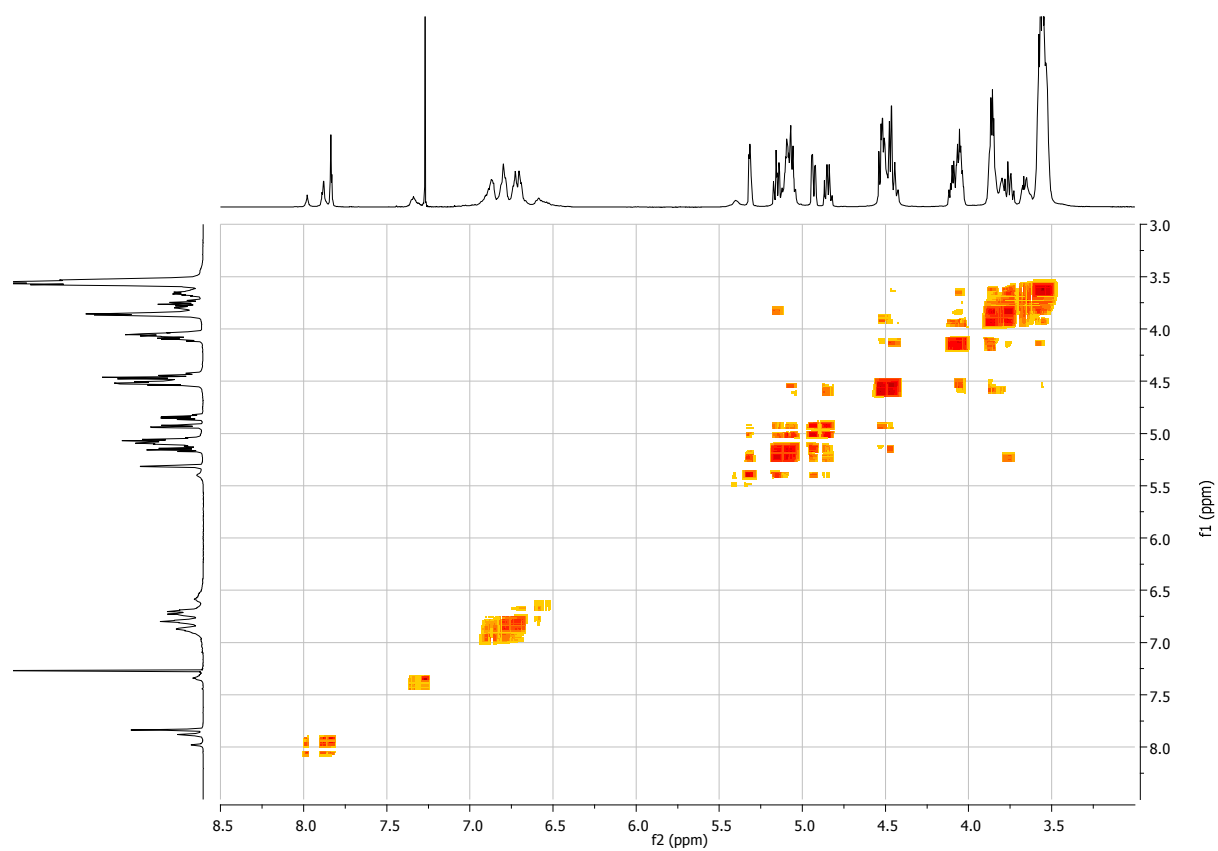

Figure S107. gCOSY spectrum of compound **26**

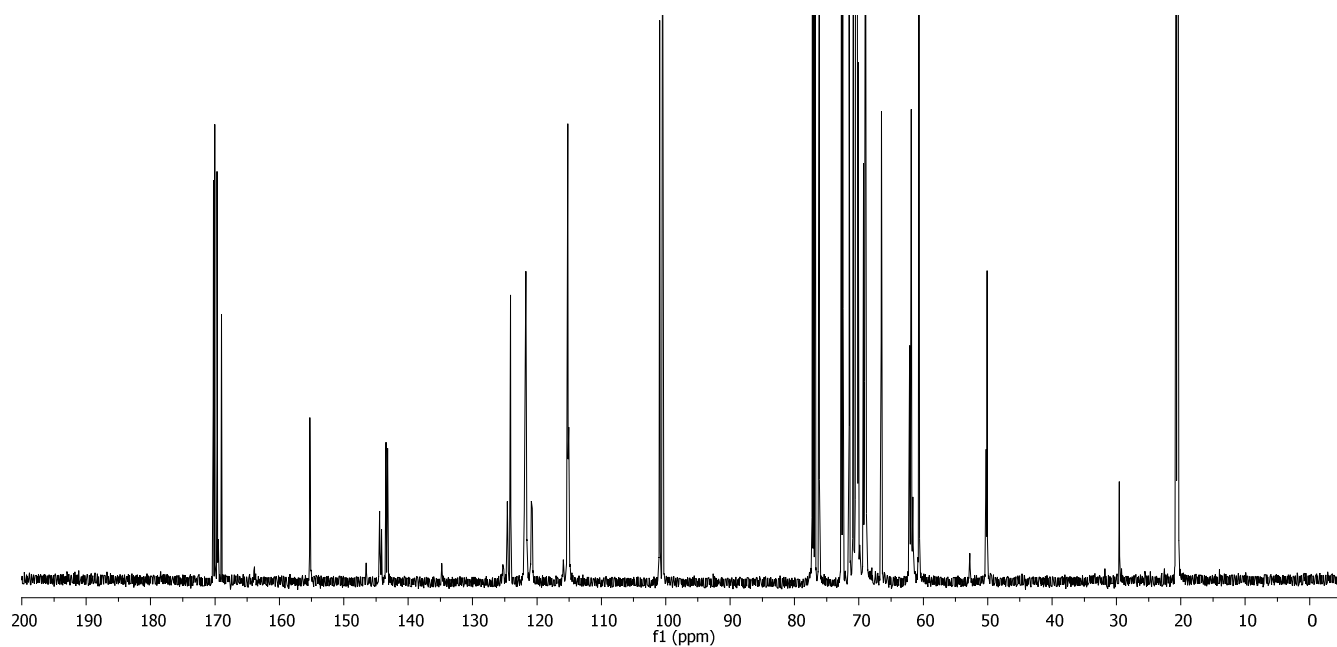

Figure S108.  $^{13}\text{C}$  NMR spectrum of compound **26** ( $\text{CDCl}_3$ , 150MHz)



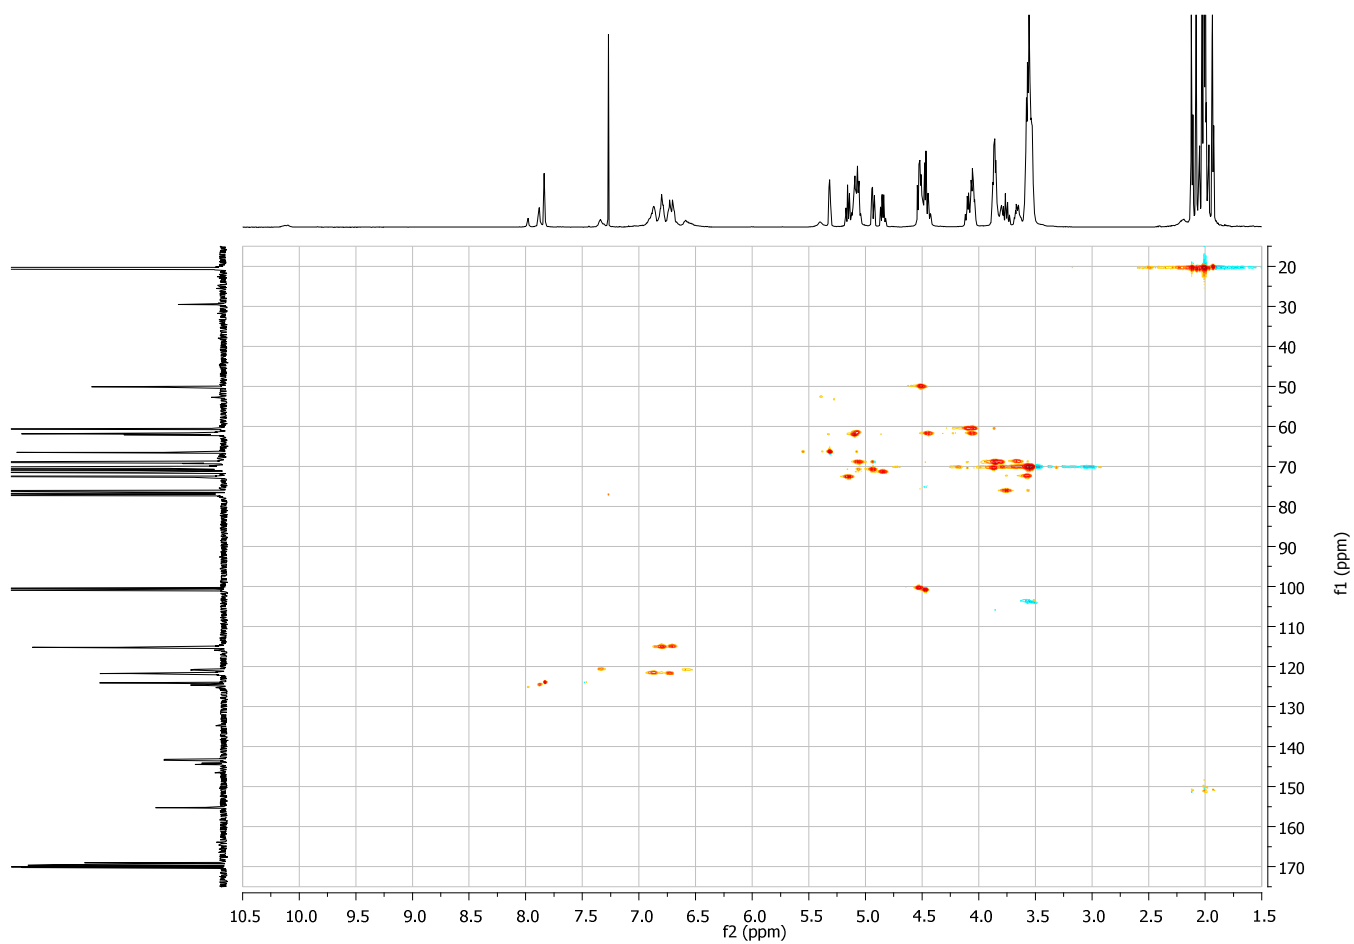

Figure S109. HMBC spectrum of compound 26

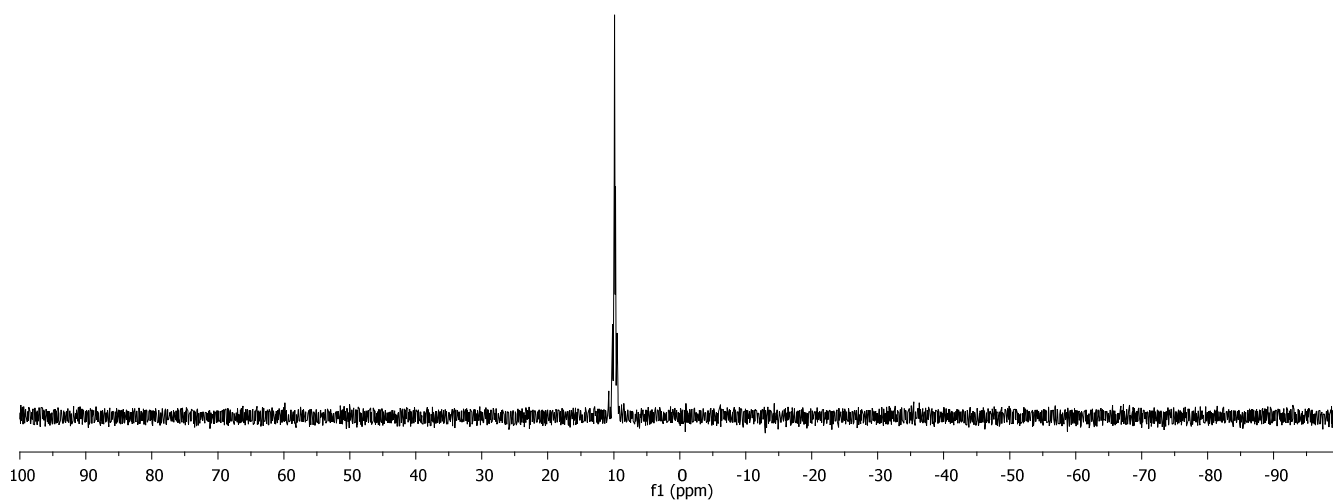

Figure S110.  $^{31}\text{P}$  NMR spectrum of compound 26 ( $\text{CDCl}_3$ , 122MHz)

## User Spectra

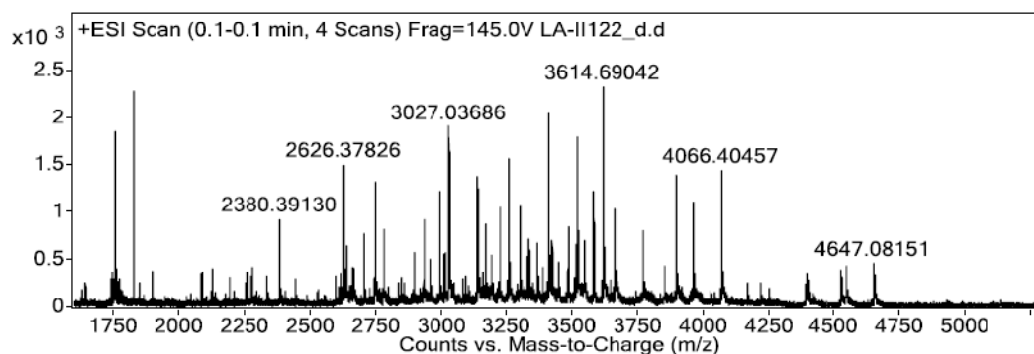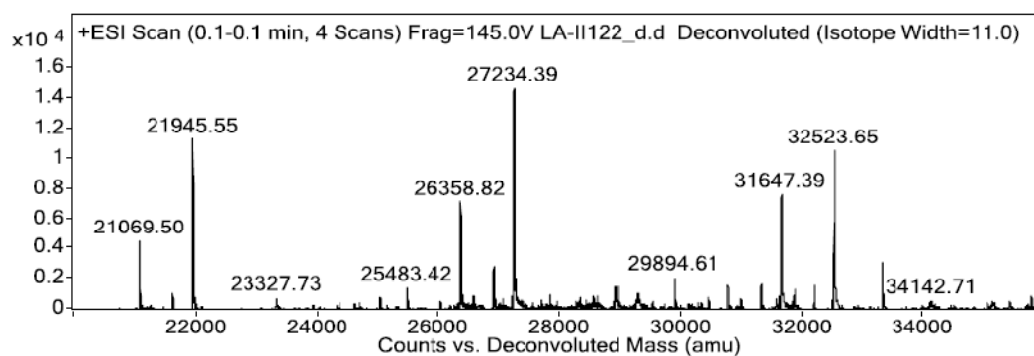

Figure S111. ESI<sup>+</sup>-MS spectrum (deconvolution) of compound 26

D:\Data\2013 Maldi Data Folders\Rene Roy (UQAM)\130502-Rene Roy-Rishi-LAI 122-cal-LP40k\0\_B2\2\1SLin

Comment 1 cal LP 40k  
Comment 2 lp 3000

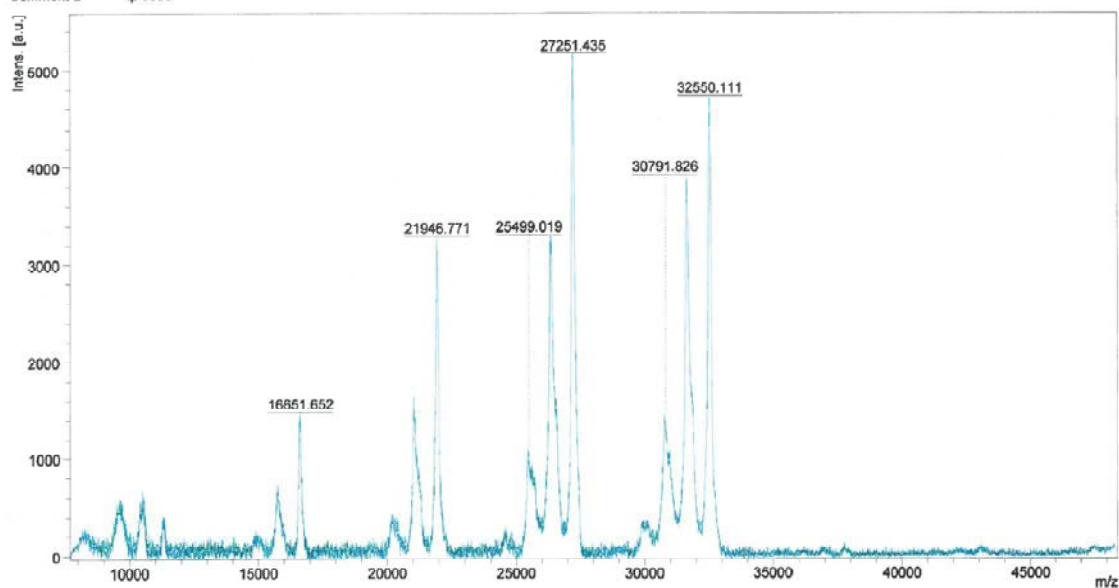

Figure S112. MALDI-TOF (DHB matrix) of compound 26

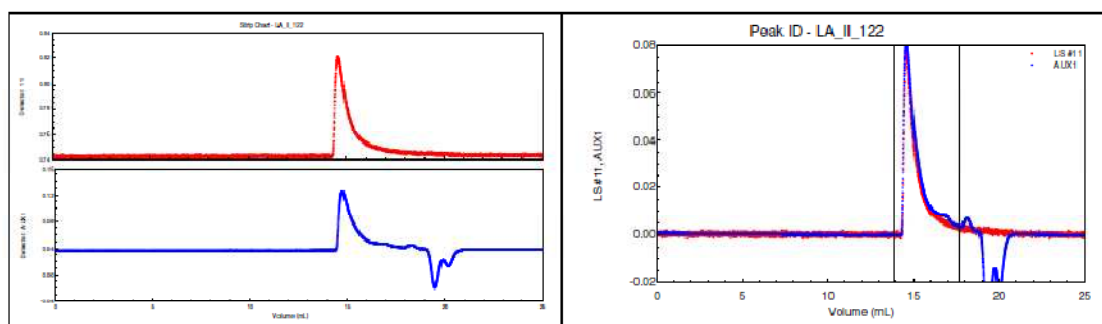

Polydispersity(Mw/Mn) : 1.014±0.126 (12%)  
 Polydispersity(Mz/Mn) : 1.031±0.231 (22%)

**Molar Mass Moments (g/mol)**  
**Mn** : 3.309e+04 (8%)  
**Mw** : 3.356e+04 (8%)  
**Mz** : 3.412e+04 (20%)

Figure S113. GPC trace (in THF) for compound 26

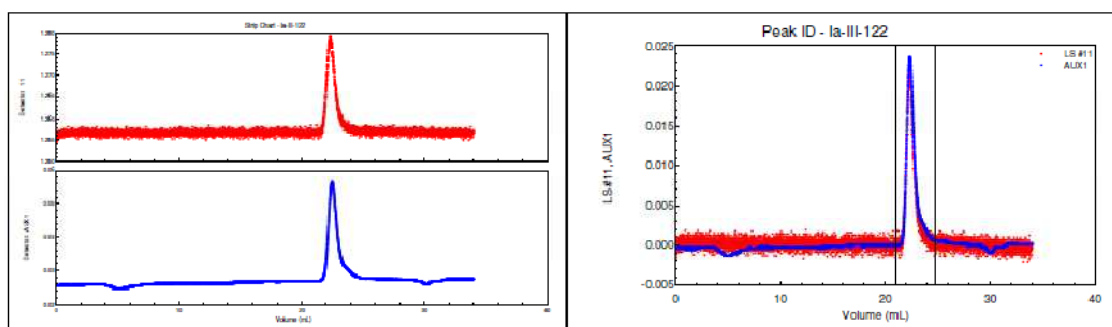

Polydispersity(Mw/Mn) : 1.025±0.176 (17%)  
 Polydispersity(Mz/Mn) : 1.049±0.304 (29%)

**Molar Mass Moments (g/mol)**  
**Mn** : 3.448e+04 (12%)  
**Mw** : 3.532e+04 (11%)  
**Mz** : 3.615e+04 (26%)

Figure S114. GPC trace (in CHCl<sub>3</sub>/Et<sub>3</sub>N (1%)) for compound 26

## Hydroxylated pentadecaivalent glycodendrimer **27**

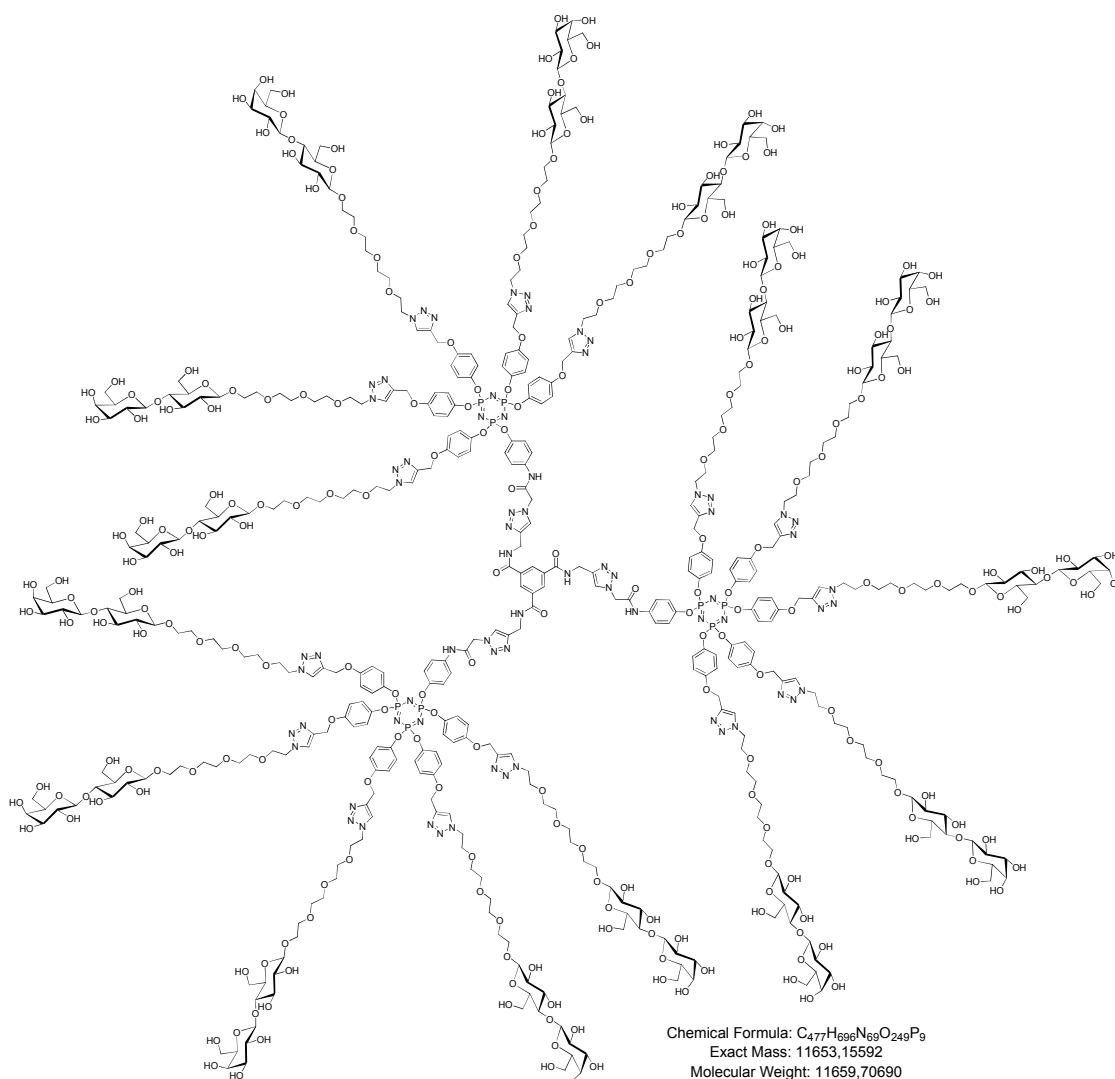

Acetylated compound **25** (50.0 mg, 3.11  $\mu\text{mol}$ ) was dissolved in a dry mixture of MeOH/DCM (5 mL, 4:1) and a solution of sodium methoxide (1M in MeOH, 5  $\mu\text{L}$  every 20 minutes until precipitation) was added. An additional 100  $\mu\text{L}$  was then injected and the heterogeneous reaction mixture was stirred at room temperature for 18 hours. The solvent was then removed with a Pasteur pipette and another dry mixture of MeOH/DCM (5 mL, 4:1) is added to the residual oil. A vigorous agitation is maintained for an additional 15 min. period. After removal of the solvents with a Pasteur pipette, 2 mL of dry MeOH were added to the viscous residue under agitation. After 15 min., the MeOH was removed and the residue was dissolved in 3 mL of H<sub>2</sub>O, and the pH was adjusted to 7 with addition of ion-exchange resin (Amberlite IR 120 H<sup>+</sup>). After filtration, the solvent was removed under *vacuum* with rotary evaporator, lyophilized to yield the fully deprotected derivative **27** as an off-white solid (29.0 mg, 2.49  $\mu\text{mol}$ , **80%**).

<sup>1</sup>H NMR (600 MHz, D<sub>2</sub>O, δ ppm): 8.27 (s, 3H, CH<sub>core</sub>), 7.86-7.75 (m, 18H, H<sub>triazole</sub>), 7.10 (br s, 6H, CH<sub>b</sub>), 6.57-6.47 (m, 66H, CH<sub>b</sub>, CH<sub>c</sub>, CH<sub>c</sub>), 5.17 (br s, 6H, N<sub>triazole</sub>CH<sub>2</sub>CO), 4.96-4.82 (br s, 36H, C<sub>q-triazole</sub>CH<sub>2</sub>O + CONHCH<sub>2</sub>C<sub>q</sub>), 4.40-4.30 (m, 60H, N<sub>triazole</sub>CH<sub>2</sub>CH<sub>2</sub>, H<sub>1glc</sub>, H<sub>1gal</sub>), 3.82 (m, 45H, OCH<sub>2</sub>CH<sub>2</sub>N, LacOCHHCH<sub>2</sub>), 3.75-3.27 (m, 330H, H<sub>3glc</sub>, H<sub>2gal</sub>, H<sub>3gal</sub>, H<sub>6bglc</sub>, H<sub>4gal</sub>, H<sub>6agal</sub>, H<sub>6bgal</sub>, H<sub>6aglc</sub>, H<sub>5gal</sub>, H<sub>5glc</sub>, H<sub>4glc</sub>, LacOCHHCH<sub>2</sub>, OCH<sub>2</sub>), 3.33 (t<sub>app</sub>, 15H, H<sub>2glc</sub>).

<sup>13</sup>C NMR (150 MHz, D<sub>2</sub>O, δ ppm): 167.1 (C=O), 165.2 (C=O), 156.6 (C<sub>a</sub>), 146.8 (C<sub>d</sub>'), 145.5 (C<sub>d</sub>), 144.5 (C<sub>d</sub>), 143.6 (C<sub>triazole</sub>=CH), 143.7 (C<sub>triazole</sub>=CH), 133.8 (C<sub>q-core</sub>), 129.9 (CH<sub>core</sub>), 125.9 (C<sub>triazole</sub>=CH), 125.4 (C<sub>a</sub>'), 122.4 (C<sub>triazole</sub>=CH), 121.7 (C<sub>c</sub> + C<sub>b</sub> + C<sub>c</sub>'), 116.2 (C<sub>b</sub>), 103.7 (C<sub>1gal</sub>), 102.8 (C<sub>1glc</sub>), 79.1 (C<sub>4glc</sub>), 76.0 (C<sub>3glc</sub>), 75.4 (C<sub>5glc</sub>), 75.0 (C<sub>5gal</sub>), 73.5 (C<sub>2glc</sub>), 73.2 (C<sub>3gal</sub>), 71.6 (C<sub>2gal</sub>), 70.3, 70.2, 70.0, 69.4, (OCH<sub>2</sub>), 69.4 (C<sub>4gal</sub>), 69.2 (OCH<sub>2</sub>), 62.0 (OCH<sub>2</sub>C=C), 61.7 (C<sub>6glc</sub>), 60.7 (C<sub>6gal</sub>), 53.2 (N<sub>triazole</sub>CH<sub>2</sub>CO), 50.7 (NCH<sub>2</sub>), 36.8 (C<sub>core</sub>CONHCH<sub>2</sub>C<sub>q</sub>).

<sup>31</sup>P NMR (122 MHz, D<sub>2</sub>O, δ ppm): 10.2 (s, 9P).

*m/z* (ESI<sup>+</sup>-HRMS) for C<sub>477</sub>H<sub>696</sub>N<sub>69</sub>O<sub>249</sub>P<sub>9</sub> = 11660.7 [M+H]<sup>+</sup>, found 11660.6 (After deconvolution).

NMR diffusion studies (D<sub>2</sub>O): *D* = 0.70×10<sup>-10</sup> m<sup>2</sup>/s; *d<sub>s</sub>* = 5.7 nm.

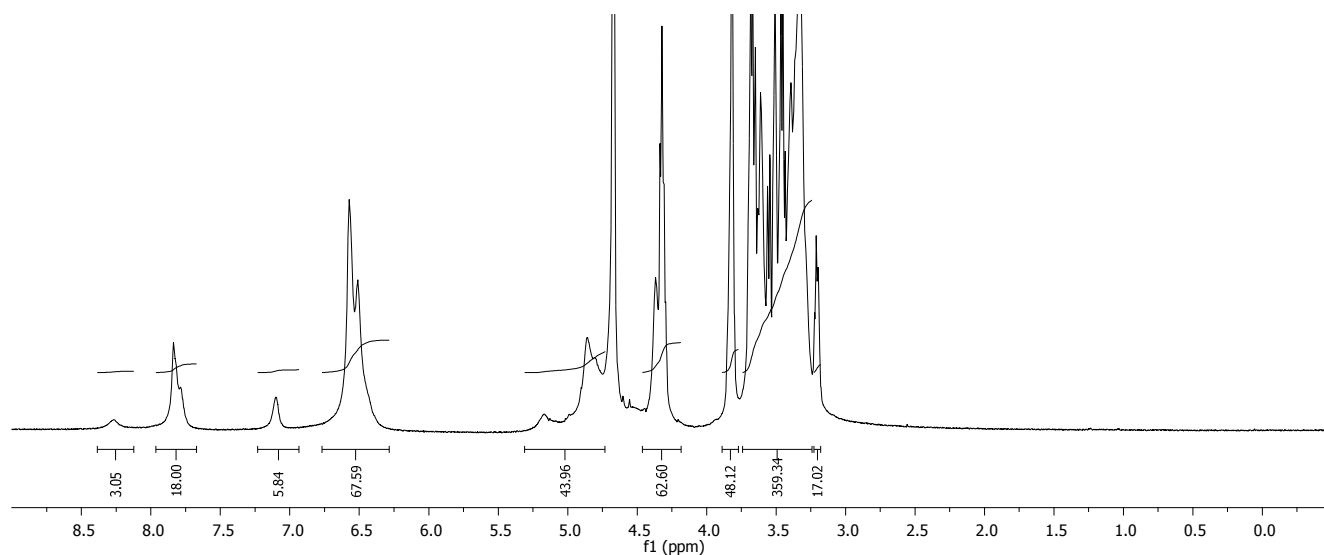

Figure S115. <sup>1</sup>H NMR spectrum of compound 27 (D<sub>2</sub>O, 600MHz)

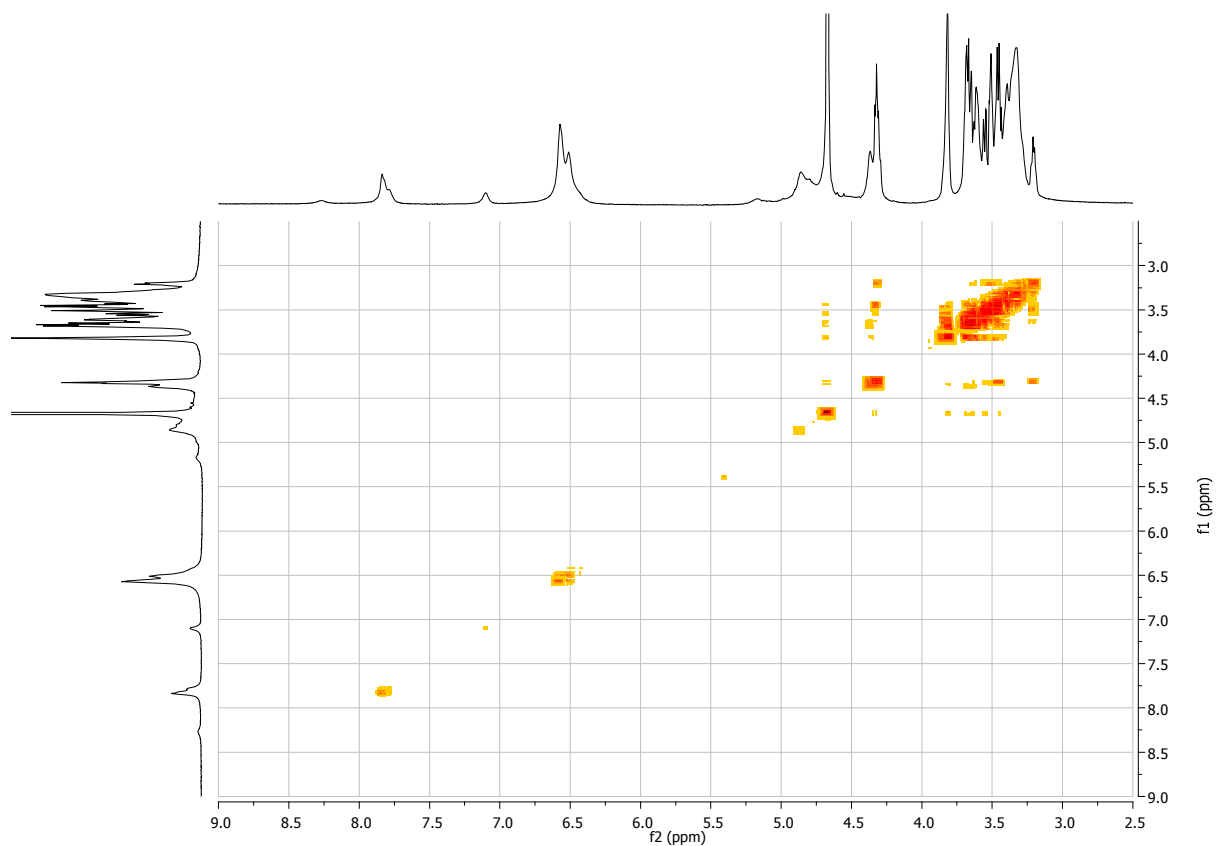

**Figure S116.** gCOSY spectrum of compound **27**

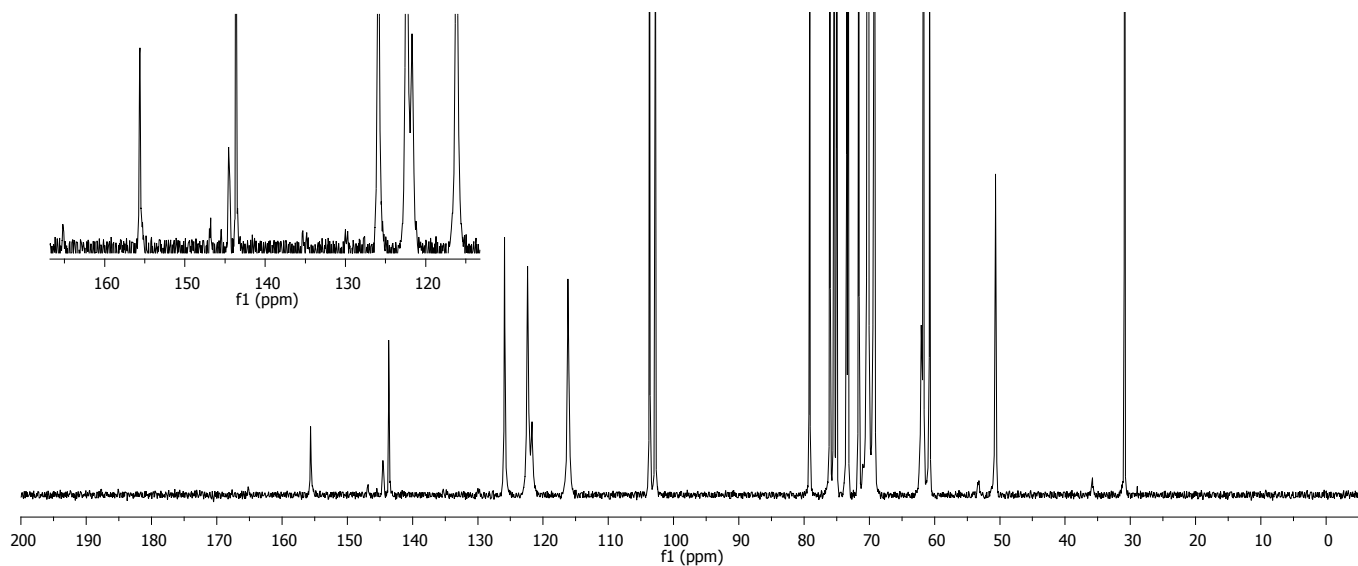

**Figure S117.**  $^{13}\text{C}$  NMR spectrum of compound **27** ( $\text{D}_2\text{O}$ , 150MHz, acetone as reference) (*insert*: Zoom of the aromatic section)

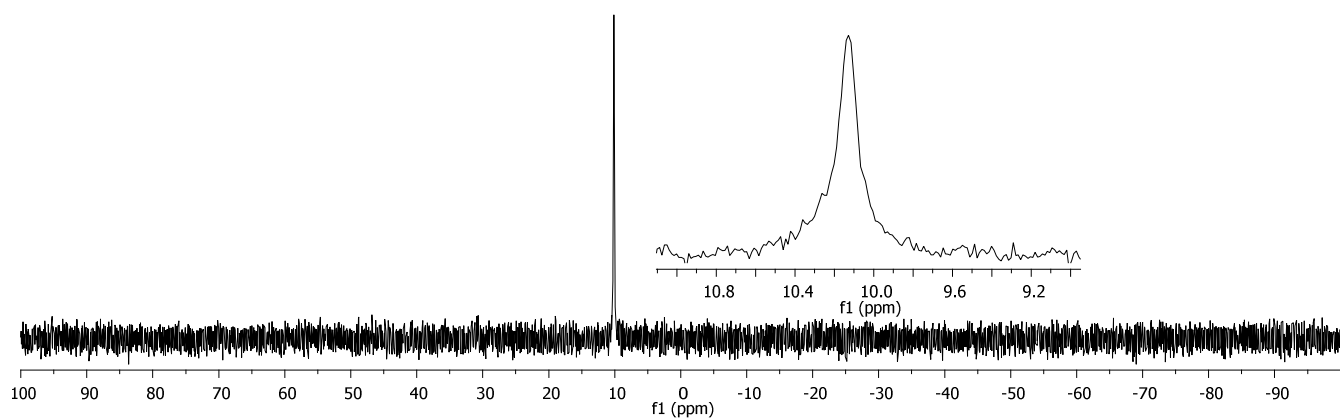

Figure S118.  $^{31}\text{P}$  NMR spectrum of compound **27** ( $\text{D}_2\text{O}$ , 122MHz)

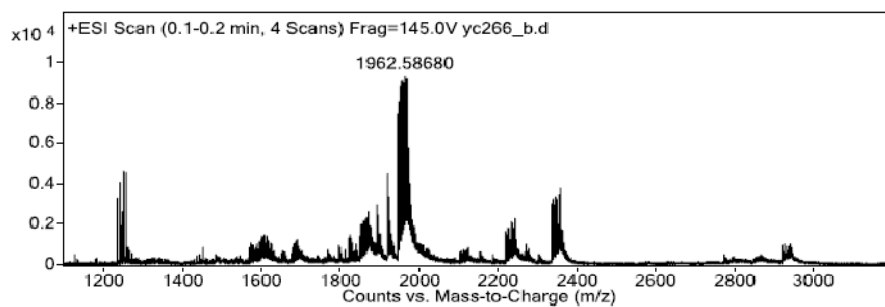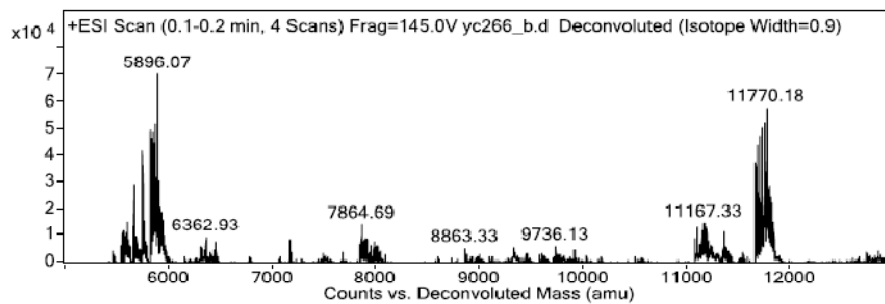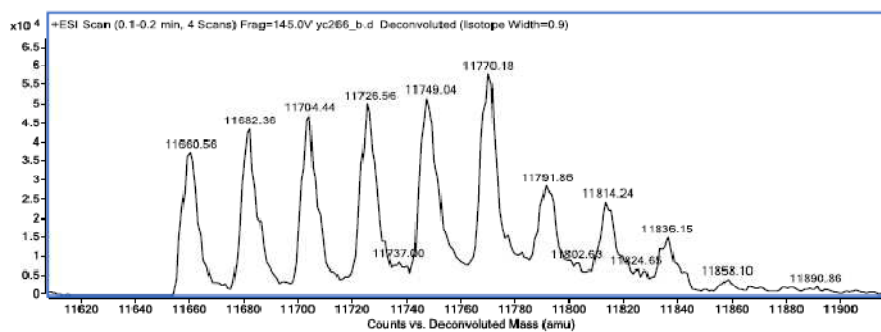

Figure S119. ESI<sup>+</sup>-MS spectrum of compound **27**

## Hydroxylated tricontavalent glycodendrimer **28**

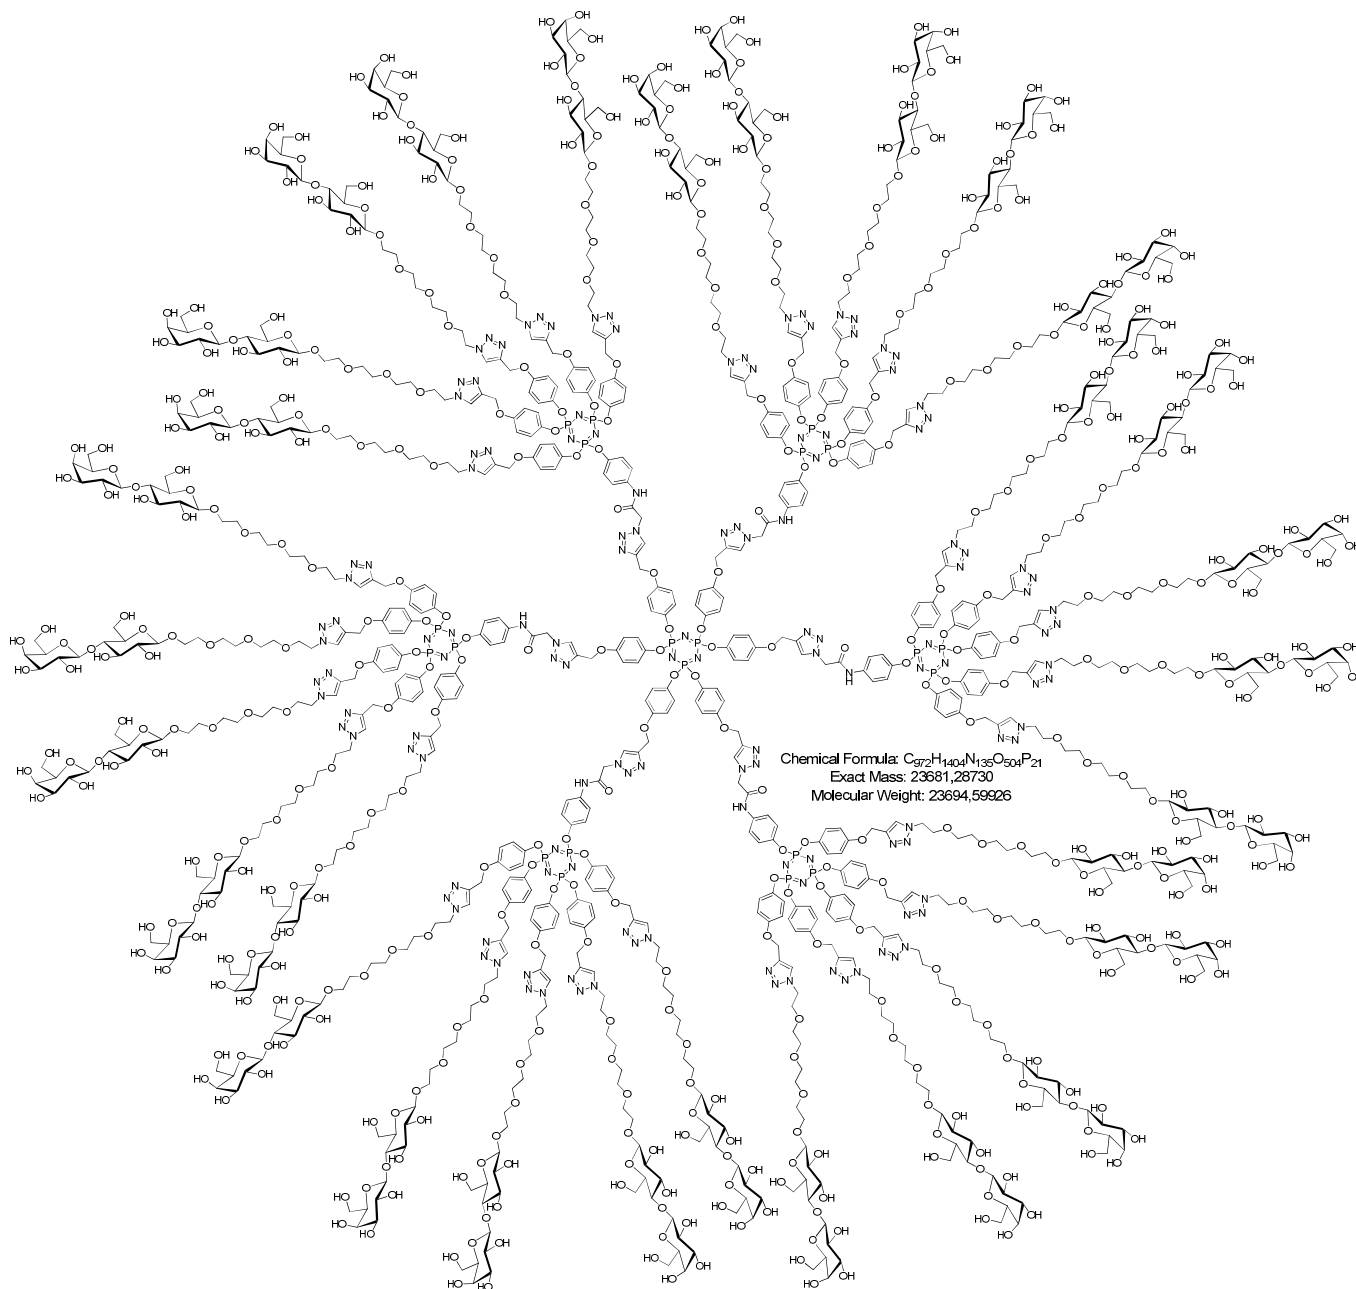

Acetylated compound **26** (50.0 mg, 1.54  $\mu$ mol) was dissolved in a dry mixture of MeOH/DCM (5 mL, 4:1) and a solution of sodium methoxide (1M in MeOH, 5  $\mu$ L every 20 minutes until precipitation) was added. An additional 100  $\mu$ L was then injected and the heterogeneous reaction mixture was stirred at room temperature for 18 hours. The solvent was then removed with a Pasteur pipette and another dry mixture of MeOH/DCM (5 mL, 4:1) is added to the residual oil. A vigorous agitation is maintained for an additional 15 min. period. After removal of the solvents with a Pasteur pipette, 2 mL of dry MeOH were added to the viscous residue under agitation. After 15 min., the MeOH was removed and the residue was dissolved in 3 mL of H<sub>2</sub>O, and the pH was adjusted to 7 with addition of ion-exchange



resin (Amberlite IR 120 H<sup>+</sup>). After filtration, the solvent was removed under *vacuum* with rotary evaporator, lyophilized to yield the fully deprotected derivative **28** as an off-white solid (29.0 mg, 1.22  $\mu$ mol, **93%**).

**<sup>1</sup>H NMR** (600 MHz, D<sub>2</sub>O,  $\delta$  ppm): 7.99 (m, 36H,  $H_{\text{triazole}}$ ), 7.28 (br s, 12H,  $CH_b$ ), 6.99 (m, 156H,  $CH_b$ ,  $CH_c$ ,  $CH_c$ ,  $CH_{\text{a-core}}$ ), 5.10-4.90 (br s, 72H,  $C_{\text{q-triazole}}CH_2O$ ), 4.56-4.41 (m, 132H,  $N_{\text{triazole}}CH_2CH_2$ ,  $N_{\text{triazole}}CH_2CO$ ,  $H_{1\text{glc}}$ ,  $H_{1\text{gal}}$ ), 3.93 (m, 90H,  $OCH_2CH_2N$ ,  $LacOCHHCH_2$ ), 3.81-3.34 (m, 690H,  $H_{3\text{glc}}$ ,  $H_{2\text{gal}}$ ,  $H_{3\text{gal}}$ ,  $H_{6\text{bglc}}$ ,  $H_{4\text{gal}}$ ,  $H_{6\text{agal}}$ ,  $H_{6\text{bgal}}$ ,  $H_{6\text{aglc}}$ ,  $H_{5\text{gal}}$ ,  $H_{5\text{glc}}$ ,  $H_{4\text{glc}}$ ,  $LacOCHHCH_2$ ,  $OCH_2$ ,  $H_{2\text{glc}}$ ).

**<sup>13</sup>C NMR** (150 MHz, D<sub>2</sub>O,  $\delta$  ppm): 167.1 (C=O) *not visible*, 165.2 (C=O) *not visible*, 156.6 ( $C_a$ ), 154.3 ( $C_{\text{a-core}}$ ), 146.8 ( $C_d$ ), 145.5 ( $C_d$ ), 144.6 ( $C_d$ ), 143.7 ( $C_{\text{triazole=CH}}$ ), 143.7 ( $C_{\text{triazole=CH}}$ ), 136.5 ( $C_a$ ), 125.9 ( $C_{\text{triazole=CH}}$ ), 122.4 ( $C_{\text{triazole=CH}}$ ), 121.0, 120.7 ( $C_c + C_b + C_c$ ), 116.2 ( $C_b$ ,  $C_{\text{b-core}}$ ), 103.7 ( $C_{1\text{gal}}$ ), 102.8 ( $C_{1\text{glc}}$ ), 79.1 ( $C_{4\text{glc}}$ ), 76.0 ( $C_{3\text{glc}}$ ), 75.4 ( $C_{5\text{glc}}$ ), 75.0 ( $C_{5\text{gal}}$ ), 73.5 ( $C_{2\text{glc}}$ ), 73.2 ( $C_{3\text{gal}}$ ), 71.6 ( $C_{2\text{gal}}$ ), 70.3, 70.2, ( $OCH_2$ ), 69.4 ( $C_{4\text{gal}}$ ), 69.2 ( $OCH_2$ ), 62.1 ( $OCH_2C=C$ ), 61.7 ( $C_{6\text{glc}}$ ), 60.8 ( $C_{6\text{gal}}$ ), 53.2 ( $N_{\text{triazole}}CH_2CO$ ), 50.7 ( $NCH_2$ ).

**<sup>31</sup>P NMR** (122 MHz, D<sub>2</sub>O,  $\delta$  ppm): 10.2 (s, 21P).

*m/z* (MALDI-TOF) for  $C_{972}H_{1404}N_{135}O_{504}P_{21}$  = 23694.6, found 23755.9 (*with signals corresponding to losses of dendron(s)*).

**NMR diffusion studies** (D<sub>2</sub>O):  $D = 0.56 \times 10^{-10}$  m<sup>2</sup>/s;  $d_s = 7.2$  nm.

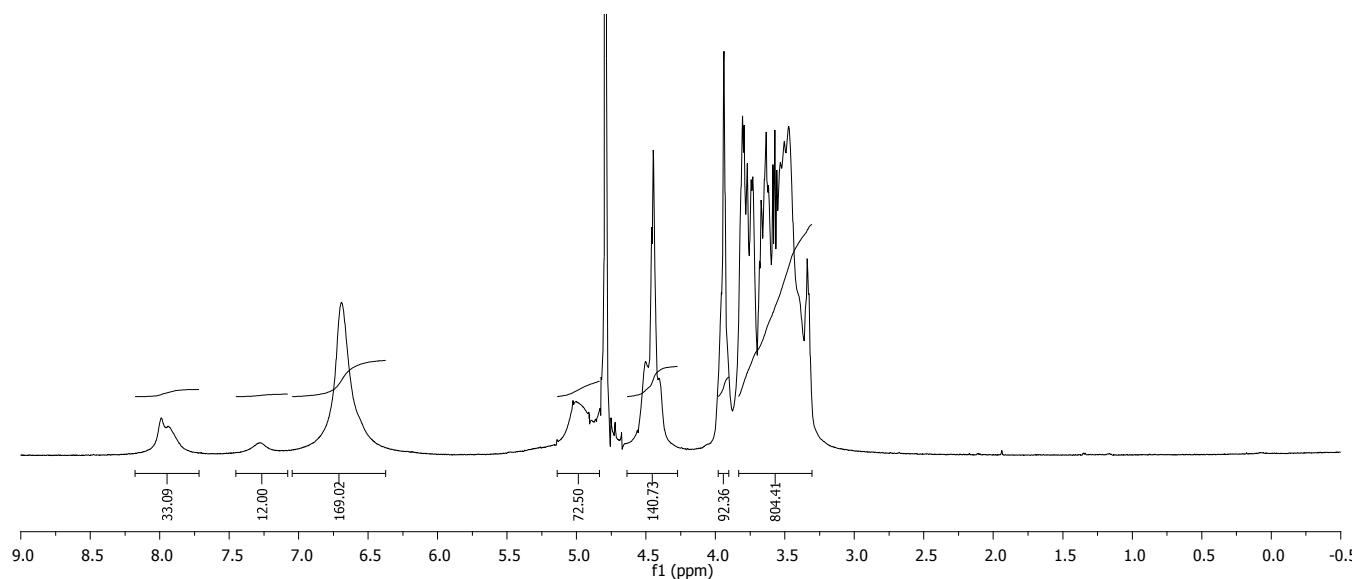

**Figure S120.** <sup>1</sup>H NMR spectrum of compound **28** (D<sub>2</sub>O, 600MHz)

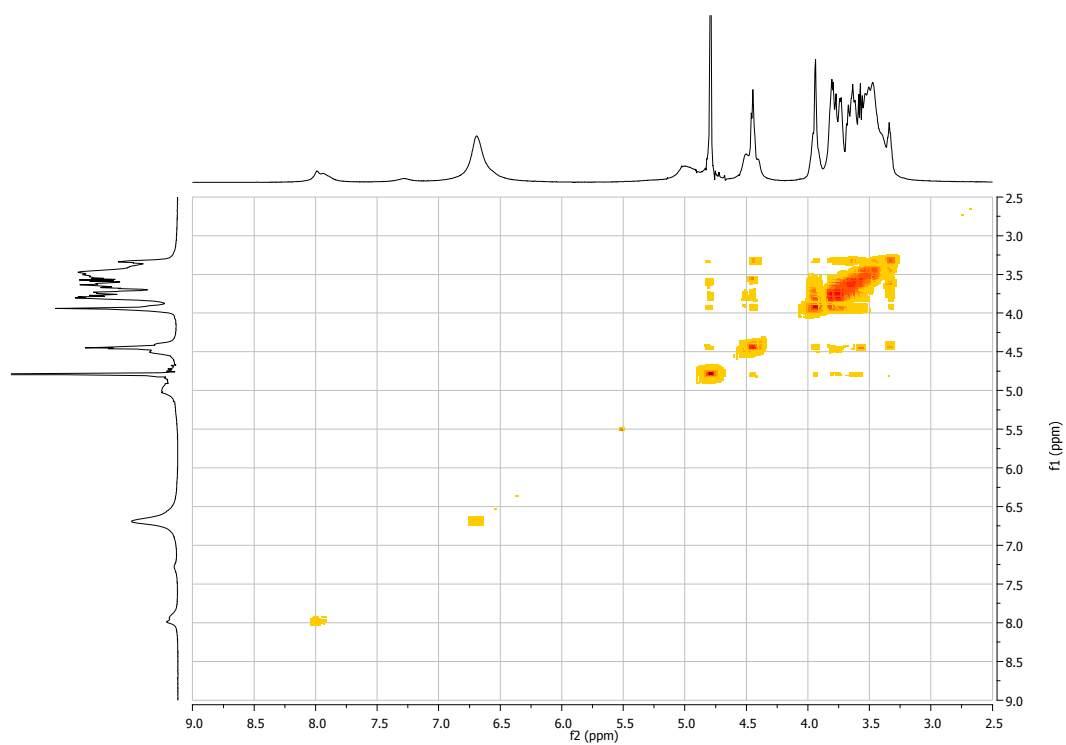

**Figure S121.** gCOSY spectrum of compound **28**

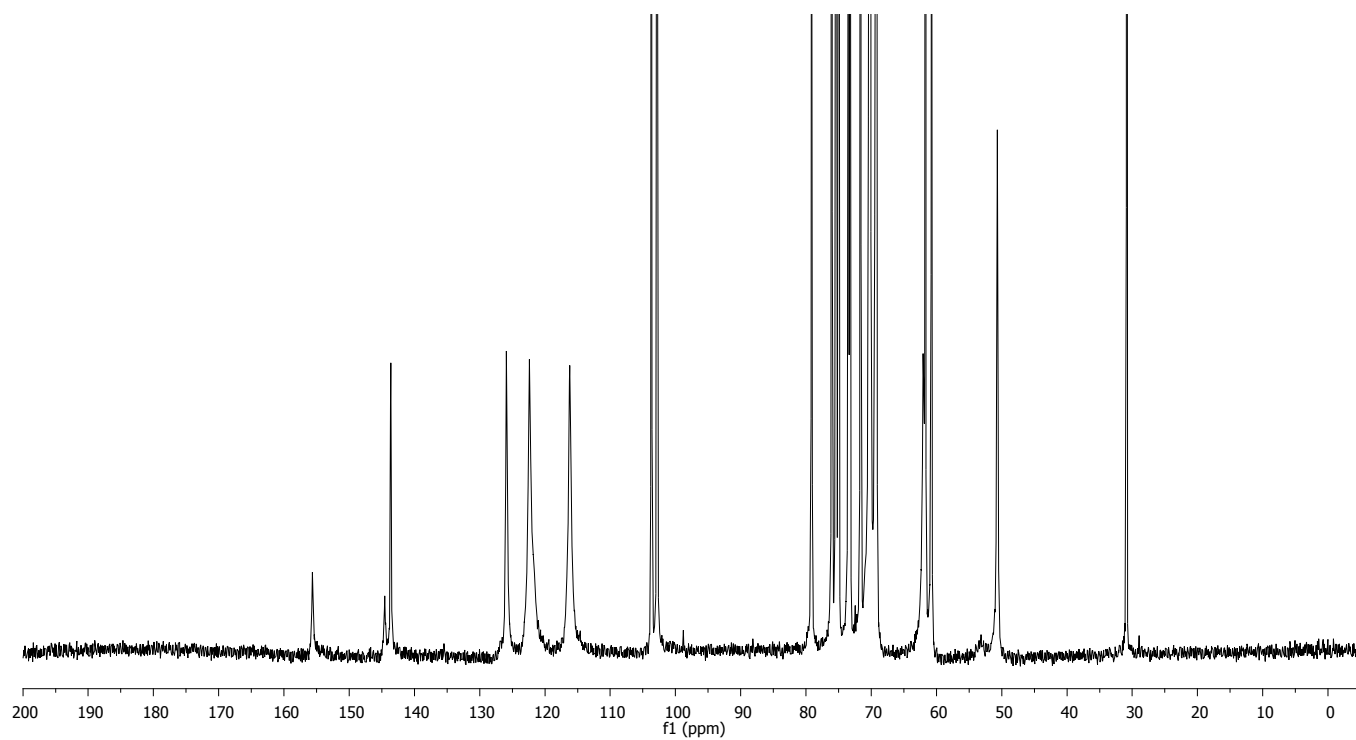

**Figure S122.**  $^{13}\text{C}$  NMR spectrum of compound **28** ( $\text{D}_2\text{O}$ , 150MHz, acetone as reference)

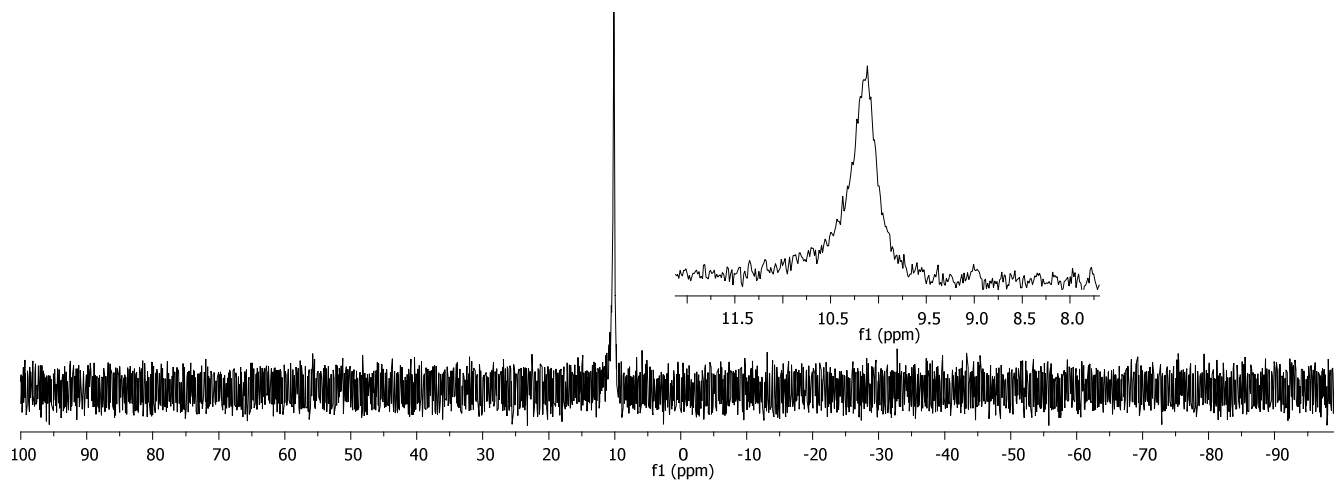

Figure S123.  $^{31}\text{P}$  NMR spectrum of compound **28** ( $\text{D}_2\text{O}$ , 122MHz)

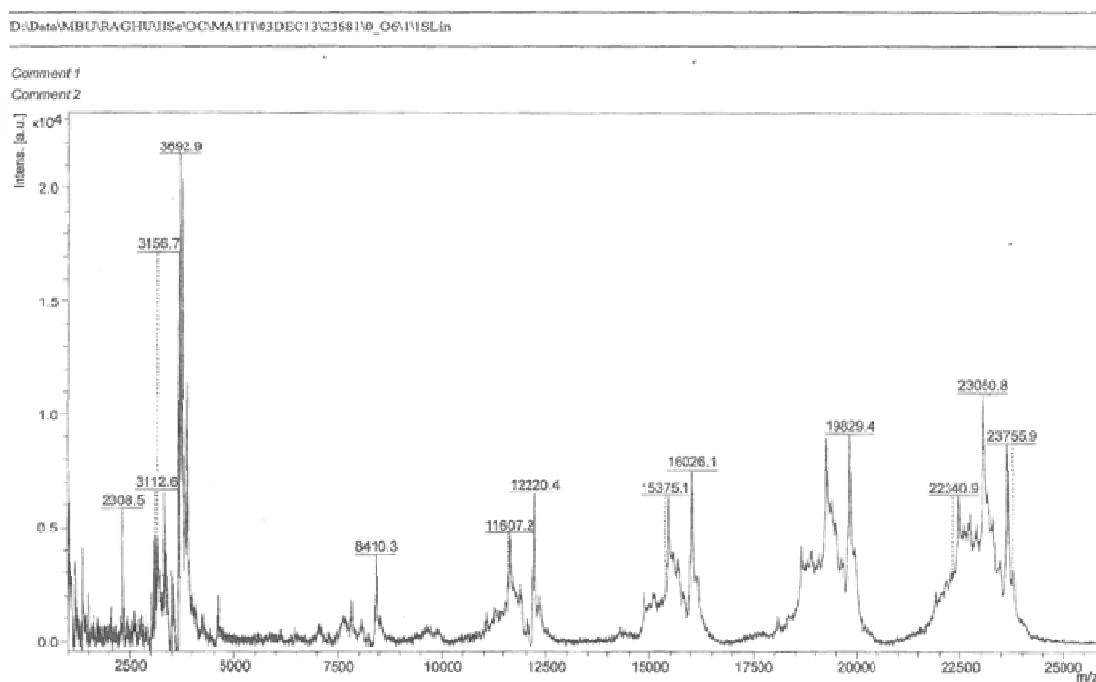

Figure S124. MALDI-TOF (DHB matrix) spectrum for compound **26** ( $\text{D}_2\text{O}$ , 600MHz)

## AB<sub>15</sub> glycodendron with a focal CI 29

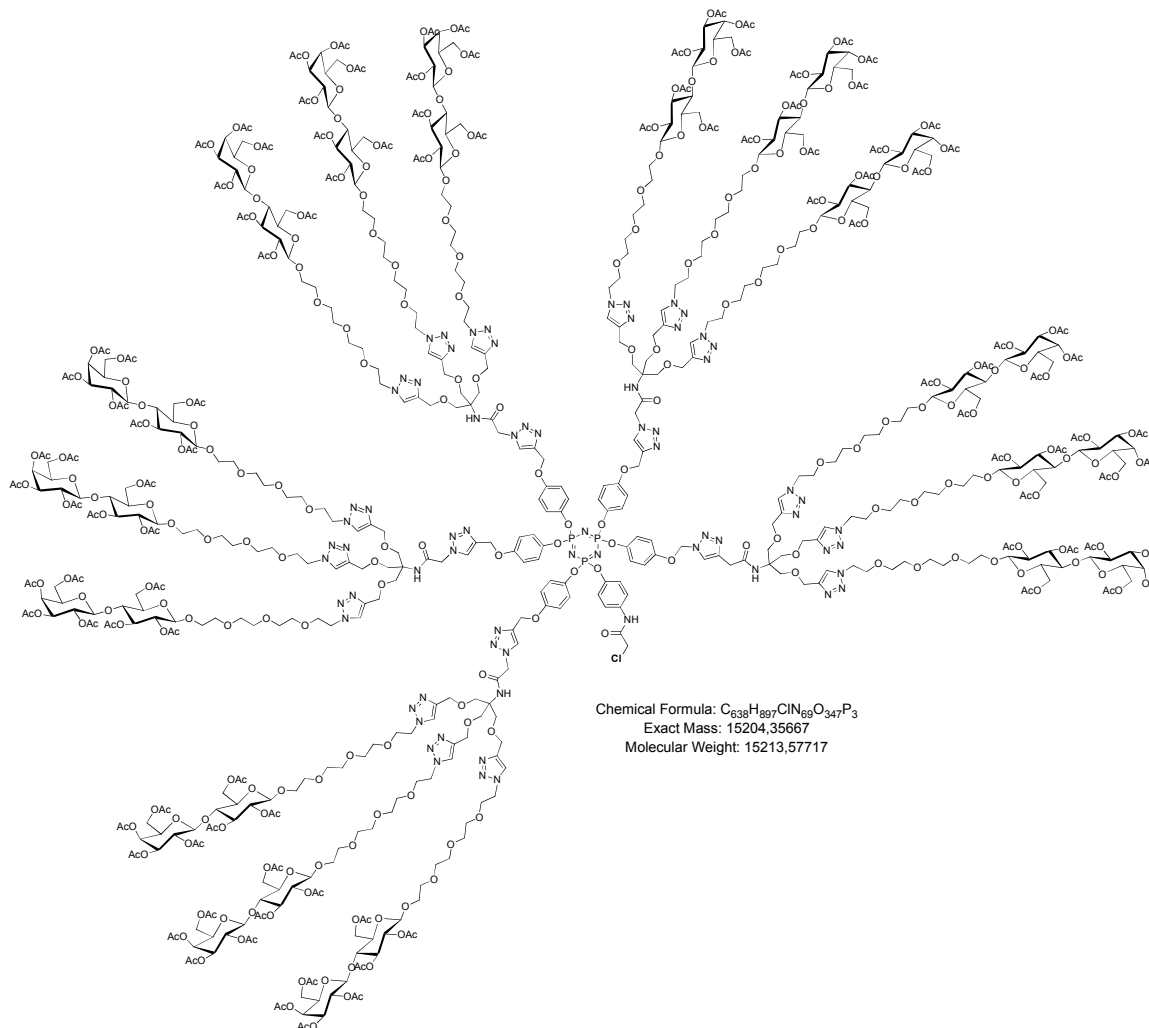

To a stirring solution of **6** (9.8 mg, 9.3  $\mu$ mol, 1.0 eq.) and dendron **14** (174.2 mg, 60.7  $\mu$ mol, 6.5 eq.) in dry THF (2.5 mL) were added 2.5 mL of H<sub>2</sub>O and a mixture of CuSO<sub>4</sub>·5H<sub>2</sub>O (13.2 mg, 52.8  $\mu$ mol, 5.7 eq.) and sodium ascorbate (10.5 mg, 52.8  $\mu$ mol, 5.7 eq.). After stirring for 3 hours at 50°C in a 20 mL vial, the reaction was left stirring at room temperature for 18 hours (additional CuSO<sub>4</sub>·5H<sub>2</sub>O (7.0 mg) and sodium ascorbate (4.0 mg) were incorporated in the mixture after 5 hours of reaction). EtOAc (50 mL) was added and the solution was washed successively with a saturated aqueous solution of NH<sub>4</sub>Cl (3×25 mL), water (2×20 mL) and brine (10 mL). The organic phase was then dried over MgSO<sub>4</sub> and concentrated under reduced pressure. Column chromatography on silica (DCM/MeOH 100:0 to 93:7) afforded the desired compound **29** (103.0 mg, 6.77  $\mu$ mol, **73%**) as a colorless oil.

R<sub>f</sub> = 0.18, DCM/MeOH 94:6

<sup>1</sup>H NMR (600 MHz, CDCl<sub>3</sub>,  $\delta$  ppm): 10.1 (5H, NH) *not visible*, 9.48 (br s, 1H, NH), 7.93-7.90 (m, 5H, H<sub>triazole int</sub>), 7.72-7.68 (s, 15H, H<sub>triazole ext</sub>), 7.35 (m, 2H, CH<sub>b</sub>), 6.97-6.57 (m, 22H, CH<sub>b</sub>, CH<sub>c</sub>, CH<sub>c</sub>), 5.30 (d<sub>app</sub>, 15H, H<sub>4gal</sub>), 5.15 (t<sub>app</sub>, 15H, H<sub>3glc</sub>), 5.08-5.05 (m, 25H, C<sub>q</sub>CH<sub>2</sub>O, H<sub>2gal</sub>), 4.93 (dd, <sup>3</sup>J<sub>2,3</sub> = 3.4 Hz, <sup>3</sup>J<sub>3,4</sub> = 7.0 Hz, 15H, H<sub>3gal</sub>), 4.84 (t<sub>app</sub>, 15H, H<sub>2glc</sub>),

4.53-4.44 (m, 105H,  $C_qCH_2O$ ,  $OCH_2CH_2N$ ,  $H_{1glc}$ ,  $H_{6aglc}$ ,  $H_{1gal}$ ), 4.17 (s, 2H,  $CH_2Cl$ ), 4.11-4.03 (m, 45H,  $H_{6bglc}$ ,  $H_{6agal}$ ,  $H_{6bbgal}$ ), 3.88-3.55 (m, 295H,  $NHCOCH_2N_{triazole}$ ,  $OCH_2CH_2N$ ,  $H_{5gal}$ ,  $H_{5glc}$ ,  $H_{4glc}$ ,  $OCH_2$ ,  $HNC_qCH_2O$ ), 2.11-1.92 (m, 315H,  $COCH_3$ ).

$^{13}C$  NMR (150 MHz,  $CDCl_3$ ,  $\delta$  ppm): 170.3, 170.2, 170.0, 169.9, 169.7, 169.5, 169.0 (7xs,  $COCH_3$ ), 167.1 (CONH), 165.1 (CONH), 155.3 ( $C_a$ ), 147.3 ( $C_d'$ ), 144.6 ( $C_d$ ), 144.3 ( $C_d$ ), 144.3, 144.2 ( $C_{triazole=CH}$ ), 143.5 ( $C_{triazole=CH}$ ), 134.6 ( $C_a'$ ), 125.4 ( $C_{triazole=CH}$ ), 125.1 ( $C_{triazole=CH}$ ), 123.7 ( $C_{triazole=CH}$ ), 121.8 ( $C_c$ ), 120.9 ( $C_b'$ ), 120.8 ( $C_c'$ ), 115.9, 115.1 ( $C_b$ ), 100.9 ( $C_{1gal}$ ), 100.5 ( $C_{1glc}$ ), 76.1 ( $C_{4glc}$ ), 72.7 ( $C_{3glc}$ ), 72.5 ( $C_{5glc}$ ), 71.5 ( $C_{2glc}$ ), 70.9 ( $C_{3gal}$ ), 70.5 ( $C_{5gal}$ ), 70.5, 70.4, 70.3, 70.1, 69.2 ( $OCH_2$ ), 68.9 ( $C_{2gal}$ ), 68.9 ( $OCH_2$ ), 68.5 ( $C_qCH_2O$ ), 66.5 ( $C_{4gal}$ ), 64.5 ( $OCH_2C=C$ ), 62.0 ( $C_q$ ), 61.9 ( $C_{6glc} + C_qCH_2O$ ), 60.7 ( $C_{6gal}$ ), 60.3 ( $OCH_2$ ), 52.5 ( $N_{triazole}CH_2CONH$ ), 49.9 ( $NCH_2$ ), 43.5 ( $COCH_2Cl$ ), 20.7, 20.7, 20.6, 20.5, 20.5, 20.4 (7xs,  $COCH_3$ ).

$^{31}P$  NMR (122 MHz,  $CDCl_3$ ,  $\delta$  ppm): 9.8 (m, 3P).

$m/z$  (ESI $^+$  MS) for  $C_{638}H_{897}ClN_{69}O_{347}P_3 = 15214.6 [M+H]^+$ , found 15214.3 (After deconvolution).

NMR diffusion studies ( $CDCl_3$ ):  $D = 1.57 \times 10^{-10} m^2/s$ ;  $d_s = 5.1$  nm.

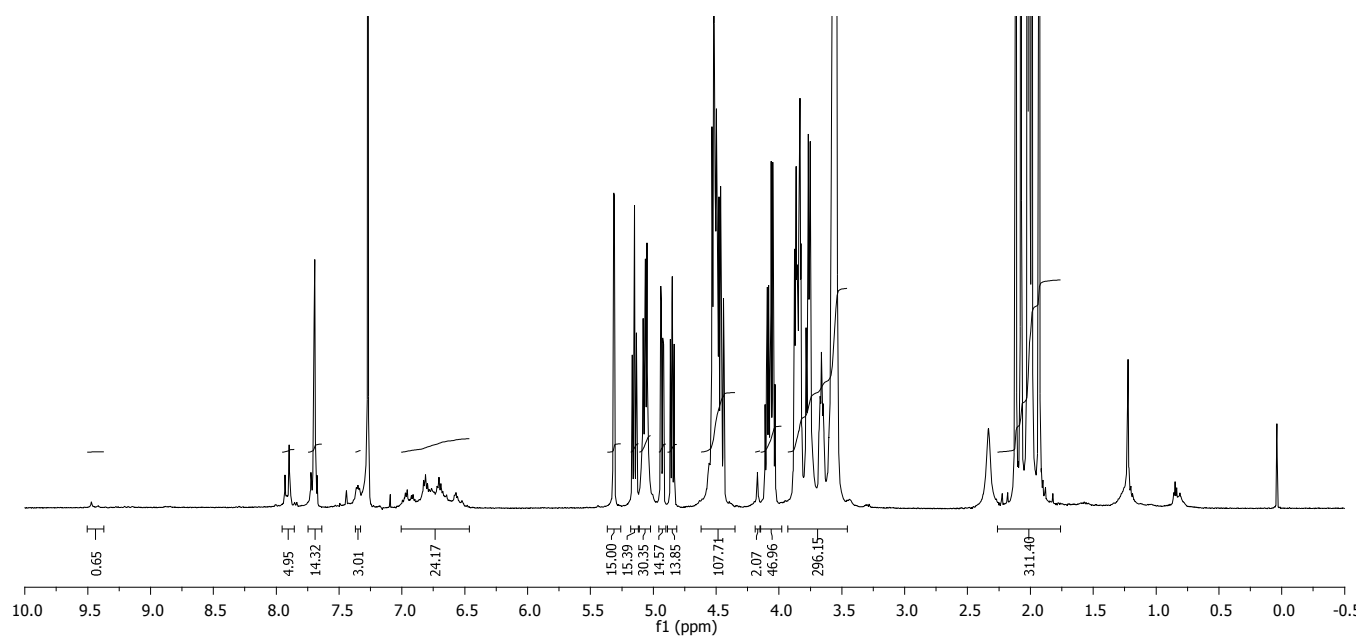

Figure S125.  $^1H$  NMR spectrum of compound **29** ( $CDCl_3$ , 600MHz)

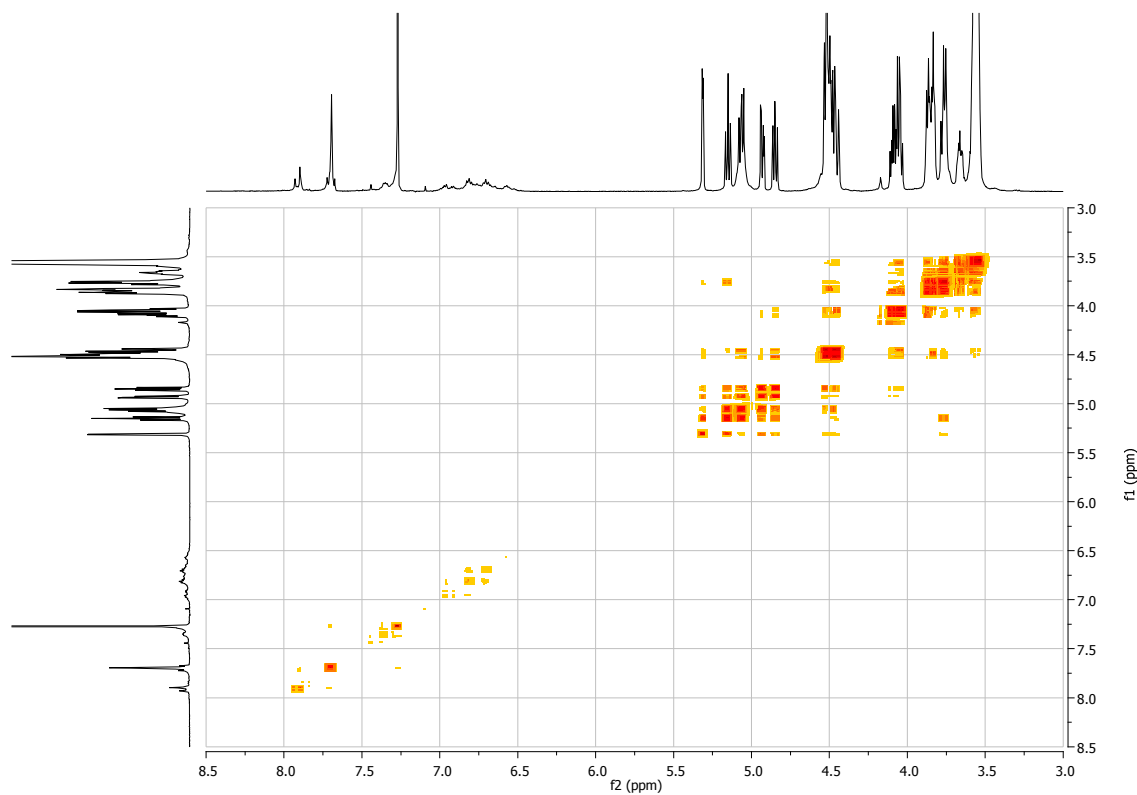

Figure S126. gCOSY spectrum of compound **29**

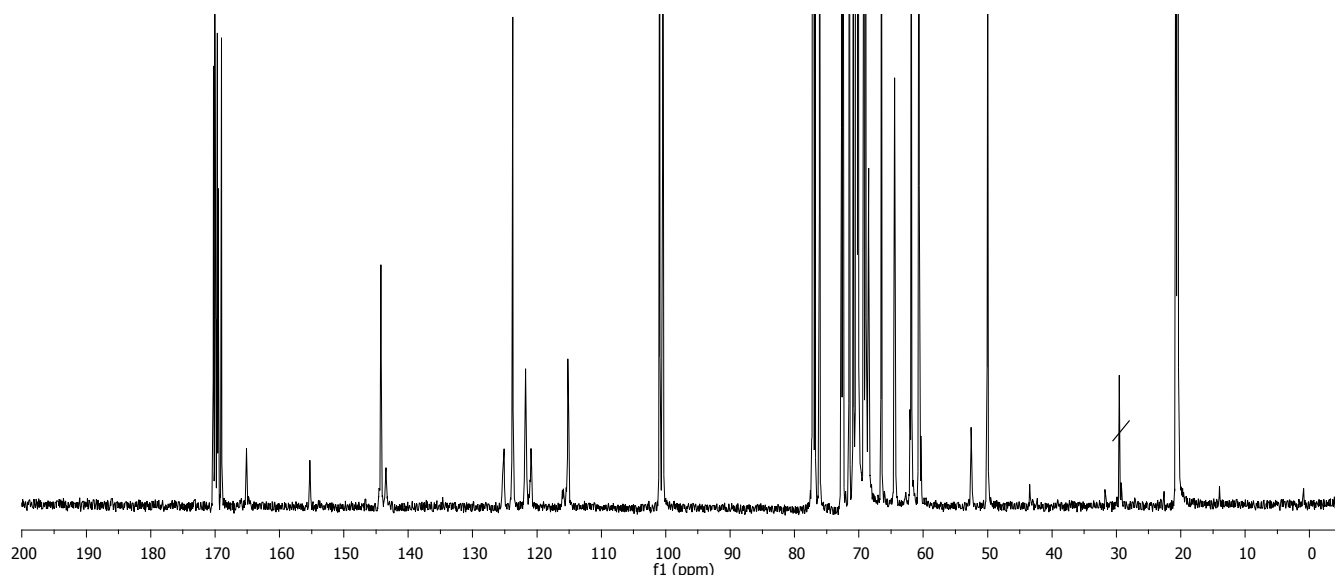

Figure S127.  $^{13}\text{C}$  NMR spectrum of compound **29** ( $\text{CDCl}_3$ , 150MHz)

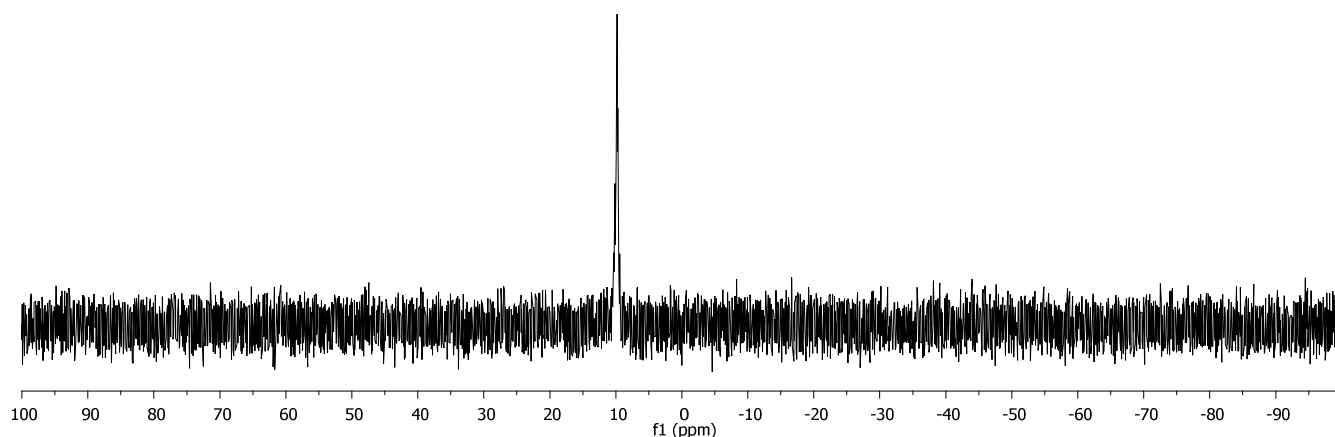

Figure S128.  $^{31}\text{P}$  NMR spectrum of compound **29** ( $\text{CDCl}_3$ , 122MHz)

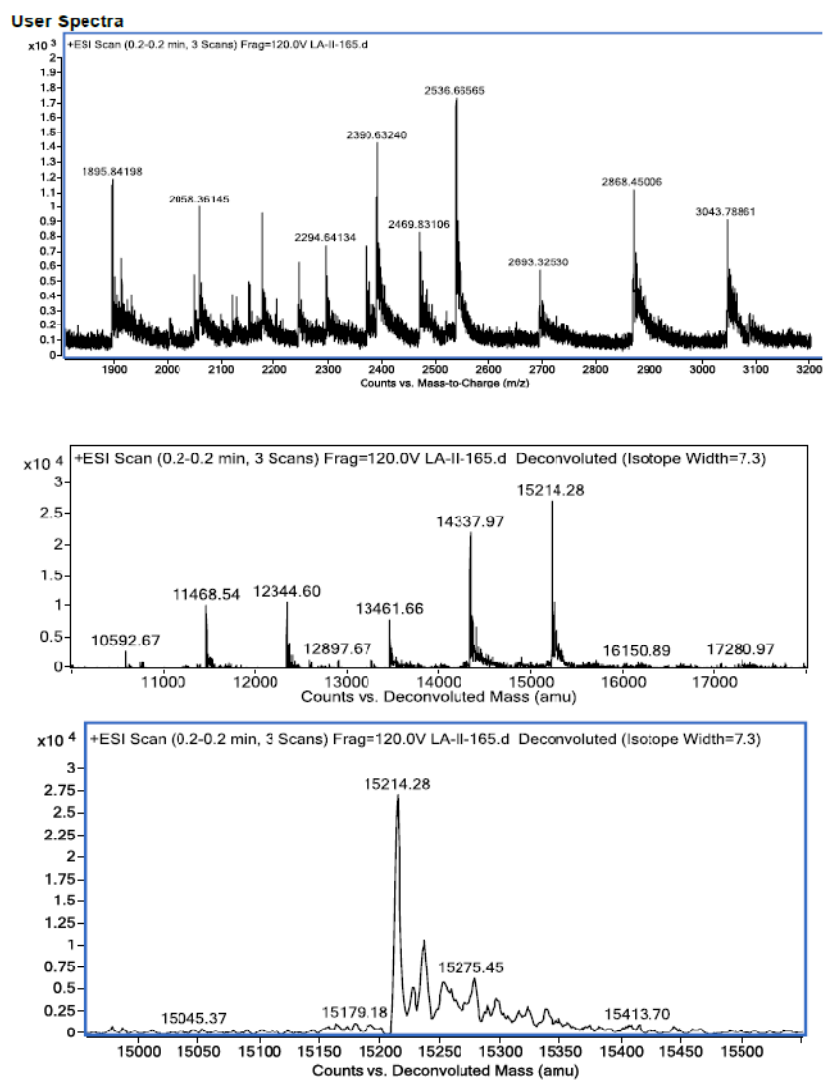

Figure S129. ESI<sup>+</sup>-MS spectrum (deconvolution) of compound **29**

## AB<sub>15</sub> glycodendron with a focal N<sub>3</sub> 30

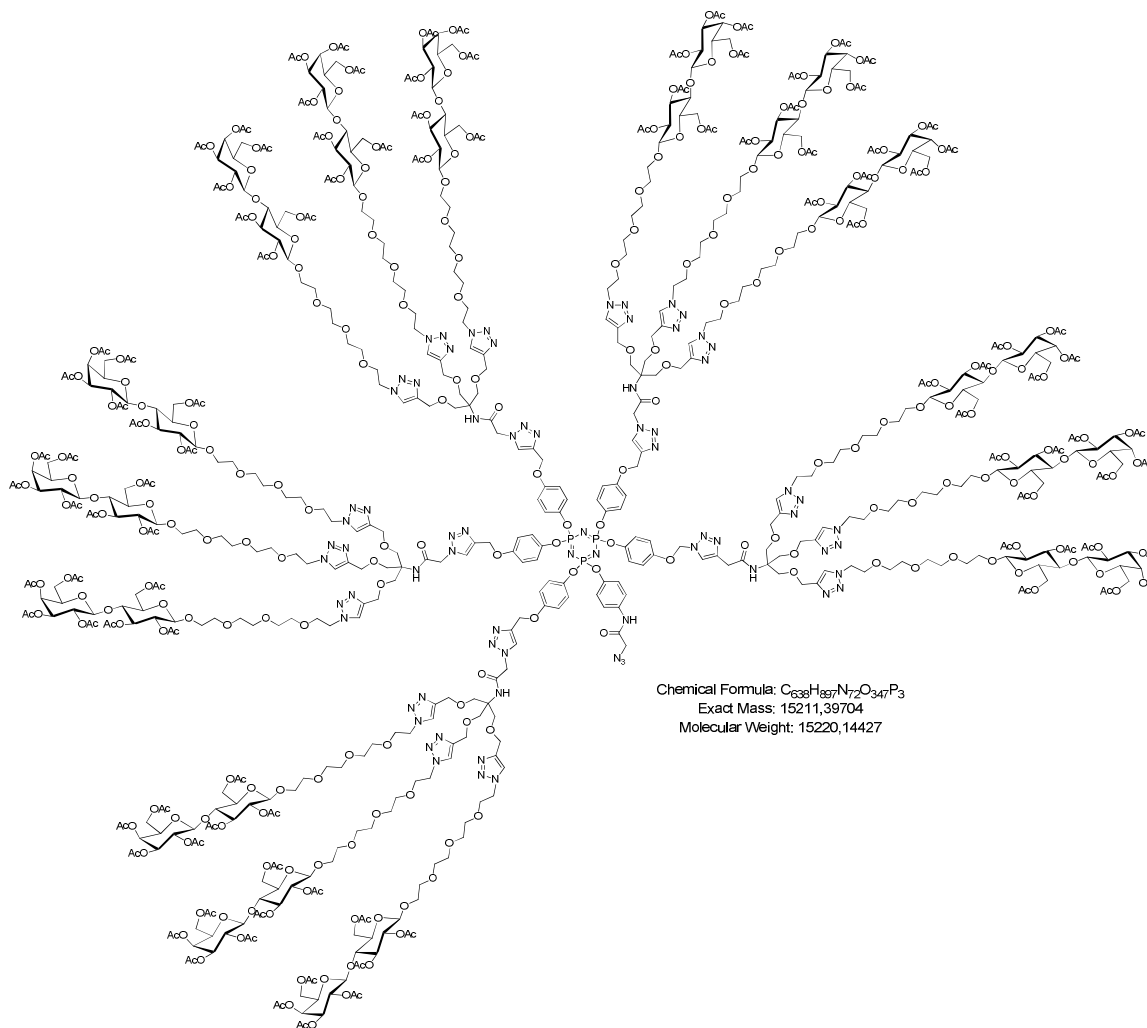

To a stirring solution of **29** (129 mg, 8.48  $\mu\text{mol}$ , 1.0 eq) in dry DMF (2 mL) under a nitrogen atmosphere were added sodium azide (5.0 mg, 76  $\mu\text{mol}$ , 9.0 eq.) and sodium iodide (1.0 mg, 1.7  $\mu\text{mol}$ , 0.2 eq.). After stirring at 70°C for 5 hours under a nitrogen atmosphere, the mixture was stirred at room temperature for additional 15 hours. The solvent was removed under reduced pressure and EtOAc was added. Then the organic was washed successively with water (4×20 mL) and brine (3×10 mL). The organic phase was then dried over Na<sub>2</sub>SO<sub>4</sub> and concentrated under reduced pressure. Column chromatography on silica (DCM/MeOH 100:0 to 90:10) afforded the desired compound **30** (98.0 mg, 6.44  $\mu\text{mol}$ , **76%**) as a colorless oil.

R<sub>f</sub> = 0.18, DCM/MeOH 94:6

<sup>1</sup>H NMR (600 MHz, CDCl<sub>3</sub>,  $\delta$  ppm): 10.1 (5H, NH) *not visible*, 9.48 (br s, 1H, NH), 7.93-7.90 (m, 5H, H<sub>triazole int</sub>), 7.73-7.67 (s, 15H, H<sub>triazole ext</sub>), 7.33 (m, 2H, CH<sub>b</sub>'), 6.99-6.57 (m, 22H, CH<sub>b</sub>, CH<sub>c</sub>, CH<sub>c</sub>'), 5.30 (d<sub>app</sub>, 15H, H<sub>4gal</sub>), 5.16 (t<sub>app</sub>, 15H, H<sub>3glc</sub>), 5.09-5.04 (m, 25H, C<sub>q</sub>CH<sub>2</sub>O, H<sub>2gal</sub>), 4.92 (dd, <sup>3</sup>J<sub>2,3</sub> = 3.4 Hz, <sup>3</sup>J<sub>3,4</sub> = 7.0 Hz, 15H, H<sub>3gal</sub>), 4.84 (t<sub>app</sub>, 15H, H<sub>2glc</sub>),



4.53-4.44 (m, 105H,  $C_qCH_2O$ ,  $OCH_2CH_2N$ ,  $H_{1glc}$ ,  $H_{6aglc}$ ,  $H_{1gal}$ ), 4.11-4.03 (m, 47H,  $H_{6bglc}$ ,  $H_{6agal}$ ,  $H_{6bgal}$ ,  $CH_2N_3$ ), 3.84-3.52 (m, 295H,  $NHCOCH_2N_{triazole}$ ,  $OCH_2CH_2N$ ,  $H_{5gal}$ ,  $H_{5glc}$ ,  $H_{4glc}$ ,  $OCH_2$ ,  $HNC_qCH_2O$ ), 2.11-1.92 (m, 315H,  $COCH_3$ ).

$^{13}C$  NMR (150 MHz,  $CDCl_3$ ,  $\delta$  ppm): 170.2, 170.2, 170.0, 169.9, 169.6, 169.5, 168.9 (7xs,  $COCH_3$ ), 166.0 (CONH), 165.0 (CONH), 155.2 ( $C_a$ ), 147.3 ( $C_d'$ ), 144.6 ( $C_d$ ), 144.5 ( $C_d$ ), 144.3, 144.2 ( $C_{triazole=CH}$ ), 143.4 ( $C_{triazole=CH}$ ), 134.6 ( $C_a$ ), 125.3 ( $C_{triazole=CH}$ ), 125.1 ( $C_{triazole=CH}$ ), 123.7 ( $C_{triazole=CH}$ ), 121.7 ( $C_c$ ), 120.8 ( $C_b'$ ), 120.8 ( $C_c'$ ), 115.8, 115.1 ( $C_b$ ), 100.9 ( $C_{1gal}$ ), 100.4 ( $C_{1glc}$ ), 76.1 ( $C_{4glc}$ ), 72.6 ( $C_{3glc}$ ), 72.4 ( $C_{5glc}$ ), 71.4 ( $C_{2glc}$ ), 70.8 ( $C_{3gal}$ ), 70.4 ( $C_{5gal}$ ), 70.4, 70.3, 70.2, 69.2 ( $OCH_2$ ), 68.9 ( $C_{2gal}$ ), 68.9 ( $OCH_2$ ), 68.4 ( $C_qCH_2O$ ), 66.4 ( $C_{4gal}$ ), 64.4 ( $OCH_2C=C$ ), 62.0 ( $C_q$ ), 61.9 ( $C_{6glc} + C_qCH_2O$ ), 60.7 ( $C_{6gal}$ ), 60.3 ( $OCH_2$ ), 52.5 ( $N_{triazole}CH_2CONH$ ), 52.1 ( $COCH_2N_3$ ), 49.9 ( $NCH_2$ ), 20.7, 20.7, 20.6, 20.5, 20.5, 20.4 (7xs,  $COCH_3$ ).

$^{31}P$  NMR (122 MHz,  $CDCl_3$ ,  $\delta$  ppm): 9.8 (m, 3P).

$m/z$  (ESI<sup>+</sup> MS) for  $C_{638}H_{897}ClN_{69}O_{347}P_3 = 15221.1 [M+H]^+$ , found 15220.6 (After deconvolution).

GPC measurements (THF):  $M_w = 16580$  ;  $M_n = 15400$  , PDI ( $M_w/M_n$ ) = 1.077.

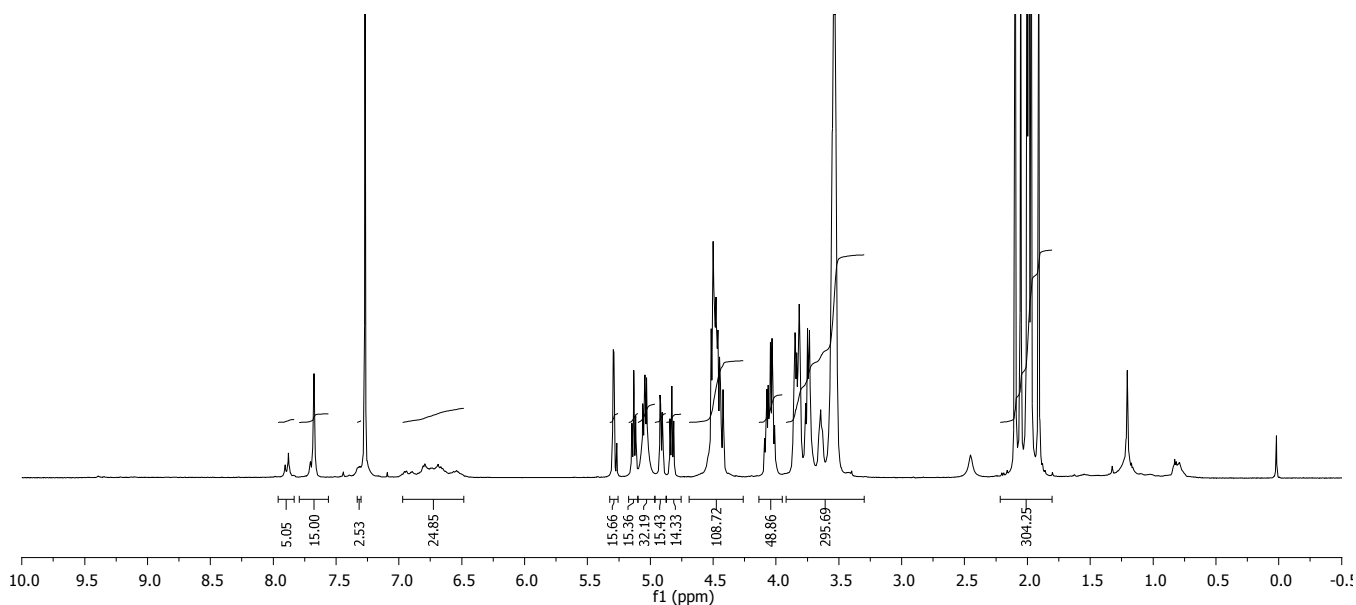

Figure S130.  $^1H$  NMR spectrum of compound **30** ( $CDCl_3$ , 600MHz)

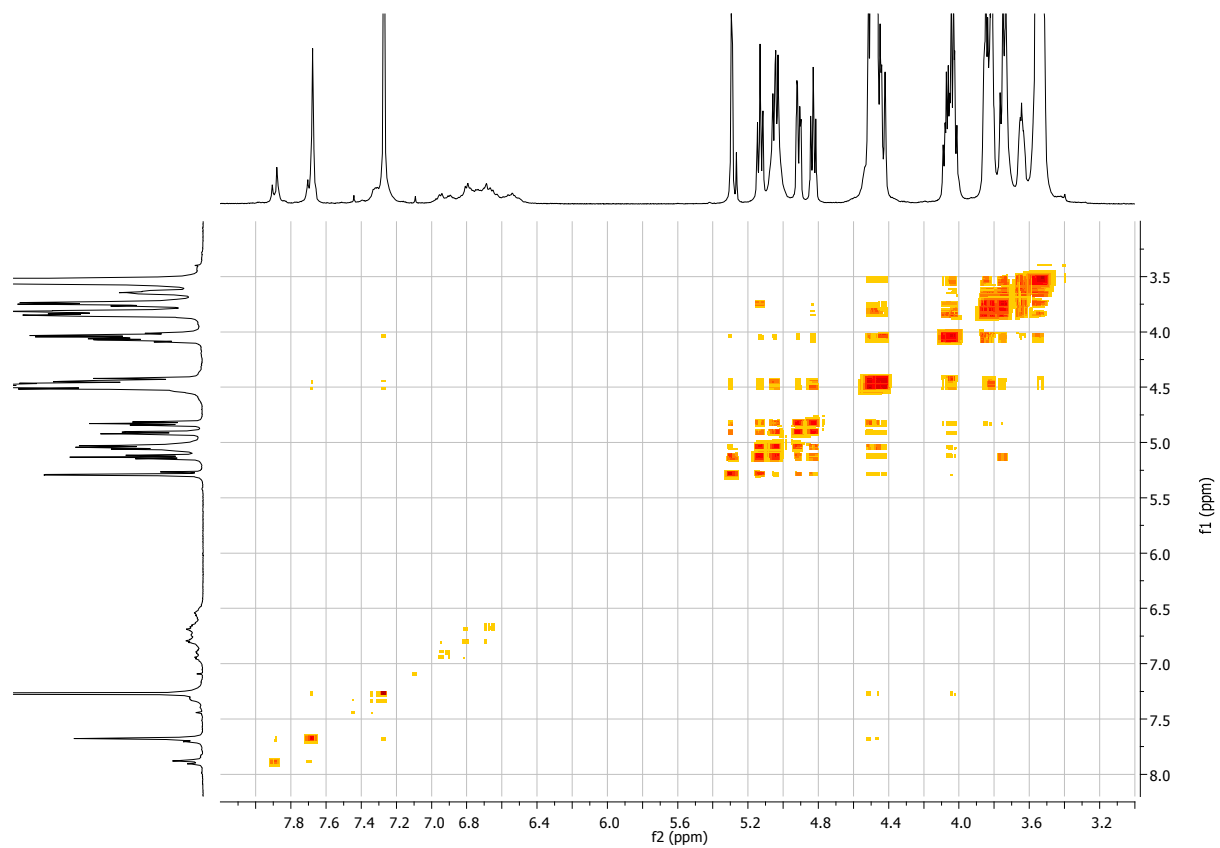

Figure S131. gCOSY spectrum of compound **30**

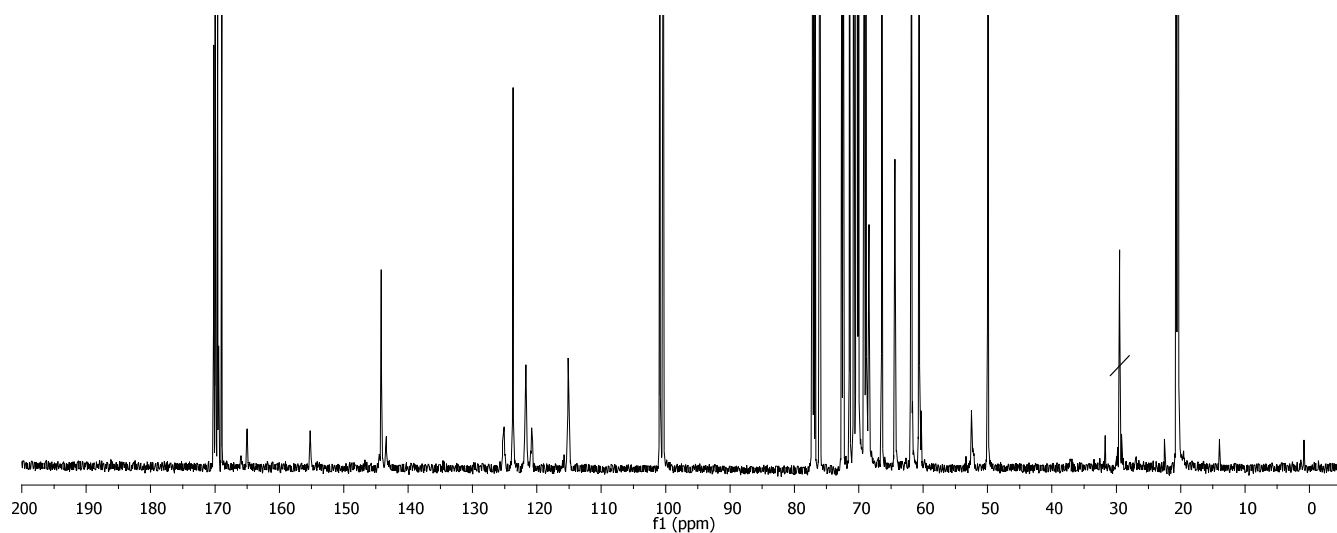

Figure S132.  $^{13}\text{C}$  NMR spectrum of compound **30** ( $\text{CDCl}_3$ , 150MHz)

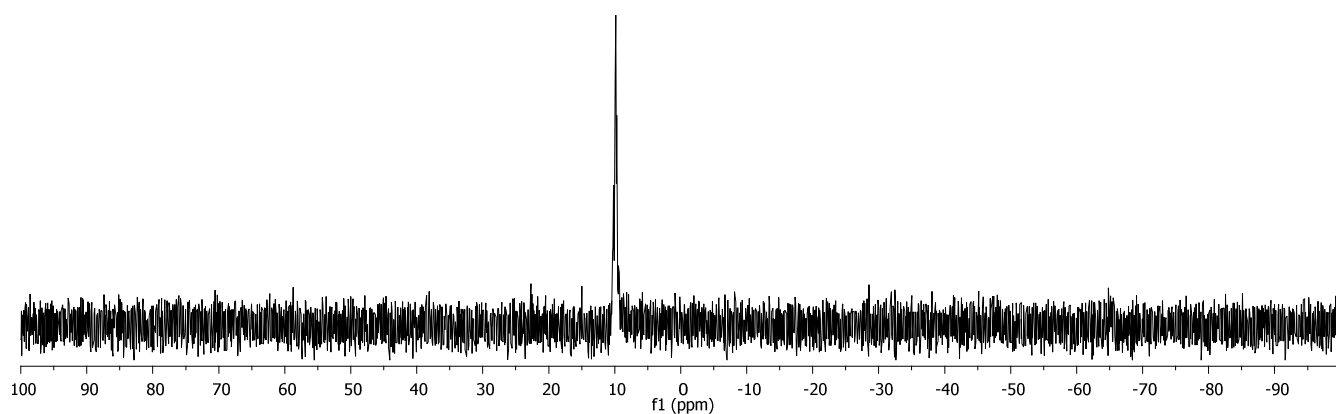

Figure S133.  $^{31}\text{P}$  NMR spectrum of compound **30** ( $\text{CDCl}_3$ , 122MHz)

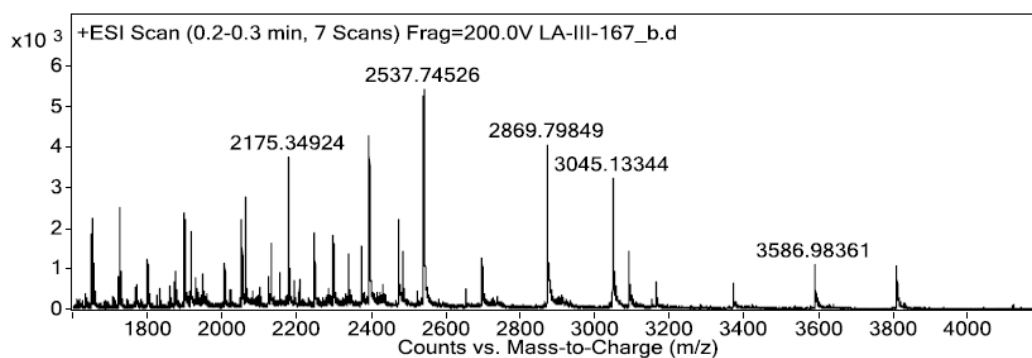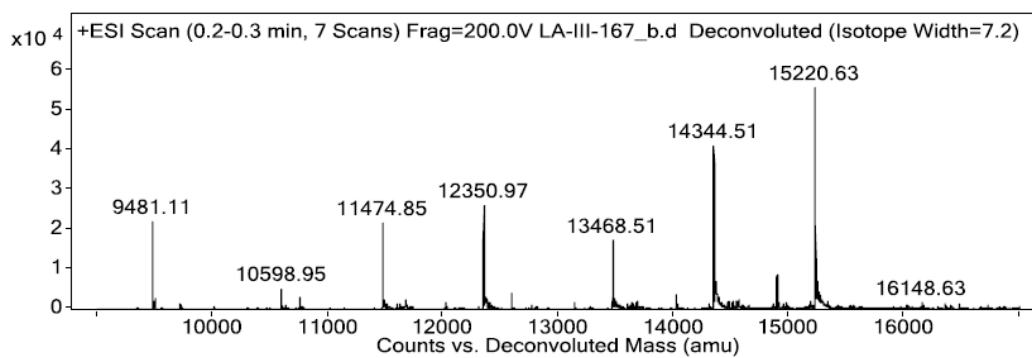

Figure S134. ESI+MS spectrum (deconvolution) of compound **30**

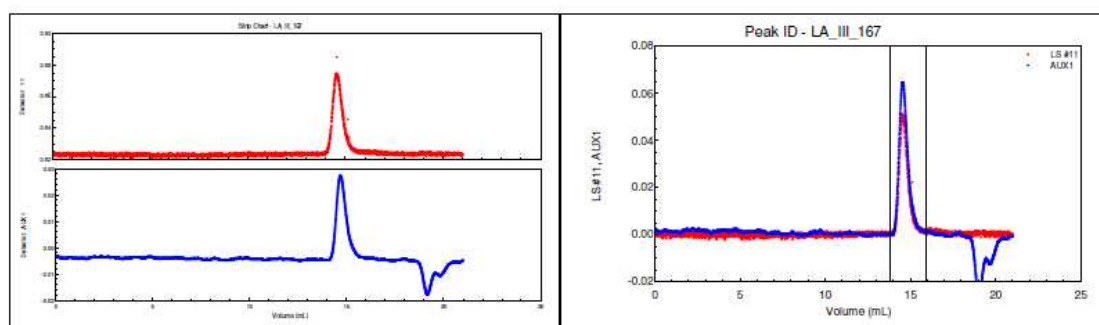

Polydispersity(Mw/Mn) : 1.077±0.160 (15%)  
 Polydispersity(Mz/Mn) : 2.004±0.576 (29%)

Molar Mass Moments (g/mol)  
 Mn : 1.540e+04 (10%)  
 Mw : 1.658e+04 (10%)  
 Mz : 3.087e+04 (26%)

Figure S135. GPC trace (in THF) for compound 30

## AB<sub>25</sub> glycodendron with a focal N<sub>3</sub> **31**

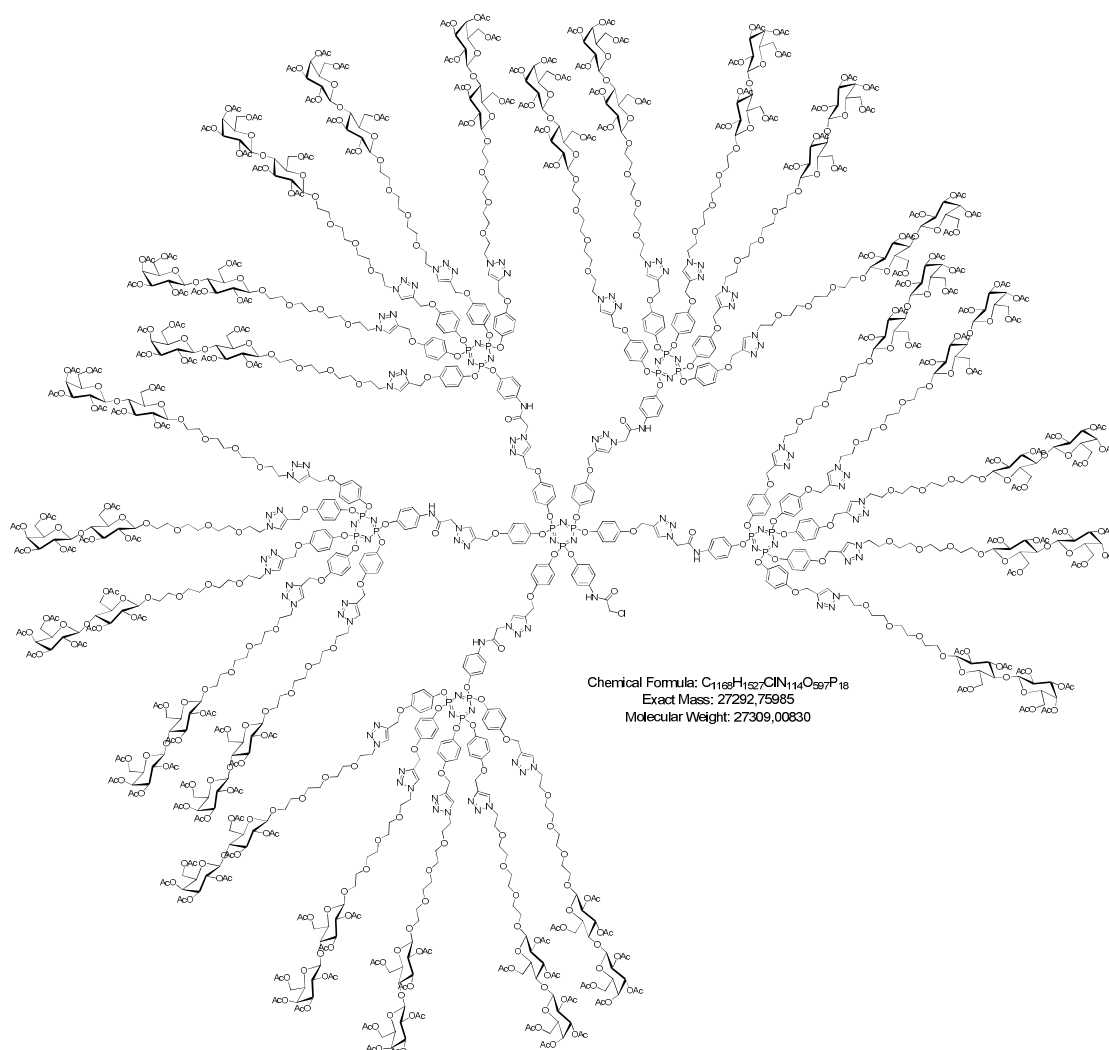

To a solution of cyclotriphosphazene core **6** (1.86 mg, 1.76  $\mu$ mol, 1.0 eq.) in a 1:1 mixture of H<sub>2</sub>O/THF<sub>anh</sub> (5 mL), were added azido derivative **15** (60 mg, 11.4  $\mu$ mol, 6.5 eq.), CuSO<sub>4</sub>·5H<sub>2</sub>O (2.86 mg, 11.4  $\mu$ mol, 6.5 eq.) and sodium ascorbate (2.23 mg, 11.4  $\mu$ mol, 6.5 eq.). While stirring, the mixture was first heated at 50°C for 3 hours in a 20 mL vial and at room temperature for additional 18 hours. Ethyl acetate (15 mL) was added and the solution was poured into a separatory funnel containing ethyl acetate (10 mL), washed with saturated aqueous NH<sub>4</sub>Cl (2x10 mL), water (10 mL) and brine (5 mL). Organics were collected, dried over Na<sub>2</sub>SO<sub>4</sub> and concentrated to dryness *in vacuo* with rotary evaporator. Purification by flash chromatography (SiO<sub>2</sub>, DCM/MeOH 100:0 to 85:15) afforded desired multivalent compound **31** (40.0 mg, 1.46  $\mu$ mol, **83%**) as a yellowish foam.

R<sub>f</sub> = 0.32, DCM/MeOH 92:8.

<sup>1</sup>H NMR (600 MHz, CDCl<sub>3</sub>,  $\delta$  ppm): 10.15 (br s, 5H, NH), 9.45 (br s, 1H, NHCOCH<sub>2</sub>Cl), 8.03 + 7.98 (2xs, 5H, H<sub>int</sub>.triazole), 7.89-7.83 (m, 25H, H<sub>ext</sub>.triazole), 7.35-7.30 (m, 12H, CH<sub>b</sub>), 6.97-6.54 (m, 132H, CH<sub>b</sub>, CH<sub>c</sub>, CH<sub>c'</sub>), 5.40 (br s,

10H, N<sub>triazole</sub>CH<sub>2</sub>CONH), 5.32 (d<sub>app</sub>, 25H, H<sub>4gal</sub>), 5.17-5.04 (m, 110H, H<sub>3glc</sub>, C<sub>q</sub>CH<sub>2</sub>O, H<sub>2gal</sub>), 4.93 (dd, <sup>3</sup>J<sub>2,3</sub> = 3.3 Hz, <sup>3</sup>J<sub>3,4</sub> = 7.1 Hz, 25H, H<sub>3gal</sub>), 4.87-4.82 (m, 25H, H<sub>2glc</sub>), 4.54-4.42 (m, 125H, CH<sub>2</sub>N, H<sub>1glc</sub>, H<sub>6aglc</sub>, H<sub>1gal</sub>), 4.22 (br s, 2H, NHCOCH<sub>2</sub>Cl), 4.11-4.02 (m, 75H, H<sub>6bglc</sub>, H<sub>6agal</sub>, H<sub>6bgal</sub>), 3.92-3.44 (m, 425H, H<sub>5gal</sub>, H<sub>5glc</sub>, H<sub>4glc</sub>, OCH<sub>2</sub>), 2.11-1.92 (m, 525H, COCH<sub>3</sub>).

<sup>13</sup>C NMR (150 MHz, CDCl<sub>3</sub>, δ ppm): 170.3, 170.2, 170.0, 169.9, 169.7, 169.5, 169.0 (7xs, COCH<sub>3</sub>), 164.4 (C=O), 163.9 (C=O), 155.2 (C<sub>a</sub>), 146.6 (C<sub>d'</sub>), 144.5 (C<sub>d</sub>), 144.2 (C<sub>d</sub>), 143.5 (C<sub>triazole</sub>=CH), 143.3 (C<sub>triazole</sub>=CH), 134.8 (C<sub>a</sub>), 125.3 (C<sub>triazole</sub>=CH), 124.6 (C<sub>triazole</sub>=CH), 124.1 (C<sub>triazole</sub>=CH), 121.9 (C<sub>c</sub>), 121.8 (C<sub>b</sub>), 120.9 (C<sub>c</sub>), 120.8 (C<sub>c</sub>), 116.0 (C<sub>b</sub>), 115.3 (C<sub>b</sub>), 115.1 (C<sub>b</sub>), 101.0 (C<sub>1gal</sub>), 100.5 (C<sub>1glc</sub>), 76.2 (C<sub>4glc</sub>), 72.7 (C<sub>3glc</sub>), 72.5 (C<sub>5glc</sub>), 71.5 (C<sub>2glc</sub>), 70.9 (C<sub>3gal</sub>), 70.5 (C<sub>5gal</sub>), 70.5, 70.4, 70.4, 70.3, 70.2, 70.1, 70.1, 69.3, 69.1, 69.0 (OCH<sub>2</sub>), 68.9 (C<sub>2gal</sub>), 68.9 (OCH<sub>2</sub>), 66.5 (C<sub>4gal</sub>), 62.1 (OCH<sub>2</sub>C=C), 61.9 (C<sub>6glc</sub>), 61.6 (OCH<sub>2</sub>), 60.7 (C<sub>6gal</sub>), 52.7 (N<sub>triazole</sub>CH<sub>2</sub>CONH), 50.3 (NCH<sub>2</sub>), 50.1 (NCH<sub>2</sub>), 43.5 (NHCOCH<sub>2</sub>Cl), 20.8, 20.7, 20.6, 20.5, 20.5, 20.4 (7xs, COCH<sub>3</sub>).

<sup>31</sup>P NMR (122 MHz, CDCl<sub>3</sub>, δ ppm): 10.2-9.7 (m, 18P).

*m/z* MALDI-TOF (DHB matrix) for C<sub>1168</sub>H<sub>1527</sub>ClN<sub>114</sub>O<sub>597</sub>P<sub>18</sub> = 27309.0 ; found 27241.4.

NMR diffusion studies (CDCl<sub>3</sub>): *D* = 1.19 × 10<sup>-10</sup> m<sup>2</sup>/s; *d<sub>s</sub>* = 6.8 nm.

GPC measurements (CHCl<sub>3</sub>/Et<sub>3</sub>N (1%)): *M<sub>w</sub>* = 26040 ; *M<sub>n</sub>* = 25230 , PDI (*M<sub>w</sub>*/*M<sub>n</sub>*) = 1.032.

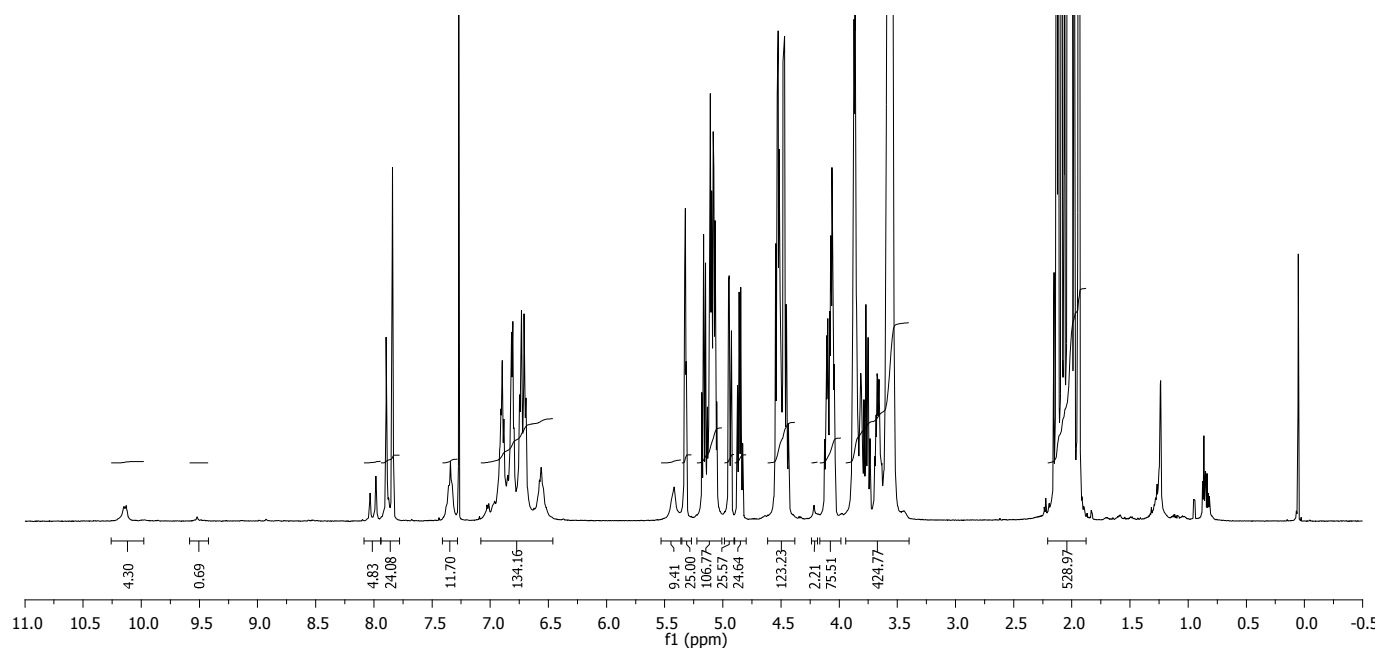

Figure S136. <sup>1</sup>H NMR spectrum of compound **31** (CDCl<sub>3</sub>, 600MHz)

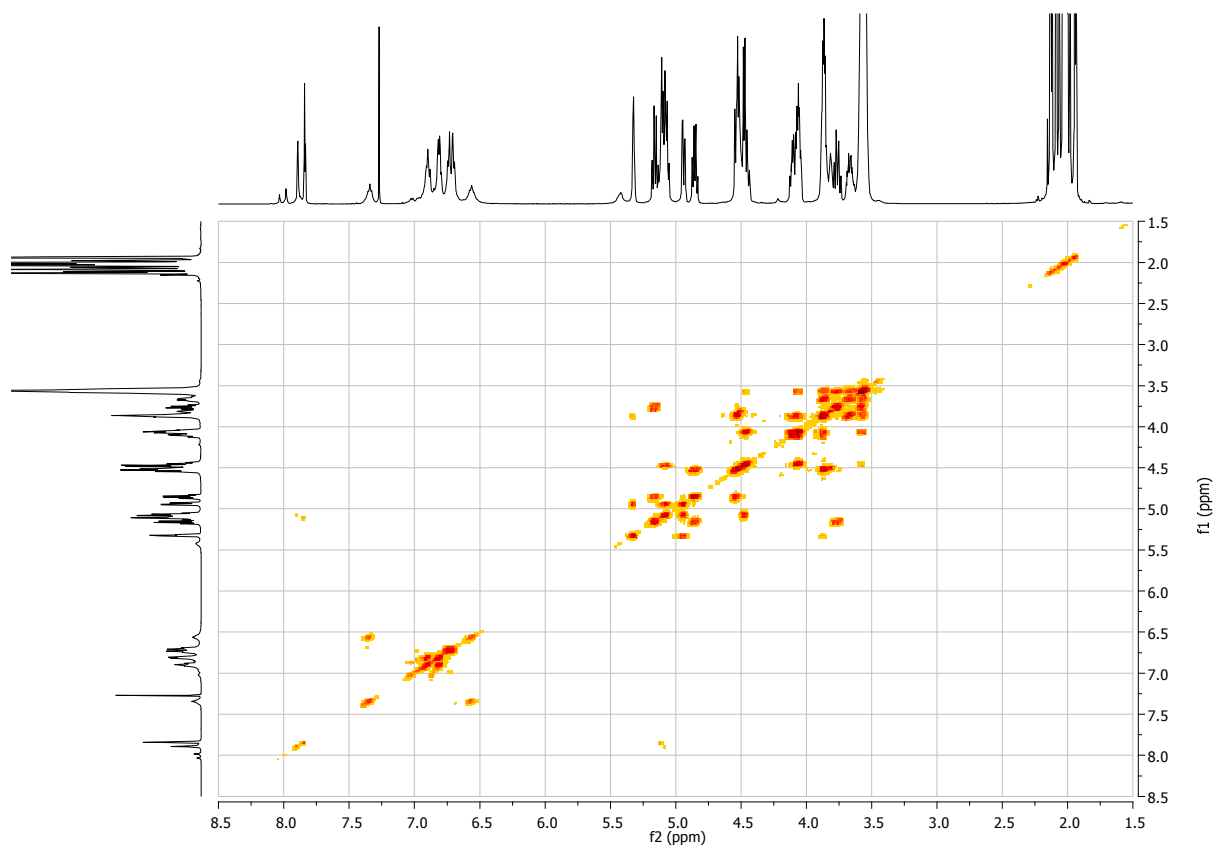

Figure S137. gCOSY spectrum of compound **31**

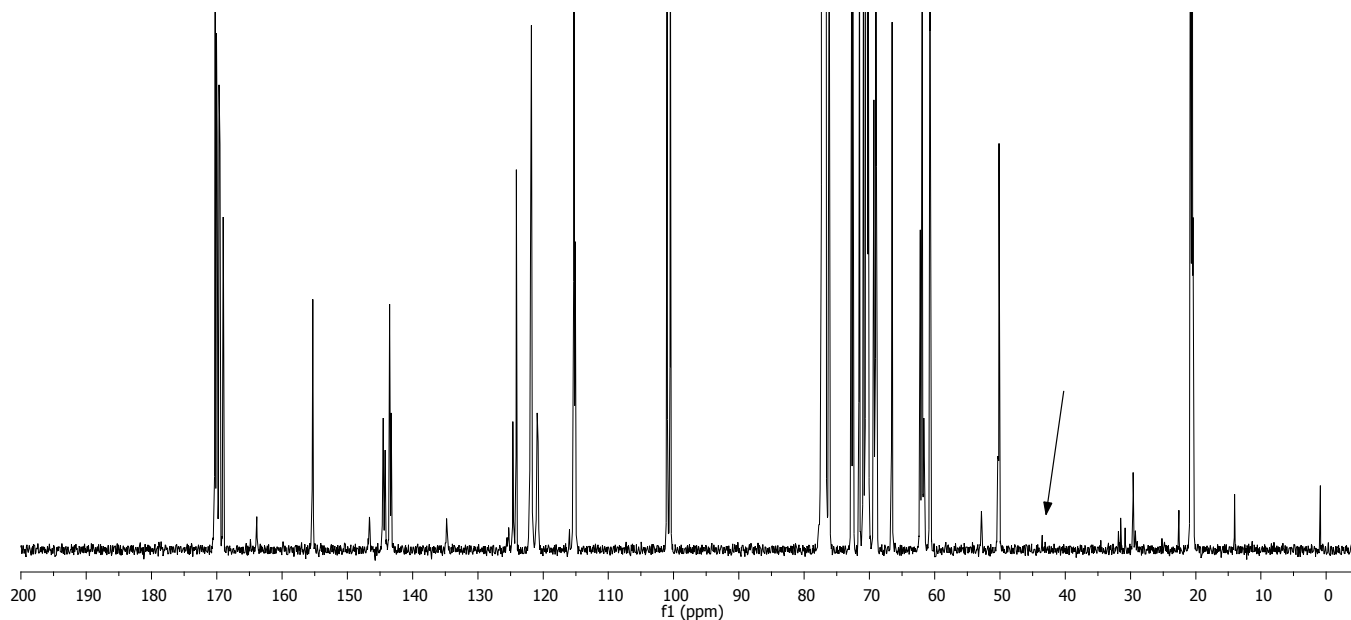

Figure S138.  $^{13}\text{C}$  NMR spectrum of compound **31** ( $\text{CDCl}_3$ , 150MHz)

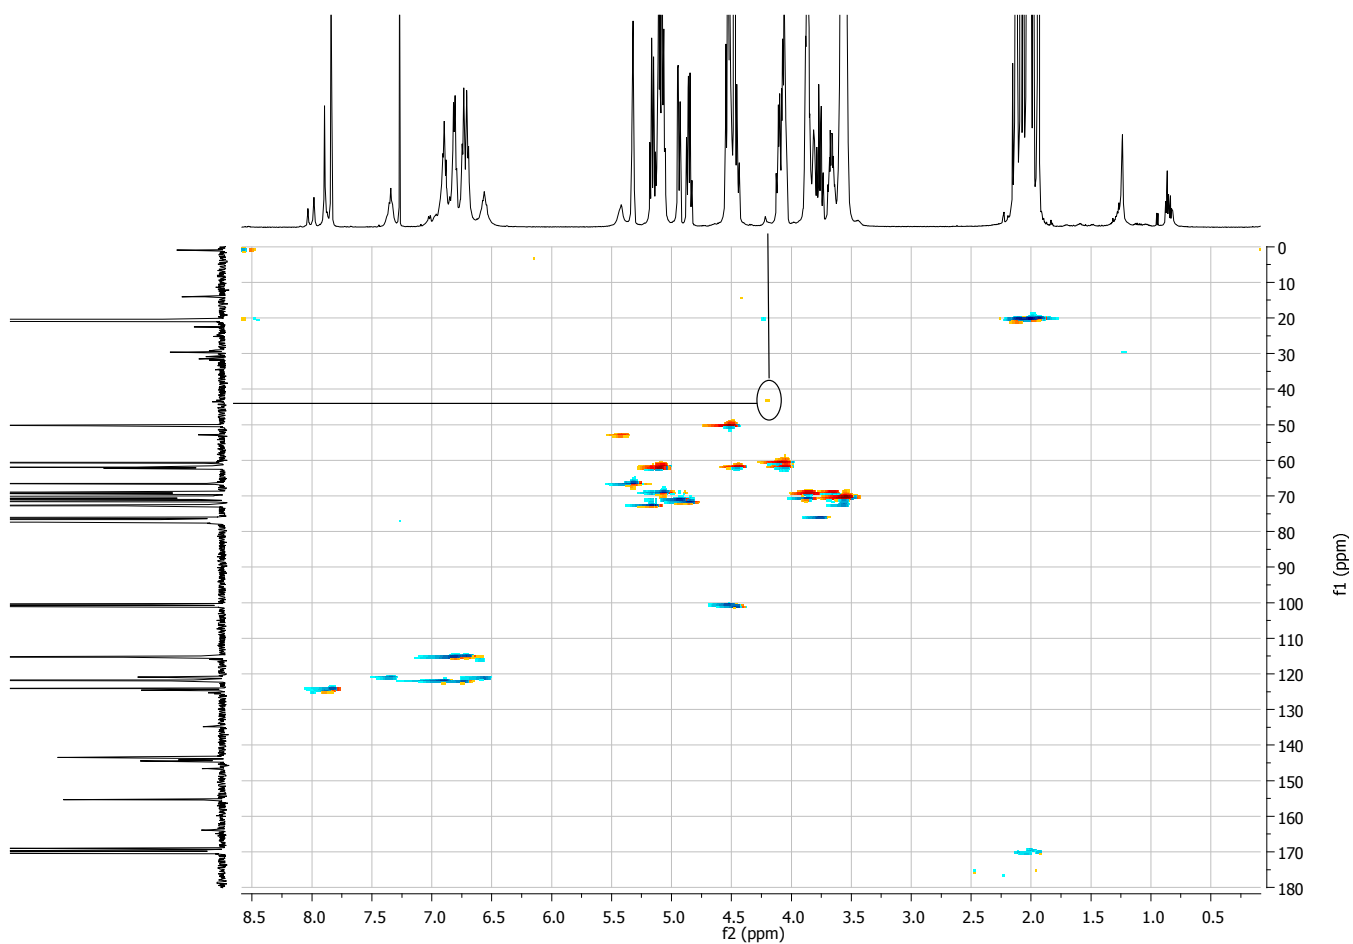

Figure S139. HETCOR spectrum of compound **31**

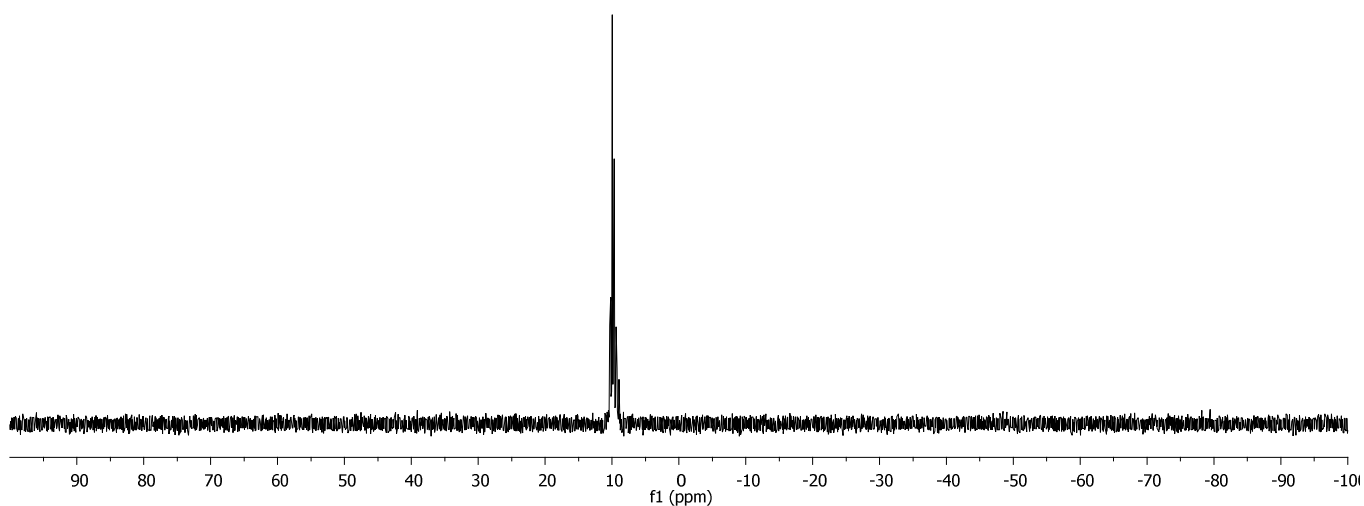

Figure S140.  $^{31}\text{P}$  NMR spectrum of compound **31** ( $\text{CDCl}_3$ , 122MHz)



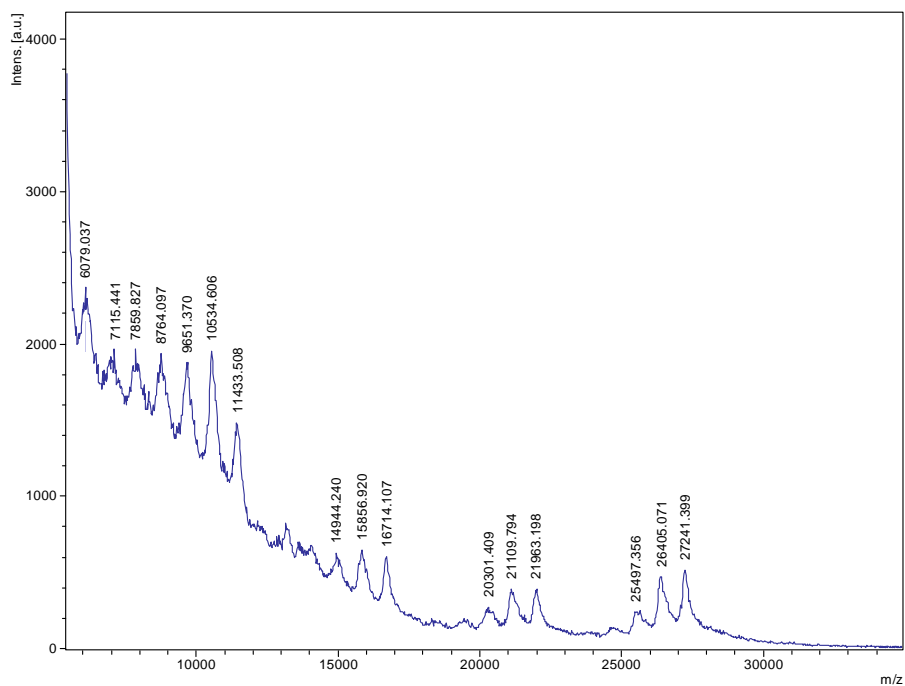

Figure S141. MALDI-TOF spectrum (DHB matrix) of compound **31**

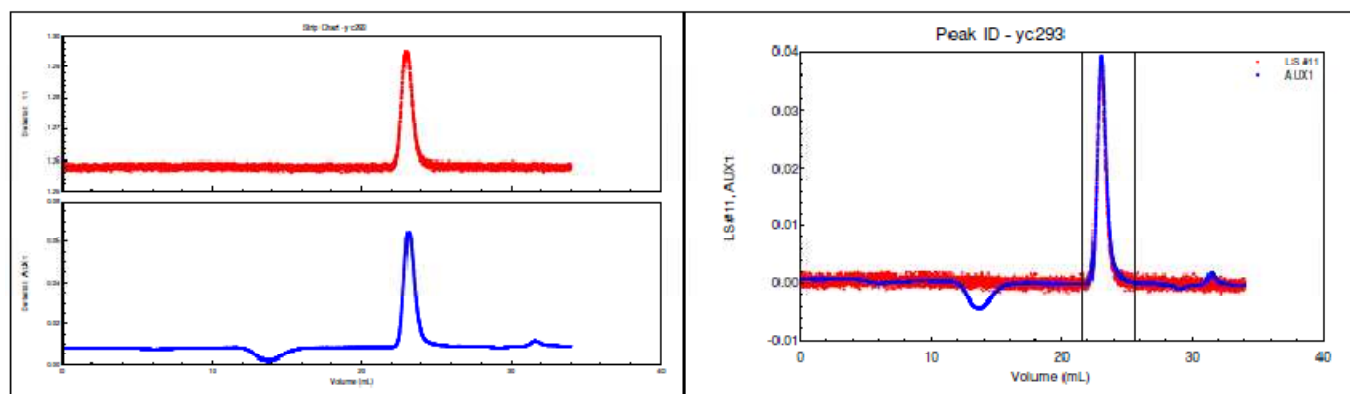

Polydispersity(Mw/Mn) : 1.032±0.146 (14%)  
 Polydispersity(Mz/Mn) : 1.176±0.431 (37%)

Molar Mass Moments (g/mol)  
 Mn : 2.523e+04 (9%)  
 Mw : 2.604e+04 (10%)  
 Mz : 2.967e+04 (35%)

Figure S142. GPC trace (CHCl<sub>3</sub>/Et<sub>3</sub>N (1%)) for compound **31**

## Hypercore with 20 peripheral propargylic functions **34**

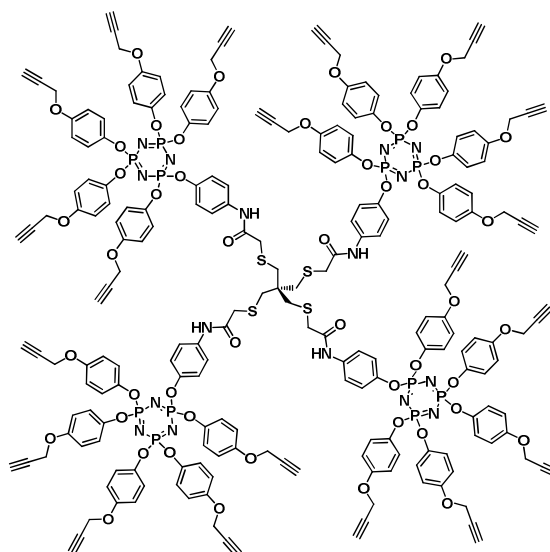

To a solution of tetrathioacetylated pentaerythritol core **32** (3.42 mg, 9.28  $\mu\text{mol}$ , 1.0 eq.) and chloroacetamide dendron **6** (51.0 mg, 48.3  $\mu\text{mol}$ , 5.2 eq.) in dry EtOH (1.5 mL) were added at room temperature finely ground NaOH (2.97 mg, 74.3  $\mu\text{mol}$ , 8.0 eq.) and NaBH<sub>4</sub> (3.00 mg, 74.4  $\mu\text{mol}$ , 8.0 eq.) under a nitrogen atmosphere. The white solution was warmed up to 35°C for 3 h.. Insoluble brown oil quickly formed corresponding to the desired compound. The solvent was then removed *via* syringe and the residual oil was rinsed once with cold EtOH while stirring (2x2.5 mL). Finally, the oil was solubilized in CH<sub>2</sub>Cl<sub>2</sub> and purified by column chromatography (SiO<sub>2</sub>, CH<sub>2</sub>Cl<sub>2</sub>/MeOH 100:0 to 99:1) to afford desired icosapropargylated core **34** (31.0 mg, 7.71  $\mu\text{mol}$ , **83%**) as an off-white foam.

R<sub>f</sub> = 0.29, CH<sub>2</sub>Cl<sub>2</sub>/MeOH 98:2

<sup>1</sup>H NMR (600 MHz, CDCl<sub>3</sub>,  $\delta$  ppm): 8.53 (br s, 4H, NH), 7.39 (d, 8H, *J* = 9.0 Hz, CH<sub>b</sub>), 6.88-6.76 (m, 88H, CH<sub>b</sub>, CH<sub>c</sub>, CH<sub>c</sub>), 4.63 (m, 40H, OCH<sub>2</sub>C $\equiv$ CH), 3.39 (br s, 8H, SCH<sub>2</sub>CONH), 2.84 (br s, 8H, C<sub>q</sub>CH<sub>2</sub>S), 2.54 (m, 20H, C $\equiv$ CH).

<sup>13</sup>C NMR (150 MHz, CDCl<sub>3</sub>,  $\delta$  ppm): 166.4 (C=O), 154.5 (C<sub>a</sub>), 147.1 (C<sub>d</sub>), 144.7 (C<sub>d</sub> (x2)), 134.3 (C<sub>a</sub>), 121.8 (C<sub>c</sub> (x2)), 121.4 (C<sub>b</sub>), 121.0 (C<sub>c</sub>), 115.4 (C<sub>b</sub> (x2)), 78.6 (C $\equiv$ CH), 78.4 (C $\equiv$ CH), 76.0 (C $\equiv$ CH), 75.8 (C $\equiv$ CH (x2)), 56.2 (OCH<sub>2</sub> (x3)), 44.0 (C<sub>q</sub>), 38.5 (SCH<sub>2</sub>CONH), 37.4 (C<sub>q</sub>CH<sub>2</sub>S).

<sup>31</sup>P NMR (122 MHz, CDCl<sub>3</sub>,  $\delta$  ppm): 9.71 (t<sub>app</sub>, 12P).

*m/z* (ESI<sup>+</sup>-MS) for C<sub>217</sub>H<sub>176</sub>N<sub>16</sub>O<sub>48</sub>P<sub>12</sub>S<sub>4</sub> = 2137.3851 [*M*+2H]<sup>2+</sup>; found 2137.3857; 1425.2592 [*M*+3H]<sup>3+</sup>; found 1425.2595.

GPC measurements (CHCl<sub>3</sub>): M<sub>w</sub> = 4625 ; M<sub>n</sub> = 4540 , PDI (M<sub>w</sub>/M<sub>n</sub>) = 1.019.

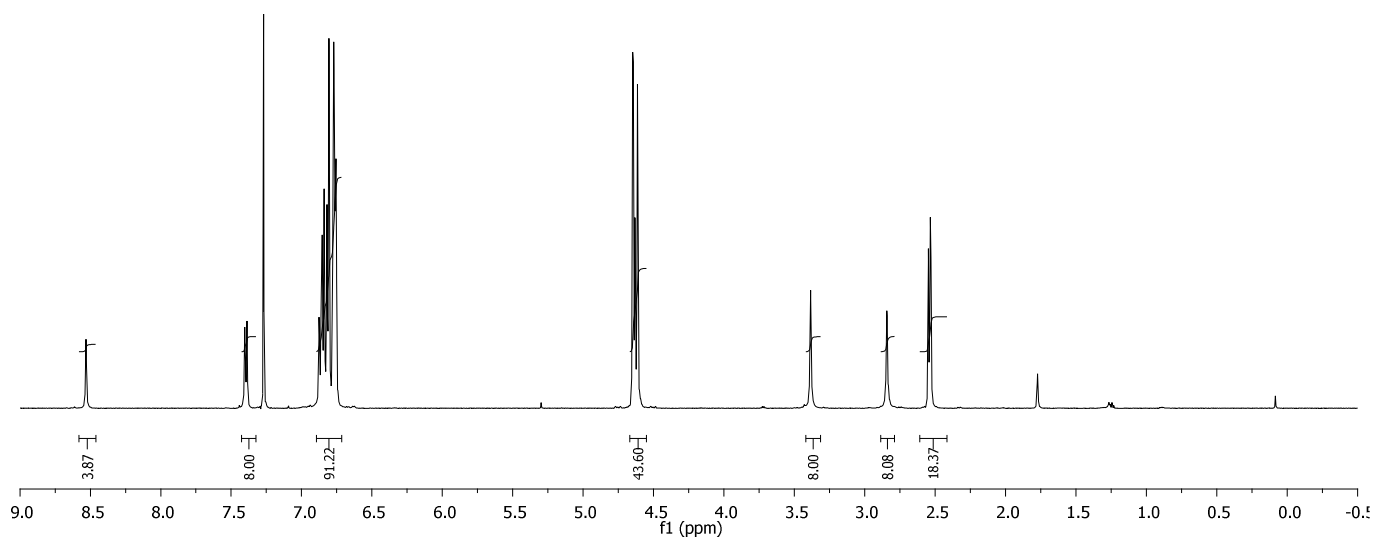

Figure S143.  $^1\text{H}$  NMR spectrum of compound **34** ( $\text{CDCl}_3$ , 600MHz)

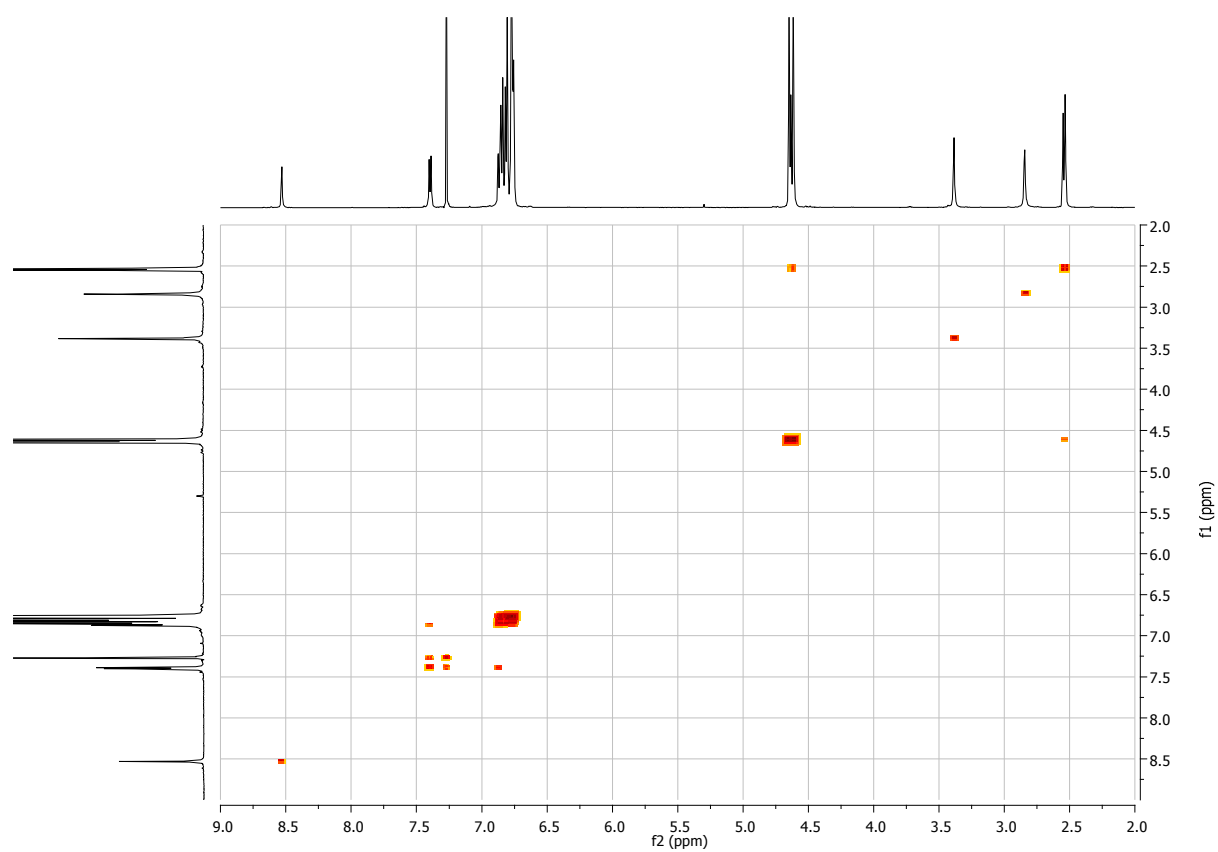

Figure S144. gCOSY spectrum of compound **34**

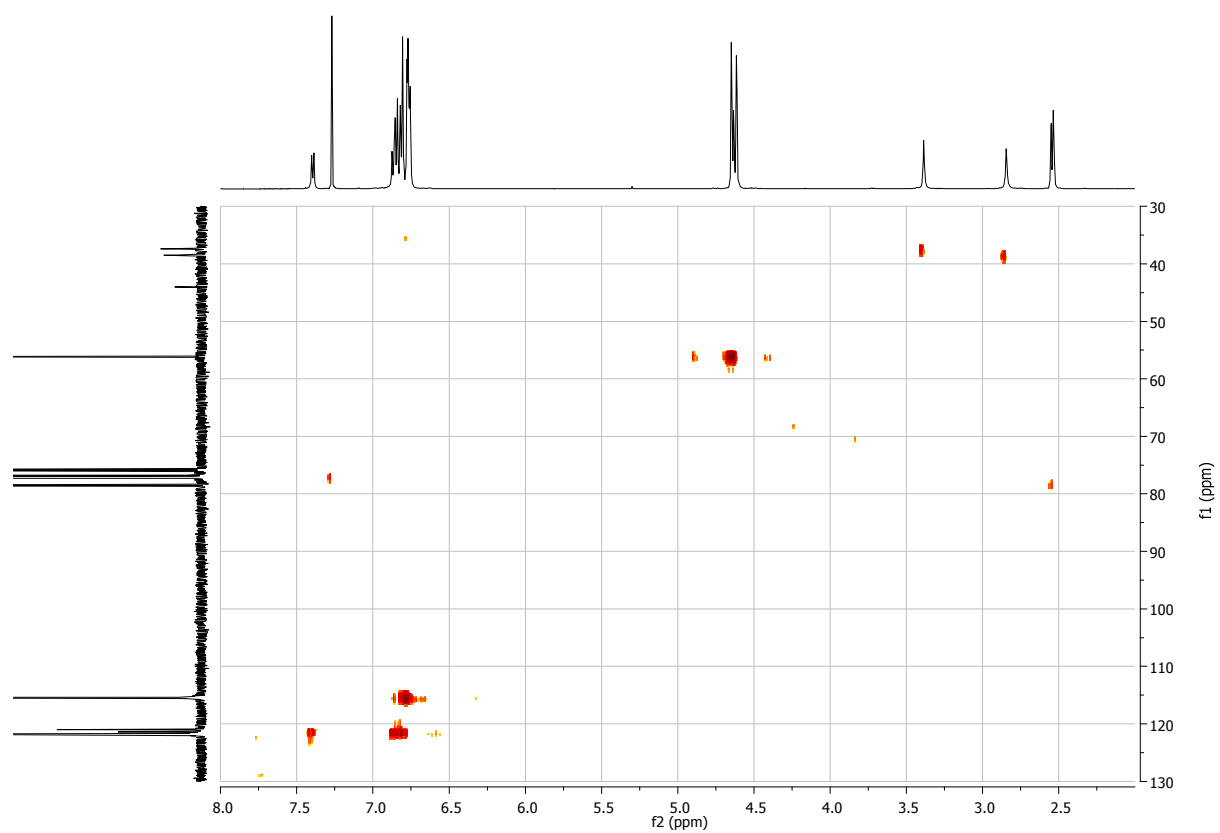

Figure S145. HETCOR spectrum of compound **34**

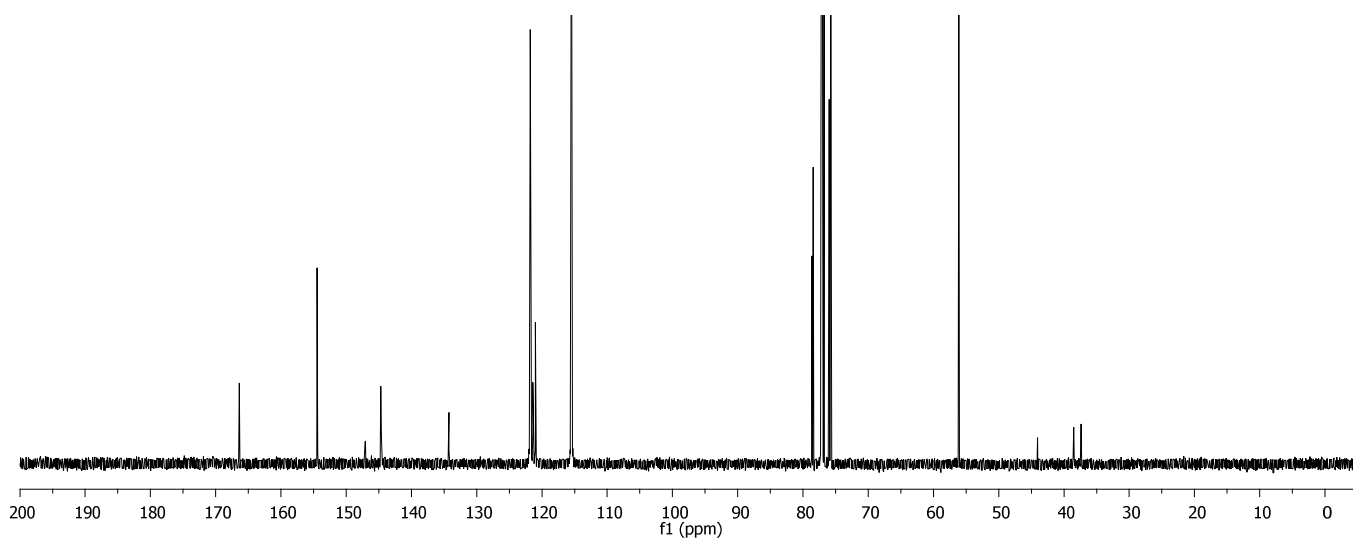

Figure S146.  $^{13}\text{C}$  NMR spectrum of compound **34** ( $\text{CDCl}_3$ , 150MHz)

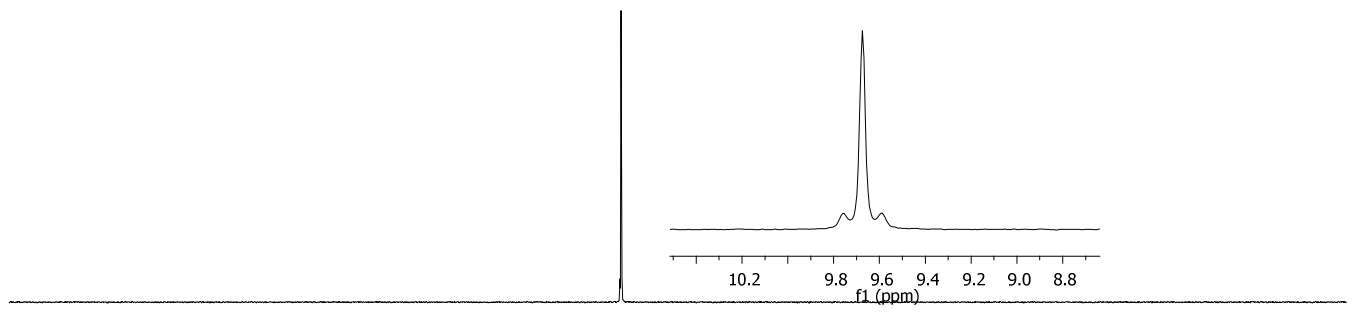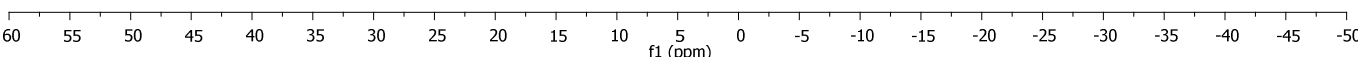

Figure S147. <sup>31</sup>P NMR spectrum of compound **34** (CDCl<sub>3</sub>, 122MHz)

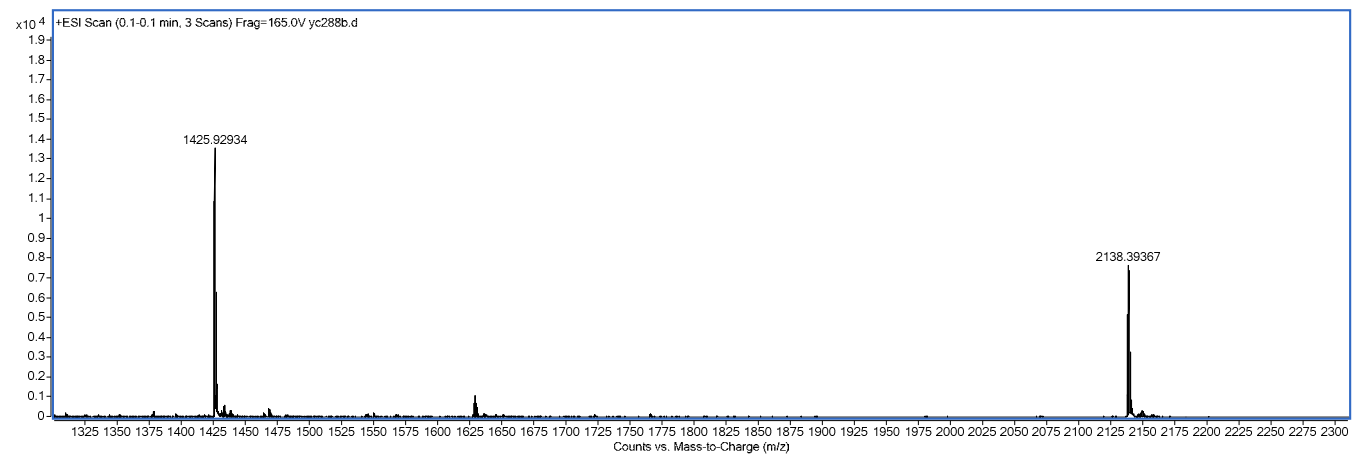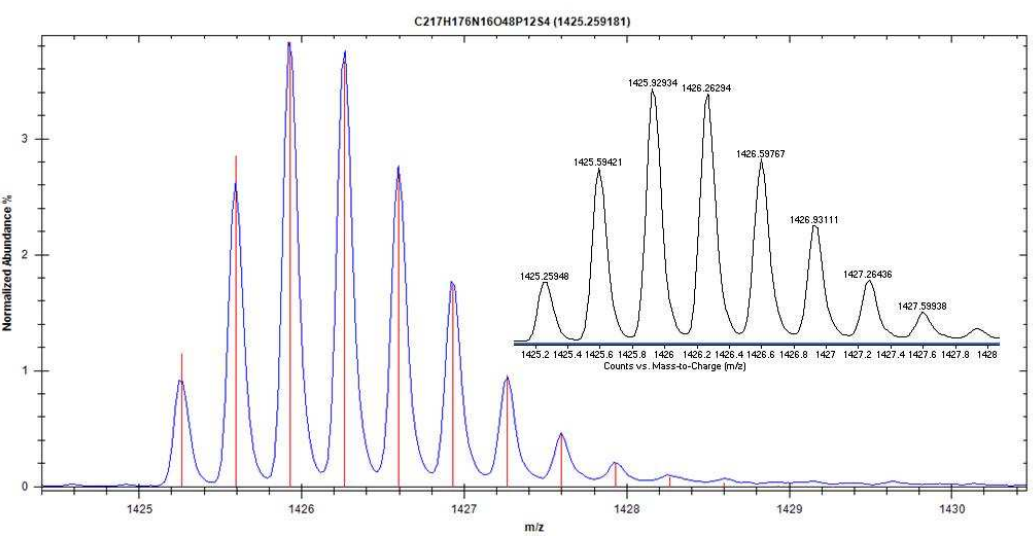

| m/z       | Abund<br>(% largest) | Abund<br>(% sum) | Abund<br>(% first) |
|-----------|----------------------|------------------|--------------------|
| 1425.2592 | 30.03                | 6.48             | 100                |
| 1425.5936 | 74.36                | 16.06            | 247.59             |
| 1425.9278 | 100                  | 21.59            | 332.98             |
| 1426.2618 | 95.61                | 20.65            | 318.36             |
| 1426.5958 | 72.23                | 15.6             | 240.5              |
| 1426.9297 | 45.59                | 9.84             | 151.81             |
| 1427.2636 | 24.88                | 5.37             | 82.85              |
| 1427.5975 | 12.02                | 2.59             | 40.01              |
| 1427.9314 | 5.22                 | 1.13             | 17.38              |
| 1428.2652 | 2.07                 | 0.45             | 6.88               |
| 1428.5991 | 0.75                 | 0.16             | 2.5                |
| 1428.933  | 0.25                 | 0.05             | 0.84               |
| 1429.2668 | 0.08                 | 0.02             | 0.27               |
| 1429.6007 | 0.02                 | 0.01             | 0.08               |

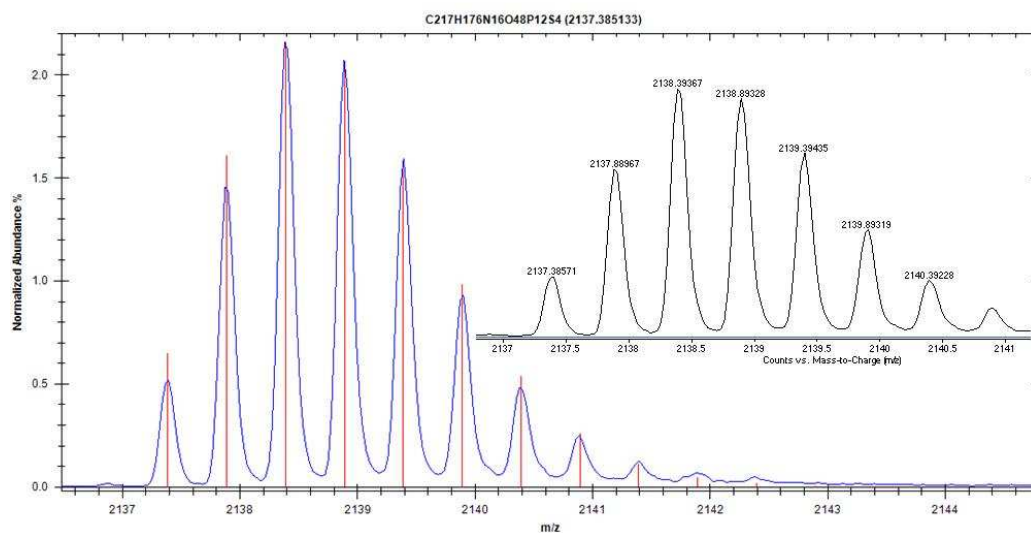

| m/z       | Abund (% largest) | Abund (% sum) | Abund (% first) |
|-----------|-------------------|---------------|-----------------|
| 2137.3851 | 30.03             | 6.49          | 100             |
| 2137.8867 | 74.36             | 16.06         | 247.58          |
| 2138.388  | 100               | 21.59         | 332.95          |
| 2138.8891 | 95.61             | 20.65         | 318.32          |
| 2139.3901 | 72.22             | 15.6          | 240.47          |
| 2139.891  | 45.59             | 9.84          | 151.78          |
| 2140.3918 | 24.88             | 5.37          | 82.84           |
| 2140.8926 | 12.01             | 2.59          | 40              |
| 2141.3934 | 5.22              | 1.13          | 17.38           |
| 2141.8942 | 2.07              | 0.45          | 6.88            |
| 2142.395  | 0.75              | 0.16          | 2.5             |
| 2142.8958 | 0.25              | 0.05          | 0.84            |
| 2143.3966 | 0.08              | 0.02          | 0.27            |
| 2143.8974 | 0.02              | 0.01          | 0.08            |

Figure S148. ESI<sup>+</sup>-HRMS spectrum of compound **34**

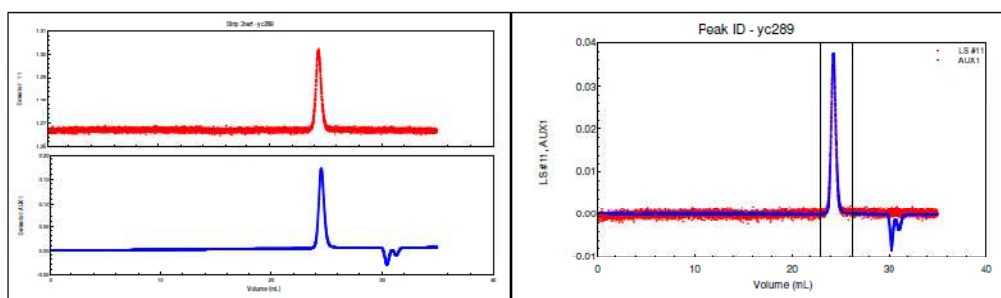

Polydispersity(Mw/Mn) : 1.019±0.158 (15%)  
 Polydispersity(Mz/Mn) : 1.052±0.305 (29%)

Molar Mass Moments (g/mol)  
 Mn : 4.540e+03 (10%)  
 Mw : 4.625e+03 (11%)  
 Mz : 4.776e+03 (26%)

Figure S149. GPC trace (in CHCl<sub>3</sub>) of compound **34**

## Hypercore with 30 peripheral propargylic functions **35**

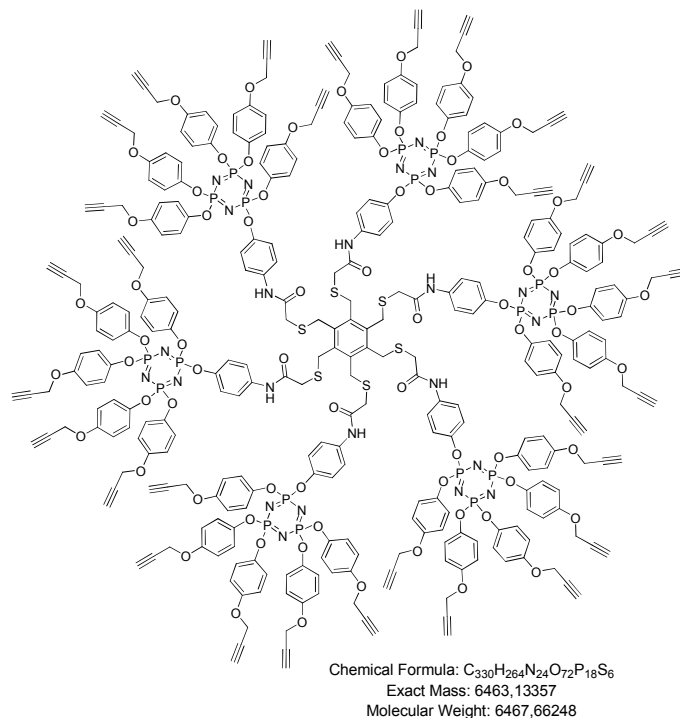

To a solution of hexakis(thioacetyl)benzene core **33**<sup>4</sup> (3.67 mg, 6.02  $\mu$ mol, 1.0 eq.) and chloroacetamide dendron **6** (50.0 mg, 47.4  $\mu$ mol, 7.9 eq.) in dry EtOH (2.0 mL) were added at room temperature finely ground NaOH (3.50 mg, 87.5  $\mu$ mol, 14.5 eq.) and NaBH<sub>4</sub> (3.50 mg, 92.5  $\mu$ mol, 15.3 eq.) under a nitrogen atmosphere. The white solution was warmed up to 35°C for 3 h. and an insoluble oil quickly formed. The solvent was removed *via* syringe and the residual oil was rinsed with EtOAc while stirring (3 $\times$ 10 mL). Finally, the oil was solubilized in CH<sub>2</sub>Cl<sub>2</sub> and purified by column chromatography (SiO<sub>2</sub>, CH<sub>2</sub>Cl<sub>2</sub>/MeOH 100:0 to 99.5:0.5) to afford desired tricontapropargylated core **35** (29 mg, 4.48  $\mu$ mol, **74%**) as an off-white foam. *Degradation occurs after 3 days at -20°C.*

R<sub>f</sub> = 0.11, CH<sub>2</sub>Cl<sub>2</sub>/MeOH 98:2

<sup>1</sup>H NMR (300 MHz, CDCl<sub>3</sub>,  $\delta$  ppm): 8.58 (br s, 6H, NH), 7.42 (d, 12H, *J* = 9.0 Hz, CH<sub>b</sub>), 6.90-6.73 (m, 132H, CH<sub>b</sub>, CH<sub>c</sub>, CH<sub>c</sub>), 4.60 (m, 60H, OCH<sub>2</sub>C $\equiv$ CH), 4.12 (br s, 12H, C<sub>core</sub>CH<sub>2</sub>S), 3.28 (br s, 12H, SCH<sub>2</sub>CONH), 2.53 (m, 30H, C $\equiv$ CH).

<sup>13</sup>C NMR (75 MHz, CDCl<sub>3</sub>,  $\delta$  ppm): 167.7 (C=O), 154.6 (C<sub>a</sub>), 147.2 (C<sub>d</sub>'), 144.7 (C<sub>d</sub>), 136.2 (C<sub>q</sub> core), 134.6 (C<sub>a</sub>), 121.7 (C<sub>c</sub>), 121.5 (C<sub>b</sub>'), 121.2 (C<sub>c</sub>'), 115.4 (C<sub>b</sub>), 78.7 (C $\equiv$ CH), 78.6 (C $\equiv$ CH), 75.9 (C $\equiv$ CH), 75.9 (C $\equiv$ CH), 56.3 (OCH<sub>2</sub>), 56.2 (OCH<sub>2</sub>), 37.8 (SCH<sub>2</sub>CONH), 31.2 (C<sub>core</sub>CH<sub>2</sub>S).

<sup>31</sup>P NMR (122 MHz, CDCl<sub>3</sub>,  $\delta$  ppm): 9.69 (s<sub>app</sub>, 18P).

*m/z* (MALDI-TOF/DHB matrix) for C<sub>330</sub>H<sub>264</sub>N<sub>24</sub>O<sub>72</sub>P<sub>18</sub>S<sub>6</sub> = 6467.6; found 6468.9.

GPC measurements (THF): M<sub>w</sub> = 7152 ; M<sub>n</sub> = 6399 , PDI (M<sub>w</sub>/M<sub>n</sub>) = 1.12.

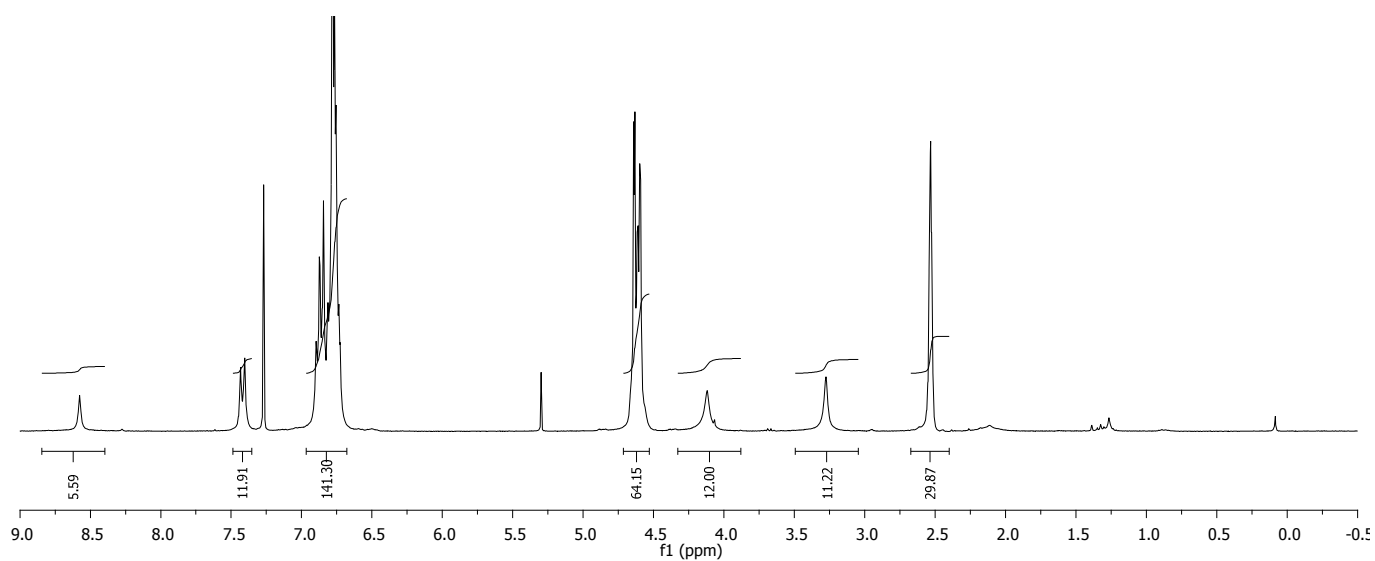

**Figure S150.**  $^1\text{H}$  NMR spectrum of compound **35** ( $\text{CDCl}_3$ , 300MHz)

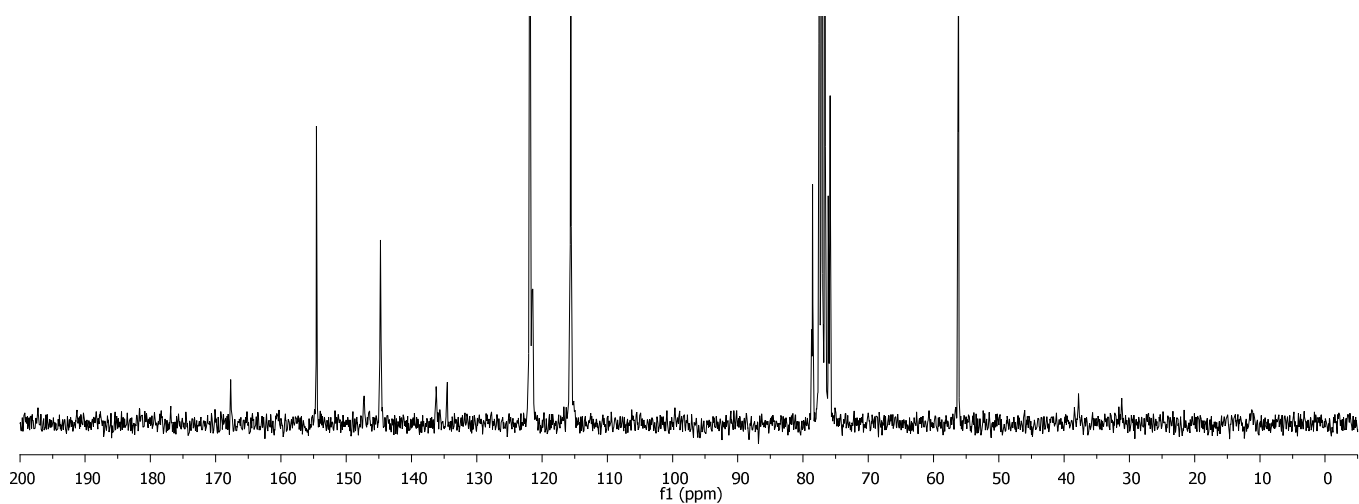

**Figure S151.**  $^{13}\text{C}$  NMR spectrum of compound **35** ( $\text{CDCl}_3$ , 75MHz)



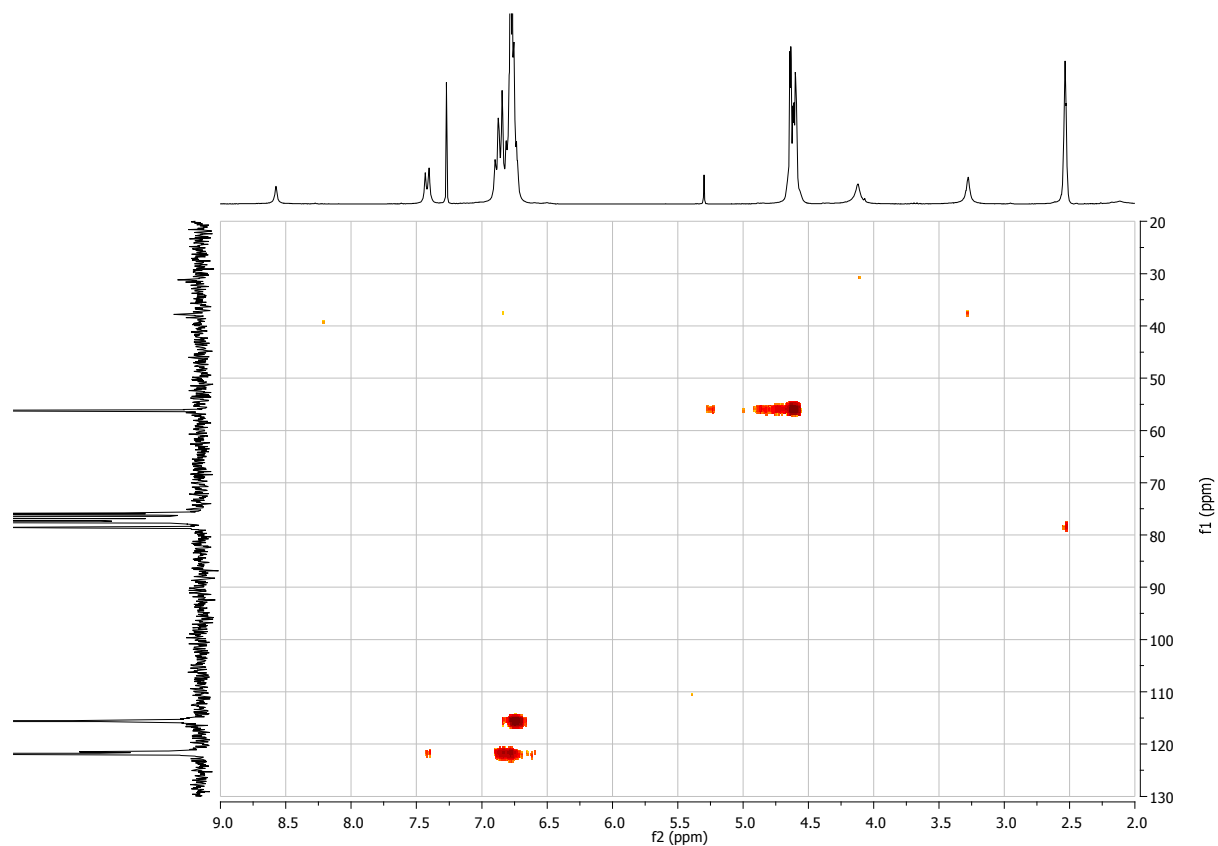

Figure S152. HETCOR spectrum of compound **35**

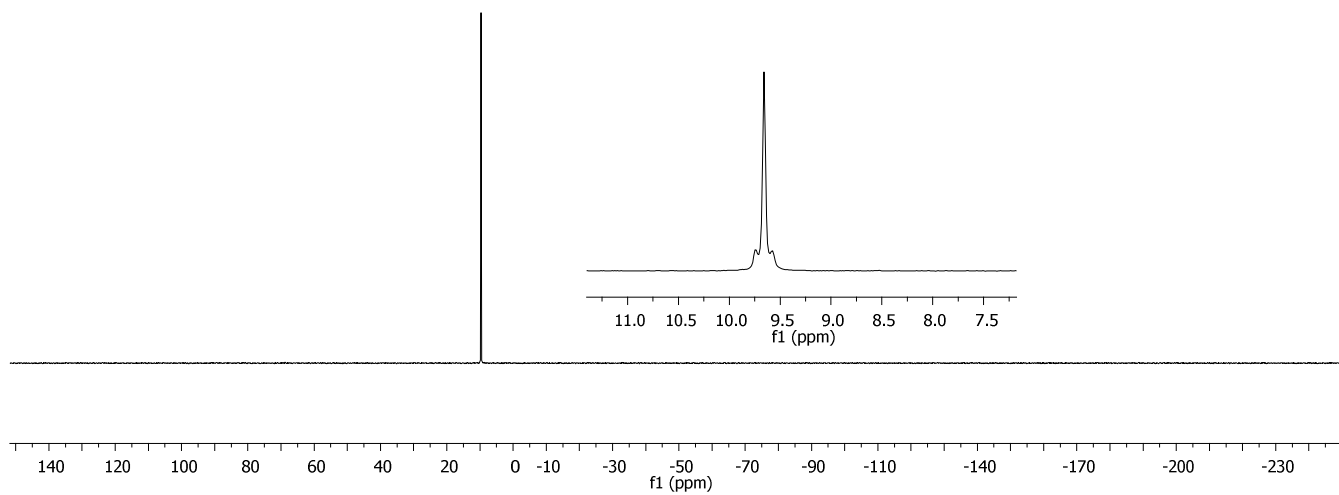

Figure S153.  $^{31}\text{P}$  NMR spectrum of compound **35** ( $\text{CDCl}_3$ , 122MHz)

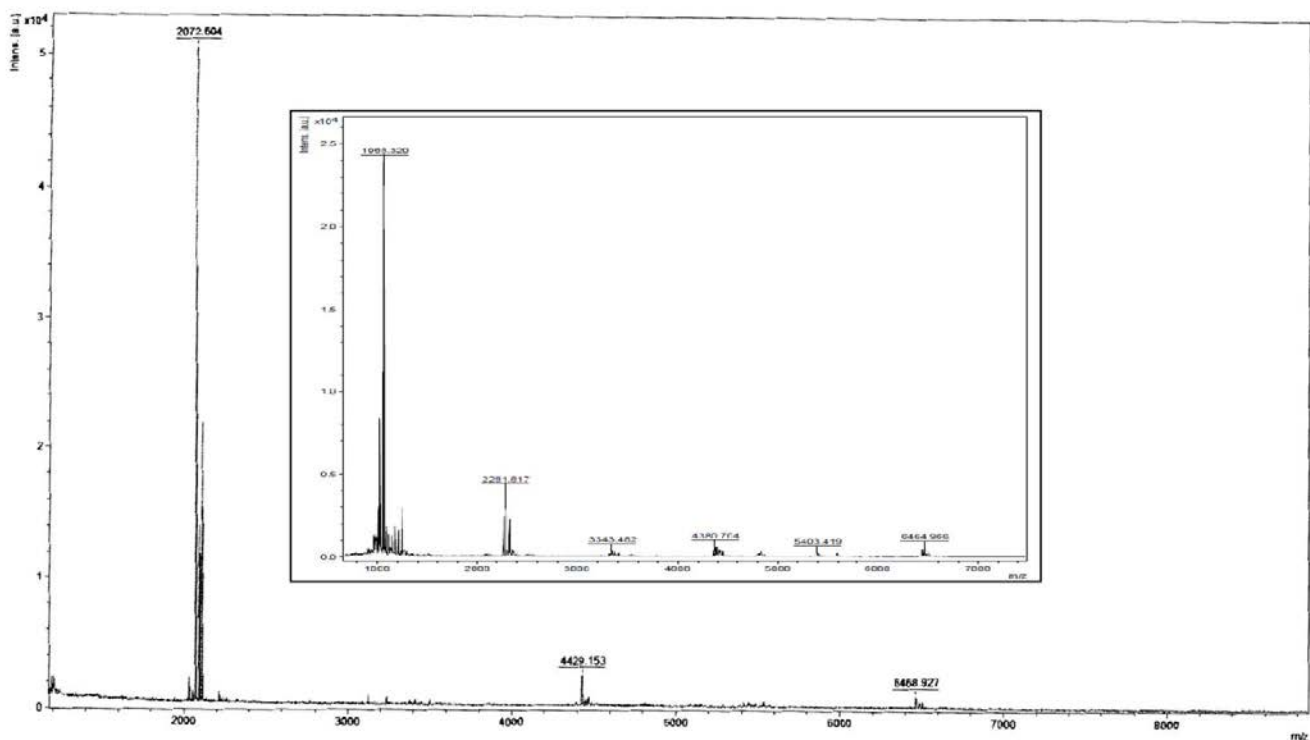

Figure S154. MALDI-TOF (DHB matrix) spectrum of compound **35** (insert: MALDI-TOF of **35**, 3 days after synthesis)

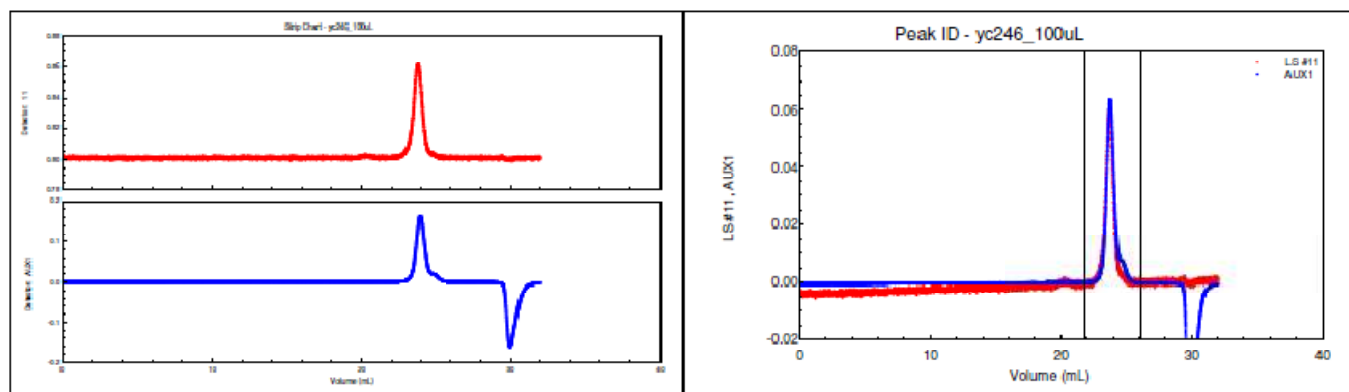

Polydispersity(Mw/Mn) : 1.118±0.150 (13%)  
 Polydispersity(Mz/Mn) : 1.248±0.326 (26%)

Molar Mass Moments (g/mol)  
 Mn : 6.399e+03 (9%)  
 Mw : 7.152e+03 (9%)  
 Mz : 7.985e+03 (24%)

Figure S155. GPC trace (in THF) for compound **35**

## Icosavalent glycodendrimer **36**

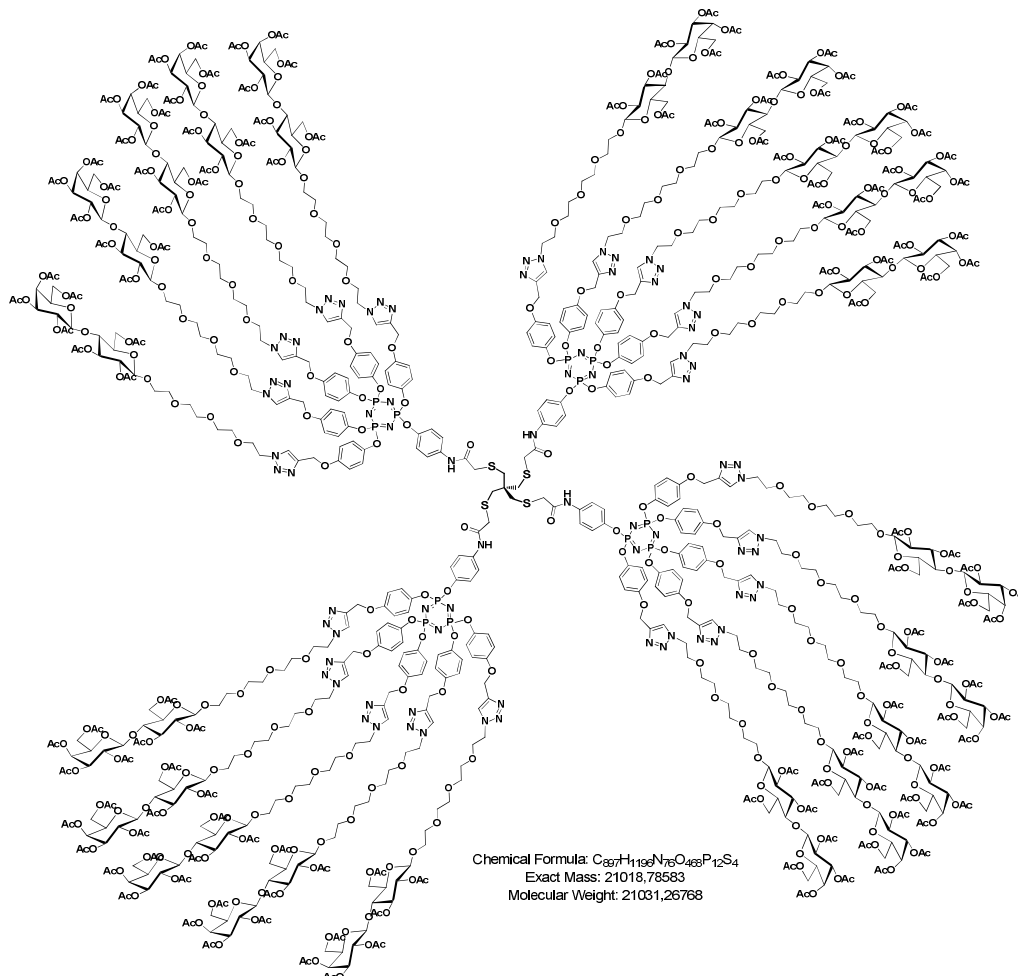

To a solution of icosapropargylated core **34** (11.0 mg, 2.58  $\mu$ mol, 1.0 eq.) in a 1:1 mixture of H<sub>2</sub>O/THF (4.0 mL) were added azido derivative **10** (72.0 mg, 0.086 mmol, 33.3 eq.), CuSO<sub>4</sub>·5H<sub>2</sub>O (17.4 mg, 0.069 mmol, 27.0 eq.) and sodium ascorbate (13.7 mg, 0.069 mmol, 27.0 eq.). While stirring, the mixture was first heated at 50°C for 3 hours in a 20 mL vial and at room temperature for additional 18 hours. Noteworthy is the fact that 5 mg of CuSO<sub>4</sub>·5H<sub>2</sub>O and 4 mg of sodium ascorbate were added to the solution after the 3 hours of heating. Ethyl acetate (15 mL) was added and the solution was poured into a separatory funnel containing ethyl acetate (10 mL), washed with saturated aqueous NH<sub>4</sub>Cl (2×10 mL), water (10 mL) and brine (5 mL). Organics were collected, dried over Na<sub>2</sub>SO<sub>4</sub> and concentrated to dryness *in vacuo* with rotary evaporator. Purification by flash chromatography (SiO<sub>2</sub>, DCM/MeOH 100:0 to 85:15) afforded desired multivalent compound **36** (43.0 mg, 2.00  $\mu$ mol, 74%) as a yellowish foam.

R<sub>f</sub> = 0.40, DCM/MeOH 92:8

<sup>1</sup>H NMR (600 MHz, CDCl<sub>3</sub>,  $\delta$  ppm): 9.70 (br s, 4H, NH), 7.85-7.84 (2xs, 20H, H<sub>triazole</sub>), 7.44-7.40 (m, 8H, CH<sub>b</sub>), 6.90-6.56 (m, 88H, CH<sub>b</sub>, CH<sub>c</sub>, CH<sub>c</sub>), 5.32 (d<sub>app</sub>, 20H, H<sub>4gal</sub>), 5.18-5.06 (m, 80H, H<sub>3glc</sub>, C<sub>q</sub>CH<sub>2</sub>O, H<sub>2gal</sub>), 4.95 (dd, <sup>3</sup>J<sub>2,3</sub> = 3.3 Hz, <sup>3</sup>J<sub>3,4</sub> = 7.1 Hz, 20H, H<sub>3gal</sub>), 4.88-4.83 (m, 20H, H<sub>2glc</sub>), 4.54-4.42 (m, 100H, CH<sub>2</sub>N, H<sub>1glc</sub>, H<sub>6aglc</sub>, H<sub>1gal</sub>), 4.13-4.05 (m, 60H,

$H_{6\text{bglc}}$ ,  $H_{6\text{agal}}$ ,  $H_{6\text{bgal}}$ , 3.88-3.45 (m, 348H,  $H_{5\text{gal}}$ ,  $H_{5\text{glc}}$ ,  $H_{4\text{glc}}$ ,  $\text{OCH}_2$ ,  $\text{SCH}_2\text{CONH}$ ), 2.81 (br s, 8H,  $\text{C}_q\text{CH}_2\text{S}$ ), 2.11-1.92 (m, 420H,  $\text{COCH}_3$ ).

$^{13}\text{C}$  NMR (150 MHz,  $\text{CDCl}_3$ ,  $\delta$  ppm): 170.3, 170.2, 170.1, 170.0, 169.7, 169.5, 169.0 (7xs,  $\text{COCH}_3$ ), 167.7 ( $\text{NHC=O}$ ), 155.2 ( $\text{C}_a$ ), 146.5 ( $\text{C}_d'$ ), 144.4 ( $\text{C}_d$ ), 144.3 ( $\text{C}_d$ ), 143.4 ( $\text{C}_{\text{triazole=CH}}$ ), 143.3 ( $\text{C}_{\text{triazole=CH}}$ ), 135.4 ( $\text{C}_a$ ), 124.5 ( $\text{C}_{\text{triazole=CH}}$ ), 124.1 ( $\text{C}_{\text{triazole=CH}}$ ), 121.8 ( $\text{C}_c$ ), 121.7 ( $\text{C}_c$ ), 121.0 ( $\text{C}_c'$ ), 120.9 ( $\text{C}_b'$ ), 115.2 ( $\text{C}_b$ ), 101.0 ( $\text{C}_{1\text{gal}}$ ), 100.5 ( $\text{C}_{1\text{glc}}$ ), 76.2 ( $\text{C}_{4\text{glc}}$ ), 72.7 ( $\text{C}_{3\text{glc}}$ ), 72.5 ( $\text{C}_{5\text{glc}}$ ), 71.5 ( $\text{C}_{2\text{glc}}$ ), 70.9 ( $\text{C}_{3\text{gal}}$ ), 70.5 ( $\text{C}_{5\text{gal}}$ ), 70.5, 70.4, 70.4, 70.3, 70.2, 70.1, 70.1, 69.3, 69.1, 69.0 ( $\text{OCH}_2$ ), 68.9 ( $\text{C}_{2\text{gal}}$ ), 68.9 ( $\text{OCH}_2$ ), 66.5 ( $\text{C}_{4\text{gal}}$ ), 62.2 ( $\text{OCH}_2\text{C=C}$ ), 61.9 ( $\text{C}_{6\text{glc}}$ ), 61.8 ( $\text{OCH}_2$ ), 60.8 ( $\text{C}_{6\text{gal}}$ ), 50.2 ( $\text{NCH}_2$ ), 50.1 ( $\text{NCH}_2$ ), 44.0 ( $\text{C}_q$ , not visible), 38.4 ( $\text{SCH}_2\text{CONH}$ ), 37.6 ( $\text{C}_q\text{CH}_2\text{S}$ ), 29.6, 20.8, 20.7, 20.6, 20.5, 20.5, 20.4 (7xs,  $\text{COCH}_3$ ).

$^{31}\text{P}$  NMR (122 MHz,  $\text{CDCl}_3$ ,  $\delta$  ppm): 9.8 ( $t_{\text{app}}$ , 12P).

$m/z$  (MALDI-TOF-MS/DHB matrix) for  $\text{C}_{897}\text{H}_{1196}\text{N}_{76}\text{O}_{468}\text{P}_{12}\text{S}_4 = 21031.3$ ; found 21098.1 (with successive losses of monomers and dendrons).

NMR diffusion studies ( $\text{CDCl}_3$ ):  $D = 1.17 \times 10^{-10} \text{ m}^2/\text{s}$ ;  $d_s = 7.0 \text{ nm}$ .

GPC measurements ( $\text{CHCl}_3/\text{Et}_3\text{N}$  (1%)):  $M_w = 25870$ ;  $M_n = 24610$ , PDI ( $M_w/M_n$ ) = 1.051.

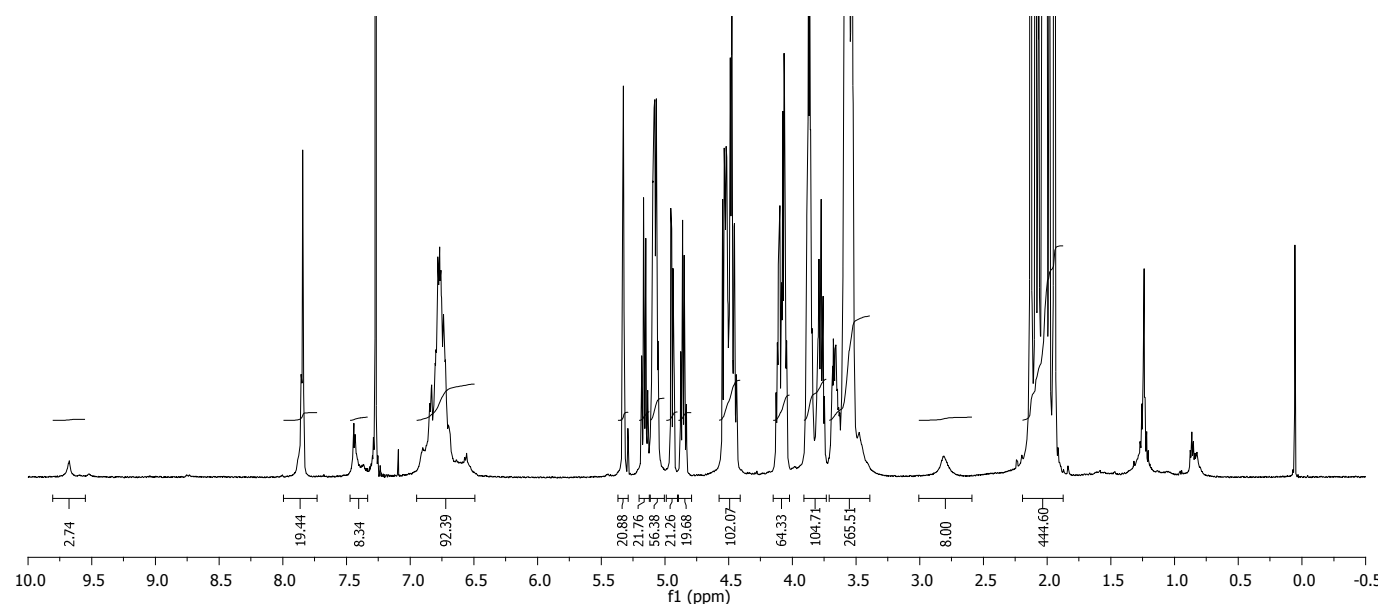

Figure S156.  $^1\text{H}$  NMR spectrum of compound **36** ( $\text{CDCl}_3$ , 600MHz)

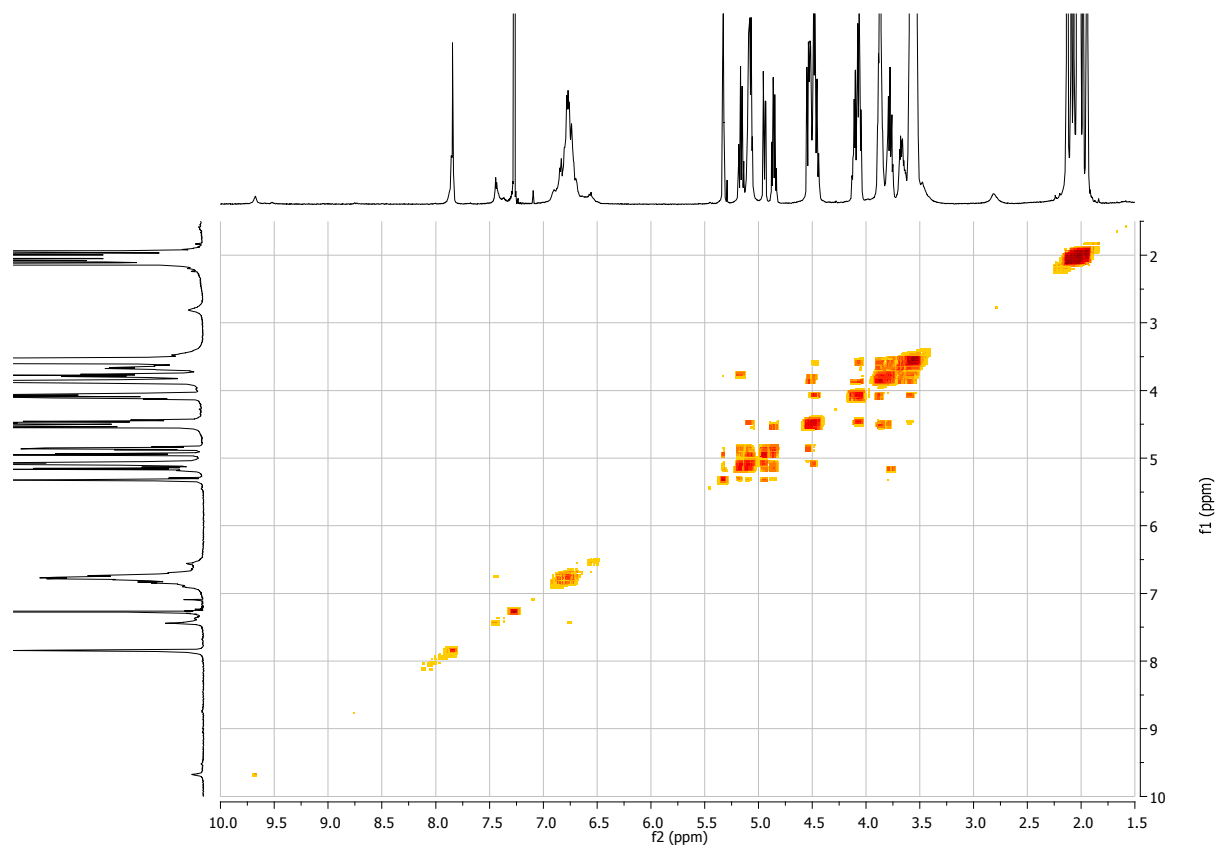

Figure S157. gCOSY spectrum of compound **36**

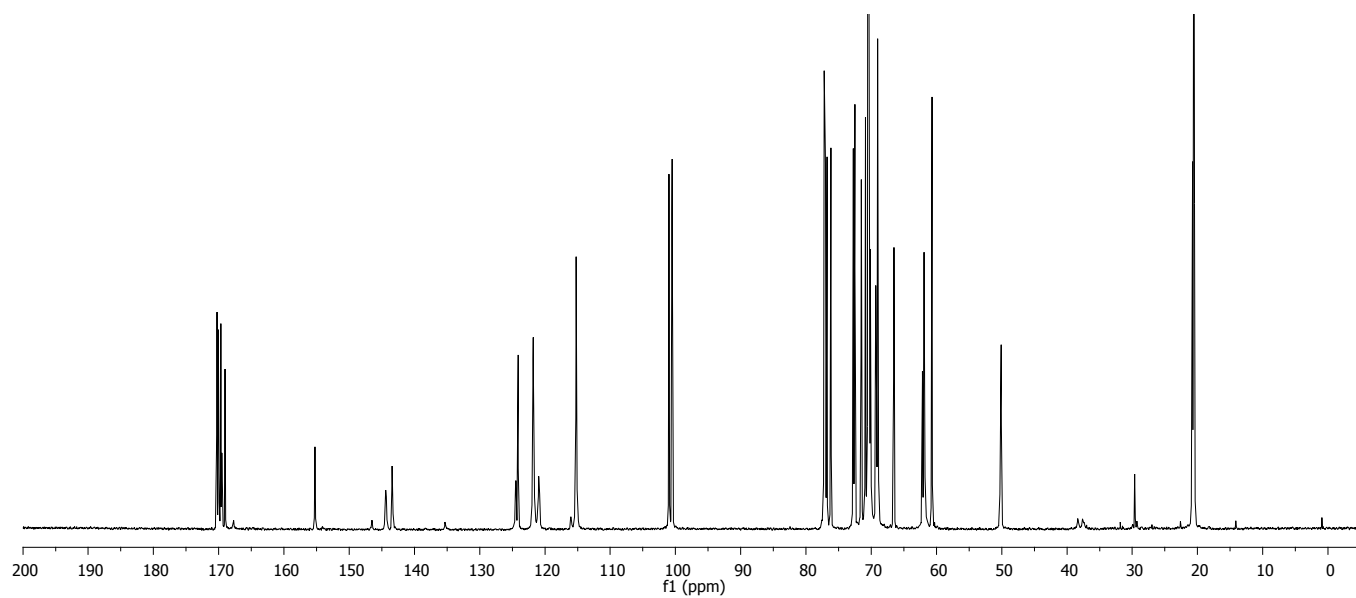

Figure S158.  $^{13}\text{C}$  NMR spectrum of compound **36** ( $\text{CDCl}_3$ , 150MHz)

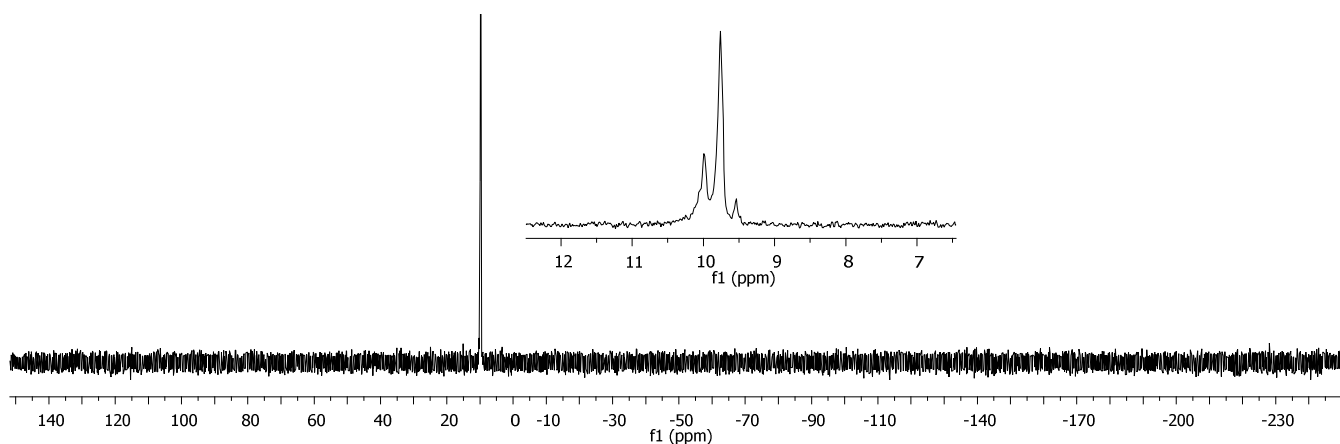

Figure S159.  $^{31}\text{P}$  NMR spectrum of compound **35** ( $\text{CDCl}_3$ , 122MHz)

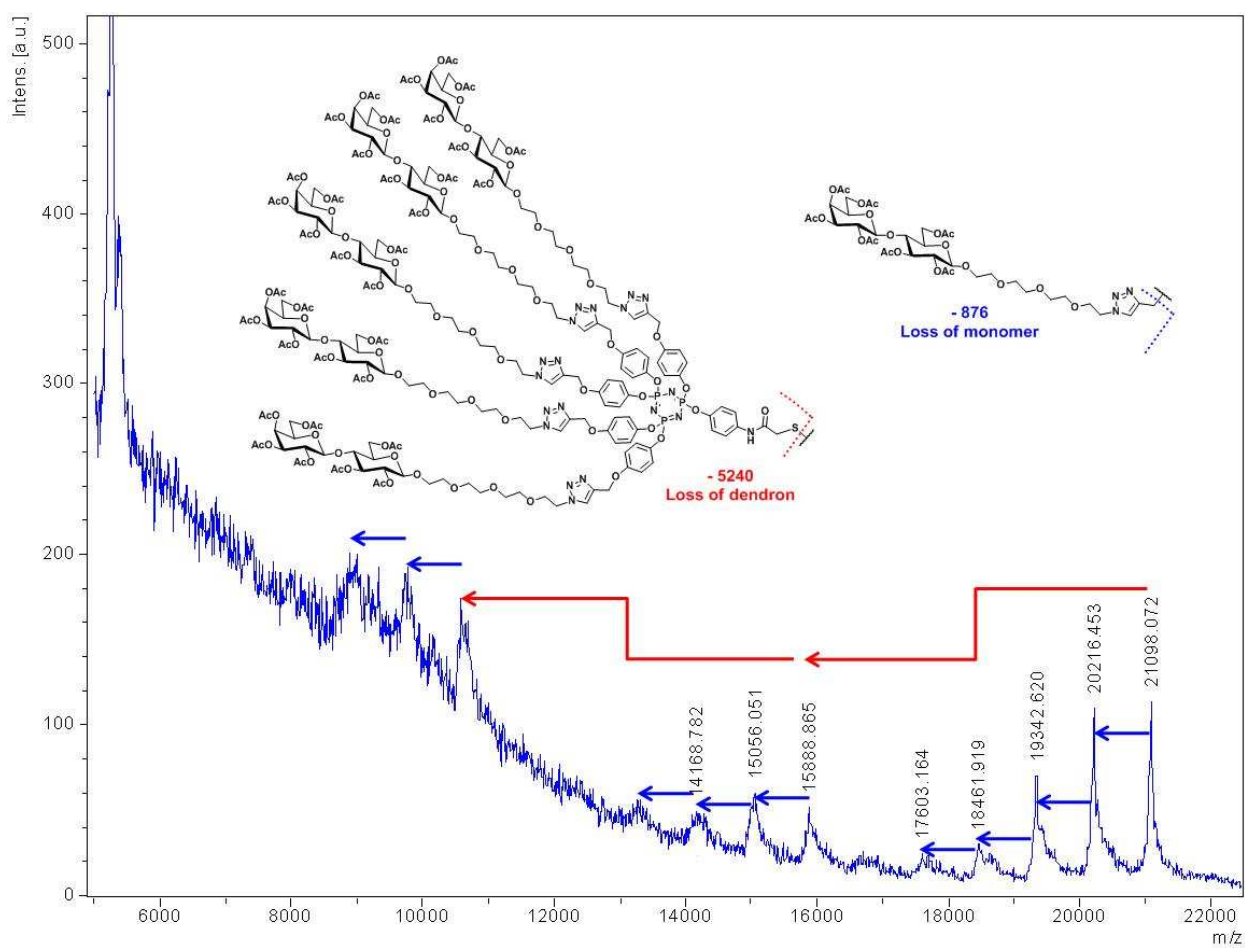

Figure S160. MALDI-TOF spectrum of compound **36** with successive fragmentations.

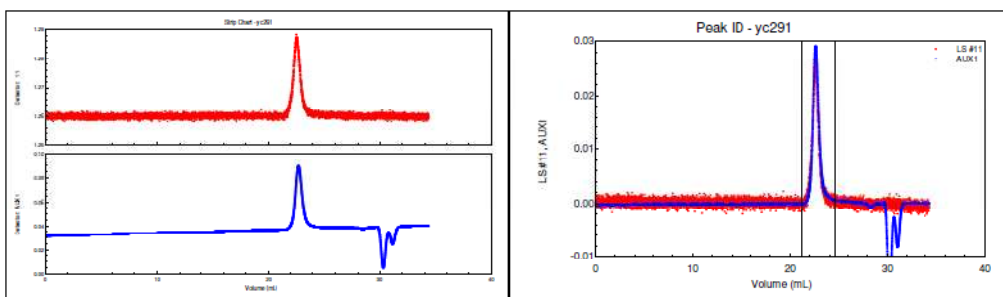

Polydispersity(Mw/Mn) : 1.051±0.159 (15%)  
 Polydispersity(Mz/Mn) : 1.176±0.383 (33%)

**Molar Mass Moments (g/mol)**  
**Mn** : 2.461e+04 (10%)  
**Mw** : 2.587e+04 (11%)  
**Mz** : 2.895e+04 (30%)

**Figure S161.** GPC trace (CHCl<sub>3</sub>/Et<sub>3</sub>N (1%)) for compound **36**

**Defectuous glycodendrimer **36a** (location of propargylic functions is arbitrary)**

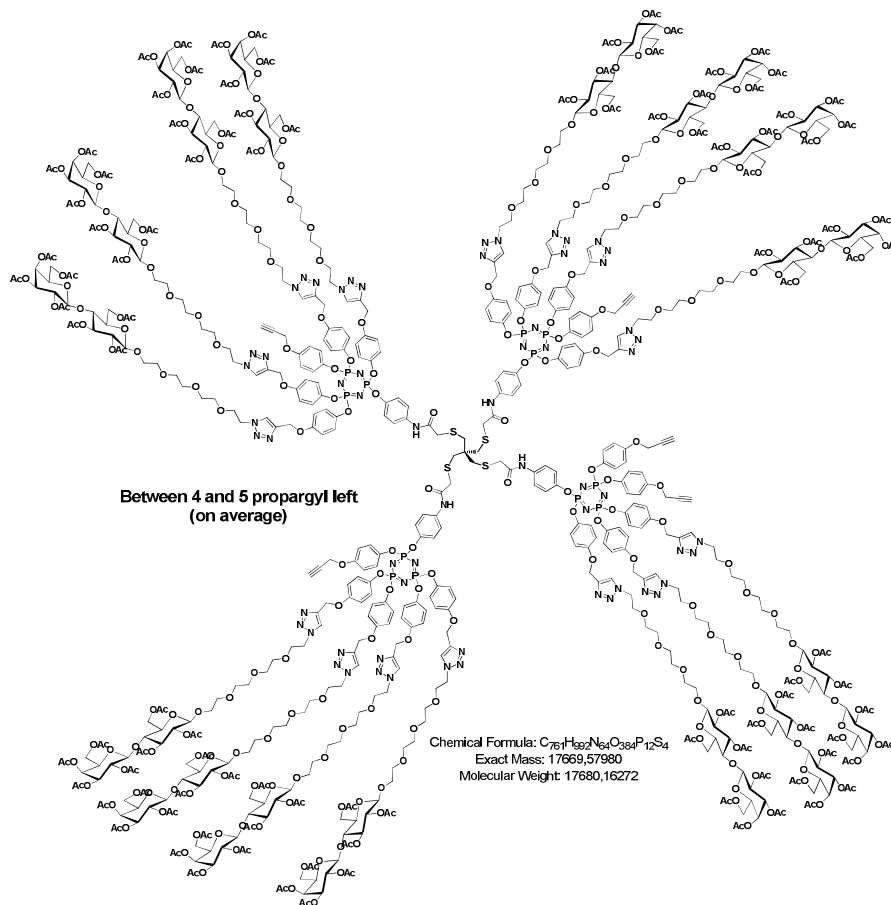

To a solution of icosapropargylated core **34** (10.2 mg, 2.39  $\mu\text{mol}$ , 1.0 eq.) in a 1:1 mixture of  $\text{H}_2\text{O}/\text{THF}_{\text{anh}}$  (4.0 mL) were added azido derivative **10** (32.0 mg, 0.038 mmol, 16.0 eq.),  $\text{CuSO}_4 \cdot 5\text{H}_2\text{O}$  (12.0 mg, 0.048 mmol, 20.0 eq.) and sodium ascorbate (9.5 mg, 0.048 mmol, 20.0 eq.). While stirring, the mixture was first heated at  $50^\circ\text{C}$  for 3 hours in a 20 mL vial and at room temperature for additional 18 hours. Ethyl acetate (15 mL) was added and the solution was poured into a separatory funnel containing ethyl acetate (10 mL), washed with saturated aqueous  $\text{NH}_4\text{Cl}$  ( $2 \times 10$  mL), water (10 mL) and brine (5 mL). Organics were collected, dried over  $\text{Na}_2\text{SO}_4$  and concentrated to dryness *in vacuo* with rotary evaporator. Purification by flash chromatography ( $\text{SiO}_2$ ,  $\text{DCM}/\text{MeOH}$  100:0 to 85:15) afforded desired mixture of defectuous multivalent compounds containing 4-5 propargylic functions on average **36a** (36.0 mg, 2.04  $\mu\text{mol}$ , **85%**) as an off-white foam.

$R_f = 0.40$ ,  $\text{DCM}/\text{MeOH}$  92:8.

$^1\text{H NMR}$  (600 MHz,  $\text{CDCl}_3$ ,  $\delta$  ppm): 9.70 (br s, 4H, NH), 7.85-7.84 (2xs, 16H,  $H_{\text{triazole}}$ ), 7.44-7.40 (m, 8H,  $\text{CH}_b$ ), 6.90-6.56 (m, 88H,  $\text{CH}_b$ ,  $\text{CH}_c$ ,  $\text{CH}_c$ ), 5.32 ( $d_{\text{app}}$ , 16H,  $H_{4\text{gal}}$ ), 5.18-5.06 (m, 64H,  $H_{3\text{glc}}$ ,  $\text{C}_q\text{CH}_2\text{O}$ ,  $H_{2\text{gal}}$ ), 4.95 (dd,  $^3J_{2,3} = 3.3$  Hz,  $^3J_{3,4} = 7.1$  Hz, 16H,  $H_{3\text{gal}}$ ), 4.88-4.83 (m, 16H,  $H_{2\text{glc}}$ ), **4.65 (m, ~8H,  $\text{CH}_2\text{OC}\equiv\text{CH}$ )**, 4.54-4.42 (m, 80H,  $\text{CH}_2\text{N}$ ,  $H_{1\text{glc}}$ ,  $H_{6\text{glc}}$ ,  $H_{1\text{gal}}$ ), 4.13-4.05 (m, 48H,  $H_{6\text{glc}}$ ,  $H_{6\text{gal}}$ ,  $H_{6\text{bgal}}$ ), 3.88-3.45 (m, 280H,  $H_{5\text{gal}}$ ,  $H_{5\text{glc}}$ ,  $H_{4\text{glc}}$ ,  $\text{OCH}_2$ ,  $\text{SCH}_2\text{CONH}$ ), 2.81 (br s, 8H,  $\text{C}_q\text{CH}_2\text{S}$ ), **2.53 (br s, ~4H,  $\text{CH}_2\text{OC}\equiv\text{CH}$ )**, 2.11-1.92 (m, 336H,  $\text{COCH}_3$ ).



<sup>13</sup>C NMR (150 MHz, CDCl<sub>3</sub>, δ ppm): 170.3, 170.2, 170.1, 170.0, 169.7, 169.5, 169.0 (7xs, COCH<sub>3</sub>), 167.7 (NHC=O), 155.3 (C<sub>a</sub>), 154.4 (C<sub>a</sub>), 146.5 (C<sub>d</sub>'), 144.5 (C<sub>d</sub>), 144.3 (C<sub>d</sub>), 143.4 (C<sub>triazole=CH</sub>), 143.3 (C<sub>triazole=CH</sub>), 135.4 (C<sub>a</sub>'), 124.5 (C<sub>triazole=CH</sub>), 124.5 (C<sub>triazole=CH</sub>), 124.1 (C<sub>triazole=CH</sub>), 121.8 (C<sub>c</sub>), 121.7 (C<sub>c</sub>), 121.0 (C<sub>c</sub>), 120.9 (C<sub>b</sub>'), 115.5 (C<sub>b</sub>), 115.2 (C<sub>b</sub>), 101.0 (C<sub>1gal</sub>), 100.5 (C<sub>1glc</sub>), **78.7 (C≡CH)**, **78.5 (C≡CH)**, 76.2 (C<sub>4glc</sub>), **76.0 (C≡CH)**, **75.8 (C≡CH)**, 72.8 (C<sub>3glc</sub>), 72.5 (C<sub>5glc</sub>), 71.6 (C<sub>2glc</sub>), 70.9 (C<sub>3gal</sub>), 70.5 (C<sub>5gal</sub>), 70.5, 70.4, 70.4, 70.3, 70.2, 70.1, 70.1, 69.3, 69.1, 69.0 (OCH<sub>2</sub>), 68.9 (C<sub>2gal</sub>), 68.9 (OCH<sub>2</sub>), 66.5 (C<sub>4gal</sub>), 62.2 (OCH<sub>2</sub>C=C), 61.9 (C<sub>6glc</sub>), 61.8 (OCH<sub>2</sub>), 60.7 (C<sub>6gal</sub>), **56.1 (OCH<sub>2</sub>C≡CH)**, 50.1 (NCH<sub>2</sub>), 50.1 (NCH<sub>2</sub>), 44.2 (C<sub>q</sub>), 38.4 (SCH<sub>2</sub>CONH), 37.4 (C<sub>q</sub>CH<sub>2</sub>S), 29.6, 20.8, 20.7, 20.6, 20.5, 20.5, 20.4 (7xs, COCH<sub>3</sub>).

<sup>31</sup>P NMR (122 MHz, CDCl<sub>3</sub>, δ ppm): 9.8 (t<sub>app</sub>, 12P).

*m/z* (MALDI-TOF-MS/DHB matrix) : From 21005.2 (click completion) to 7574 with signals corresponding to successive losses of monomers (~876 MW).

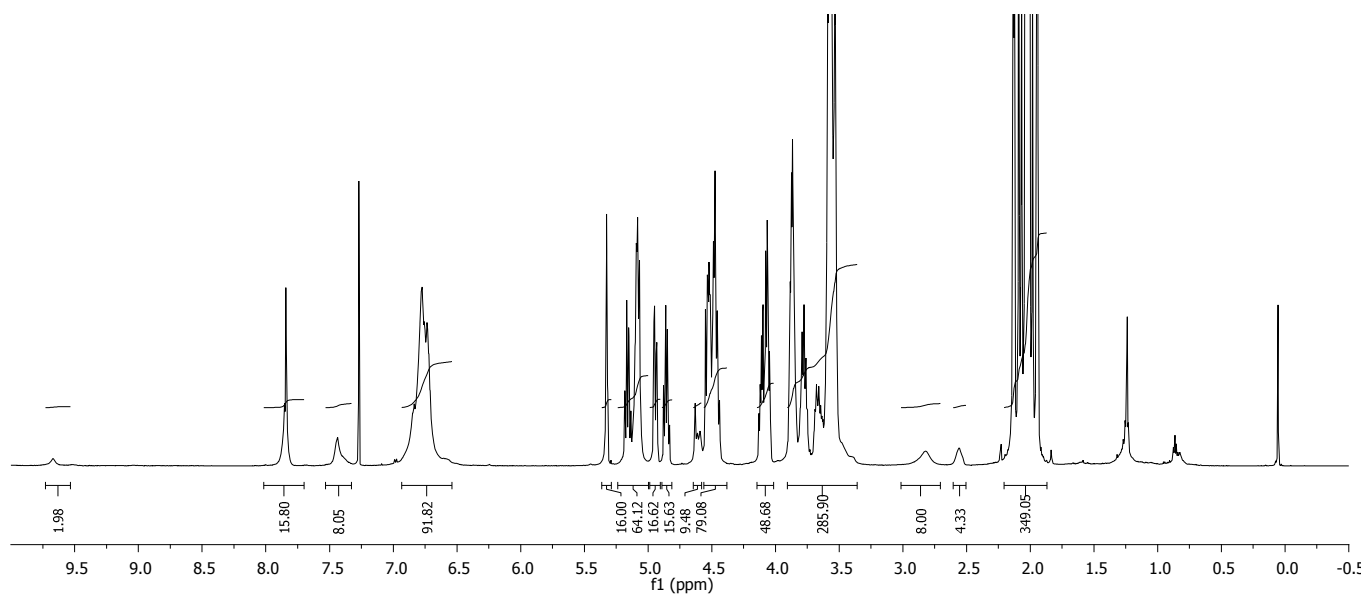

**Figure S162.** <sup>1</sup>H NMR spectrum of compound **36a** (CDCl<sub>3</sub>, 600MHz)

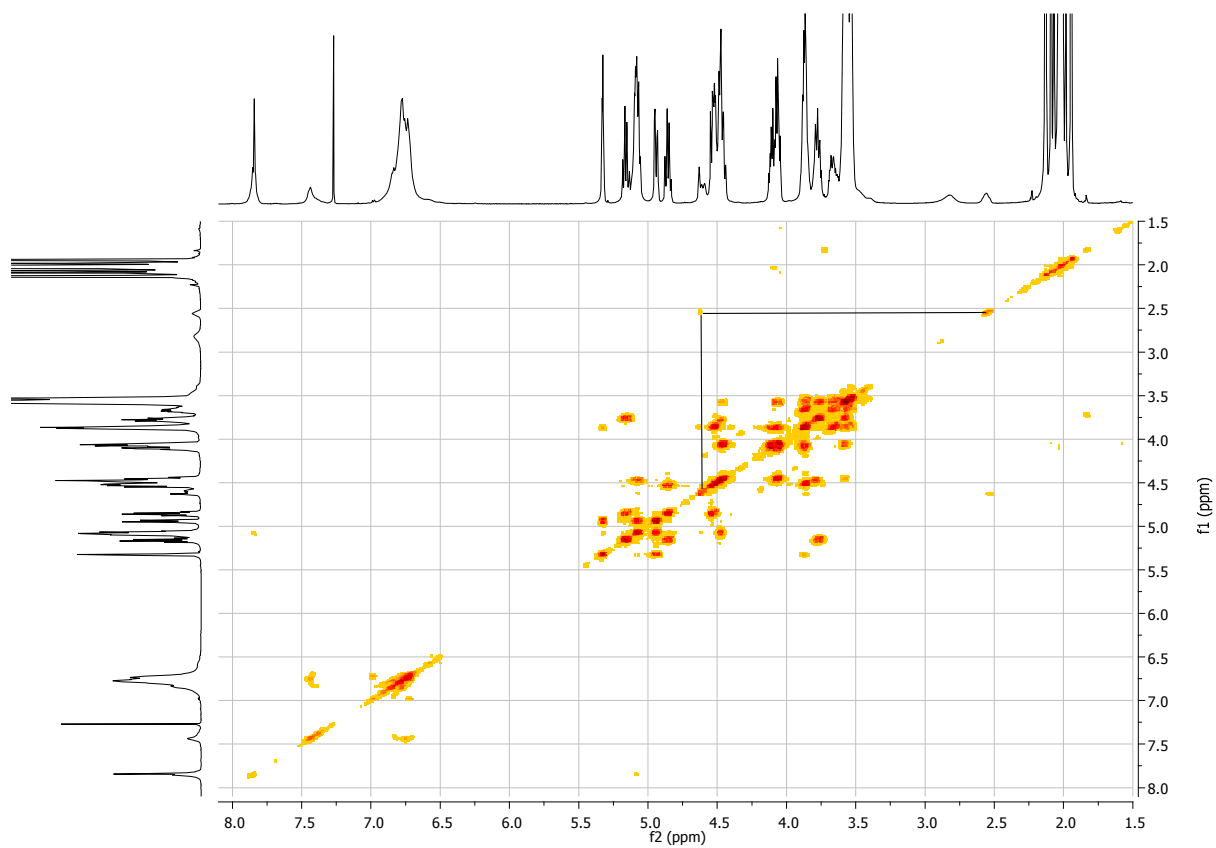

Figure S163. gCOSY spectrum of compound **36a**

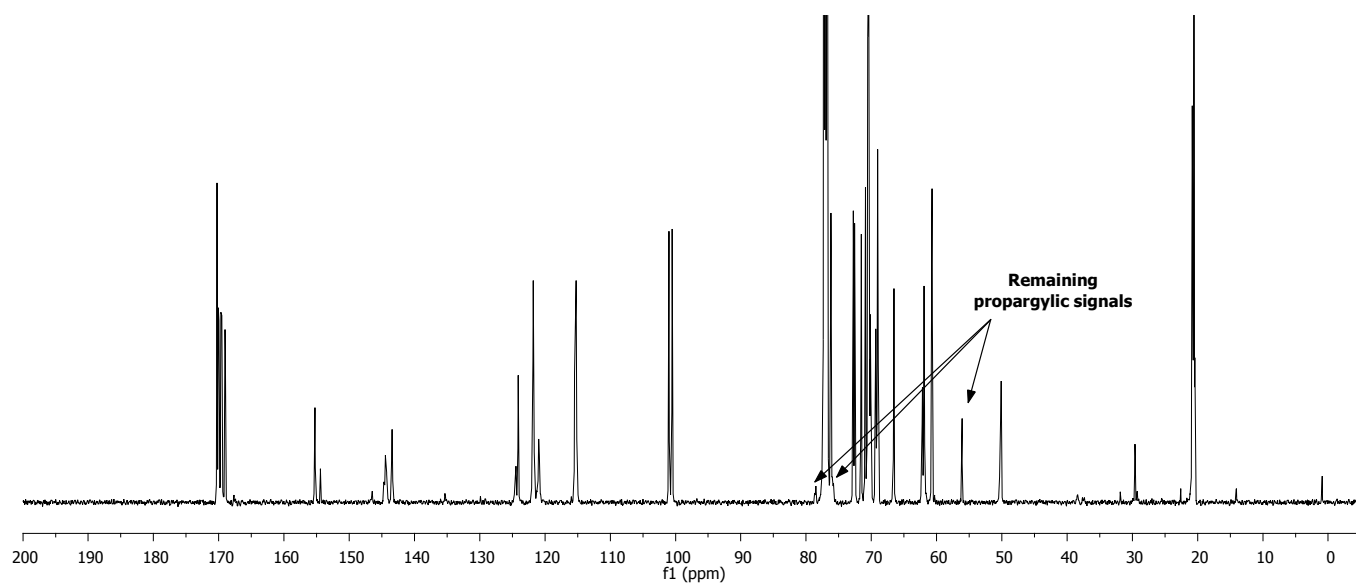

Figure S164.  $^{13}\text{C}$  NMR spectrum of compound **36a** ( $\text{CDCl}_3$ , 150MHz)

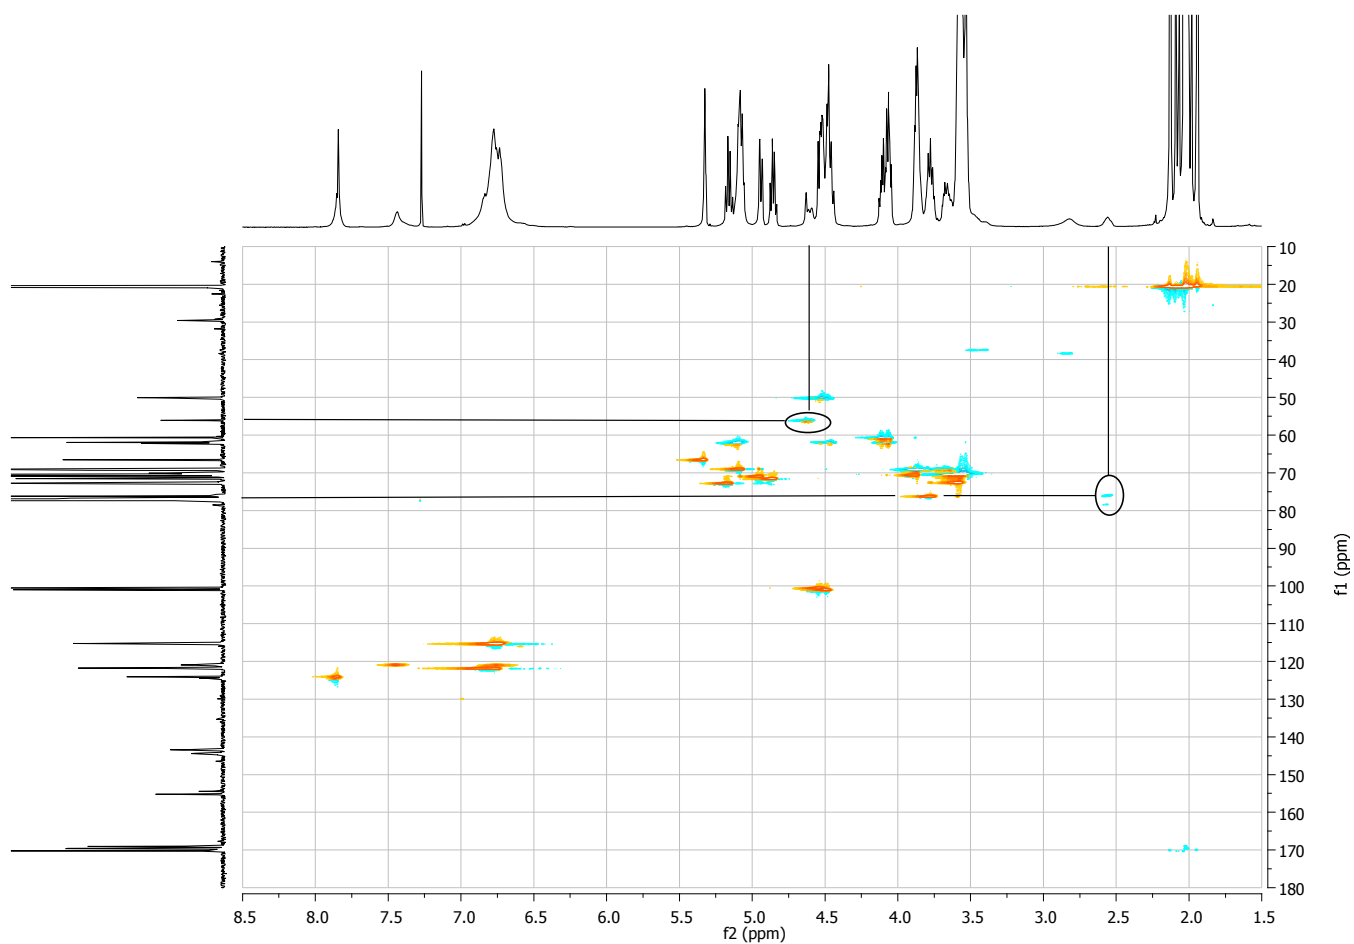

Figure S165. HSQC spectrum of compound **36a**

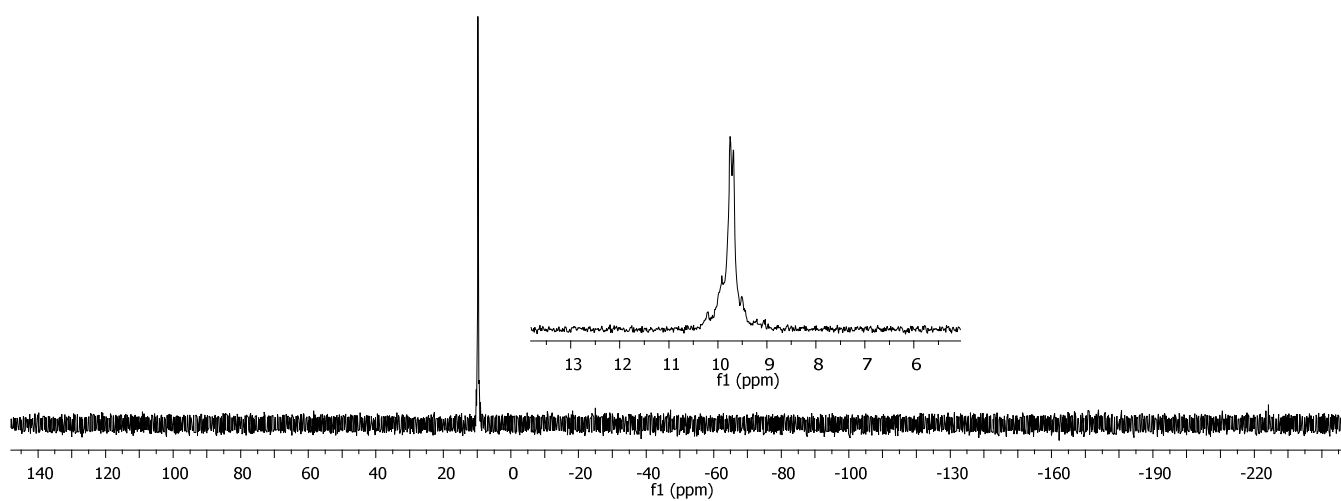

Figure S166.  $^{31}\text{P}$  NMR spectrum of compound **36a** ( $\text{CDCl}_3$ , 122MHz)

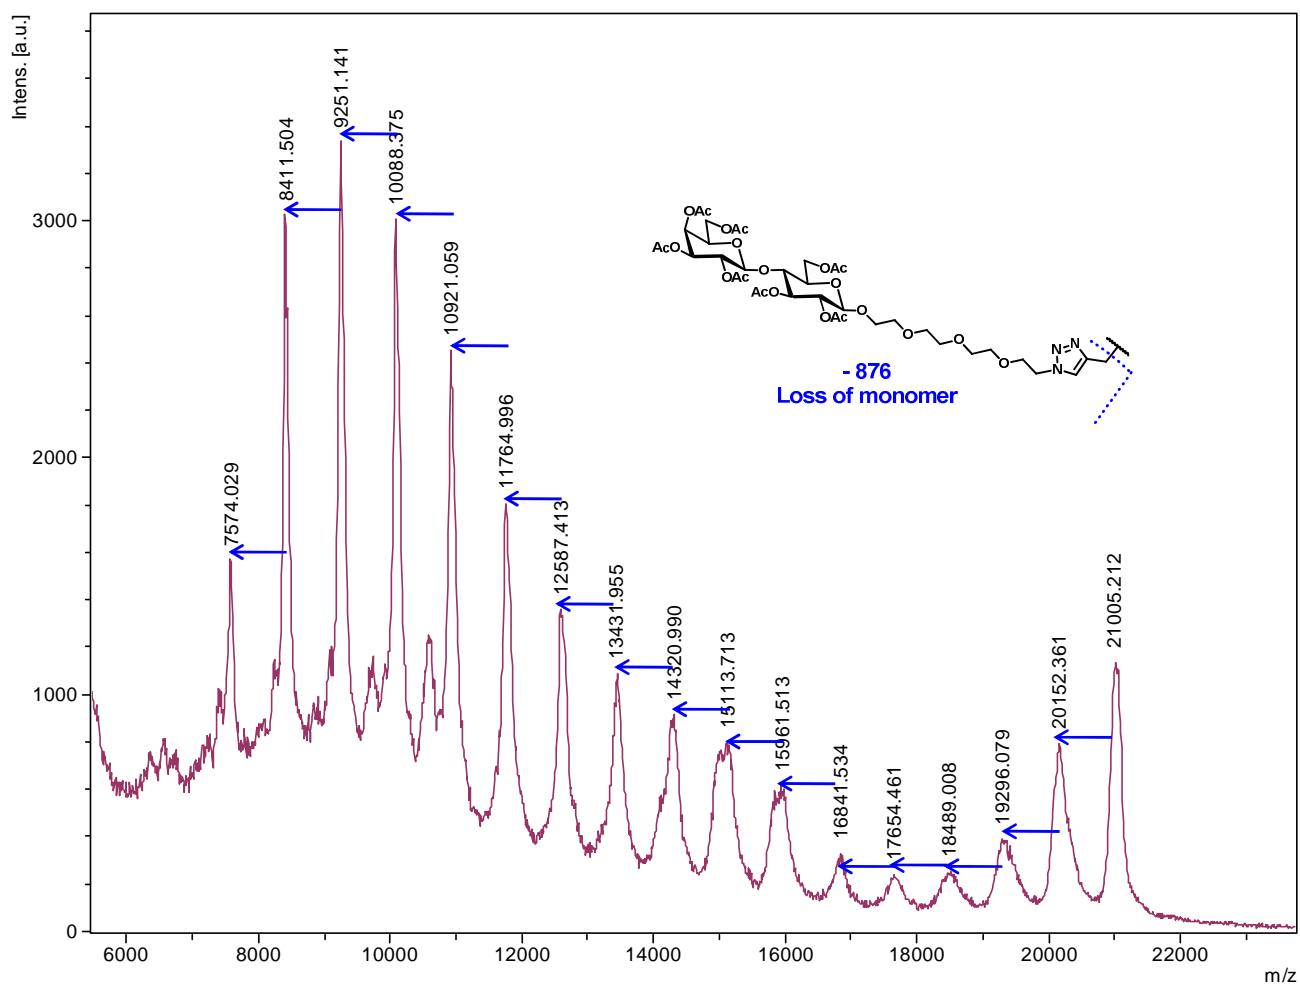

Figure S167. MALDI-TOF (DHB matrix) spectrum of compound 36a with successive losses of monomers.

## Protected tricontavalent glycodendrimer **37**

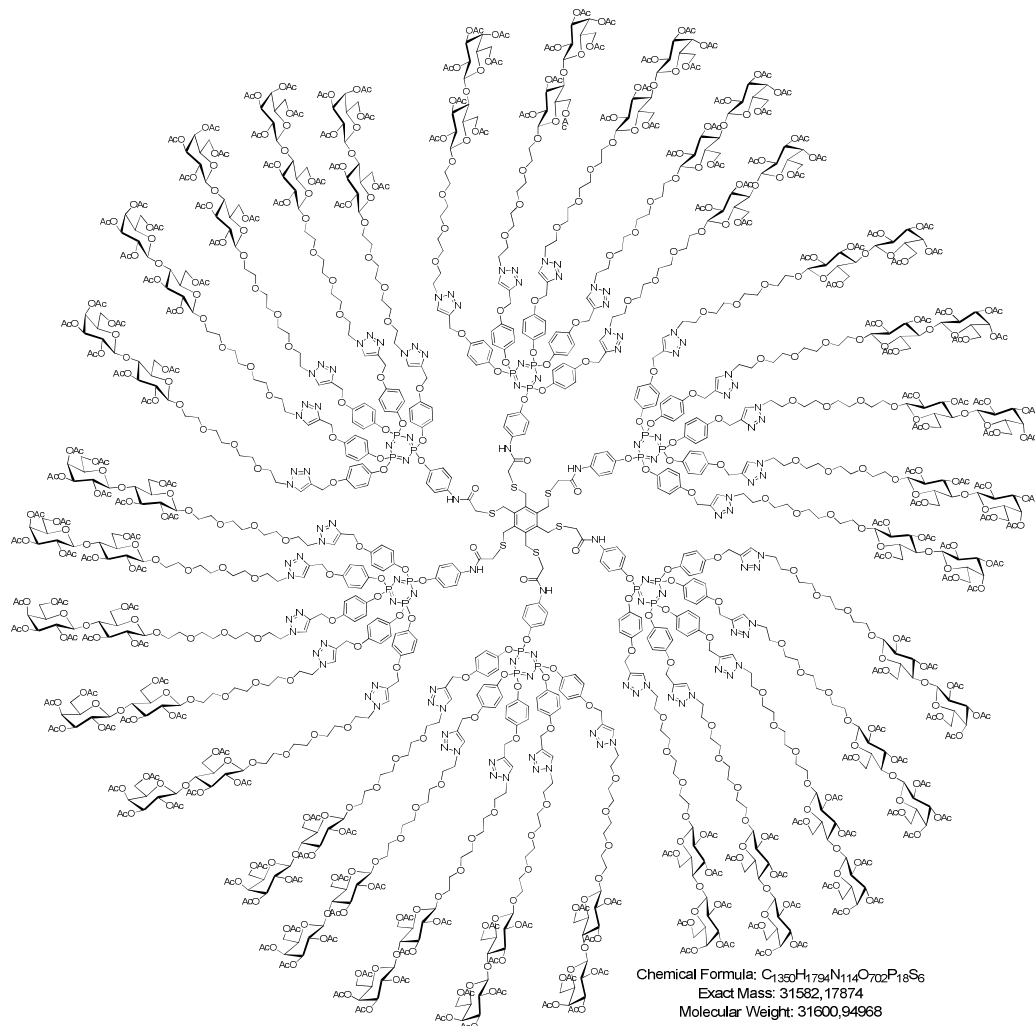

To a solution of tricontapropargylated core **35** (11.0 mg, 1.70  $\mu\text{mol}$ , 1.0 eq.) in a 1:1 mixture of  $\text{H}_2\text{O}/\text{THF}_{\text{anh}}$  (4.0 mL) were added azido derivative **10** (71.2 mg, 0.085 mmol, 50.0 eq.),  $\text{CuSO}_4 \cdot 5\text{H}_2\text{O}$  (17.0 mg, 0.068 mmol, 40.0 eq.) and sodium ascorbate (13.5 mg, 0.068 mmol, 40.0 eq.). While stirring, the mixture was first heated at 50°C for 3 hours in a 20 mL vial and at room temperature for additional 18 hours. Noteworthy is the fact that 6mg of  $\text{CuSO}_4 \cdot 5\text{H}_2\text{O}$  and 4mg of sodium ascorbate were added to the solution after the 3 hours of heating. Ethyl acetate (15 mL) was added and the solution was poured into a separatory funnel containing ethyl acetate (10 mL), washed with saturated aqueous  $\text{NH}_4\text{Cl}$  (2x10 mL), water (10 mL) and brine (5 mL). Organics were collected, dried over  $\text{Na}_2\text{SO}_4$  and concentrated to dryness *in vacuo* with rotary evaporator. Purification by flash chromatography ( $\text{SiO}_2$ , DCM/MeOH 100:0 to 85:15) afforded desired multivalent compound **37** (40.0 mg, 1.27  $\mu\text{mol}$ , **74%**) as a yellowish foam.

$R_f = 0.27$ , DCM/MeOH 94:6

$^1\text{H NMR}$  (600 MHz,  $\text{CDCl}_3$ ,  $\delta$  ppm): 9.82 (br s, 6H, NH), 7.85-7.84 (br s, 30H,  $H_{\text{triazole}}$ ), 7.46-7.40 (m, 12H,  $\text{CH}_b$ ), 6.95-6.50 (m, 132H,  $\text{CH}_b$ ,  $\text{CH}_c$ ,  $\text{CH}_c'$ ), 5.33 ( $d_{\text{app}}$ , 30H,  $H_{4\text{gal}}$ ), 5.19-5.07 (m, 120H,  $H_{3\text{glc}}$ ,  $\text{C}_q\text{CH}_2\text{O}$ ,  $H_{2\text{gal}}$ ), 4.94 (dd,  $^3J_{2,3} = 3.3$

Hz,  $^3J_{3,4} = 7.1$  Hz, 30H,  $H_{3gal}$ ), 4.88-4.83 (m, 30H,  $H_{2glc}$ ), 4.55-4.46 (m, 150H,  $CH_2N$ ,  $H_{1glc}$ ,  $H_{6aglc}$ ,  $H_{1gal}$ ), 4.20 (br s, 12H,  $C_{core}CH_2S$ ), 4.13-4.05 (m, 90H,  $H_{6bglc}$ ,  $H_{6agal}$ ,  $H_{6bgal}$ ), 3.89-3.40 (m, 522H,  $H_{5gal}$ ,  $H_{5glc}$ ,  $H_{4glc}$ ,  $OCH_2$ ,  $SCH_2CONH$ ), 2.11-1.92 (m, 630H,  $COCH_3$ ).

$^{13}C$  NMR (150 MHz,  $CDCl_3$ ,  $\delta$  ppm): 170.3, 170.2, 170.1, 170.0, 169.7, 169.5, 169.0 (7xs,  $COCH_3$ ), 169.3 ( $NHC=O$ ), 155.2 ( $C_a$ ), 154.5 ( $C_a$ ), 146.5 ( $C_d'$ ) (not visible), 144.4 ( $C_d$ ), 144.3 ( $C_d$ ), 143.4 ( $C_{triazole=CH}$ ), 143.3 ( $C_{triazole=CH}$ ), 136.2 ( $C_q$  core), 135.4 ( $C_a'$ ), 124.5 ( $C_{triazole=CH}$ ), 124.1 ( $C_{triazole=CH}$ ), 121.8 ( $C_c$ ), 121.7 ( $C_c$ ), 121.0 ( $C_c'$ ), 120.9 ( $C_b'$ ), 115.2 ( $C_b$ ), 101.0 ( $C_{1gal}$ ), 100.5 ( $C_{1glc}$ ), 76.2 ( $C_{4glc}$ ), 72.7 ( $C_{3glc}$ ), 72.5 ( $C_{5glc}$ ), 71.5 ( $C_{2glc}$ ), 70.9 ( $C_{3gal}$ ), 70.5 ( $C_{5gal}$ ), 70.5, 70.4, 70.4, 70.3, 70.2, 70.1, 70.1, 69.3, 69.1, 69.0 ( $OCH_2$ ), 68.9 ( $C_{2gal}$ ), 68.9 ( $OCH_2$ ), 66.5 ( $C_{4gal}$ ), 62.1 ( $OCH_2=C$ ), 61.9 ( $C_{6glc}$ ), 61.8 ( $OCH_2$ ), 60.7 ( $C_{6gal}$ ), 50.2 ( $NCH_2$ ), 50.1 ( $NCH_2$ ), 37.8 ( $SCH_2CONH$ ), 31.2 ( $C_{core}CH_2S$ ) (not visible), 29.6, 20.8, 20.7, 20.6, 20.5, 20.5, 20.4 (7xs,  $COCH_3$ ).

$^{31}P$  NMR (122 MHz,  $CDCl_3$ ,  $\delta$  ppm): 9.8 (m, 18P).

$m/z$  (MALDI-TOF-MS/DHB matrix) for  $C_{1350}H_{1794}N_{114}O_{702}P_{18}S_6 = 31600$ ; found 31478 (with signals corresponding to successive losses of monomer(s)).

NMR diffusion studies ( $CDCl_3$ ):  $D = 1.34 \times 10^{-10}$  m<sup>2</sup>/s;  $d_s = 6.2$  nm.

GPC measurements ( $CHCl_3/Et_3N$  (1%)):  $M_w = 42710$ ;  $M_n = 39580$ , PDI ( $M_w/M_n$ ) = 1.079.

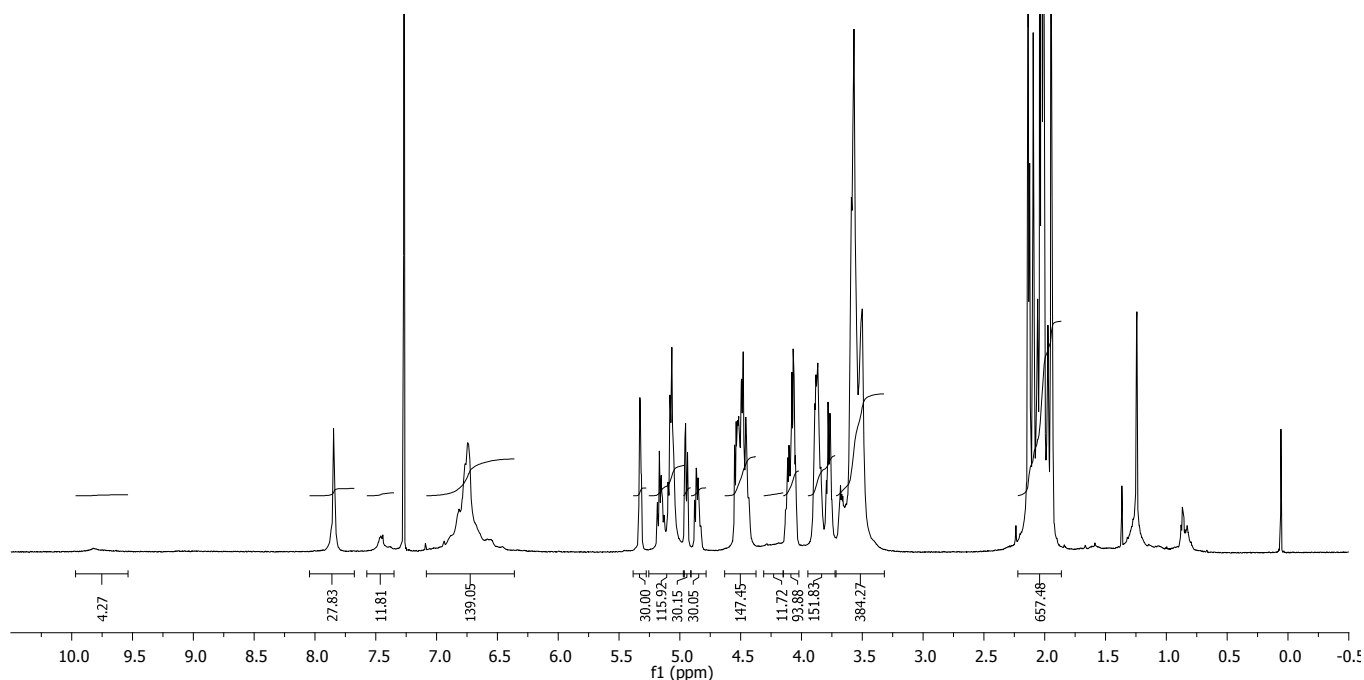

Figure S168.  $^1H$  NMR spectrum of compound **37** ( $CDCl_3$ , 600MHz)

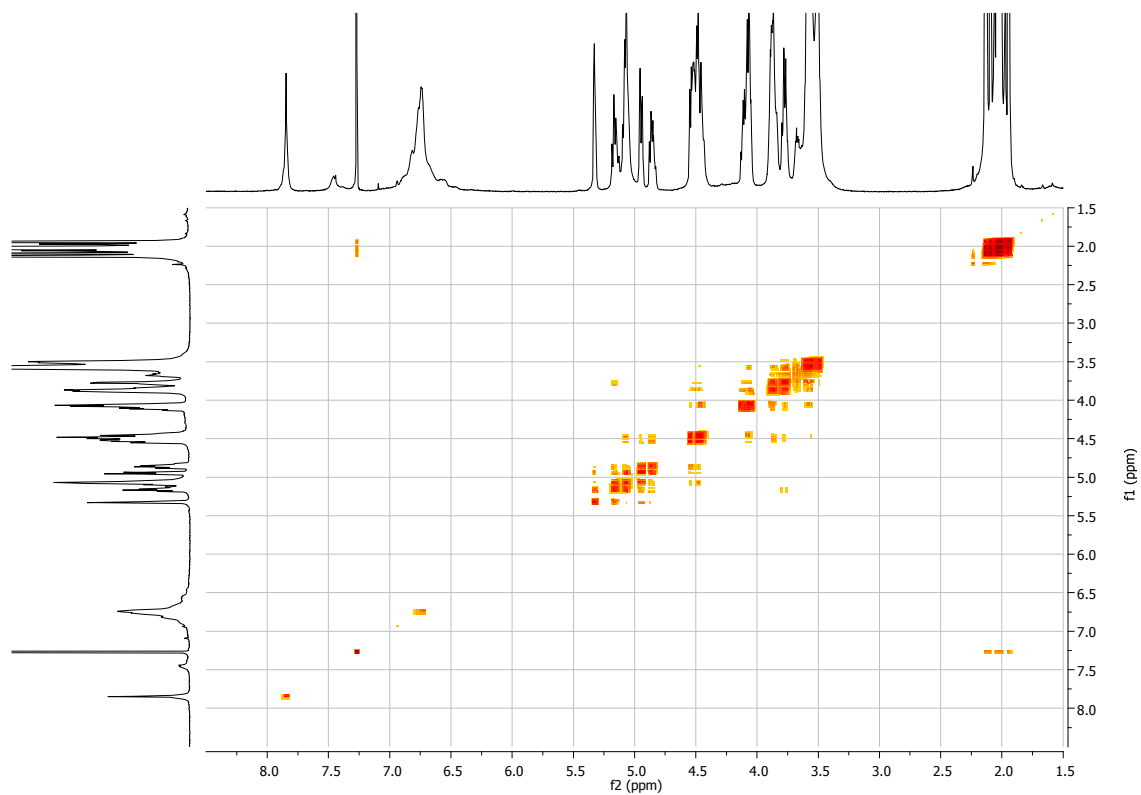

Figure S169. gCOSY spectrum of compound **37**

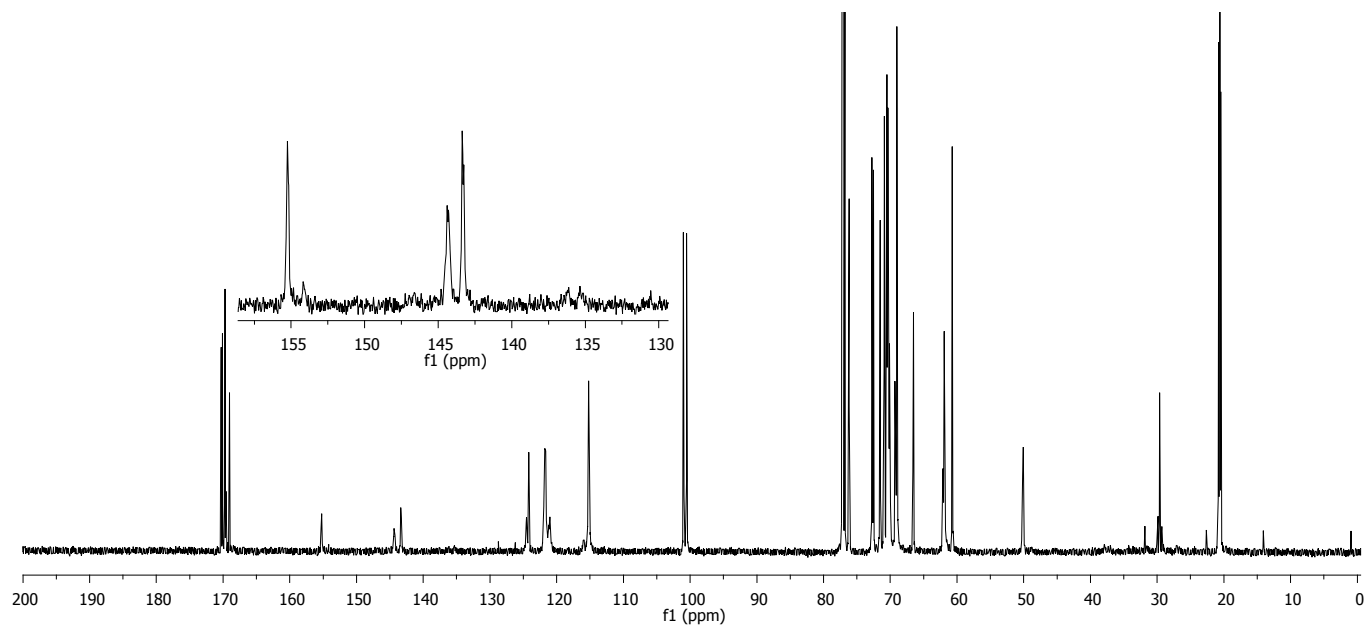

Figure S170.  $^{13}\text{C}$  NMR spectrum of compound **37** ( $\text{CDCl}_3$ , 150MHz) (*insert*: zoom on aromatic section)

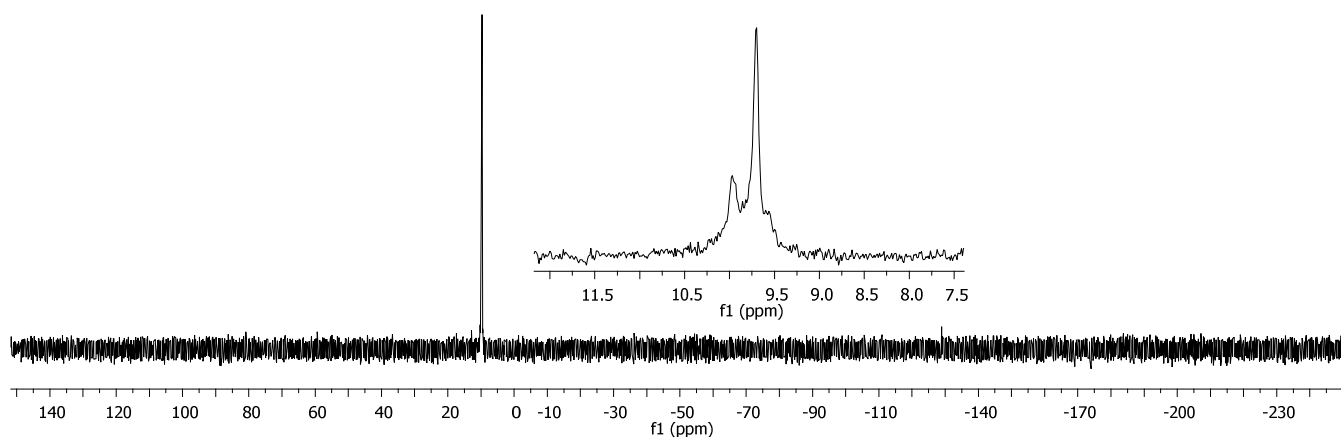

**Figure S171.**  $^{31}\text{P}$  NMR spectrum of compound **37** ( $\text{CDCl}_3$ , 122MHz)

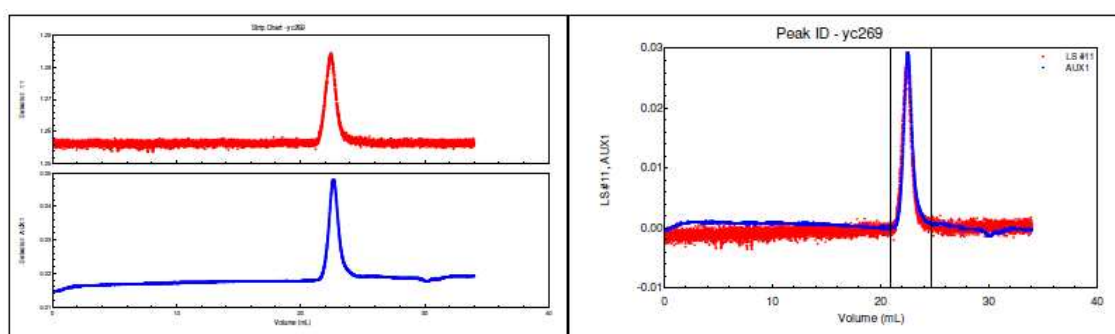

Polydispersity(Mw/Mn) : 1.079±0.170 (16%)  
 Polydispersity(Mz/Mn) : 1.193±0.320 (27%)

Molar Mass Moments (g/mol)  
 Mn : 3.958e+04 (11%)  
 Mw : 4.271e+04 (10%)  
 Mz : 4.720e+04 (24%)

**Figure S172.** GPC trace ( $\text{CHCl}_3/\text{Et}_3\text{N}$  (1%)) for compound **37**



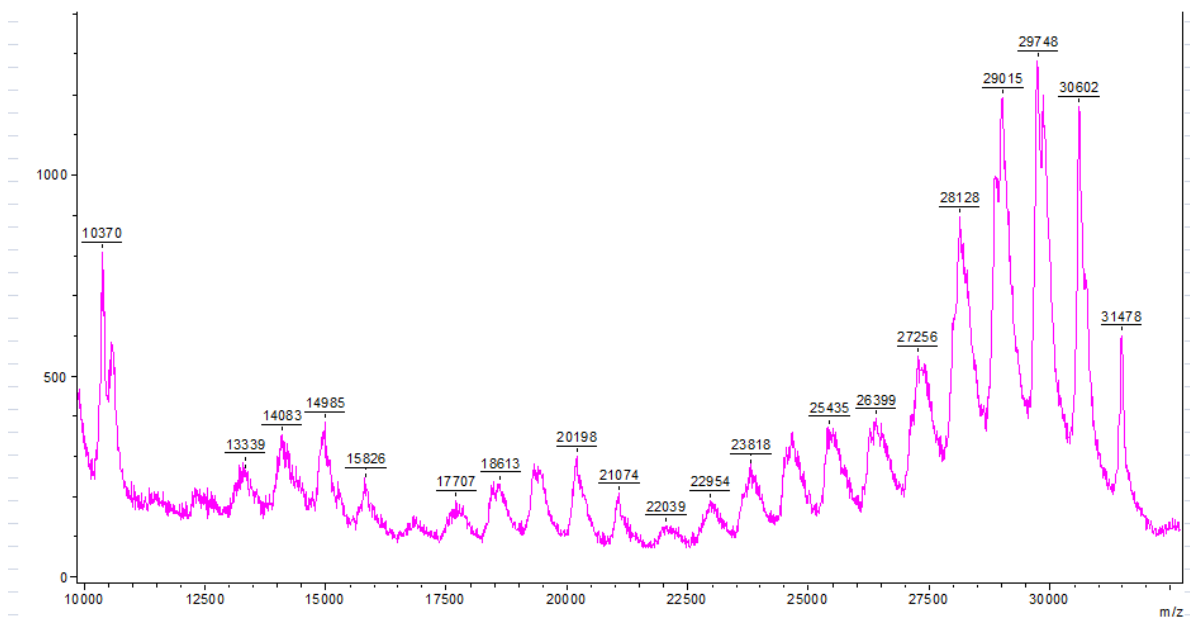

**Figure S173.** MALDI-TOF (DHB matrix) spectrum of compound **37** with successive losses of monomers

## Hydroxylated tricontavalent glycodendrimer **38**

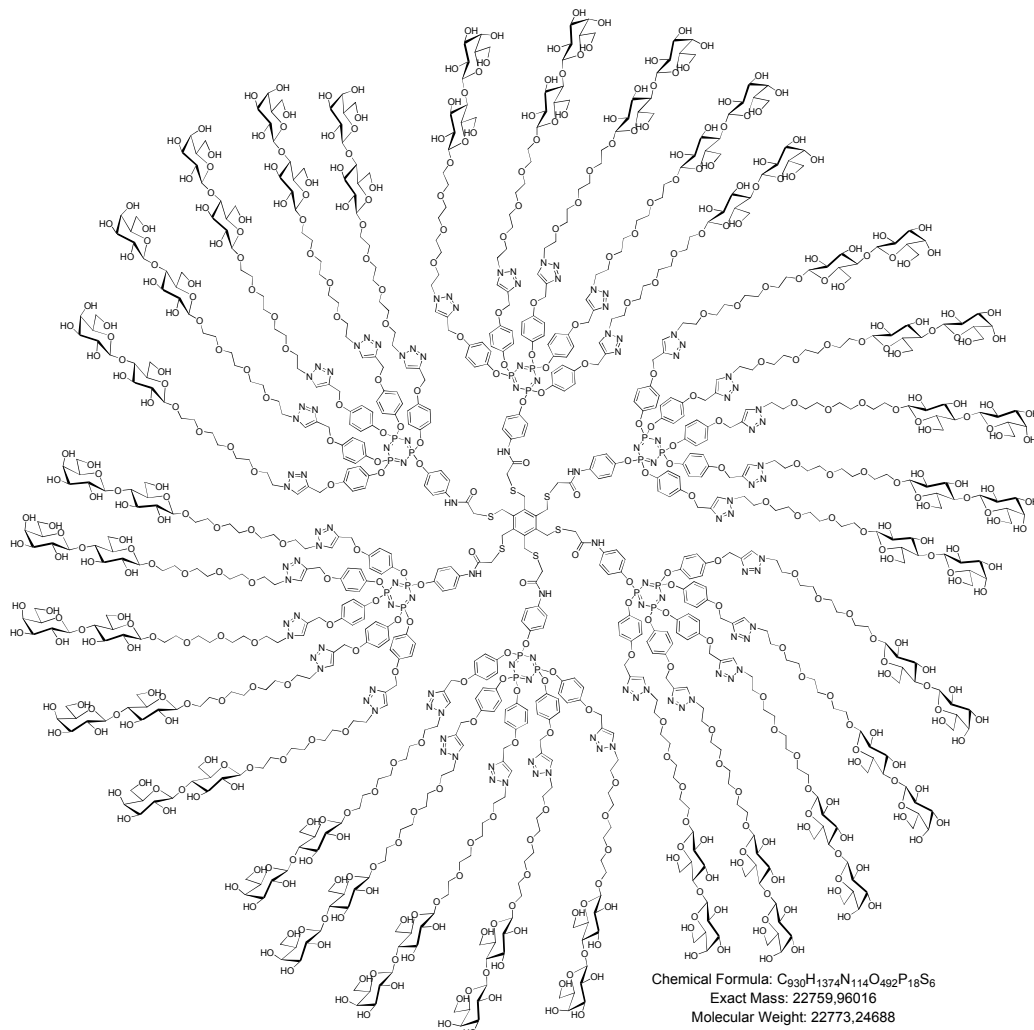

Acetylated compound **37** (34.0 mg, 1.08  $\mu\text{mol}$ ) was dissolved in a dry mixture of MeOH/DCM (5 mL, 4:1) and a solution of sodium methoxide (1M in MeOH, 5  $\mu\text{L}$  every 20 minutes until precipitation) was added. An additional 100  $\mu\text{L}$  was then injected and the heterogeneous reaction mixture was stirred at room temperature for 18 hours. The solvent was then removed with a Pasteur pipette and another dry mixture of MeOH/DCM (4 mL, 3:1) is added to the residual oil. A vigorous agitation is maintained for an additional 15 min. period. After removal of the solvents with a Pasteur pipette, 2 mL of dry MeOH were added to the viscous residue under agitation. After 15 min., the MeOH was removed and the residue was dissolved in 3 mL of  $\text{H}_2\text{O}$ , and the pH was adjusted to 7 with addition of ion-exchange resin (Amberlite IR 120  $\text{H}^+$ ). After filtration, the solvent was removed under *vacuum* with rotary evaporator, lyophilized to yield the fully deprotected tricontavalent derivative **38** as an off-white solid (20.0 mg, 0.88  $\mu\text{mol}$ , **83%**).

$^1\text{H NMR}$  (600 MHz,  $\text{D}_2\text{O}$ ,  $\delta$  ppm): 7.99 (m, 30H,  $H_{\text{triazole}}$ ), 7.28 (br s, 12H,  $\text{CH}_b$ ), 6.99 (br s, 132H,  $\text{CH}_b$ ,  $\text{CH}_c$ ,  $\text{CH}_c$ ), 5.10-4.90 (br s, 60H,  $\text{C}_q\text{-triazole-CH}_2\text{O}$ ), 4.58-4.32 (m, 132H,  $N_{\text{triazole-CH}_2\text{CH}_2}$ ,  $\text{C}_{\text{core-CH}_2\text{S}}$ ,  $H_{1\text{glc}}$ ,  $H_{1\text{gal}}$ ), 3.97-3.25 (m, 792H,

OCH<sub>2</sub>CH<sub>2</sub>N, LacOCHHCH<sub>2</sub>, H<sub>3glc</sub>, H<sub>2gal</sub>, H<sub>3gal</sub>, H<sub>6bglc</sub>, H<sub>4gal</sub>, H<sub>6agal</sub>, H<sub>6bgal</sub>, H<sub>6aglc</sub>, H<sub>5gal</sub>, H<sub>5glc</sub>, H<sub>4glc</sub>, LacOCHHCH<sub>2</sub>, OCH<sub>2</sub>, H<sub>2glc</sub>, SCH<sub>2</sub>CONH).

<sup>13</sup>C NMR (150 MHz, D<sub>2</sub>O, δ ppm): ~165.0 (C=O) (*not visible*), 155.6 (C<sub>a</sub>), 145.0 (C<sub>d'</sub>) (*not visible*), 144.6 (C<sub>d</sub>), 143.7 (C<sub>triazole=CH</sub>), 136.2 (C<sub>q core</sub>) (*not visible*), 130.7 (C<sub>a'</sub>) (*not visible*), 126.0 (C<sub>triazole=CH</sub>), 122.4 (C<sub>c</sub> + C<sub>b'</sub> + C<sub>c'</sub>), 116.2 (C<sub>b</sub>), 103.7 (C<sub>1gal</sub>), 102.8 (C<sub>1glc</sub>), 79.1 (C<sub>4glc</sub>), 76.0 (C<sub>3glc</sub>), 75.4 (C<sub>5glc</sub>), 75.0 (C<sub>5gal</sub>), 73.5 (C<sub>2glc</sub>), 73.2 (C<sub>3gal</sub>), 71.6 (C<sub>2gal</sub>), 70.3, 70.2, (OCH<sub>2</sub>), 69.4 (C<sub>4gal</sub>), 69.2 (OCH<sub>2</sub>), 62.1 (OCH<sub>2</sub>C=C), 61.7 (C<sub>6glc</sub>), 60.8 (C<sub>6gal</sub>), 50.7 (NCH<sub>2</sub>), 37.8 (SCH<sub>2</sub>CONH) (*not visible*), 31.2 (C<sub>core</sub>CH<sub>2</sub>S) (*not visible*).

<sup>31</sup>P NMR (122 MHz, D<sub>2</sub>O, δ ppm): 10.1 (br s, 18P).

*m/z* (MALDI-TOF/ DHB matrix) for C<sub>930</sub>H<sub>1374</sub>N<sub>114</sub>O<sub>492</sub>P<sub>18</sub>S<sub>6</sub> = 22773.2, found 22862.0.

NMR diffusion studies (D<sub>2</sub>O): *D* = 0.65×10<sup>-10</sup> m<sup>2</sup>/s; *d<sub>s</sub>* = 6.2 nm.

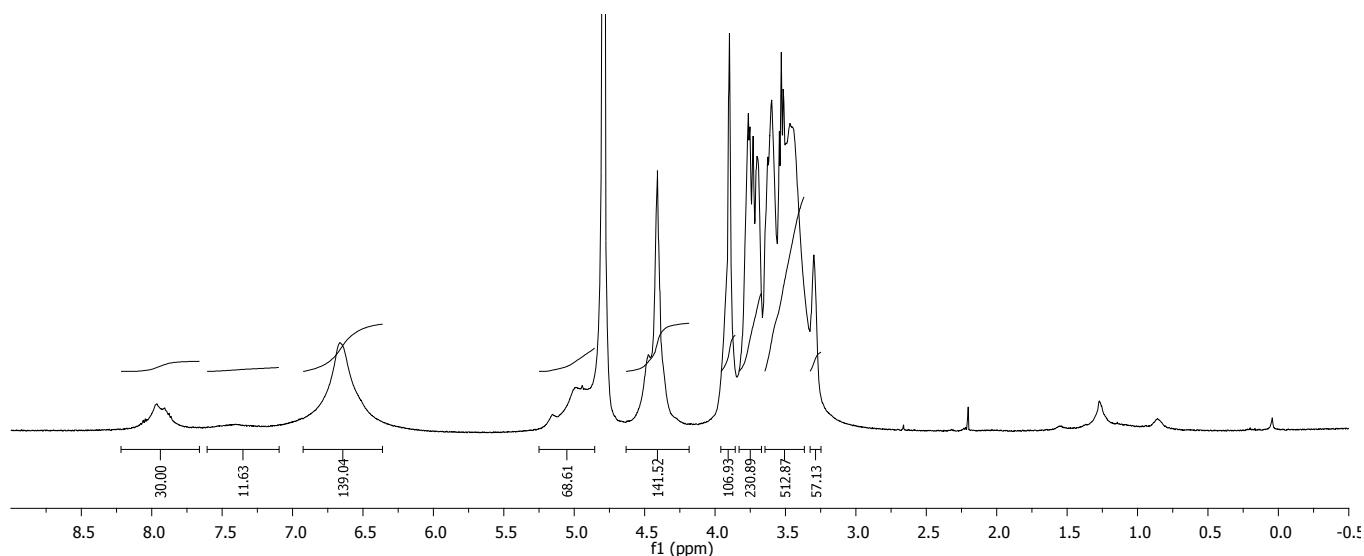

Figure S174. <sup>1</sup>H NMR spectrum of compound **38** (D<sub>2</sub>O, 600MHz)

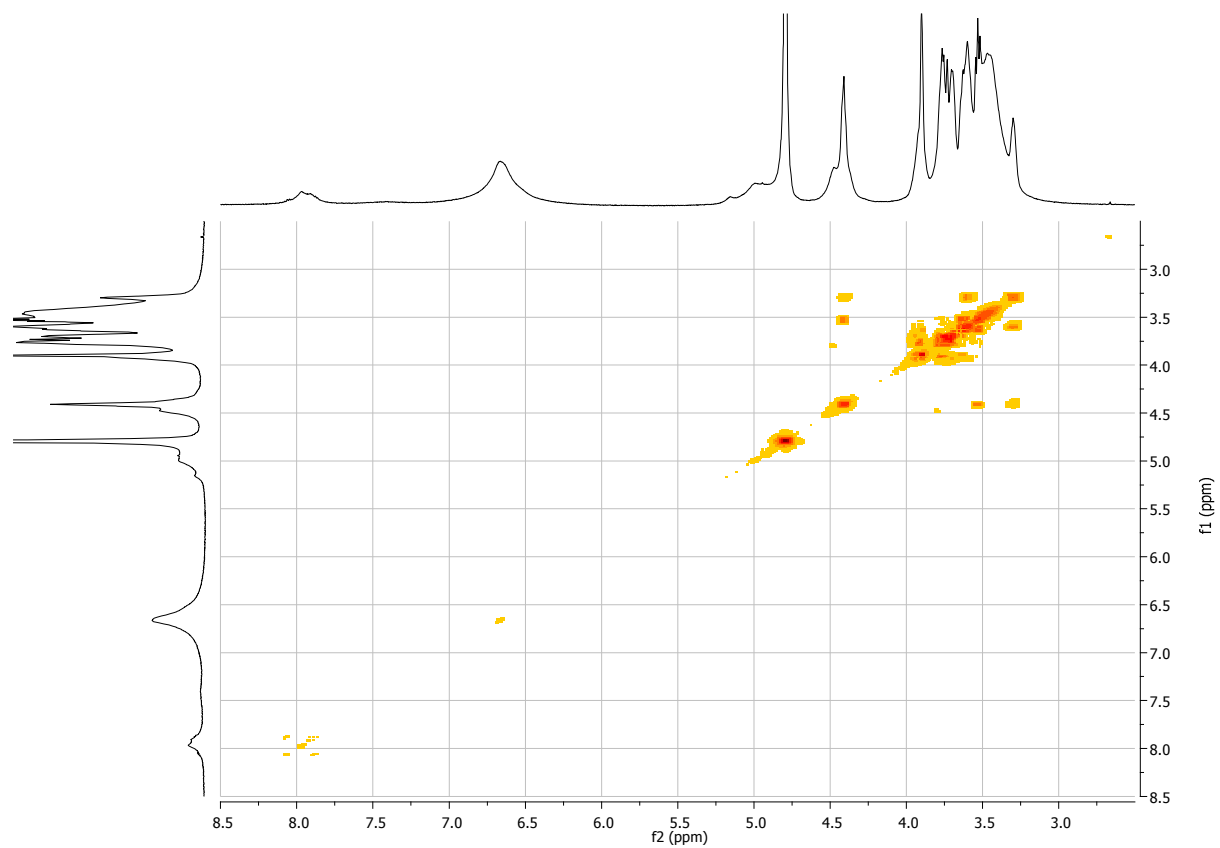

Figure S175. gCOSY spectrum of compound **38**

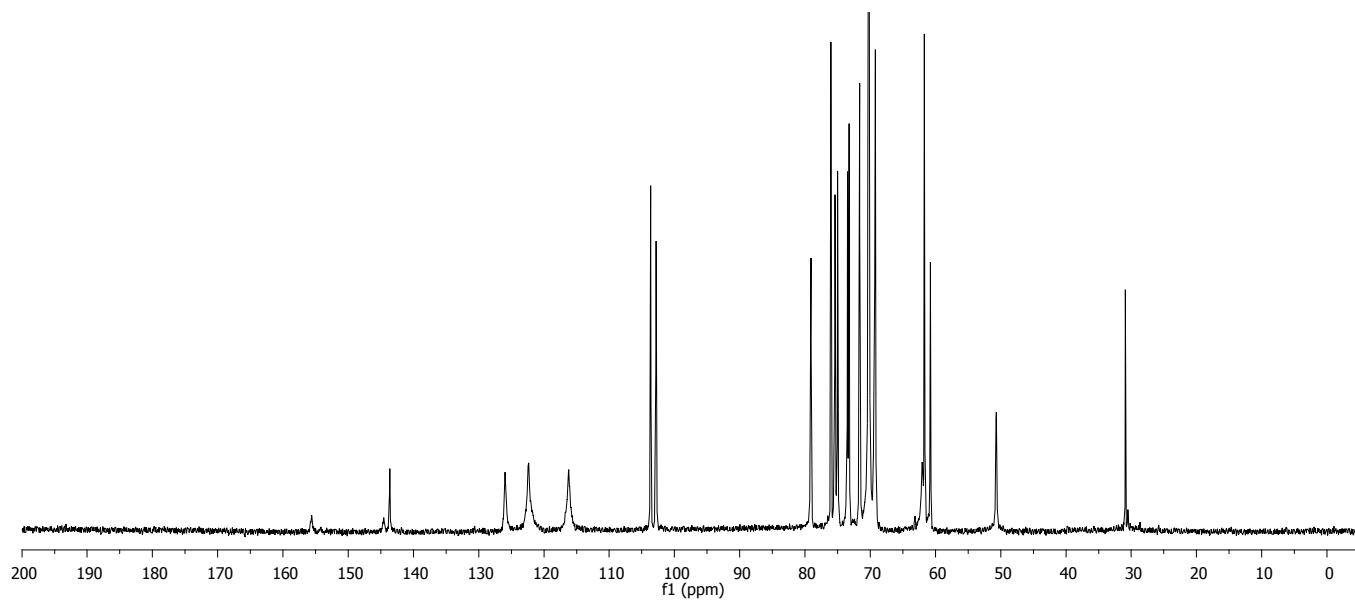

Figure S176.  $^{13}\text{C}$  NMR spectrum of compound **38** ( $\text{D}_2\text{O}$ , 150MHz, acetone as reference)

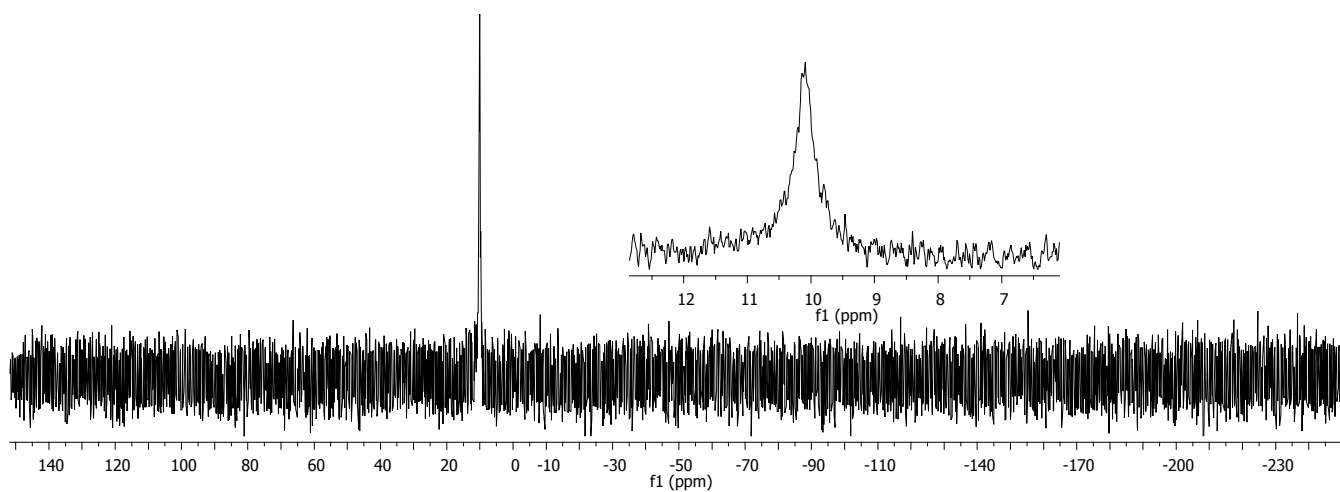

Figure S177.  $^{31}\text{P}$  NMR spectrum of compound **38** ( $\text{D}_2\text{O}$ , 122MHz)

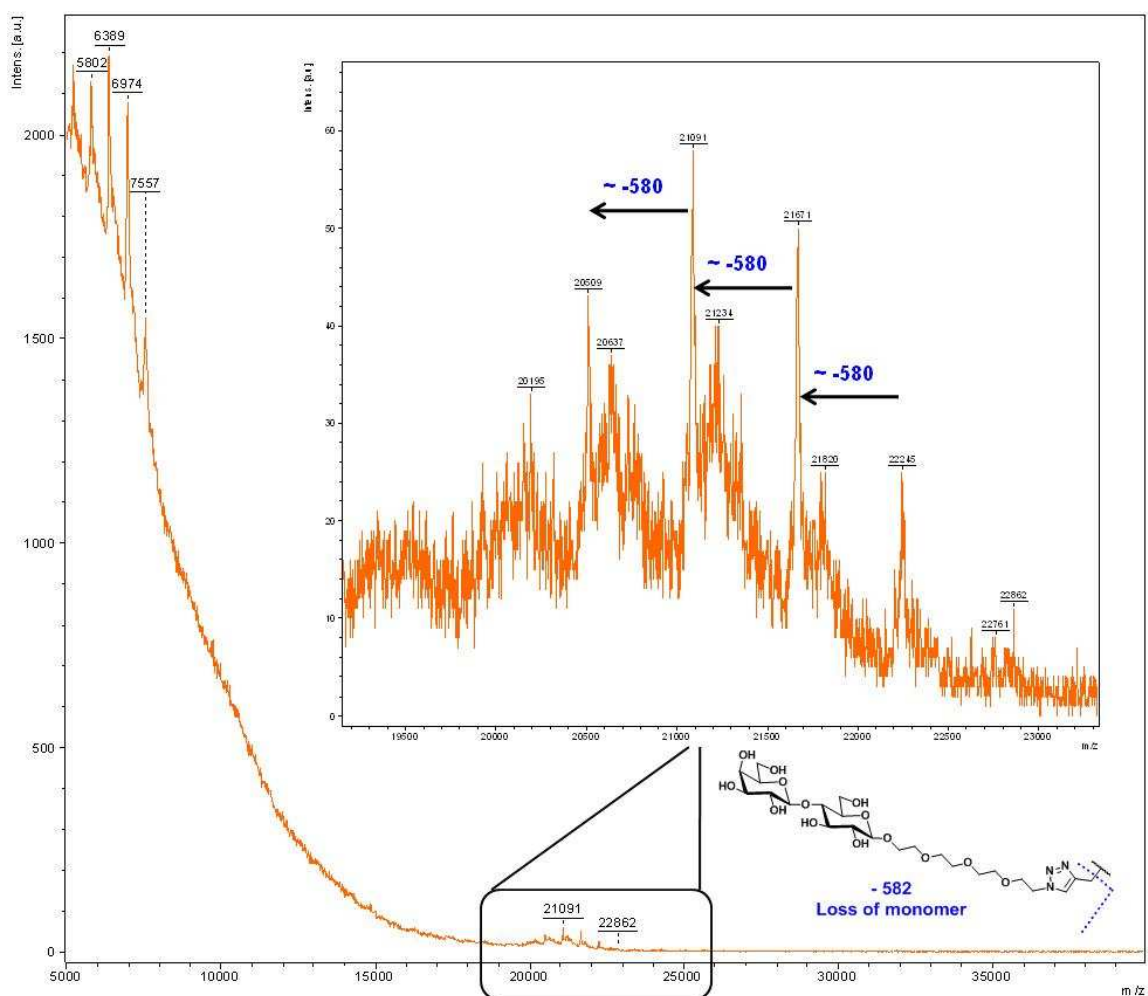

Figure S178. MALDI-TOF (DHB matrix) spectrum of compound **38** with successive losses of monomers

## Hexacontavalent glycodendrimer **39**

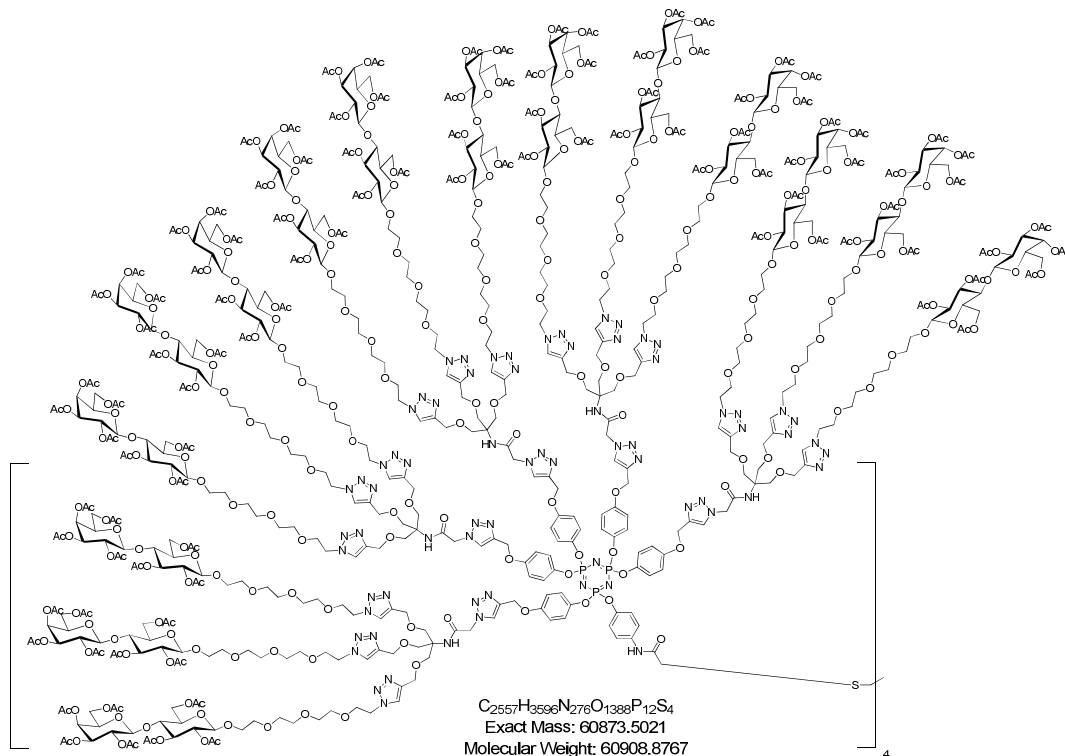

To a solution of icosapropargylated cyclotriphosphazene derivative **34** (2.35 mg, 0.55  $\mu\text{mol}$ , 1.0 eq.) in a 1:1 mixture of  $\text{H}_2\text{O}/\text{THF}_{\text{anh}}$  (3 mL), were added azido derivative **14** (51.8 mg, 18.3  $\mu\text{mol}$ , 33.3 eq.),  $\text{CuSO}_4 \cdot 5\text{H}_2\text{O}$  (4.7 mg, 18.6  $\mu\text{mol}$ , 34.0 eq.) and sodium ascorbate (3.7 mg, 18.6  $\mu\text{mol}$ , 34.0 eq.). While stirring, the mixture was first heated at  $50^\circ\text{C}$  for 3 hours in a 20 mL vial and at room temperature for additional 18 hours. Noteworthy is the fact that 2.5 mg of  $\text{CuSO}_4 \cdot 5\text{H}_2\text{O}$  and 2mg of sodium ascorbate were added to the solution after the 3 hours of heating. Ethyl acetate (30 mL) was added and the solution was poured into a separatory funnel containing ethyl acetate (20 mL), washed with saturated aqueous  $\text{NH}_4\text{Cl}$  (2x20 mL), water (20 mL) and brine (10 mL). Organics were collected, dried over  $\text{Na}_2\text{SO}_4$  and concentrated to dryness *in vacuo* with rotary evaporator. Purification by flash chromatography ( $\text{SiO}_2$ , DCM/MeOH 100:0 to 90:10) afforded desired multivalent compound **39** (26.0 mg, 0.43  $\mu\text{mol}$ , **74%**) as a yellowish oil.

$R_f = 0.15$ , DCM/MeOH 94:6.

$^1\text{H NMR}$  (600 MHz,  $\text{CDCl}_3$ ,  $\delta$  ppm): 7.93 (s, 20H,  $H_{\text{int-triazole}}$ ), 7.73 (s, 60H,  $H_{\text{ext-triazole}}$ ), 7.28 (br s, 12H,  $\text{CH}_b + \text{NH}_{\text{int}}$ ), 6.99-6.60 (br s, 108H,  $\text{CH}_b$ ,  $\text{CH}_c$ ,  $\text{CH}_c' + \text{NH}_{\text{ext}}$ ), 5.33 (br s, 60H,  $H_{4\text{gal}}$ ), 5.19 ( $t_{\text{app}}$ , 60H,  $H_{3\text{glc}}$ ), 5.10-5.02 (m, 100H,  $\text{C}_q\text{-triazole-CH}_2\text{O}$ ,  $H_{2\text{gal}}$ ), 4.95 (dd,  $^3J_{2,3} = 3.4$  Hz,  $^3J_{3,4} = 7.0$  Hz, 60H,  $H_{3\text{gal}}$ ), 4.83 ( $t_{\text{app}}$ , 60H,  $H_{2\text{glc}}$ ), 4.54-4.47 (m, 420H,  $\text{C}_q\text{-triazole-CH}_2\text{OCH}_2$ ,  $\text{OCH}_2\text{CH}_2\text{N}$ ,  $H_{1\text{glc}}$ ,  $H_{6\text{aglc}}$ ,  $H_{1\text{gal}}$ ), 4.10-4.02 (m, 180H,  $H_{6\text{bglc}}$ ,  $H_{6\text{agal}}$ ,  $H_{6\text{bgal}}$ ), 3.86-3.53 (m, 1188H,  $\text{C}_q\text{-triazole-CH}_2\text{OCH}_2\text{C}_{\text{triazole}}$ ,  $\text{NHCOCH}_2\text{N}_{\text{triazole}}$ ,  $\text{OCH}_2\text{CH}_2\text{N}$ ,  $H_{5\text{gal}}$ ,  $H_{5\text{glc}}$ ,  $H_{4\text{glc}}$ ,  $\text{OCH}_2$ ,  $\text{HNCOCH}_2\text{S}$ ), 2.82 (br s, 8H,  $\text{C}_q\text{CH}_2\text{S}$ ), 2.11-1.92 (m, 1260H,  $\text{COCH}_3$ ).

<sup>13</sup>C NMR (150 MHz, CDCl<sub>3</sub>, δ ppm (145000 scans)): 170.2, 170.2, 170.0, 169.9, 169.6, 169.5, 168.9 (7xs, COCH<sub>3</sub>), 166.3 (CONH<sub>int</sub>), 165.2 (CONH<sub>ext</sub>), 155.3 (C<sub>a</sub>), 154.0 (C<sub>a</sub>), 149.9 (C<sub>d'</sub>), 144.3 (C<sub>d</sub>), 144.2 (C<sub>triazole=CH</sub>), 143.3 (C<sub>triazole=CH</sub>), 135.2 (C<sub>a'</sub>), 125.4 (C<sub>triazole=CH</sub>), 123.9 (C<sub>triazole=CH</sub>), 121.8 (C<sub>c</sub>), 121.4 (C<sub>b'</sub>), 116.1 (C<sub>b</sub>), 115.2 (C<sub>b</sub>), 101.0 (C<sub>1gal</sub>), 100.4 (C<sub>1glc</sub>), 76.2 (C<sub>4glc</sub>), 72.8 (C<sub>3glc</sub>), 72.6 (C<sub>5glc</sub>), 71.6 (C<sub>2glc</sub>), 70.9 (C<sub>3gal</sub>), 70.5 (C<sub>5gal</sub>), 70.4, 70.3, 70.2, 70.2, 70.0, 69.3 (OCH<sub>2</sub>), 69.0 (C<sub>2gal</sub>), 68.9 (OCH<sub>2</sub>), 68.6 (C<sub>q</sub>CH<sub>2</sub>O), 66.6 (C<sub>4gal</sub>), 64.5 (OCH<sub>2</sub>C=C), 62.0 (C<sub>6glc</sub>), 61.9 (C<sub>q</sub>), 60.6 (C<sub>6gal</sub>), 60.3 (NCH<sub>2</sub>), 52.5 (HNCOCH<sub>2</sub>N<sub>triazole</sub>), 49.9 (OCH<sub>2</sub>), 45.9 (C<sub>q</sub>), 37.4 (SCH<sub>2</sub>CONH), 37.0 (C<sub>q</sub>CH<sub>2</sub>S), 20.9, 20.8, 20.6, 20.5, 20.5, 20.4 (7xs, COCH<sub>3</sub>).

<sup>31</sup>P NMR (122 MHz, CDCl<sub>3</sub>, δ ppm): 10.0-9.6 (m, 12P).

*m/z* (MALDI-TOF/DHB matrix) for C<sub>2557</sub>H<sub>3596</sub>N<sub>276</sub>O<sub>1388</sub>P<sub>12</sub>S<sub>4</sub>= 60908.9; found: 59682-centered Gaussian.

NMR diffusion studies (CDCl<sub>3</sub>): *D* = 1.07 × 10<sup>-10</sup> m<sup>2</sup>/s; *d<sub>s</sub>* = 7.6 nm.

GPC measurements (CHCl<sub>3</sub>/Et<sub>3</sub>N (1%)): *M<sub>w</sub>* = 76570 ; *M<sub>n</sub>* = 75530 , PDI (*M<sub>w</sub>*/*M<sub>n</sub>*) = 1.014.

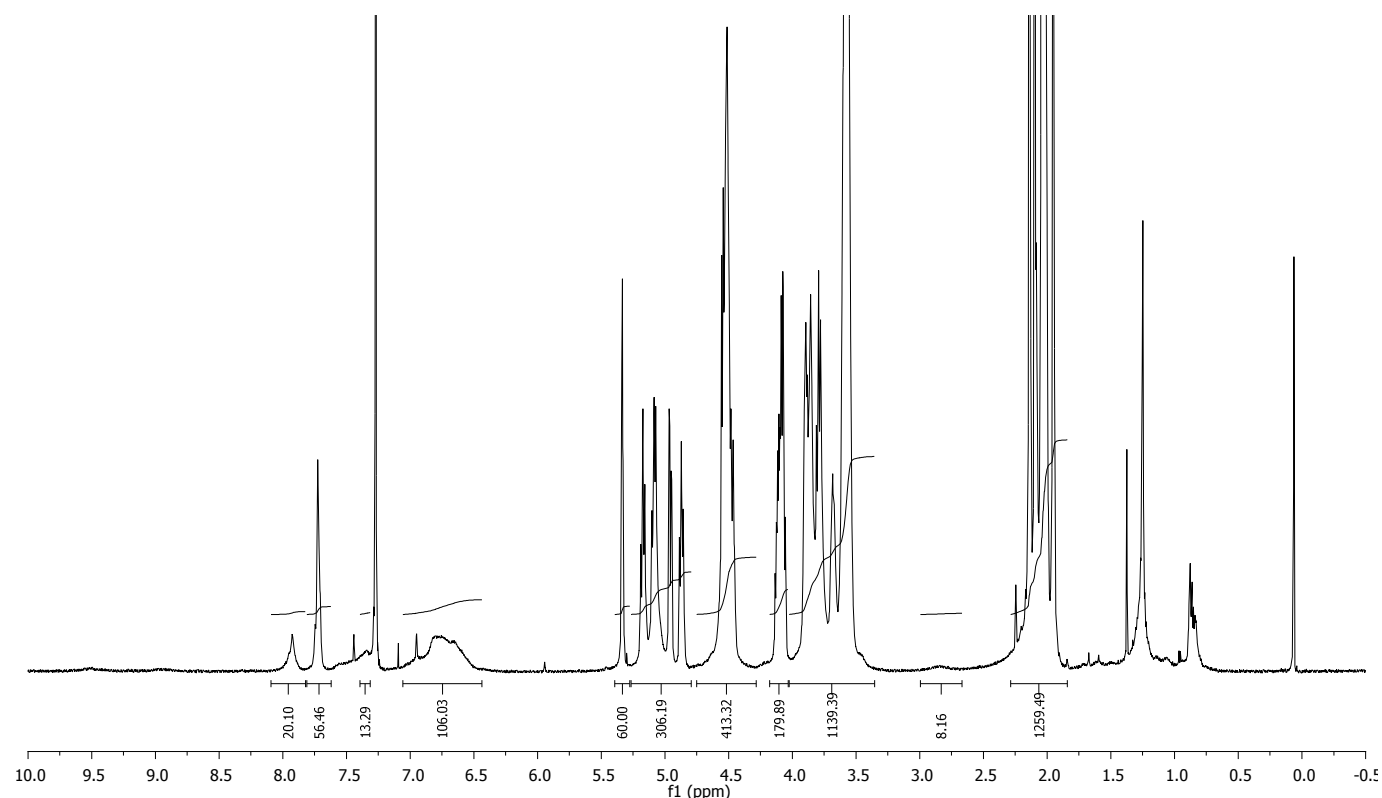

Figure S179. <sup>1</sup>H NMR spectrum of compound **39** (CDCl<sub>3</sub>, 600MHz)

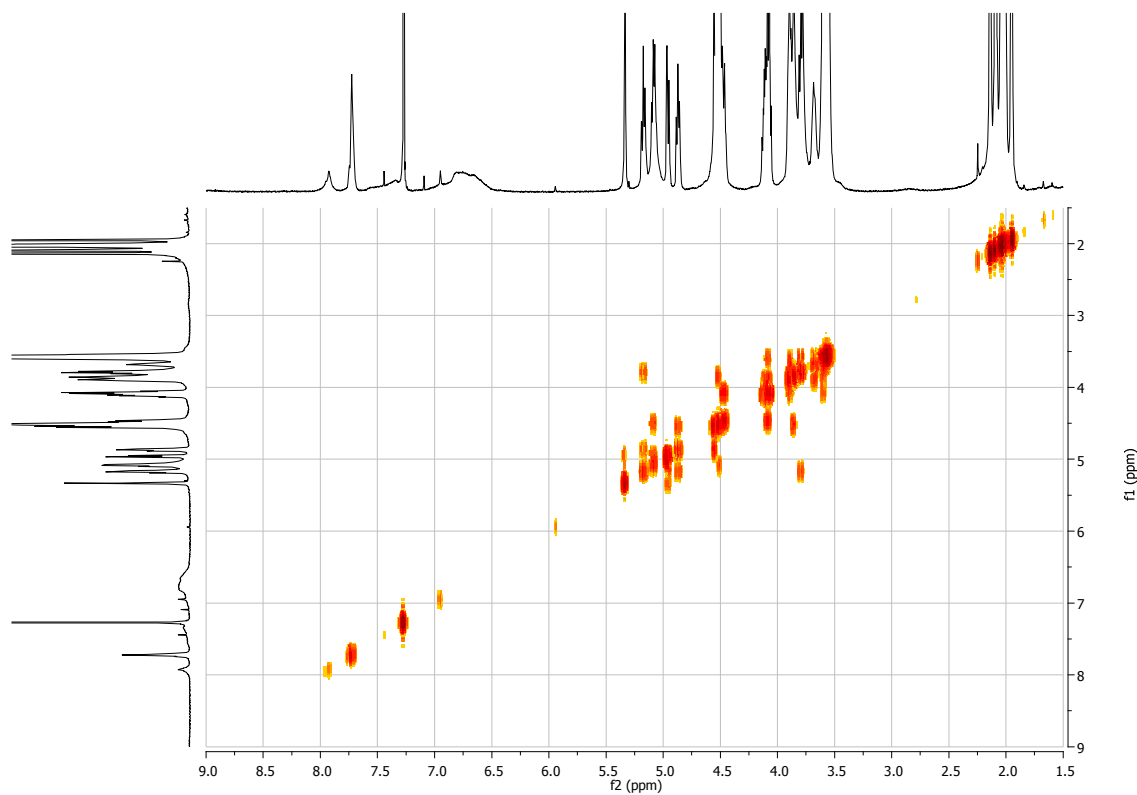

Figure S180. gCOSY spectrum of compound **39**

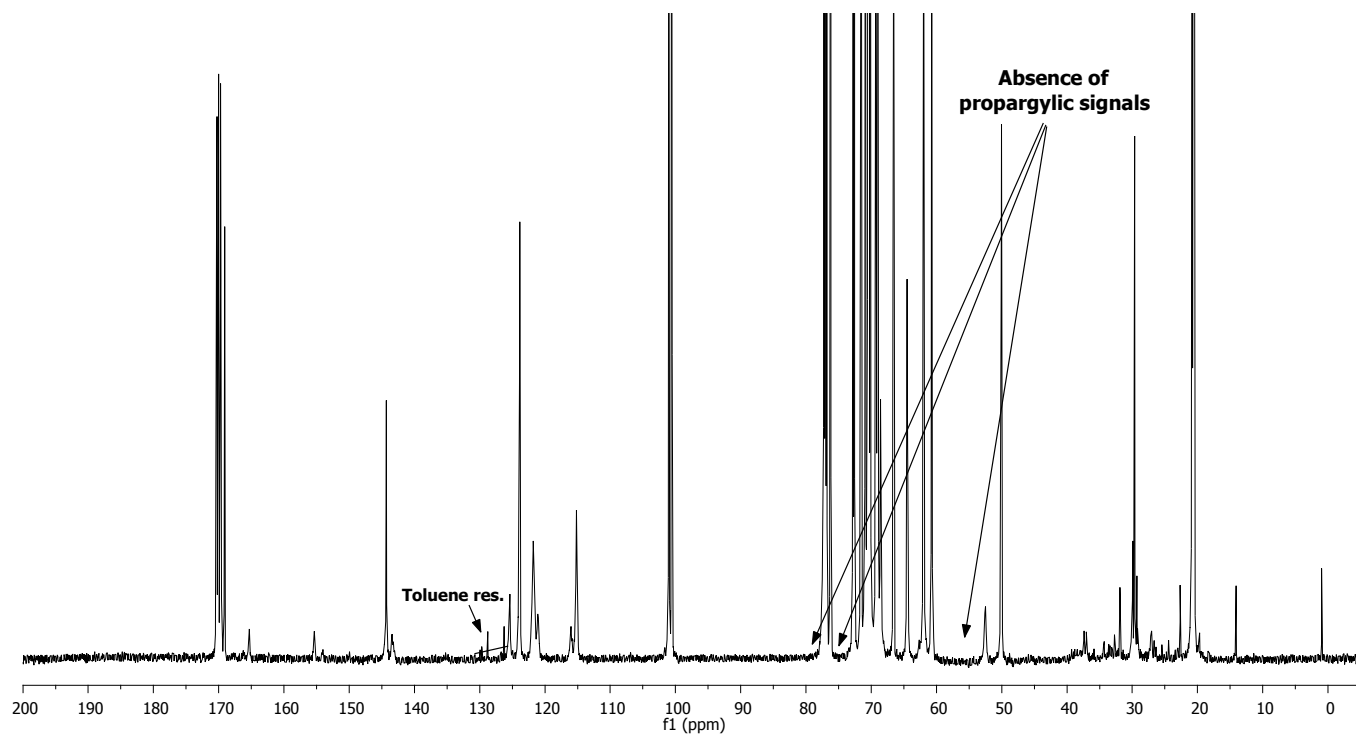

Figure S181.  $^{13}\text{C}$  NMR spectrum of compound **39** ( $\text{CDCl}_3$ , 150MHz, 145000 scans)



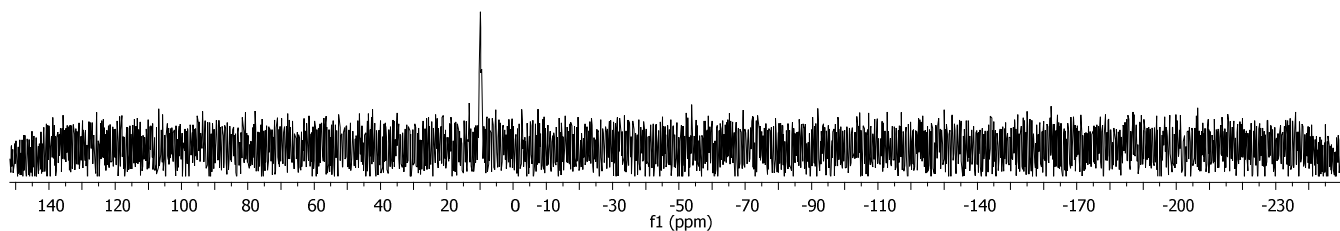

**Figure S182.**  $^{31}\text{P}$  NMR spectrum of compound **39** ( $\text{CDCl}_3$ , 122MHz)

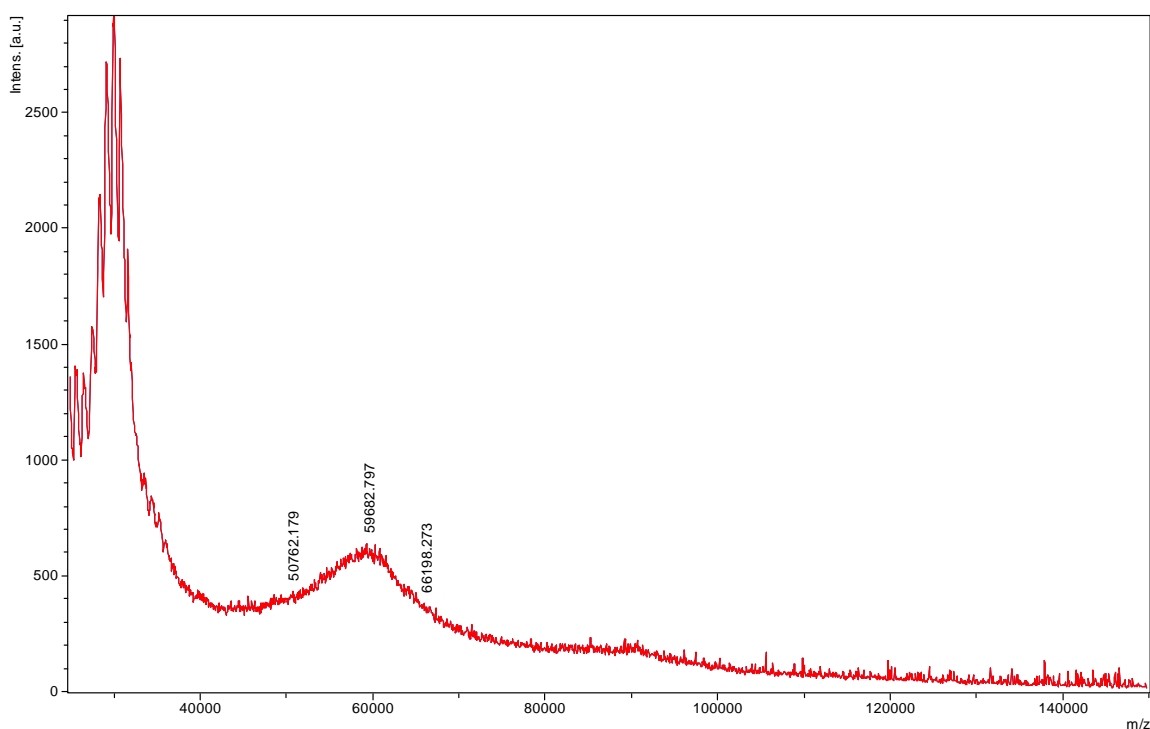

**Figure S183.** MALDI-TOF (DHB matrix) of compound **39**

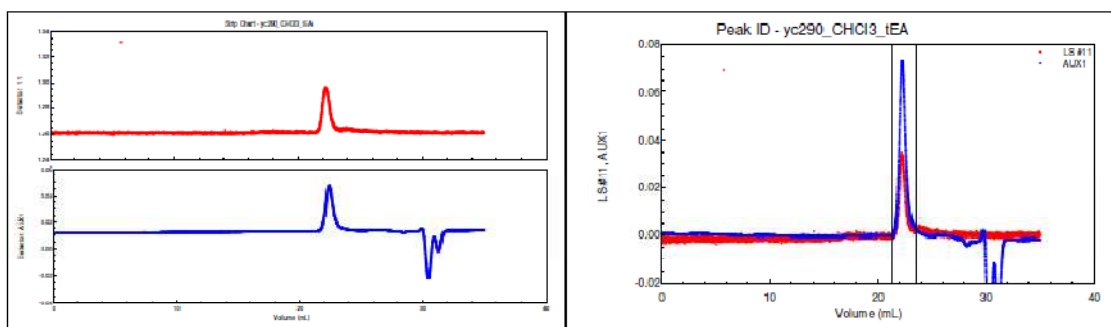

Polydispersity(Mw/Mn) : 1.014±0.132 (13%)  
 Polydispersity(Mz/Mn) : 1.038±0.248 (24%)

Molar Mass Moments (g/mol)  
 Mn : 7.553e+04 (9%)  
 Mw : 7.657e+04 (9%)  
 Mz : 7.840e+04 (22%)

**Figure S184.** GPC trace ( $\text{CHCl}_3/\text{Et}_3\text{N}$  (1%)) for compound **39**

**Defectuous glycodendrimer 39a (location of propargylic functions is arbitrary)**

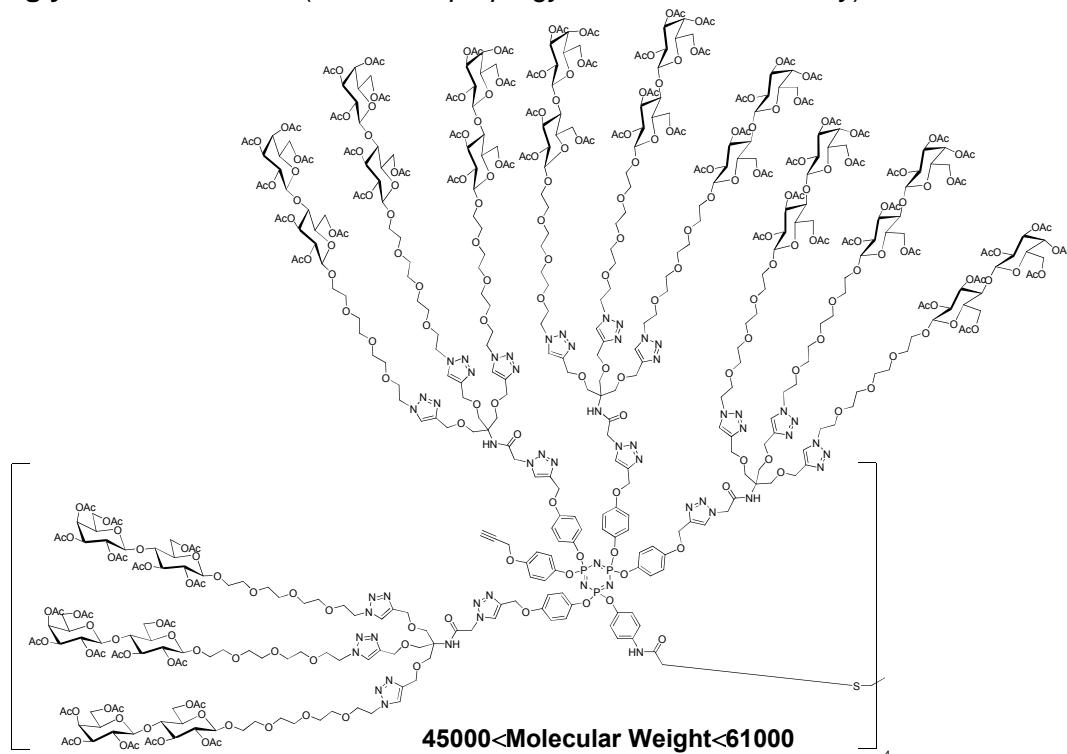

To a solution of icosapropargylated cyclotriphosphazene derivative **34** (2.66 mg, 0.62  $\mu\text{mol}$ , 1.0 eq.) in a 1:1 mixture of  $\text{H}_2\text{O}/\text{THF}_{\text{anh}}$  (3 mL), were added azido derivative **14** (30.0 mg, 10.6  $\mu\text{mol}$ , 17.0 eq.),  $\text{CuSO}_4 \cdot 5\text{H}_2\text{O}$  (5.3 mg, 21.1  $\mu\text{mol}$ , 34.0 eq.) and sodium ascorbate (4.2 mg, 21.1  $\mu\text{mol}$ , 34.0 eq.). While stirring, the mixture was first heated at  $50^\circ\text{C}$  for 3 hours in a 20 mL vial and at room temperature for additional 18 hours. Ethyl acetate (30 mL) was added and the solution was poured into a separatory funnel containing ethyl acetate (20 mL), washed with saturated aqueous  $\text{NH}_4\text{Cl}$  (2x20 mL), water (20 mL) and brine (10 mL). Organics were collected, dried over  $\text{Na}_2\text{SO}_4$  and concentrated to dryness *in vacuo* with rotary evaporator. Purification by flash chromatography ( $\text{SiO}_2$ ,  $\text{DCM}/\text{MeOH}$  100:0 to 90:10) afforded desired mixture of compounds presenting an average of 3 remaining propargylic functionalities **39a** (24.0 mg, 0.47  $\mu\text{mol}$ , **75%**) (based on a  $\text{MW} = 52414$  for 17 grafted dendrons) as a colorless oil.

$R_f = 0.15$ ,  $\text{DCM}/\text{MeOH}$  94:6.

**$^1\text{H NMR}$**  (600 MHz,  $\text{CDCl}_3$ ,  $\delta$  ppm): 7.93 (s, 17H,  $H_{\text{int-triazole}}$ ), 7.73 (s, 48H,  $H_{\text{ext-triazole}}$ ), 7.28 (br s, 12H,  $\text{CH}_b + \text{NH}_{\text{int}}$ ), 6.99-6.60 (br s, 105H,  $\text{CH}_b, \text{CH}_c, \text{CH}_c + \text{NH}_{\text{ext}}$ ), 5.33 (br s, 51H,  $H_{4\text{gal}}$ ), 5.19 ( $t_{\text{app}}$ , 51H,  $H_{3\text{glc}}$ ), 5.10-5.02 (m, 85H,  $\text{C}_q\text{-triazole-CH}_2\text{O}$ ,  $H_{2\text{gal}}$ ), 4.95 (dd,  $^3J_{2,3} = 3.4$  Hz,  $^3J_{3,4} = 7.0$  Hz, 51H,  $H_{3\text{gal}}$ ), 4.83 ( $t_{\text{app}}$ , 51H,  $H_{2\text{glc}}$ ), **4.70-4.60 (br s, 6H,  $\text{OCH}_2\text{C}\equiv\text{CH res.}$ )**, 4.54-4.47 (m, 357H,  $\text{C}_q\text{-triazole-CH}_2\text{OCH}_2$ ,  $\text{OCH}_2\text{CH}_2\text{N}$ ,  $H_{1\text{glc}}$ ,  $H_{6\text{glc}}$ ,  $H_{1\text{gal}}$ ), 4.10-4.02 (m, 153H,  $H_{6\text{bglc}}$ ,  $H_{6\text{agal}}$ ,  $H_{6\text{bgal}}$ ), 3.86-3.53 (m, 1011H,  $\text{C}_q\text{-triazole-CH}_2\text{OCH}_2\text{C}_{\text{triazole}}$ ,  $\text{NHCOCH}_2\text{N}_{\text{triazole}}$ ,  $\text{OCH}_2\text{CH}_2\text{N}$ ,  $H_{5\text{gal}}$ ,  $H_{5\text{glc}}$ ,  $H_{4\text{glc}}$ ,  $\text{OCH}_2$ ,  $\text{HNCOCH}_2\text{S}$ ), 2.82 (br s, 8H,  $\text{C}_q\text{CH}_2\text{S}$ ), **2.65 (2xbr s, 3H,  $\text{OCH}_2\text{C}\equiv\text{CH res.}$ )**, 2.11-1.92 (m, 1071H,  $\text{COCH}_3$ ).

**$^{13}\text{C NMR}$**  (150 MHz,  $\text{CDCl}_3$ ,  $\delta$  ppm): 170.2, 170.2, 170.0, 169.9, 169.6, 169.5, 168.9 (7xs,  $\text{COCH}_3$ ), 166.3 ( $\text{CONH}_{\text{int}}$ ), 165.2 ( $\text{CONH}_{\text{ext}}$ ), 155.3 ( $\text{C}_a$ ), 154.0 ( $\text{C}_a$ ), 149.9 ( $\text{C}_d'$ ), 144.3 ( $\text{C}_d$ ), 144.2 ( $\text{C}_{\text{triazole}=\text{CH}}$ ), 143.3 ( $\text{C}_{\text{triazole}=\text{CH}}$ ), 135.2 ( $\text{C}_a'$ ),

125.4 ( $C_{\text{triazole}=\text{CH}}$ ), 123.9 ( $C_{\text{triazole}=\text{CH}}$ ), 121.8 ( $C_c$ ), 121.4 ( $C_{b'}$ ), 116.1 ( $C_b$ ), 115.2 ( $C_b$ ), 101.0 ( $C_{1\text{gal}}$ ), 100.4 ( $C_{1\text{glc}}$ ), 76.2 ( $C_{4\text{glc}}$ ), 72.8 ( $C_{3\text{glc}}$ ), 72.6 ( $C_{5\text{glc}}$ ), 71.6 ( $C_{2\text{glc}}$ ), 70.9 ( $C_{3\text{gal}}$ ), 70.5 ( $C_{5\text{gal}}$ ), 70.4, 70.3, 70.2, 70.2, 70.0, 69.3 ( $\text{OCH}_2$ ), 69.0 ( $C_{2\text{gal}}$ ), 68.9 ( $\text{OCH}_2$ ), 68.6 ( $C_q\text{CH}_2\text{O}$ ), 66.6 ( $C_{4\text{gal}}$ ), 64.5 ( $\text{OCH}_2\text{C}=\text{C}$ ), 62.0 ( $C_{6\text{glc}}$ ), 61.9 ( $C_q$ ), 60.6 ( $C_{6\text{gal}}$ ), 60.3 ( $\text{NCH}_2$ ), **56.1 ( $\text{OCH}_2\text{C}=\text{CH}$  res.)**, 52.5 ( $\text{HNCOCH}_2\text{N}_{\text{triazole}}$ ), 49.9 ( $\text{OCH}_2$ ), 45.9 ( $C_q$ ), 37.4 ( $\text{SCH}_2\text{CONH}$ ), 37.0 ( $C_q\text{CH}_2\text{S}$ ), 20.9, 20.8, 20.6, 20.5, 20.5, 20.4 (7xs,  $\text{COCH}_3$ ).

$m/z$  (MALDI-TOF/DHB matrix), found: 50696-centered Gaussian.

GPC measurements ( $\text{CHCl}_3/\text{Et}_3\text{N}$  (1%)):  $M_w = 73780$  ;  $M_n = 72270$  , PDI ( $M_w/M_n$ ) = 1.021

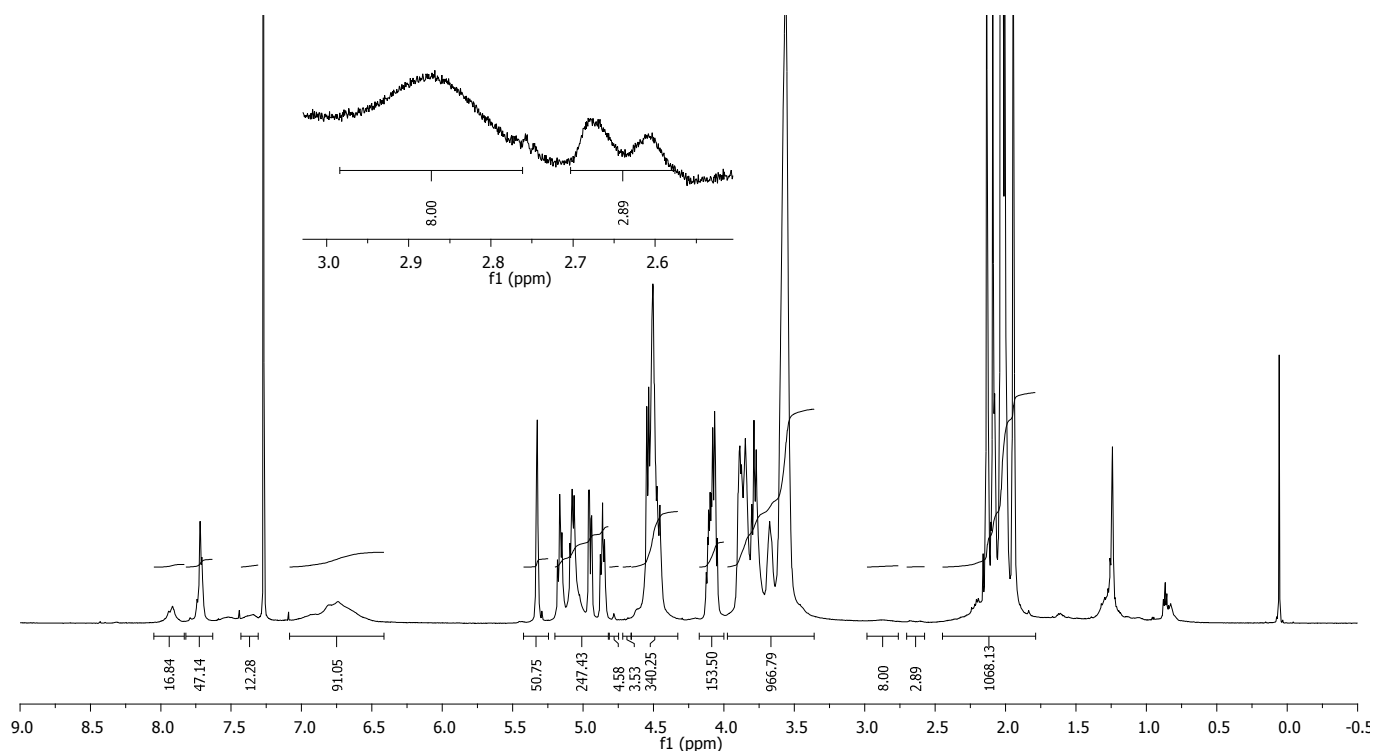

Figure S185.  $^1\text{H}$  NMR spectrum of compound **39a** ( $\text{CDCl}_3$ , 600MHz)

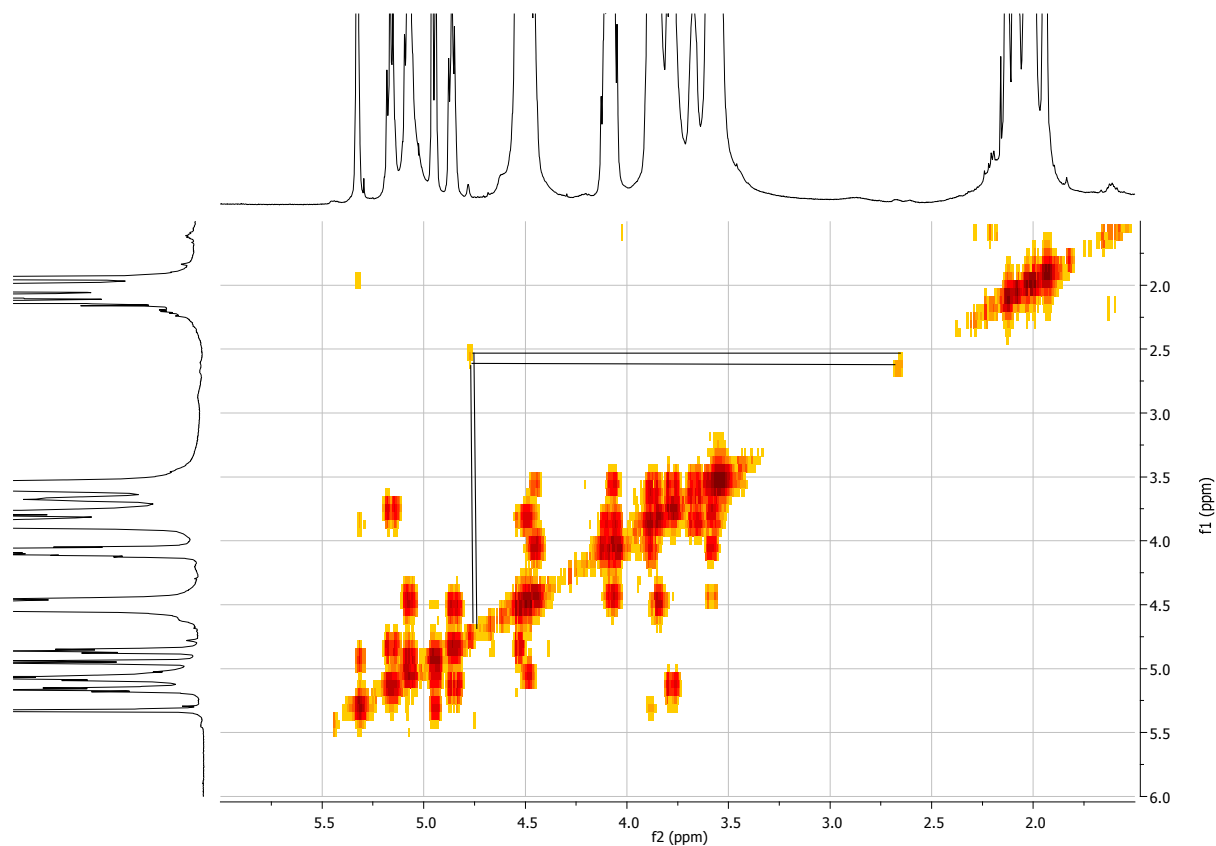

Figure S186. gCOSY spectrum of compound 39a

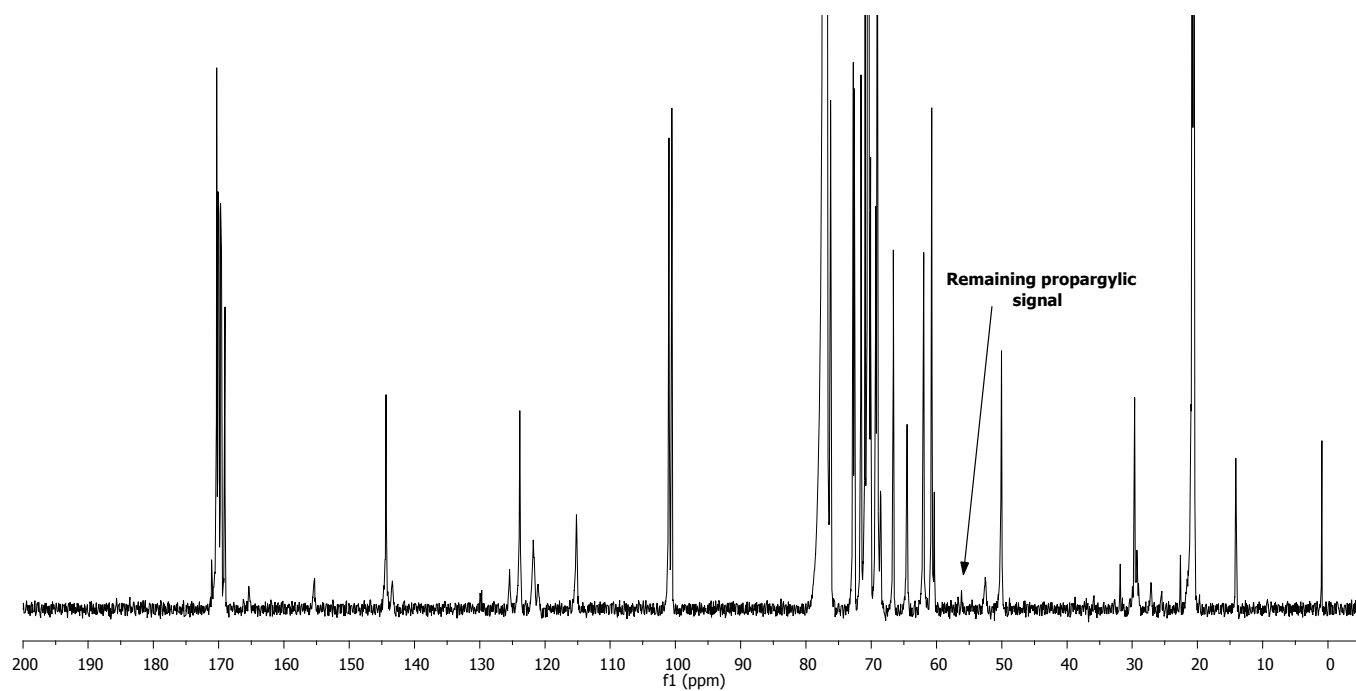

Figure S187.  $^{13}\text{C}$  NMR spectrum of compound 39a ( $\text{CDCl}_3$ , 150MHz, 58000 scans)

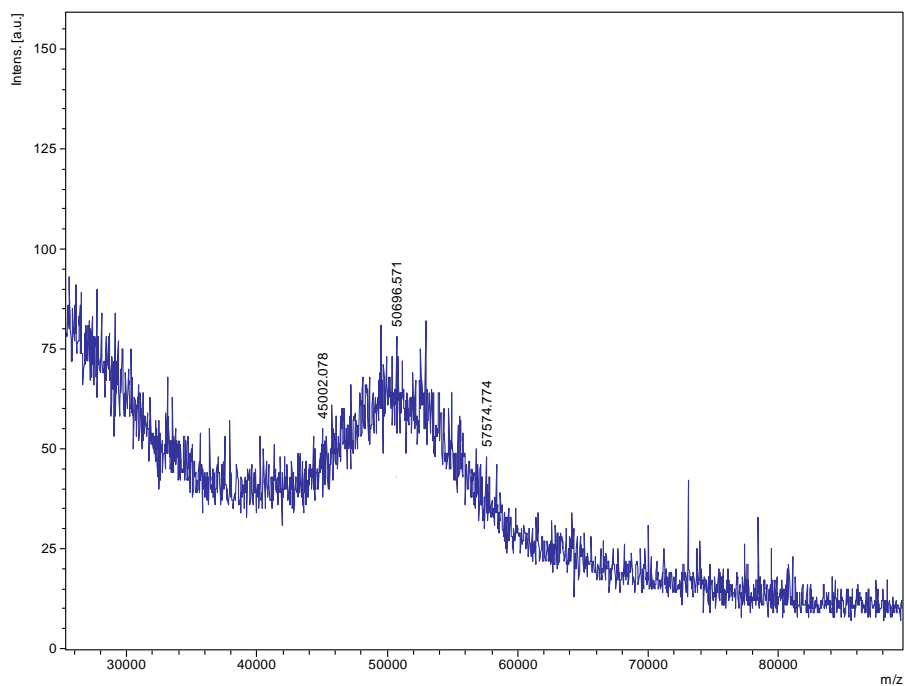

**Figure S188.** MALDI-TOF (DHB matrix) spectrum of compound **39a**

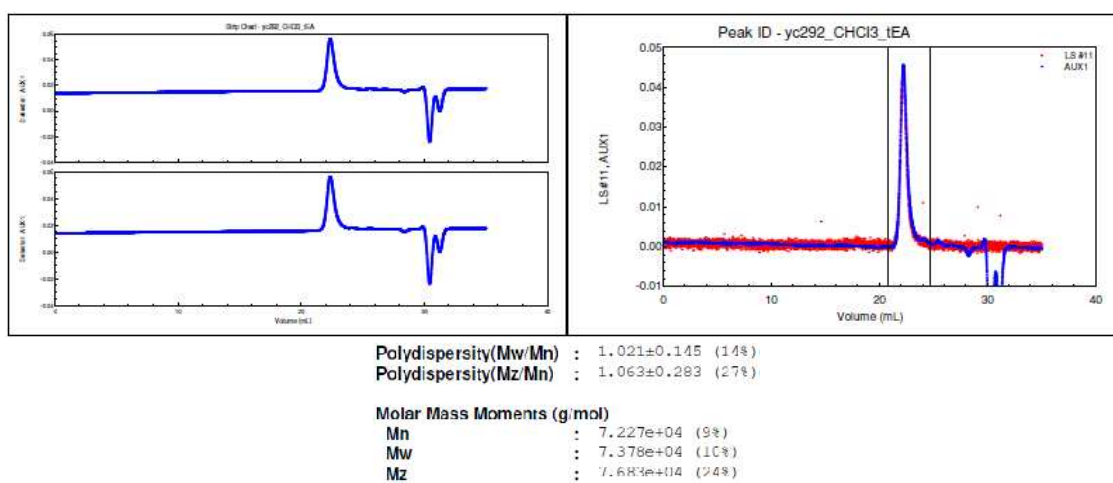

**Figure S189.** GPC trace ( $\text{CHCl}_3/\text{Et}_3\text{N}$  (1%)) for compound **39a**

## Protected nonacontavalent glycodendrimer **40**

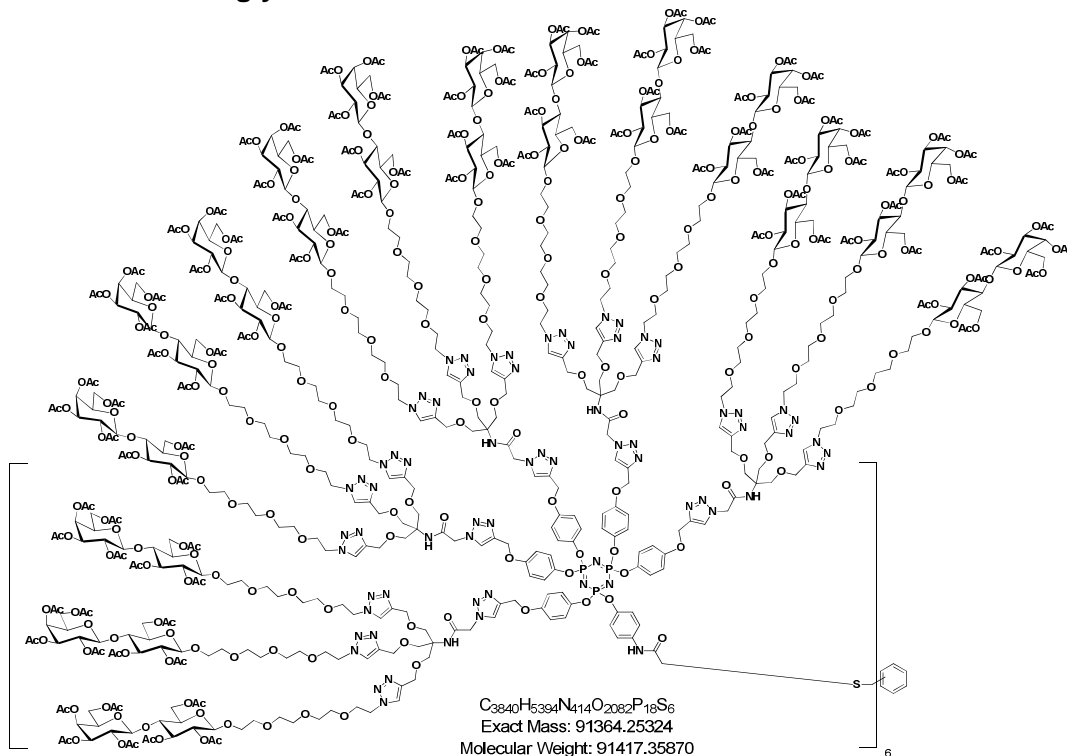

To a solution of tricontapropargylated cyclotriphosphazene derivative **35** (3.80 mg, 0.59  $\mu\text{mol}$ , 1.0 eq.) in a 1:1 mixture of  $\text{H}_2\text{O}/\text{THF}_{\text{anh}}$  (4 mL), were added azido dendron **14** (83.2 mg, 29.4  $\mu\text{mol}$ , 50.0 eq.),  $\text{CuSO}_4 \cdot 5\text{H}_2\text{O}$  (6.10 mg, 23.5  $\mu\text{mol}$ , 40.0 eq.) and sodium ascorbate (4.80 mg, 23.5  $\mu\text{mol}$ , 40.0 eq.). While stirring, the mixture was first heated at  $50^\circ\text{C}$  for 3 hours in a 20 mL vial and at room temperature for additional 18 hours. Noteworthy is the fact that 3.0 mg of  $\text{CuSO}_4 \cdot 5\text{H}_2\text{O}$  and 2.0 mg of sodium ascorbate were added to the solution after the 3 hours of heating. Ethyl acetate (5 mL) was added and the solution was poured into a separatory funnel containing ethyl acetate (20 mL), washed with saturated aqueous  $\text{NH}_4\text{Cl}$  (2x20 mL), water (20 mL) and brine (10 mL). Organics were collected, dried over  $\text{Na}_2\text{SO}_4$  and concentrated to dryness *in vacuo* with rotary evaporator. Purification by flash chromatography ( $\text{SiO}_2$ , DCM/MeOH 100:0 to 90:10) afforded desired multivalent compound **40** (38.0 mg, 0.42  $\mu\text{mol}$ , **72%**) as a pale oil.

$R_f = 0.13$ , DCM/MeOH 94:6.

$^1\text{H NMR}$  (600 MHz,  $\text{CDCl}_3$ ,  $\delta$  ppm): 7.93 (s, 30H,  $H_{\text{int-triazole}}$ ), 7.73 (s, 90H,  $H_{\text{ext-triazole}}$ ), 7.28 (br s, 42H,  $\text{CH}_b + \text{NH}_{\text{ext}}$ ), 6.99-6.60 (br s, 138H,  $\text{CH}_b, \text{CH}_c, \text{CH}_c' + \text{NH}_{\text{int}}$ ), 5.32 (br s, 90H,  $H_{4\text{gal}}$ ), 5.16 ( $t_{\text{app}}$ , 90H,  $H_{3\text{glc}}$ ), 5.10-5.02 (m, 150H,  $\text{C}_q\text{-triazole-CH}_2\text{O}$ ,  $H_{2\text{gal}}$ ), 4.95 (dd,  $^3J_{2,3} = 3.4$  Hz,  $^3J_{3,4} = 7.0$  Hz, 90H,  $H_{3\text{gal}}$ ), 4.86 ( $t_{\text{app}}$ , 90H,  $H_{2\text{glc}}$ ), 4.54-4.47 (m, 630H,  $\text{C}_q\text{-triazole-CH}_2\text{OCH}_2$ ,  $\text{OCH}_2\text{CH}_2\text{N}$ ,  $H_{1\text{glc}}$ ,  $H_{6\text{aglc}}$ ,  $H_{1\text{gal}}$ ), 4.14-4.02 (m, 282H,  $\text{C}_{\text{core}}\text{CH}_2\text{S}$ ,  $H_{6\text{bglc}}$ ,  $H_{6\text{agal}}$ ,  $H_{6\text{bgal}}$ ), 3.95-3.25 (m, 1782H,  $\text{C}_q\text{-triazole-CH}_2\text{OCH}_2\text{C}_{\text{triazole}}$ ,  $\text{NHCOCH}_2\text{N}_{\text{triazole}}$ ,  $\text{OCH}_2\text{CH}_2\text{N}$ ,  $H_{5\text{gal}}$ ,  $H_{5\text{glc}}$ ,  $H_{4\text{glc}}$ ,  $\text{OCH}_2$ ,  $\text{HNCOCH}_2\text{S}$ ), 2.11-1.92 (m, 1890H,  $\text{COCH}_3$ ).

$^{13}\text{C NMR}$  (150 MHz,  $\text{CDCl}_3$ ,  $\delta$  ppm): 170.2, 170.2, 170.0, 169.9, 169.6, 169.5, 168.9 (7xs,  $\text{COCH}_3$ ), 165.9 ( $\text{CONH}_{\text{int}}$ ), 165.6 ( $\text{CONH}_{\text{ext}}$ ), 155.3 ( $\text{C}_a$ ), 149.9 ( $\text{C}_d$ ) (not visible), 144.3 ( $\text{C}_d$ ), 144.2 ( $\text{C}_{\text{triazole}=\text{CH}}$ ), 143.3 ( $\text{C}_{\text{triazole}=\text{CH}}$ ), 136.2 ( $\text{C}_q\text{ core}$ )

(not visible), 135.2 ( $C_{a'}$ ) (not visible), 125.5 ( $C_{\text{triazole}=\text{CH}}$ ), 123.9 ( $C_{\text{triazole}=\text{CH}}$ ), 121.8 ( $C_c$ ), 121.4 ( $C_b$ ), 116.1 ( $C_b$ ), 115.1 ( $C_b$ ), 101.0 ( $C_{1\text{gal}}$ ), 100.5 ( $C_{1\text{glc}}$ ), 76.2 ( $C_{4\text{glc}}$ ), 72.8 ( $C_{3\text{glc}}$ ), 72.6 ( $C_{5\text{glc}}$ ), 71.6 ( $C_{2\text{glc}}$ ), 70.9 ( $C_{3\text{gal}}$ ), 70.5 ( $C_{5\text{gal}}$ ), 70.4, 70.3, 70.2, 70.2, 70.0, 69.3 ( $\text{OCH}_2$ ), 69.0 ( $C_{2\text{gal}}$ ), 68.9 ( $\text{OCH}_2$ ), 68.6 ( $C_q\text{CH}_2\text{O}$ ), 66.6 ( $C_{4\text{gal}}$ ), 64.5 ( $\text{OCH}_2\text{C}=\text{C}$ ), 62.0 ( $C_{6\text{glc}}$ ), 61.9 ( $C_q$ ), 60.6 ( $C_{6\text{gal}}$ ), 60.3 ( $\text{NCH}_2$ ), 52.5 ( $\text{HNCOCH}_2\text{N}_{\text{triazole}}$ ), 49.9 ( $\text{OCH}_2$ ), 37.3 ( $\text{SCH}_2\text{CONH}$ ), 31.2 ( $C_{\text{core}}\text{CH}_2\text{S}$ ), 20.9, 20.8, 20.6, 20.5, 20.5, 20.4 (7xs,  $\text{COCH}_3$ ).

$^{31}\text{P}$  NMR (122 MHz,  $\text{CDCl}_3$ ,  $\delta$  ppm): 10.0-9.2 (m, 18P).

$m/z$  (MALDI-TOF/DHB matrix) for  $\text{C}_{3840}\text{H}_{5394}\text{N}_{414}\text{O}_{2082}\text{P}_{18}\text{S}_6 = 91417.4$ ; found: 79824-centered Gaussian.

NMR diffusion studies ( $\text{CDCl}_3$ ):  $D = 0.81 \times 10^{-10} \text{ m}^2/\text{s}$ ;  $d_s = 10.1 \text{ nm}$ .

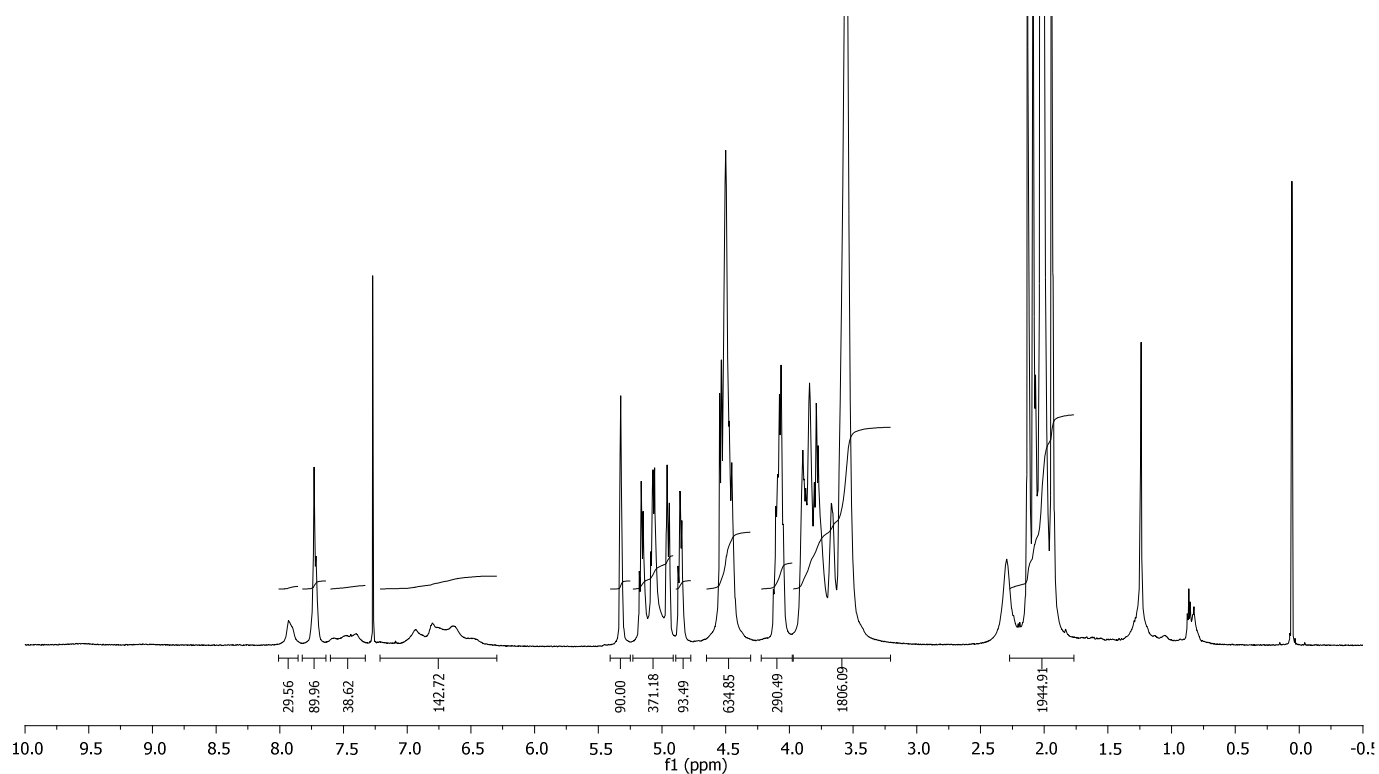

Figure S190.  $^1\text{H}$  NMR spectrum of compound **40** ( $\text{CDCl}_3$ , 600MHz)

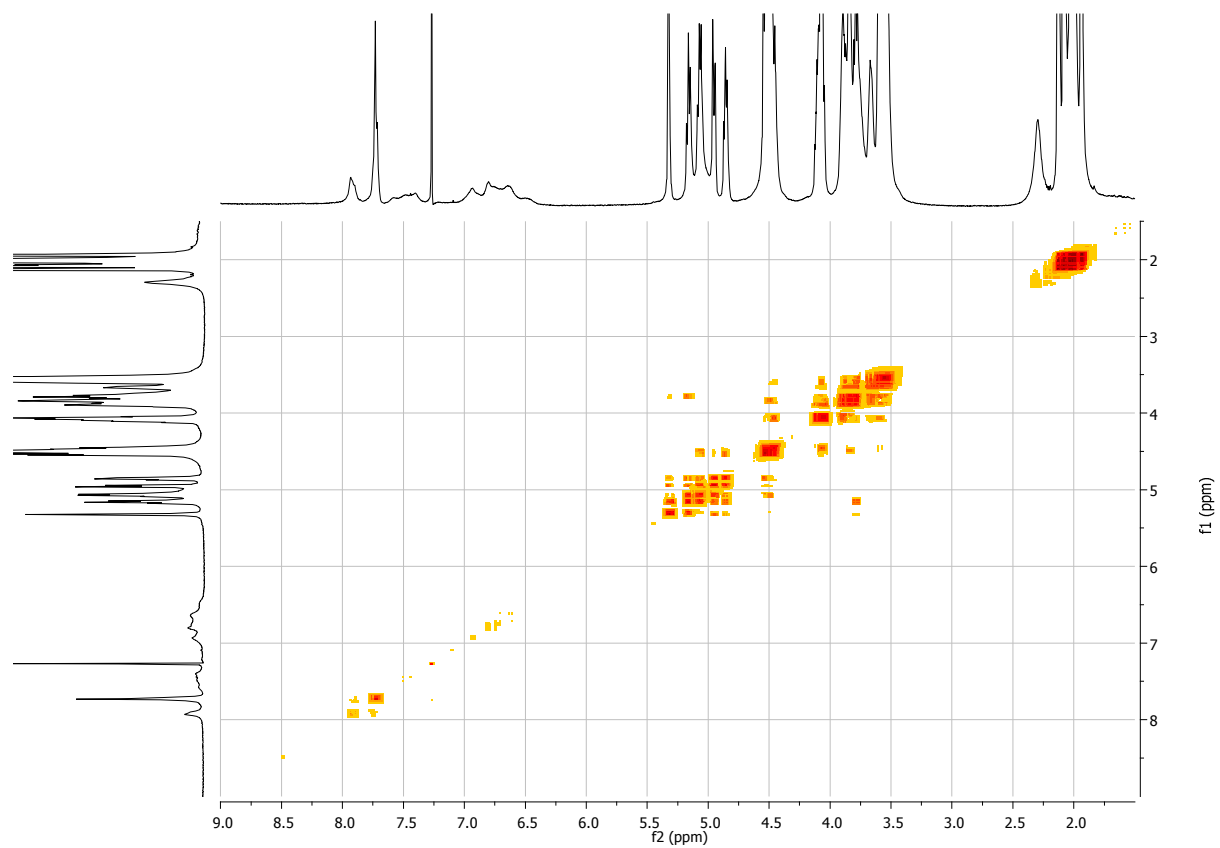

Figure S191. gCOSY spectrum of compound **40**

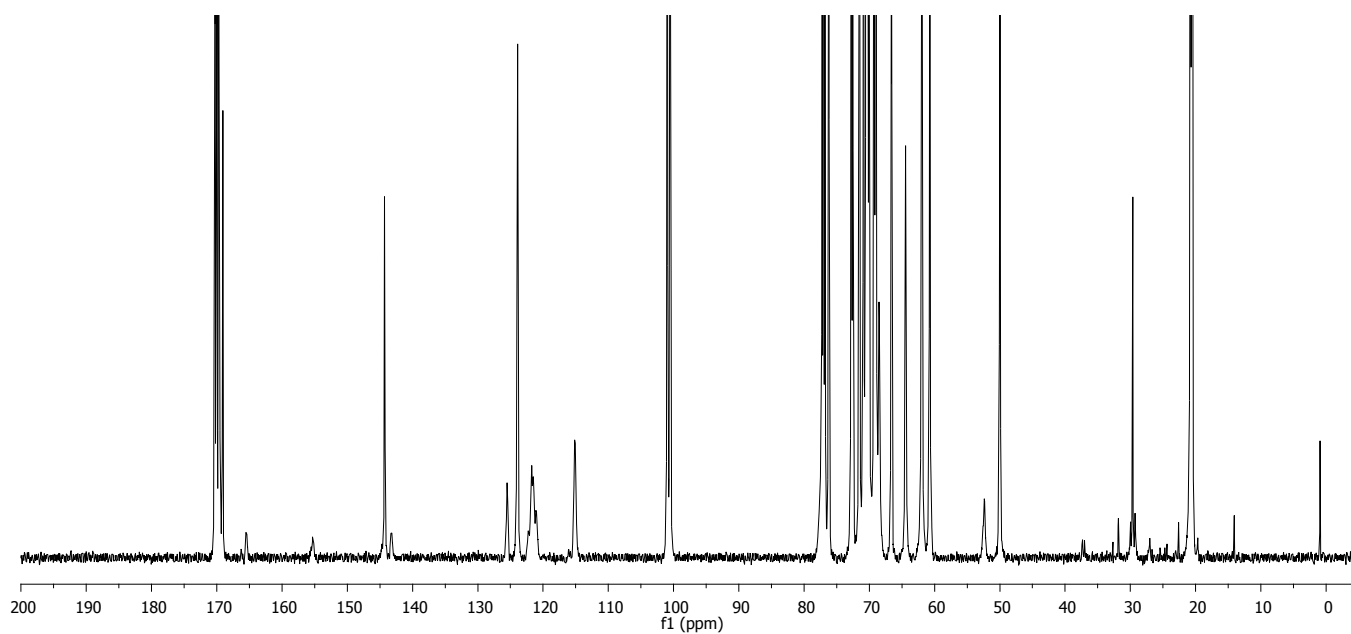

Figure S192.  $^{13}\text{C}$  NMR spectrum of compound **40** ( $\text{CDCl}_3$ , 150MHz, 60000 scans)



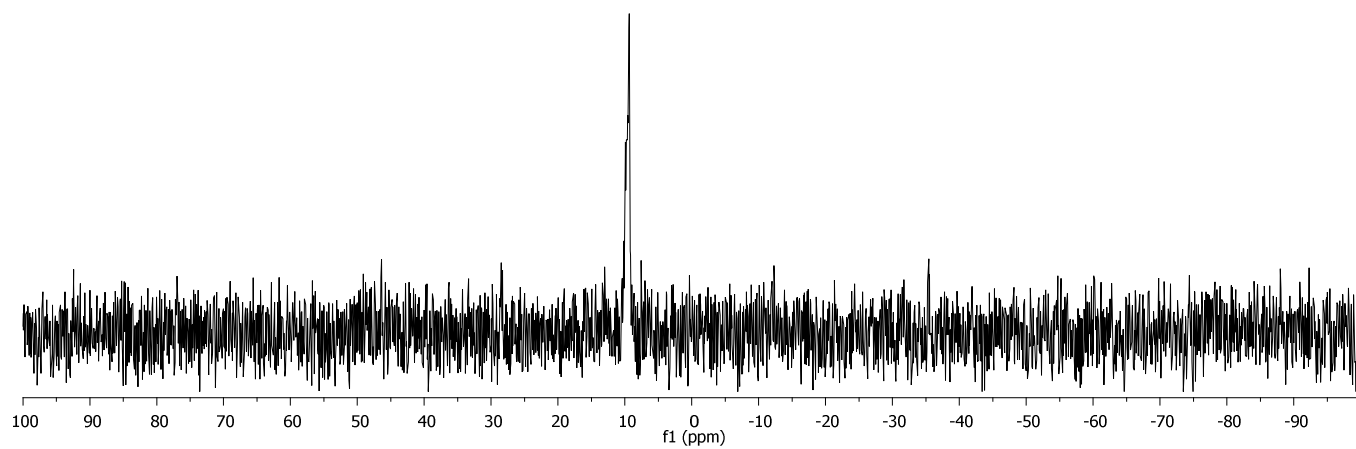

Figure S193.  $^{31}\text{P}$  NMR spectrum of compound **40** ( $\text{CDCl}_3$ , 122MHz)

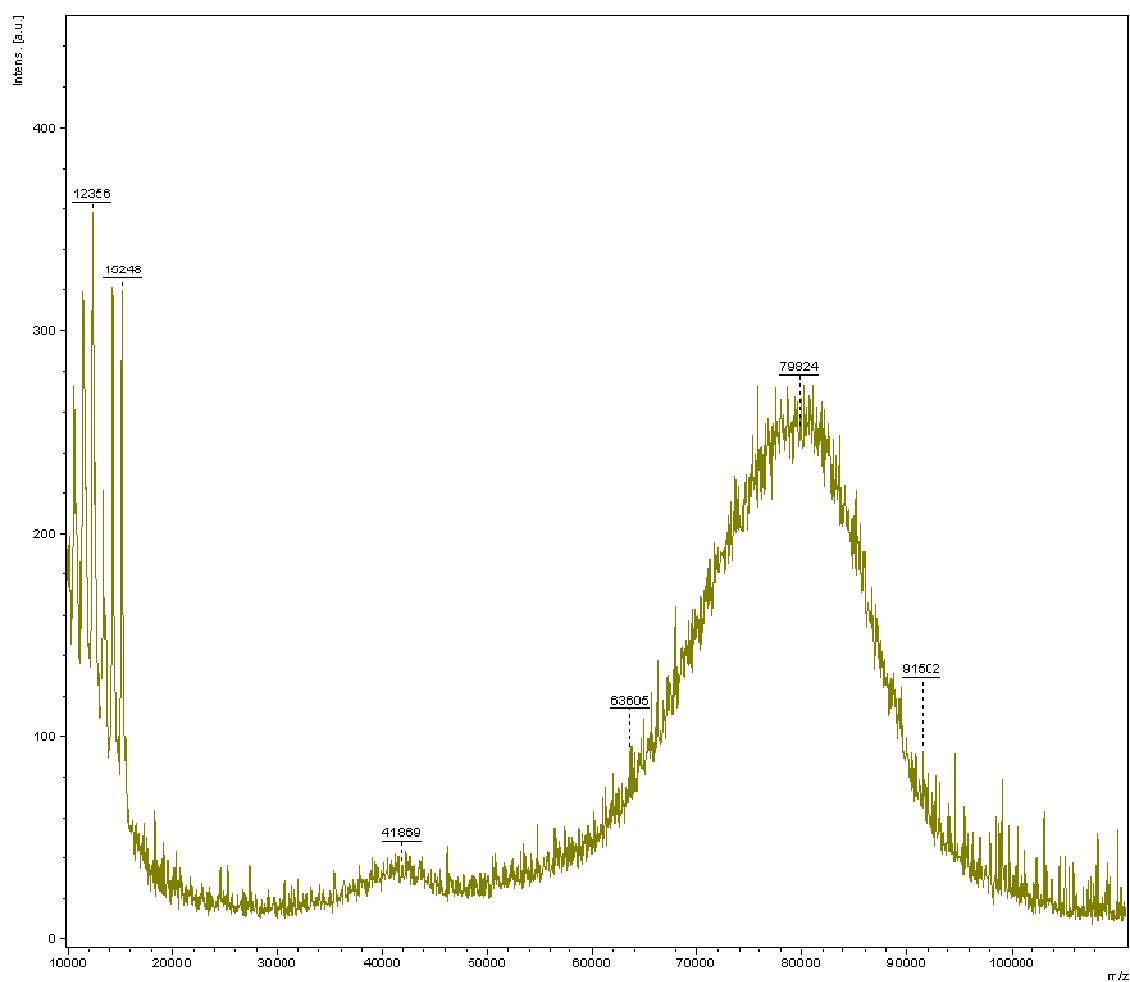

Figure S194. MALDI-TOF (DHB matrix) spectrum of compound **40**

## Hydroxylated nonacontavalent glycodendrimer **41**

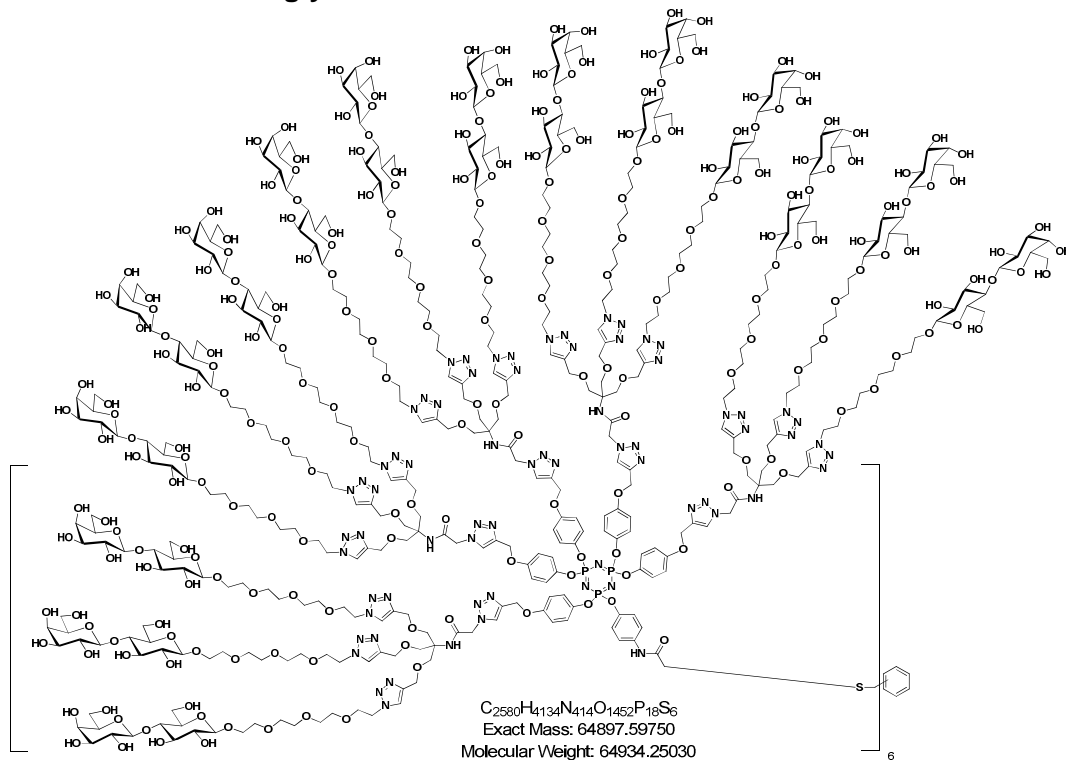

Acetylated compound **40** (22.0 mg, 0.24  $\mu\text{mol}$ ) was dissolved in dry MeOH/DCM (3+0.5 mL) and a solution of sodium methoxide (1M in MeOH, 5  $\mu\text{L}$  every 20 minutes until precipitation) was added. An additional 100  $\mu\text{L}$  was then injected and the heterogeneous reaction mixture was stirred at room temperature for 18 hours. The solvent was then removed with a Pasteur pipette and another dry mixture of MeOH/DCM (5 mL, 4:1) is added to the residual oil. A vigorous agitation is maintained for an additional 15 min. period. After removal of the solvents with a Pasteur pipette, 2 mL of dry MeOH were added to the viscous residue under agitation. After 15 min., the MeOH was removed and the residue was dissolved in 3 mL of  $\text{H}_2\text{O}$ , and the pH was adjusted to 7 with addition of ion-exchange resin (Amberlite IR 120  $\text{H}^+$ ). After filtration, the solvent was removed under *vacuum* with rotary evaporator, lyophilized to yield the fully deprotected compound **41** as a white solid (14.0 mg, 0.22  $\mu\text{mol}$ ) in an 85% yield.

$^1\text{H NMR}$  (600 MHz,  $\text{D}_2\text{O}$ ,  $\delta$  ppm): 8.15-7.89 (m, 120H,  $H_{\text{triazole}}$ ), 7.55-7.28 (br s, 12H,  $\text{CH}_b$ ), 6.84-6.77 (m, 132H,  $\text{CH}_{\text{ar}}$ ), 5.20-5.14 (m, 120H,  $\text{NHCOCH}_2\text{N}$ ,  $\text{C}_q\text{CH}_2\text{O}$ ), 4.62-4.44 (m, 540H,  $\text{CH}_2\text{N}$ ,  $\text{C}_q\text{-triazole-CH}_2\text{O}$ ), 3.62-3.55 (m, 2430,  $\text{OCH}_2\text{CH}_2\text{N}$ ,  $H_{3\text{glc}}$ ,  $H_{2\text{gal}}$ ,  $H_{3\text{gal}}$ ,  $H_{6\text{bglc}}$ ,  $H_{6\text{agal}}$ ,  $H_{6\text{bgal}}$ ,  $H_{6\text{agal}}$ ,  $H_{5\text{gal}}$ ,  $H_{5\text{glc}}$ ,  $H_{4\text{glc}}$ ,  $H_{4\text{gal}}$ ,  $\text{LacOCH}_2\text{CH}_2$ ,  $\text{OCH}_2$ ,  $\text{NHC}_q\text{CH}_2\text{O}$ ), 3.22 ( $t_{\text{app}}$ , 90H,  $H_{2\text{glc}}$ ).

$^{13}\text{C NMR}$  (150 MHz,  $\text{CDCl}_3$ ,  $\delta$  ppm): 167.1 ( $\text{C}_{\text{ext}}\text{ONH}$ ), 165.0 ( $\text{C}_{\text{int}}\text{ONH}$ ) (*not visible*), 155.8-155.7 ( $2\times\text{C}_a$ ), 144.6 ( $\text{C}_d$ ), 143.7 ( $\text{C}_{\text{triazole}}=\text{CH}$ ), 136.2 ( $\text{C}_{\text{ar-core}}$ ) (*not visible*), 127.0 ( $\text{C}_{\text{triazole}}=\text{CH}$ ), 125.9 ( $\text{C}_{\text{triazole}}=\text{CH}$ ), 122.4 ( $\text{C}_c$ ), 116.3 ( $\text{C}_b$ ), 103.6 ( $\text{C}_{1\text{gal}}$ ), 102.8 ( $\text{C}_{1\text{glc}}$ ), 79.1 ( $\text{C}_{4\text{glc}}$ ), 76.0 ( $\text{C}_{3\text{glc}}$ ), 75.4 ( $\text{C}_{5\text{glc}}$ ), 75.0 ( $\text{C}_{5\text{gal}}$ ), 73.5 ( $\text{C}_{2\text{glc}}$ ), 73.2 ( $\text{C}_{3\text{gal}}$ ), 71.6 ( $\text{C}_{2\text{gal}}$ ), 70.3, 70.2, 70.2, 70.2, 70.1 ( $\text{OCH}_2$ ), 69.3 ( $\text{C}_{4\text{gal}}$ ), 69.2 ( $\text{OCH}_2$ ), 68.1 ( $\text{C}_q\text{CH}_2\text{O}$ ), 64.2 ( $\text{OCH}_2\text{C}=\text{C}$ ), 62.0 ( $\text{C}_q$ ) (*not visible*), 61.7

(C<sub>6glc</sub>), 60.9 (C<sub>6gal</sub>), 60.8 (OCH<sub>2</sub>), 53.0 (N<sub>triazole</sub>CH<sub>2</sub>CO), 50.6 (CH<sub>2</sub>N), 37.8 (SCH<sub>2</sub>CONH) (*not visible*), 31.2 (C<sub>ar</sub>.CH<sub>2</sub>S) (*not visible*).

<sup>31</sup>P NMR (122 MHz, D<sub>2</sub>O, δ ppm): 10.7-9.5 (m, 18P).

*m/z* (MALDI-TOF/DHB matrix) for C<sub>2580</sub>H<sub>4134</sub>N<sub>414</sub>O<sub>1452</sub>P<sub>18</sub>S<sub>6</sub> = 64934.3, found 56530-centered Gaussian.

NMR diffusion studies (D<sub>2</sub>O): *D* = 0.60×10<sup>-10</sup> m<sup>2</sup>/s; *d<sub>s</sub>* = 6.6 nm

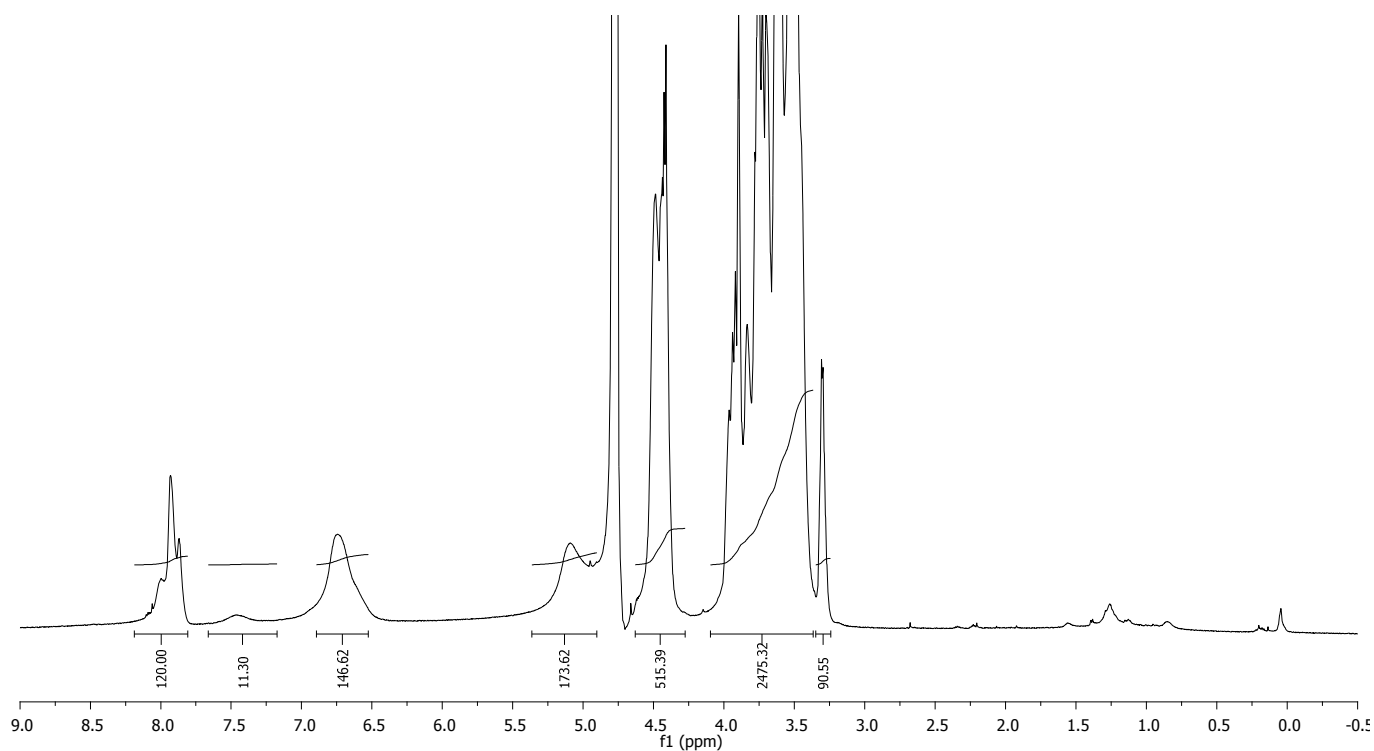

Figure S195. <sup>1</sup>H NMR spectrum of compound 41 (D<sub>2</sub>O, 600MHz)

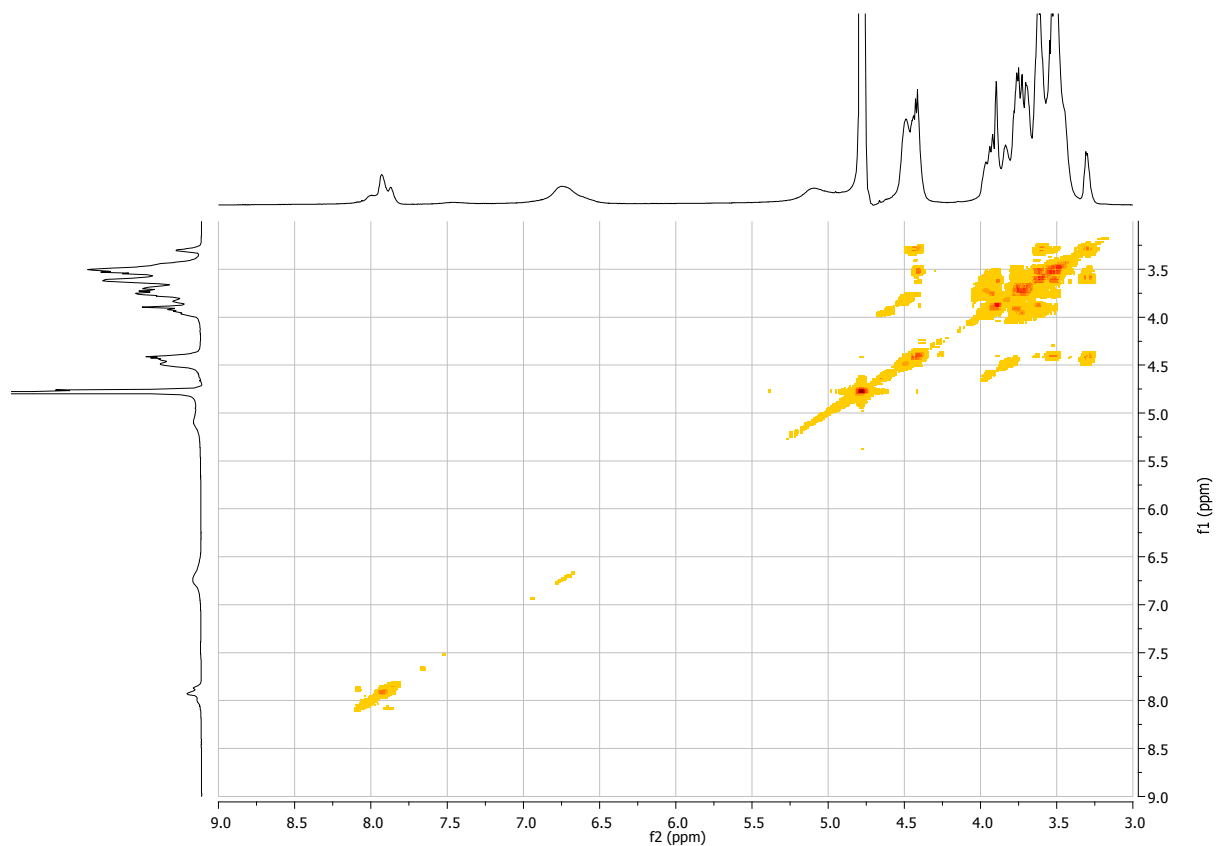

Figure S196. gCOSY spectrum of compound **41**

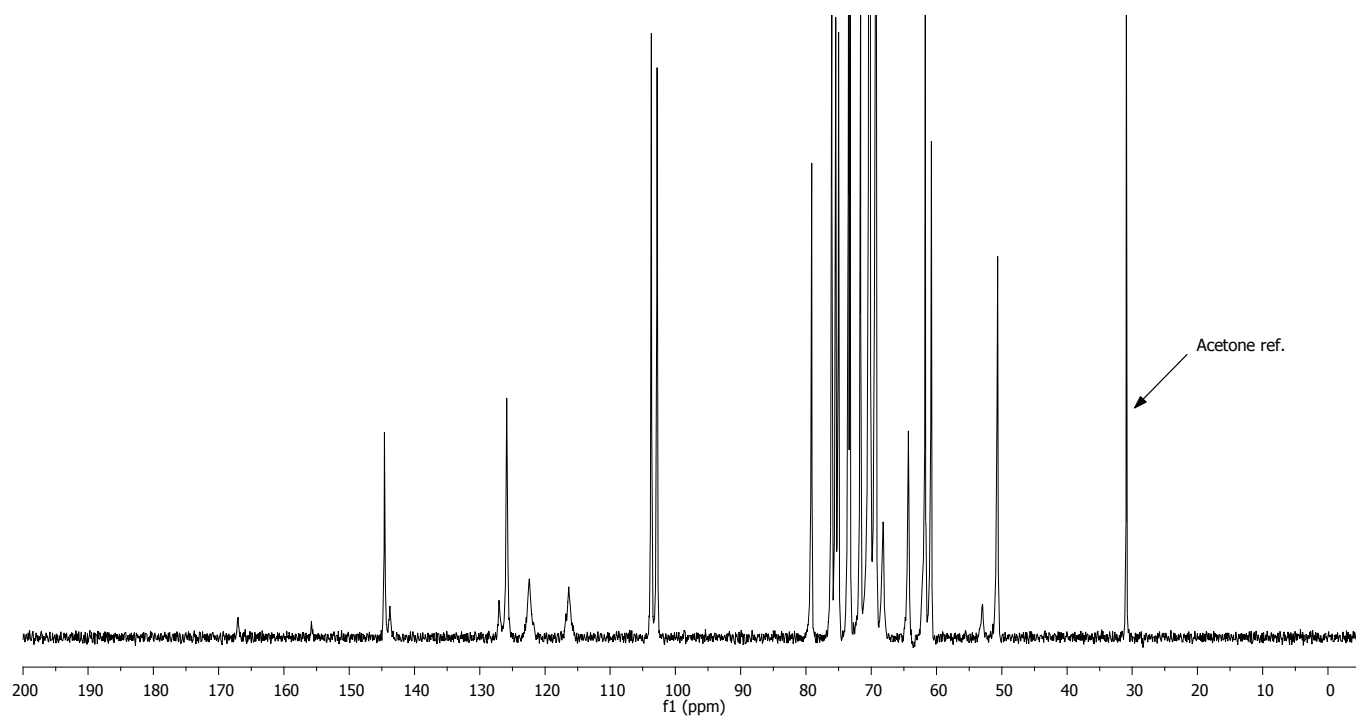

Figure S197.  $^{13}\text{C}$  NMR spectrum of compound **41** ( $\text{D}_2\text{O}$ , 150MHz, acetone as reference, 81000 scans)

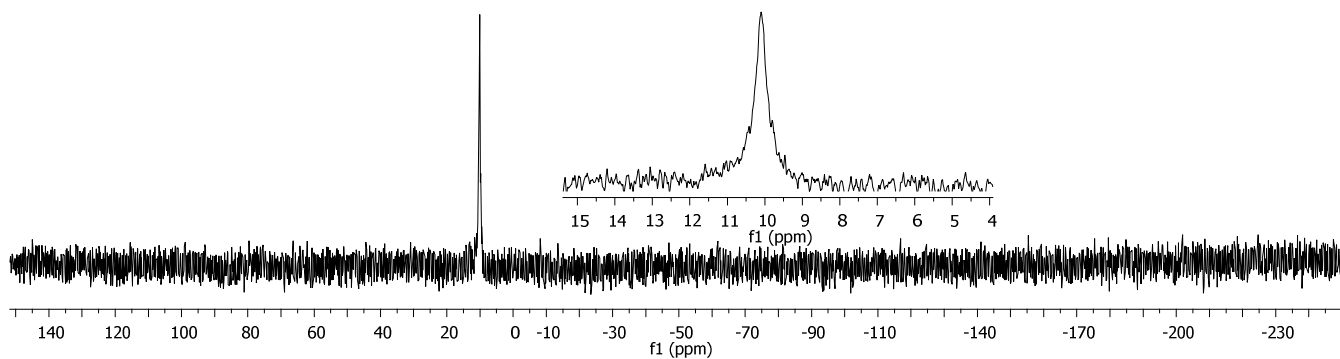

**Figure S198.**  $^{31}\text{P}$  NMR spectrum of compound **41** ( $\text{D}_2\text{O}$ , 122MHz)

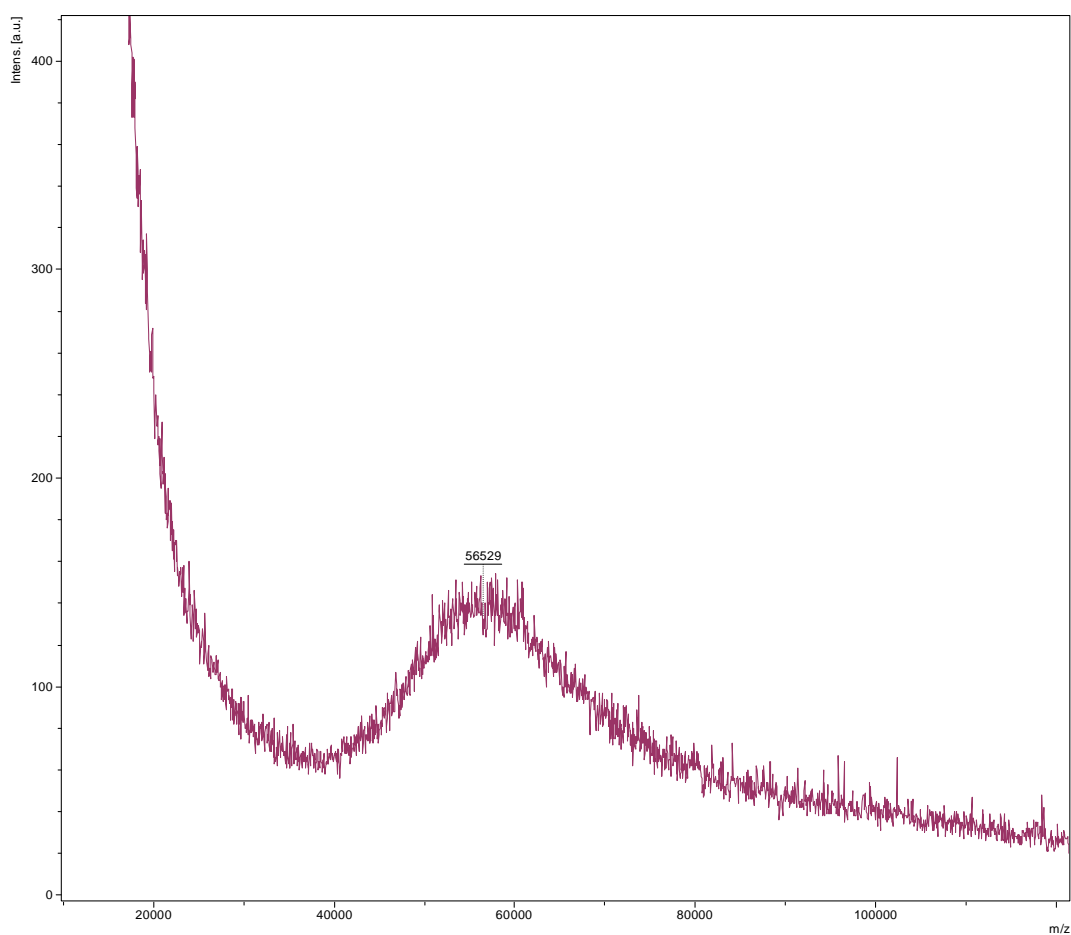

**Figure S199.** MALDI-TOF (DHB matrix) spectrum of compound **41**

## Synthesis of monomeric reference 43

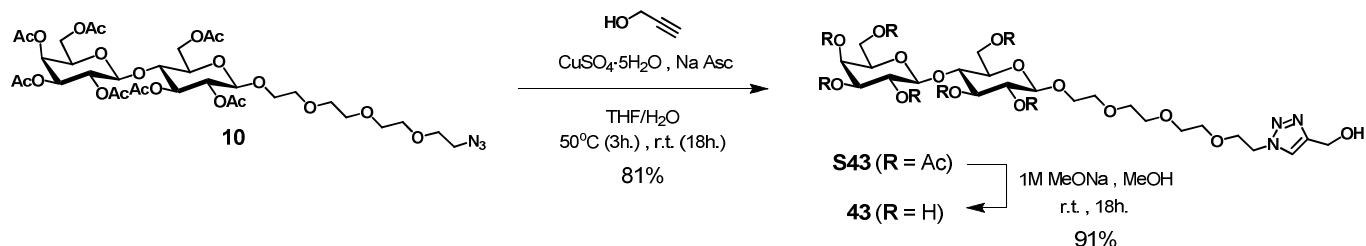

To a solution of 2-(2-{2-[2-(2-azido-ethoxy)-ethoxy]-ethoxy}-ethyl) 2,3,4,6-tetra-*O*-acetyl-β-D-galactopyranosyl-(1→4)-2,3,6-tri-*O*-acetyl-β-D-glucopyranoside **10**<sup>1</sup> (100.0 mg, 119.3 μmol, 1.0 eq.) in a 1:1 mixture of H<sub>2</sub>O/THF<sub>anh</sub> (5 mL), were added propargyl alcohol (28.1 mg, 29.1 μL, 501.3 μmol, 4.2 eq.), CuSO<sub>4</sub>·5H<sub>2</sub>O (14.9 mg, 59.7 μmol, 0.5 eq.) and sodium ascorbate (11.8 mg, 59.7 μmol, 0.5 eq.). While stirring, the mixture was first heated at 50°C for 3 hours in a 20 mL vial and at room temperature for additional 18 hours. Ethyl acetate (15 mL) was added and the solution was poured into a separatory funnel containing ethyl acetate (10 mL), washed with saturated aqueous NH<sub>4</sub>Cl (2×10 mL), water (10 mL) and brine (5 mL). Organics were collected, dried over Na<sub>2</sub>SO<sub>4</sub> and concentrated to dryness *in vacuo* with rotary evaporator. Purification by flash chromatography (SiO<sub>2</sub>, DCM/MeOH 100:0 to 92:8) afforded desired compound **S43** (86.0 mg, 96.6 μmol, **81%**) as a white foam.

R<sub>f</sub> = 0.30, DCM/MeOH 94:6

<sup>1</sup>H NMR (600 MHz, CDCl<sub>3</sub>, δ ppm): 7.75 (s, 1H, H<sub>triazole</sub>), 5.29 (d<sub>app</sub>, 1H, H<sub>4gal</sub>), 5.14 (dd, <sup>3</sup>J<sub>4,3</sub> = 9.4 Hz, <sup>3</sup>J<sub>3,2</sub> = 9.1 Hz, 1H, H<sub>3glc</sub>), 5.05 (dd, <sup>3</sup>J<sub>2,1</sub> = 10.5 Hz, <sup>3</sup>J<sub>3,2</sub> = 8.0 Hz, 1H, H<sub>2gal</sub>), 4.93 (dd, <sup>3</sup>J<sub>2,3</sub> = 10.5 Hz, <sup>3</sup>J<sub>3,4</sub> = 3.4 Hz, 1H, H<sub>3gal</sub>), 4.83 (dd, <sup>3</sup>J<sub>2,1</sub> = 9.4 Hz, <sup>3</sup>J<sub>3,2</sub> = 8.0 Hz, 1H, H<sub>2glc</sub>), 4.73 (br s, 2H, CH<sub>2</sub>OH), 4.53 (d, <sup>3</sup>J<sub>1,2</sub> = 9.4 Hz, 1H, H<sub>1glc</sub>), 4.50 (t<sub>app</sub>, 2H, CH<sub>2</sub>N), 4.48 (dd, <sup>2</sup>J<sub>6a,6b</sub> = 12.0 Hz, <sup>3</sup>J<sub>5,6a</sub> = 2.1 Hz, 1H, H<sub>6aglc</sub>), 4.47 (d, <sup>3</sup>J<sub>1,2</sub> = 7.9 Hz, 1H, H<sub>1gal</sub>), 4.12-4.00 (m, 3H, H<sub>6bglc</sub>, H<sub>6agal</sub>, H<sub>6bgal</sub>), 3.90-3.52 (m, 17H, OCH<sub>2</sub>, H<sub>4glc</sub>, H<sub>5gal</sub>, H<sub>5glc</sub>), 3.30 (br s, 1H, OH), 2.15 (s, 3H, COCH<sub>3</sub>), 2.12 (s, 3H, COCH<sub>3</sub>), 2.06 (s, 3H, COCH<sub>3</sub>), 2.04 (3s, 9H, 3×COCH<sub>3</sub>), 1.96 (s, 3H, COCH<sub>3</sub>).

<sup>13</sup>C NMR (150 MHz, CDCl<sub>3</sub>, δ ppm): 170.3, 170.2, 170.0, 169.9, 169.7, 169.6, 169.0 (7xs, COCH<sub>3</sub>), 147.7 (C<sub>q</sub> triazole), 122.9 (CH<sub>triazole</sub>), 100.9 (C<sub>1gal</sub>), 100.4 (C<sub>1glc</sub>), 76.6 (C<sub>4glc</sub>), 72.6 (C<sub>3glc</sub>), 72.5 (C<sub>5glc</sub>), 71.5 (C<sub>2glc</sub>), 70.8 (C<sub>3gal</sub>), 70.5 (C<sub>5gal</sub>), 70.3, 70.3, 70.2, 70.2 (OCH<sub>2</sub>), 69.3 (C<sub>2gal</sub>), 69.0, 68.9 (OCH<sub>2</sub>), 66.5 (C<sub>4gal</sub>), 61.8 (C<sub>6glc</sub>), 60.7 (C<sub>6gal</sub>), 56.3 (CH<sub>2</sub>OH), 50.0 (CH<sub>2</sub>N), 20.8, 20.8, 20.7, 20.6, 20.6, 20.5 (7xs, COCH<sub>3</sub>).

*m/z* (ESI<sup>+</sup>-HRMS) for C<sub>37</sub>H<sub>55</sub>N<sub>3</sub>O<sub>22</sub> = 894.3350 [M+H]<sup>+</sup>; found 894.3361 ; 916.3169 [M+Na]<sup>+</sup>; found 916.3181.

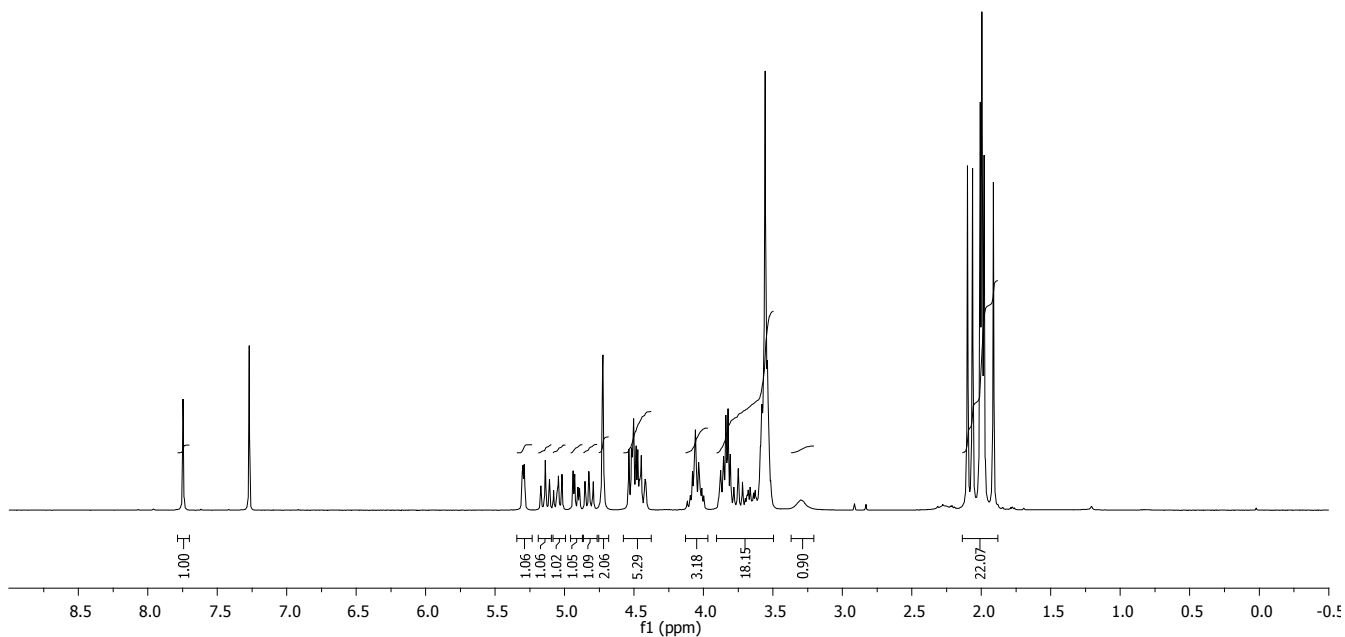

Figure S200.  $^1\text{H}$  NMR spectrum of compound **S43** ( $\text{CDCl}_3$ , 600MHz)

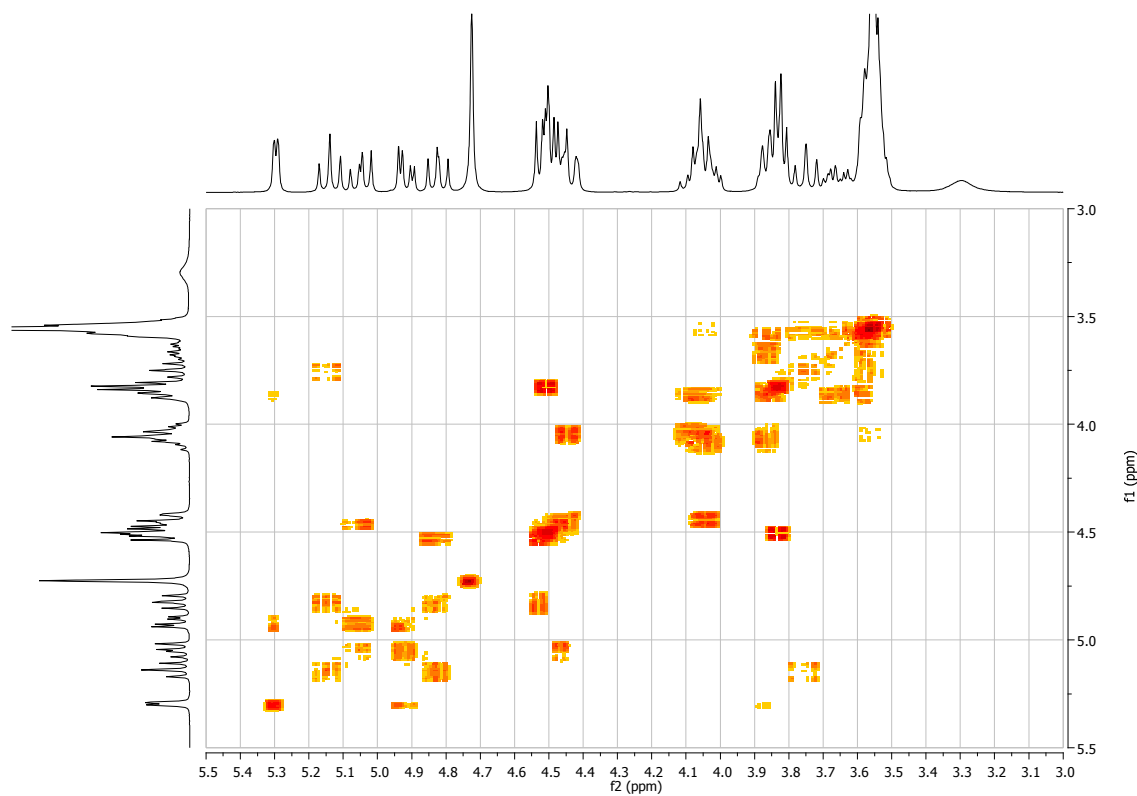

Figure S201. gCOSY spectrum of compound **S43**

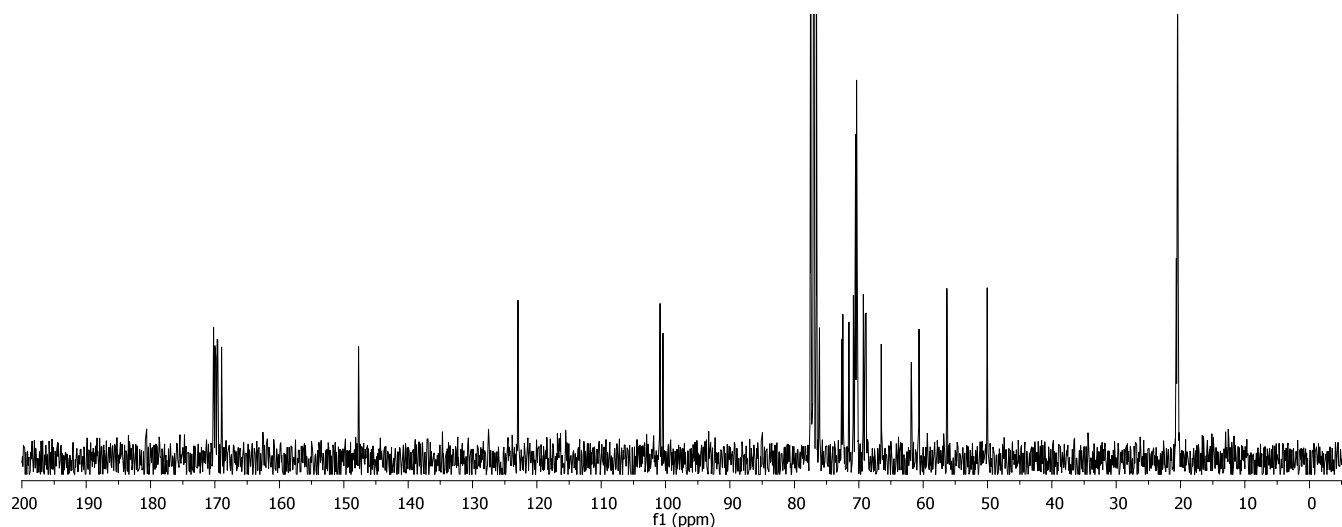

Figure S202.  $^{13}\text{C}$  NMR spectrum of compound **S43** ( $\text{CDCl}_3$ , 150MHz)

MS Spectrum

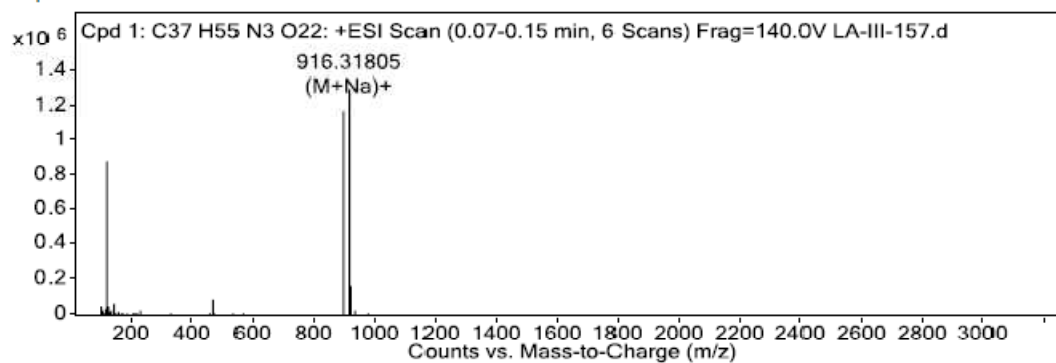

MS Zoomed Spectrum

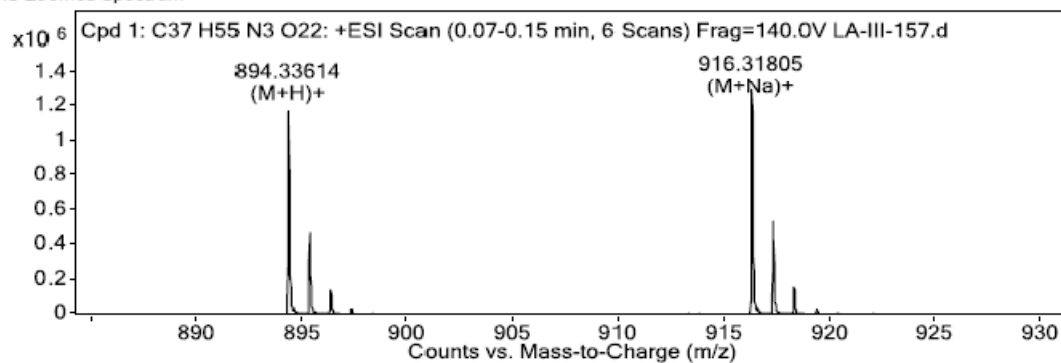

MS Spectrum Peak List

| Ion     | Formula                                               | Abund      | Observed m/z | Calc m/z  | Diff (ppm) |
|---------|-------------------------------------------------------|------------|--------------|-----------|------------|
| (M+H)+  | $\text{C}_{37}\text{H}_{56}\text{N}_3\text{O}_{22}$   | 1193152.62 | 894.33614    | 894.335   | 1.27       |
| (M+Na)+ | $\text{C}_{37}\text{H}_{55}\text{N}_3\text{NaO}_{22}$ | 1308225.57 | 916.31805    | 916.31694 | 1.21       |

Figure S203. ESI<sup>+</sup>-HRMS spectrum of compound **S43**



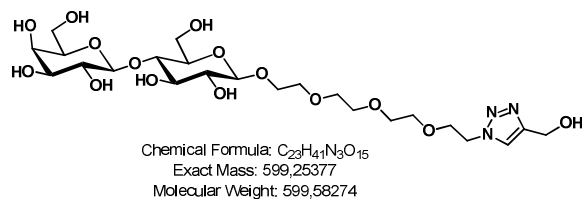

Acetylated compound **S43** (86.0 mg, 96.2  $\mu$ mol) was dissolved in dry MeOH (4 mL) and a solution of sodium methoxide (1M in MeOH, 150  $\mu$ L) was added. The reaction mixture was stirred at room temperature for 24 hours. The pH was adjusted to 7 with addition of ion-exchange resin (Amberlite IR 120 H<sup>+</sup>). After filtration, the solvent was removed under *vacuum* with rotary evaporator, lyophilized to yield the fully deprotected reference **43** as a white solid (52.5 mg, 87.6  $\mu$ mol, **91%**).

**<sup>1</sup>H NMR** (300 MHz, D<sub>2</sub>O,  $\delta$  ppm): 8.03 (s, 1H,  $H_{\text{triazole}}$ ), 4.73 (s, 2H,  $\text{OCH}_2\text{C}_{\text{triazole}}$ ), 4.64 (t,  $J = 5.0$  Hz, 2H,  $\text{CH}_2\text{N}$ ), 4.52 (d,  $J = 7.9$  Hz, 1H,  $H_{1\text{glc}}$ ), 4.46 (d,  $J = 7.7$  Hz, 1H,  $H_{1\text{gal}}$ ), 4.08-3.53 (m, 25H,  $\text{OCH}_2\text{CH}_2\text{N}$ ,  $\text{OCH}_2$ ,  $H_{3\text{glc}}$ ,  $H_{2\text{gal}}$ ,  $H_{3\text{gal}}$ ,  $H_{6\text{bglc}}$ ,  $H_{4\text{gal}}$ ,  $H_{6\text{agal}}$ ,  $H_{6\text{bgal}}$ ,  $H_{6\text{aglc}}$ ,  $H_{5\text{gal}}$ ,  $H_{5\text{glc}}$ ,  $H_{4\text{glc}}$ ), 3.36 (m, 6H,  $H_{2\text{glc}}$ ).

**<sup>13</sup>C NMR** (75 MHz, D<sub>2</sub>O,  $\delta$  ppm): 147.5 ( $\text{C}_{\text{triazole}=\text{CH}}$ ), 125.1 ( $\text{C}_{\text{triazole}=\text{CH}}$ ), 103.6 ( $\text{C}_{1\text{gal}}$ ), 102.7 ( $\text{C}_{1\text{glc}}$ ), 79.0 ( $\text{C}_{4\text{glc}}$ ), 76.0 ( $\text{C}_{3\text{glc}}$ ), 75.4 ( $\text{C}_{5\text{glc}}$ ), 75.0 ( $\text{C}_{5\text{gal}}$ ), 73.5 ( $\text{C}_{2\text{glc}}$ ), 73.2 ( $\text{C}_{3\text{gal}}$ ), 71.6 ( $\text{C}_{2\text{gal}}$ ), 70.3, 70.2, 70.1, 70.1, 69.4, ( $\text{OCH}_2$ ), 69.2 ( $\text{C}_{4\text{gal}}$ ), 61.7 ( $\text{C}_{6\text{glc}}$ ), 60.7 ( $\text{C}_{6\text{gal}}$ ), 55.3 ( $\text{OCH}_2\text{C}_{\text{triazole}}$ ), 50.7 ( $\text{NCH}_2$ ).

$m/z$  (ESI<sup>+</sup>-HRMS) for C<sub>23</sub>H<sub>41</sub>N<sub>3</sub>O<sub>15</sub> = 600.2610 [ $M+H$ ]<sup>+</sup>; found 600.2618 ; 622.2430 [ $M+Na$ ]<sup>+</sup>; found 622.2438.

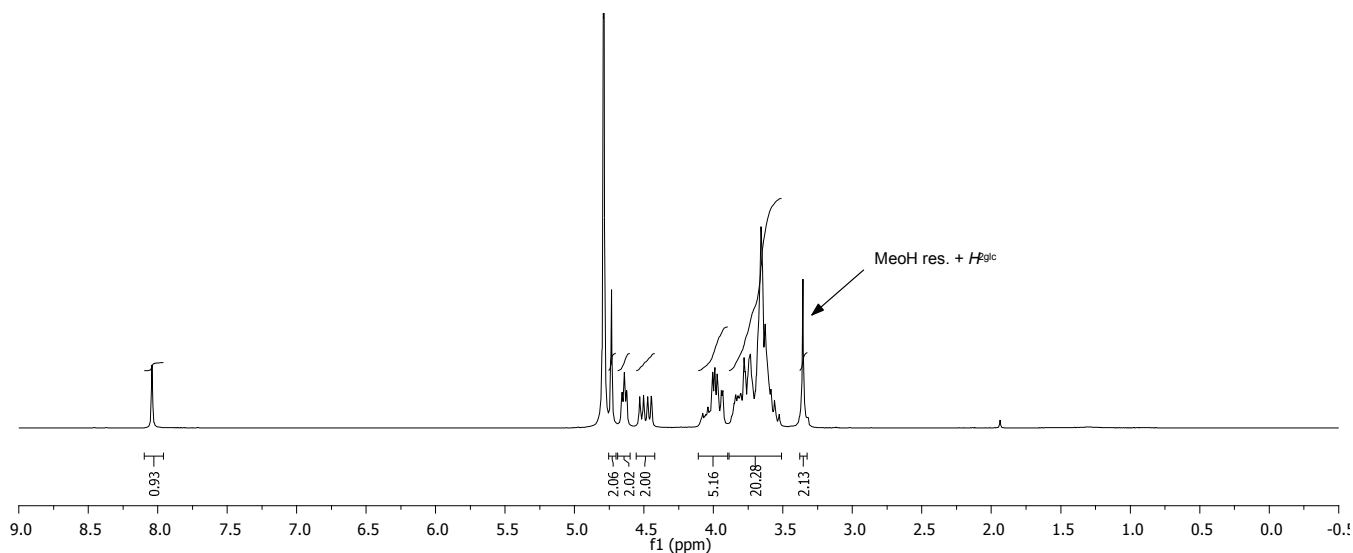

**Figure S204.** <sup>1</sup>H NMR spectrum of compound **43** (D<sub>2</sub>O, 300MHz)

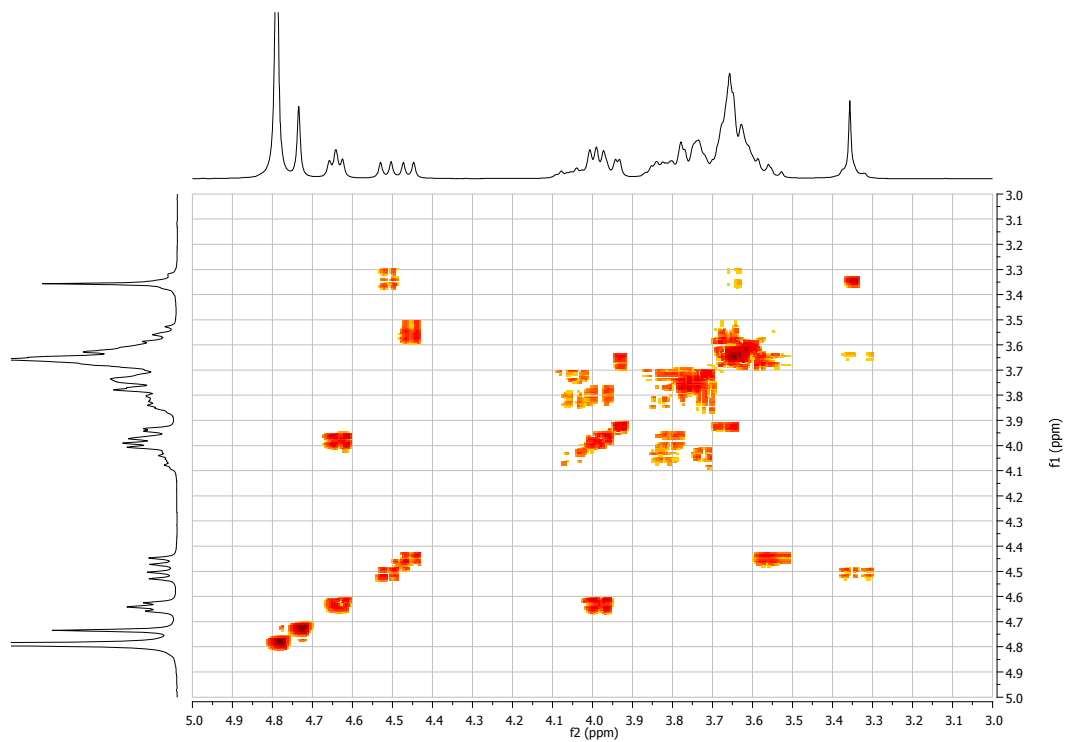

Figure S205. gCOSY spectrum of compound **43**

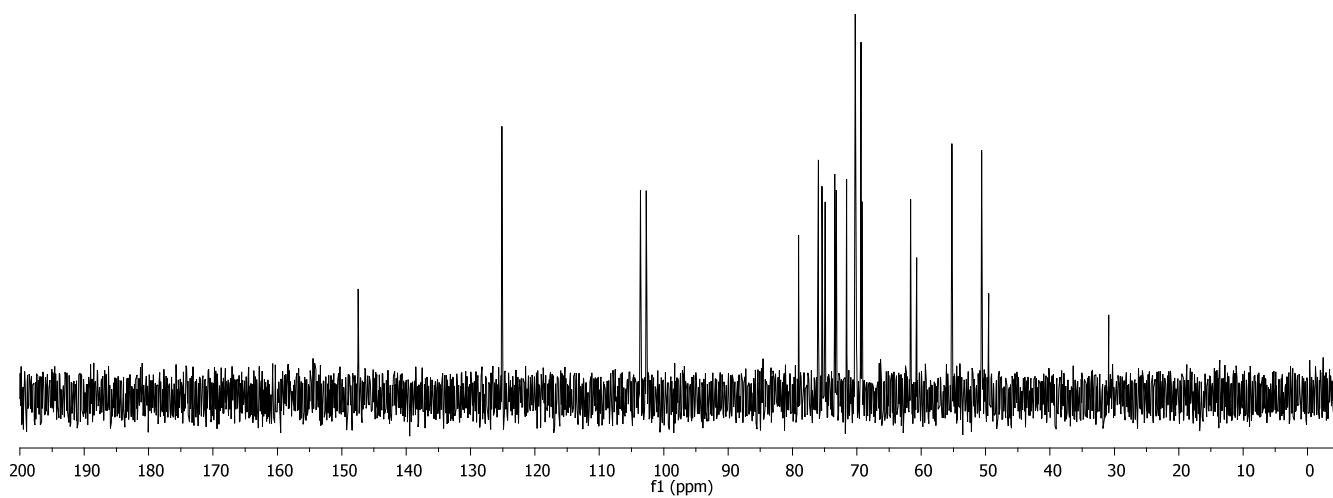

Figure S206.  $^{13}\text{C}$  NMR spectrum of compound **43** ( $\text{D}_2\text{O}$ , 75MHz)

MS Spectrum

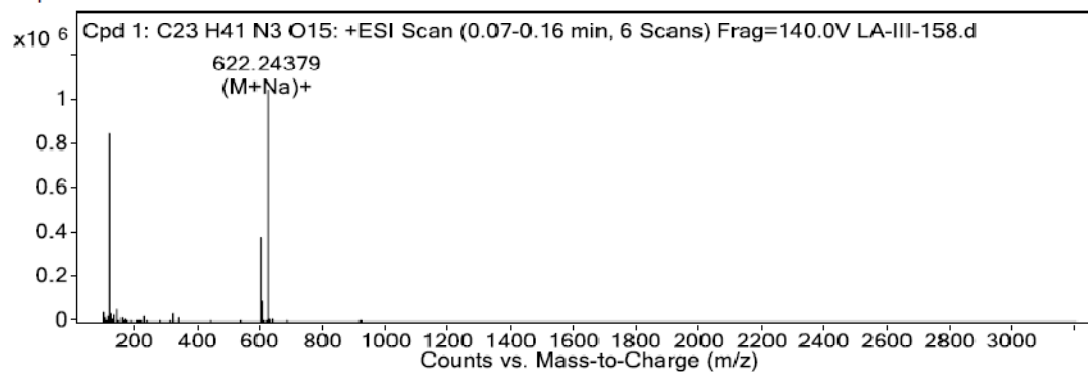

MS Zoomed Spectrum

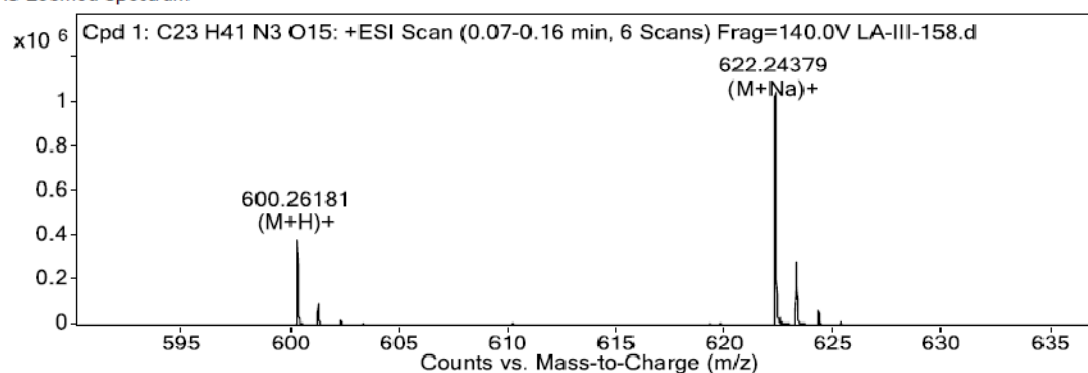

MS Spectrum Peak List

| Ion                 | Formula                                                          | Abund      | Observed m/z | Calc m/z  | Diff (ppm) |
|---------------------|------------------------------------------------------------------|------------|--------------|-----------|------------|
| (M+H) <sup>+</sup>  | C <sub>23</sub> H <sub>42</sub> N <sub>3</sub> O <sub>15</sub>   | 393220.81  | 600.26181    | 600.26104 | 1.28       |
| (M+Na) <sup>+</sup> | C <sub>23</sub> H <sub>41</sub> N <sub>3</sub> NaO <sub>15</sub> | 1074960.28 | 622.24379    | 622.24299 | 1.28       |

Figure S207. ESI<sup>+</sup>-HRMS spectrum of compound 43

## Synthesis of monomeric reference lacking PEG chain **44**

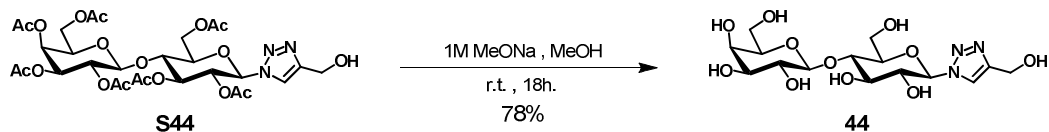

Acetylated compound **S44**<sup>7</sup> (100.0 mg, 139.0  $\mu\text{mol}$ ) was dissolved in dry MeOH (4 mL) and a solution of sodium methoxide (1M in MeOH, 150  $\mu\text{L}$ ) was added. The reaction mixture was stirred at room temperature for 24 hours. The pH was adjusted to 7 with addition of ion-exchange resin (Amberlite IR 120 H<sup>+</sup>). After filtration, the solvent was removed under *vacuum* with rotary evaporator, lyophilized to yield the fully deprotected reference **44** as a white solid (45.6 mg, 108.0  $\mu\text{mol}$ , **78%**).

<sup>1</sup>H NMR (300 MHz, D<sub>2</sub>O,  $\delta$  ppm): 8.19 (s, 1H,  $H_{\text{triazole}}$ ), 5.76 (d,  $J = 9.2$  Hz, 1H,  $H_{1\text{glc}}$ ), 4.72 (s, 2H,  $\text{CH}_2\text{OH}$ ), 4.48 (d,  $J = 7.8$  Hz, 1H,  $H_{1\text{gal}}$ ), 4.04 (t<sub>app</sub>, 1H,  $H_{2\text{glc}}$ ), 3.95–3.64 (m, 10H,  $H_{3\text{glc}}$ ,  $H_{3\text{gal}}$ ,  $H_{4\text{glc}}$ ,  $H_{4\text{gal}}$ ,  $H_{5\text{glc}}$ ,  $H_{5\text{gal}}$ ,  $H_{6\text{glc}}$ ,  $H_{6\text{gal}}$ ), 3.54 (dd,  $J = 7.7$  Hz,  $J = 7.8$  Hz, 2H,  $H_{2\text{gal}}$ ).

<sup>13</sup>C NMR (75 MHz, D<sub>2</sub>O,  $\delta$  ppm): 148.2 ( $C_{\text{triazole}}$ ), 120.2 ( $\text{CH}_{\text{triazole}}$ ), 101.1 ( $C_{1\text{gal}}$ ), 85.5 ( $C_{1\text{glc}}$ ), 75.9 ( $C_{4\text{glc}}$ ), 75.5 ( $C_{3\text{glc}}$ ), 72.5 ( $C_{5\text{glc}}$ ), 70.9 ( $C_{2\text{glc}}$ ), 70.8 ( $C_{3\text{gal}}$ ), 70.5 ( $C_{5\text{gal}}$ ), 69.0 ( $C_{2\text{gal}}$ ), 66.5 ( $C_{4\text{gal}}$ ), 61.7 ( $C_{6\text{gal}}$ ), 60.8 ( $C_{6\text{glc}}$ ), 56.3 ( $\text{CH}_2\text{OH}$ ).

$m/z$  (ESI<sup>+</sup> HRMS) for C<sub>15</sub>H<sub>25</sub>N<sub>3</sub>O<sub>11</sub> = 424.1562 [ $M+\text{H}$ ]<sup>+</sup>, found: 424.1556; 446.1381 [ $M+\text{Na}$ ]<sup>+</sup>, found: 446.1372.

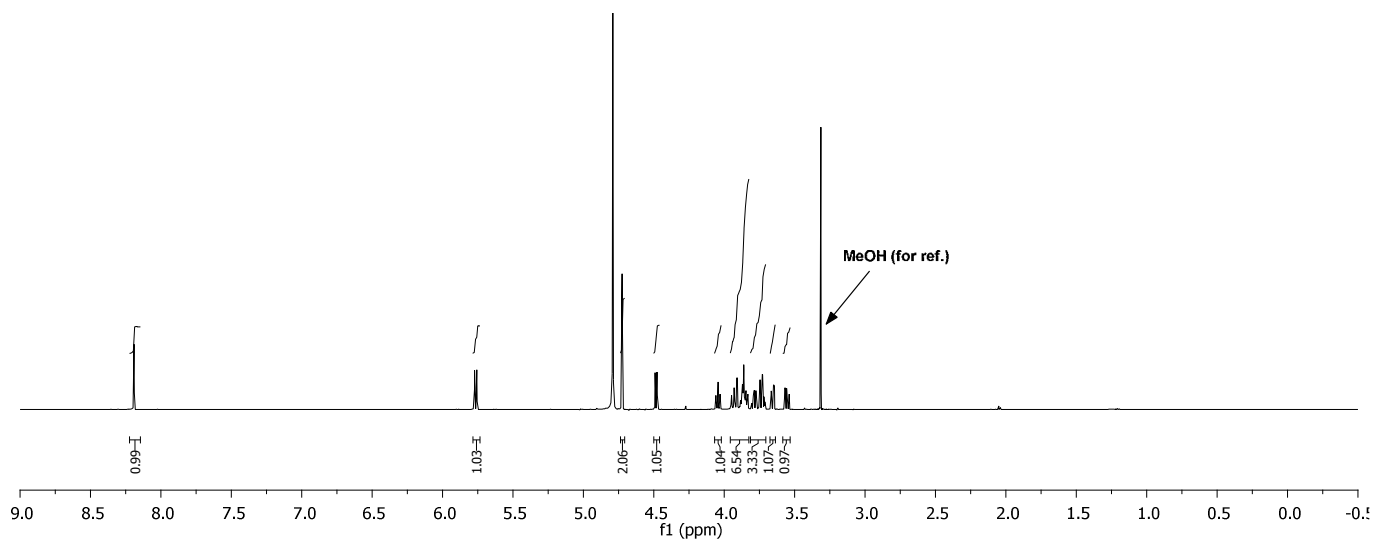

**Figure S208.** <sup>1</sup>H NMR spectrum of compound **44** (D<sub>2</sub>O, 600MHz)

<sup>7</sup> R. Kumar, P. R. Maulik and A. K. Misra, *Glycoconj. J.* 2008, **25**, 595–602.

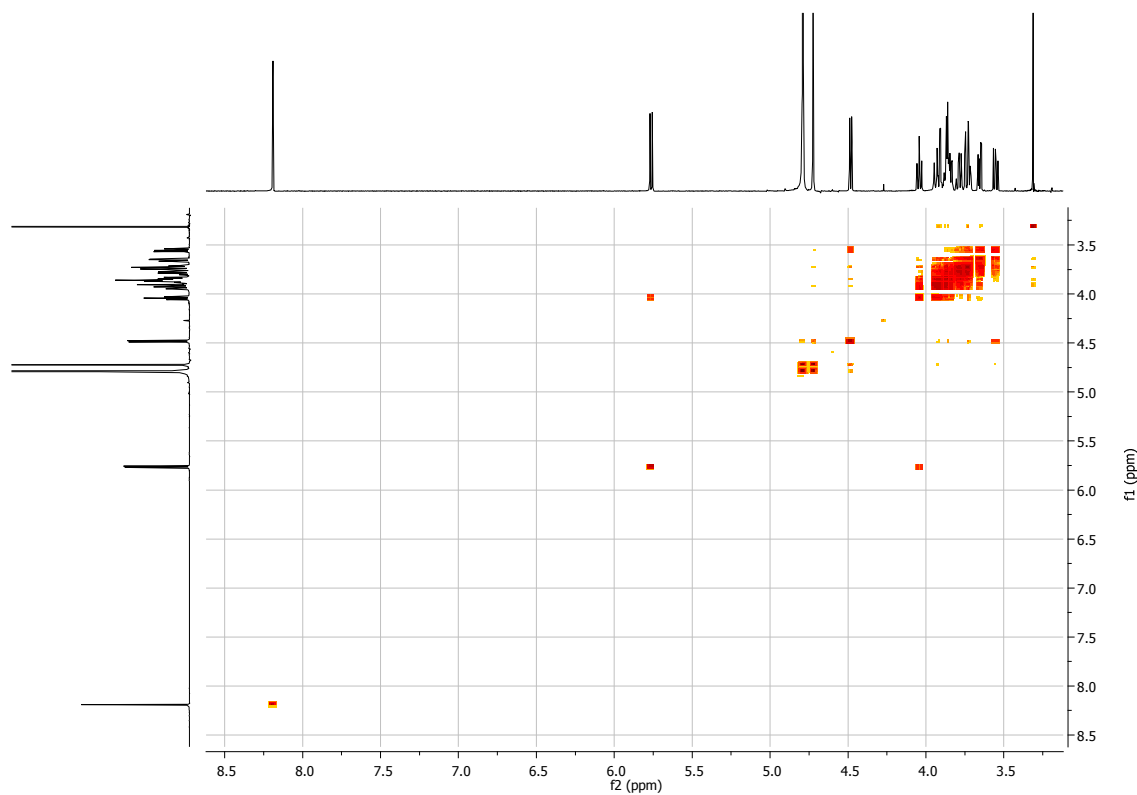

Figure S209. gCOSY spectrum of compound **44**

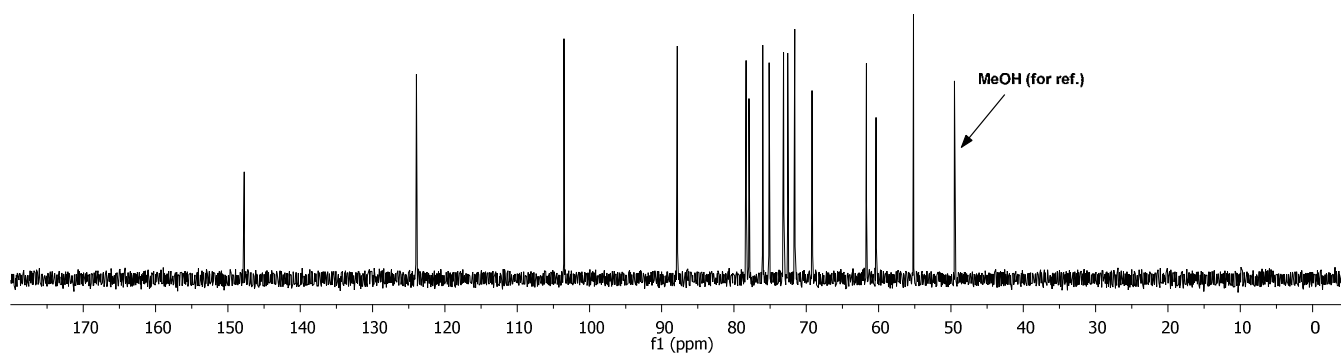

Figure S210.  $^{13}\text{C}$  NMR spectrum of compound **44** ( $\text{D}_2\text{O}$ , 150MHz)

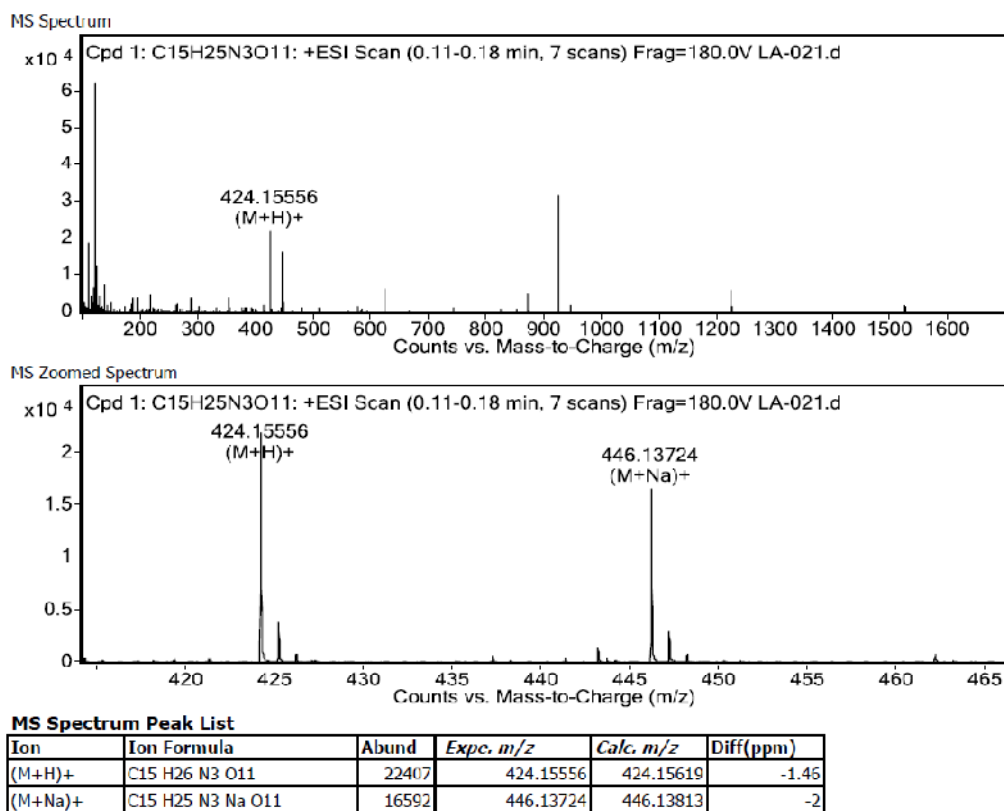

Figure S211. ESI<sup>+</sup>-HRMS spectrum of compound **44**

## Negative control 45

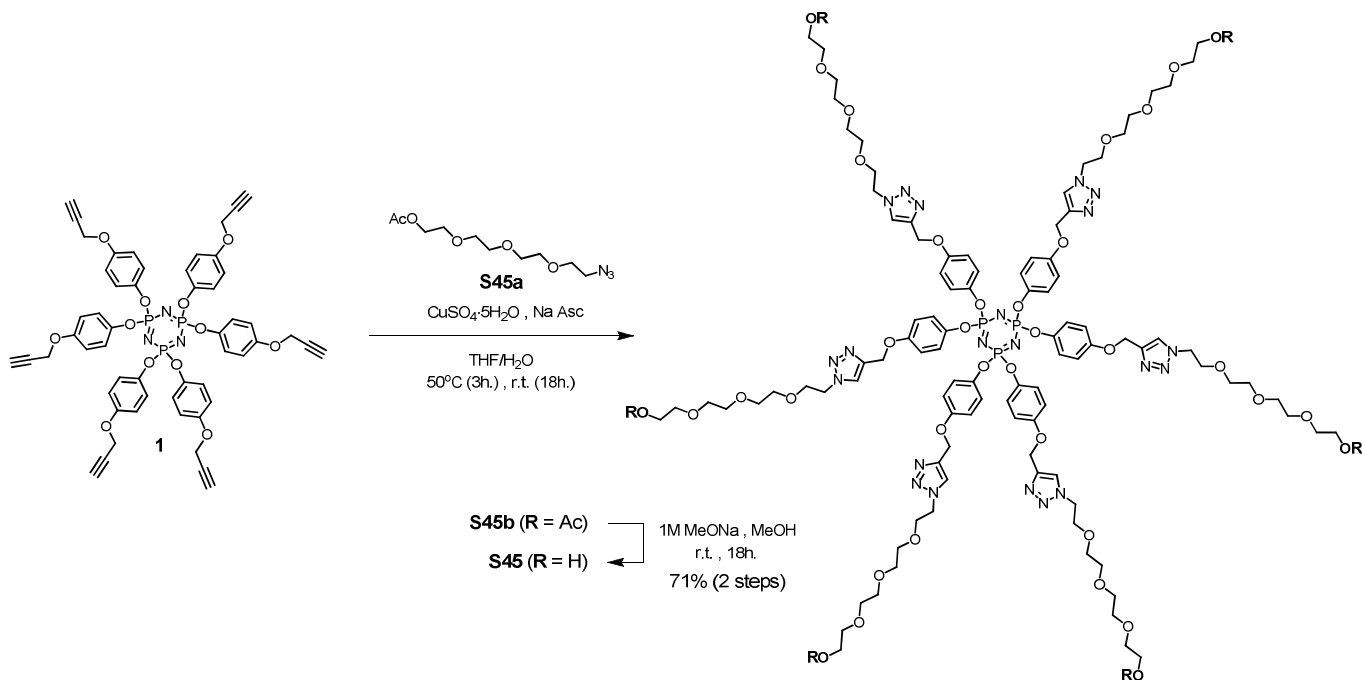

To a solution of propargylated derivative **1** (30.0 mg, 29.4  $\mu\text{mol}$ , 1.0 eq.) in a 1:1 mixture of  $\text{H}_2\text{O}/\text{THF}_{\text{anh}}$  (5 mL), were added acetylated tetra(ethylene)glycol azide **S45a** (92.4 mg, 354  $\mu\text{mol}$ , 12.0 eq., *previously obtained from acetylation of hydroxylated derivative in classical conditions ( $\text{Ac}_2\text{O}/\text{Pyridine}/\text{DMAP}_{\text{cat}}$  at  $25^\circ\text{C}$ , o.n.,  $R_f=0.6$  (3%MeOH in DCM))*),  $\text{CuSO}_4 \cdot 5\text{H}_2\text{O}$  (80.0 mg, 320  $\mu\text{mol}$ , 10.8 eq.) and sodium ascorbate (70.0 mg, 320  $\mu\text{mol}$ , 10.8 eq.). While stirring, the mixture was first heated at  $50^\circ\text{C}$  for 3 hours in a 2.0 mL vial and at room temperature for additional 18 hours. Ethyl acetate (15 mL) was added and the solution was poured into a separatory funnel containing ethyl acetate (10 mL), washed with saturated aqueous  $\text{NH}_4\text{Cl}$  ( $2 \times 10$  mL), water (10 mL) and brine (5 mL). Organics were collected, dried over  $\text{Na}_2\text{SO}_4$  and concentrated to dryness *in vacuo* with rotary evaporator. Purification by flash chromatography ( $\text{SiO}_2$ , DCM/MeOH 99:1 to 96:4) afforded desired acetylated multivalent compound **S45b** which was directly dissolved in dry MeOH (4 mL). A solution of sodium methoxide (1M in MeOH, 150  $\mu\text{L}$ ) was added. The reaction mixture was stirred at room temperature for 18 hours. The pH was adjusted to 7 with addition of ion-exchange resin (Amberlite IR 120  $\text{H}^+$ ). After filtration, the solvent was removed under *vacuum* with rotary evaporator and purification by flash chromatography ( $\text{SiO}_2$ , DCM/MeOH 85:15) to afford pure reference **S45** as viscous oil (48.8 mg, 20.9  $\mu\text{mol}$ , **71%** (2 steps)).

$R_f = 0.12$ , DCM/MeOH 85:15.

$^1\text{H NMR}$  (300 MHz,  $\text{CD}_3\text{OD}$ ,  $\delta$  ppm): 8.1 (s, 6H,  $H_{\text{triazole}}$ ), 6.87-6.77 (m, 24H,  $\text{CH}_{\text{ar}}$ ), 5.14 (br s, 12H,  $\text{OCH}_2\text{C}_{\text{triazole}}$ ), 4.55 (t,  $J = 5.0$  Hz, 12H,  $\text{CH}_2\text{N}_{\text{triazole}}$ ), 3.85 (t,  $J = 5.0$  Hz, 12H,  $\text{CH}_2\text{CH}_2\text{N}_{\text{triazole}}$ ), 3.63-3.48 (m, 72H,  $\text{OCH}_2$ ).

$^{13}\text{C NMR}$  (75 MHz,  $\text{CD}_3\text{OD}$ ,  $\delta$  ppm): 156.9 ( $\text{C}_a$ ), 145.8 ( $\text{C}_{\text{triazole}=\text{CH}}$ ), 144.7 ( $\text{C}_d$ ), 126.3 ( $\text{C}_{\text{triazole}=\text{CH}}$ ), 123.0 ( $\text{C}_c$ ), 116.8 ( $\text{C}_b$ ), 73.7 ( $\text{C}_{\text{triazole-CH}_2\text{O}}$ ), 71.5, 71.5, 71.4, 70.3, 62.9, 62.2 ( $\text{OCH}_2$ ), 51.4 ( $\text{NCH}_2$ ).

$^{31}\text{P NMR}$  (122 MHz,  $\text{CD}_3\text{OD}$ ,  $\delta$  ppm): 10.1 (m, 3P).

$m/z$  (ESI<sup>+</sup>-HRMS) for C<sub>102</sub>H<sub>144</sub>N<sub>210</sub>O<sub>36</sub>P<sub>3</sub>= 1166.9721 [M+2H]<sup>+</sup>; found 1166.9663; 1188.9540 [M+2Na]<sup>2+</sup>; found 1188.9547.

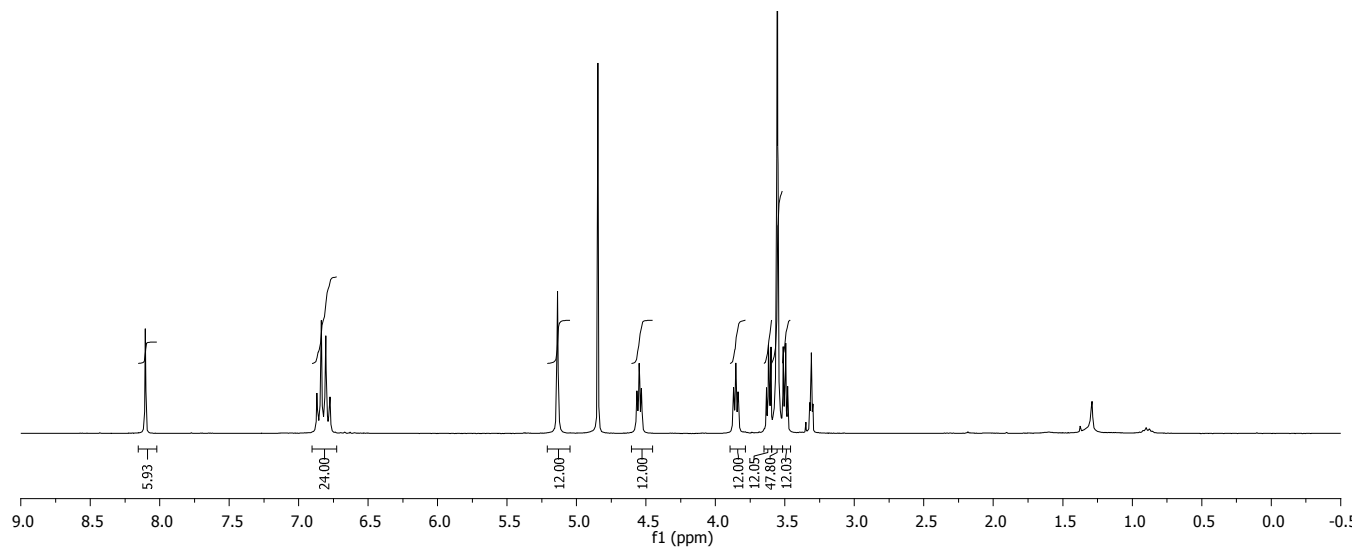

Figure S212. <sup>1</sup>H NMR spectrum of compound **45** (CD<sub>3</sub>OD, 300MHz)

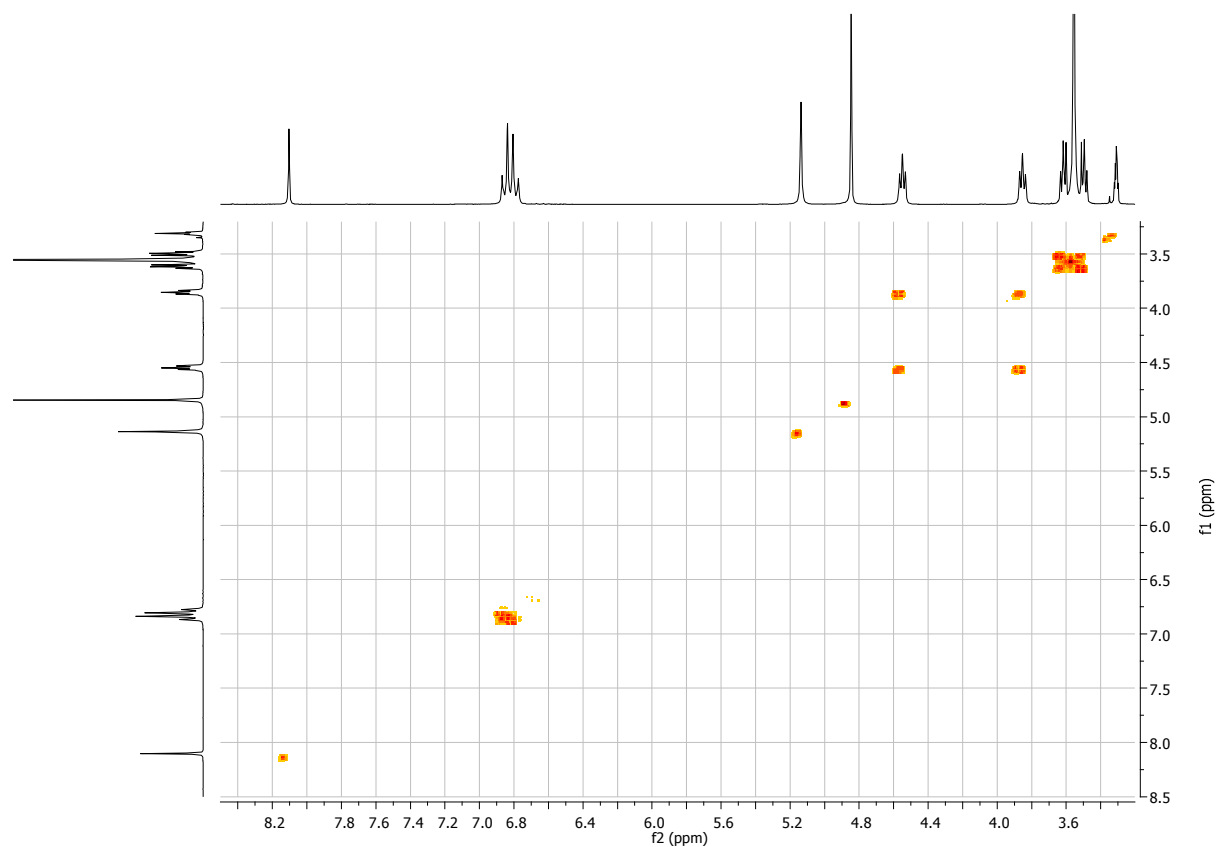

Figure S213. gCOSY spectrum of compound **45**



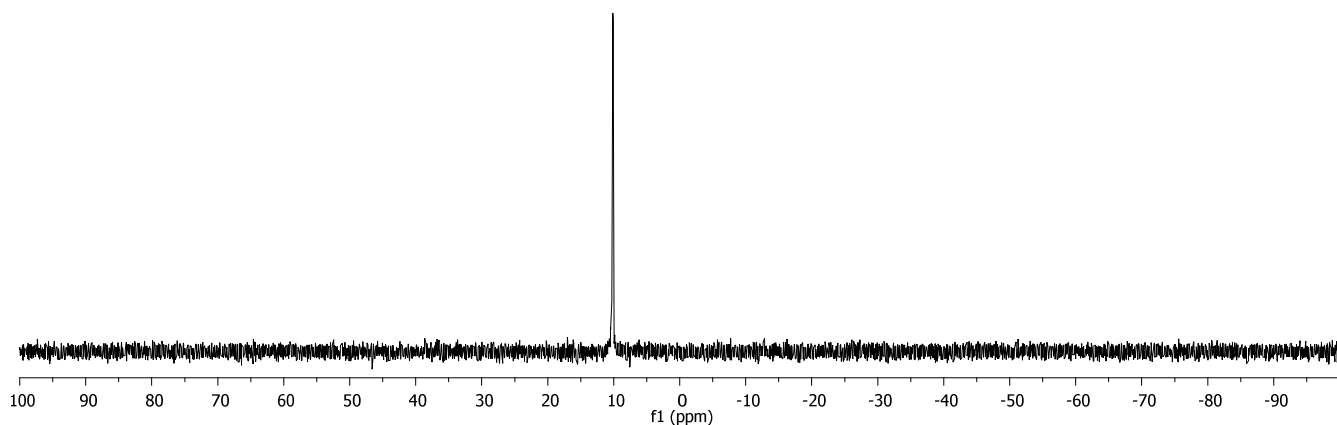

**Figure S214.**  $^{13}\text{P}$  NMR spectrum of compound **45** ( $\text{CD}_3\text{OD}$ , 122MHz)

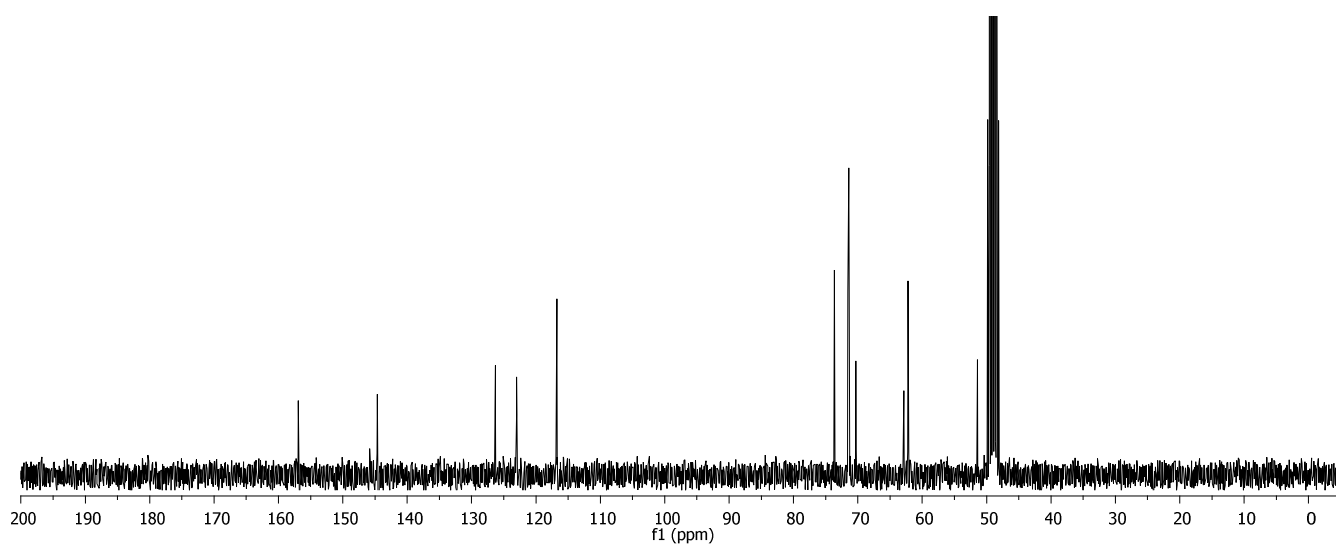

**Figure S215.**  $^{13}\text{C}$  NMR spectrum of compound **45** ( $\text{CD}_3\text{OD}$ , 75MHz)

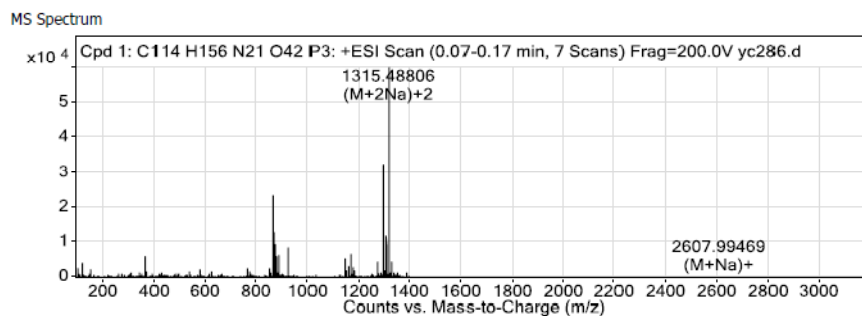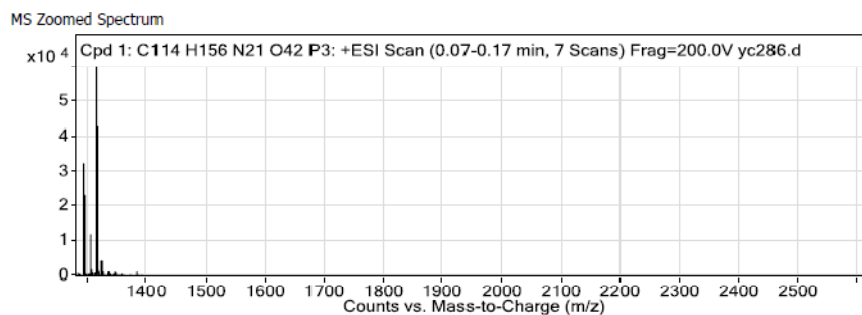

MS Spectrum Peak List

| Ion       | Formula                                                                          | Abund    | Observed m/z | Calc m/z   | Diff (ppm) |
|-----------|----------------------------------------------------------------------------------|----------|--------------|------------|------------|
| (M+2H)+2  | C <sub>114</sub> H <sub>156</sub> N <sub>21</sub> O <sub>42</sub> P <sub>3</sub> | 23800.17 | 1292.99974   | 1293.00376 | 3.11       |
| (M+2Na)+2 | C <sub>114</sub> H <sub>156</sub> N <sub>21</sub> O <sub>42</sub> P <sub>3</sub> | 44595.1  | 1314.98672   | 1314.9857  | -0.77      |

Figure S216. ESI<sup>+</sup>-HRMS spectrum of compound S45b

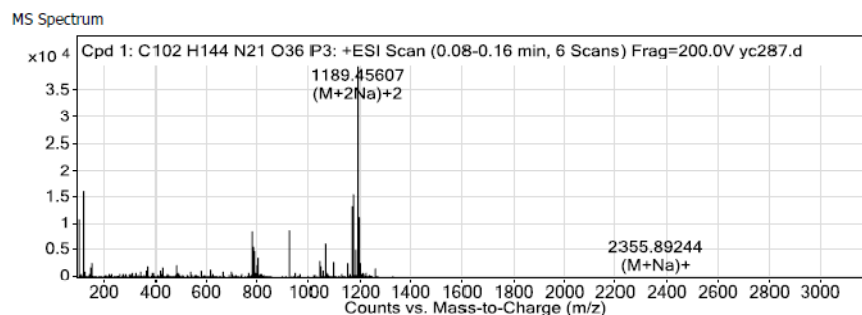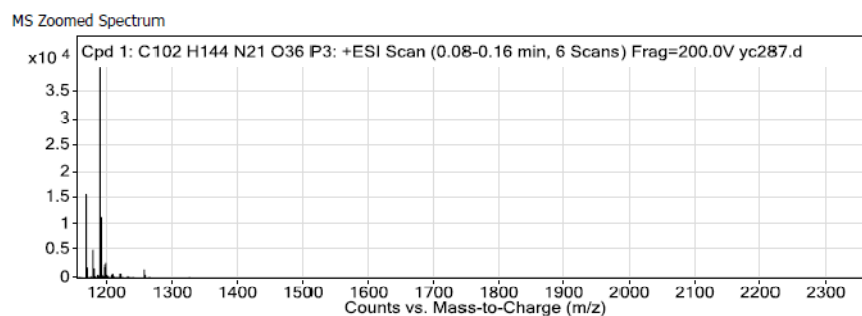

MS Spectrum Peak List

| Ion       | Formula                                                                          | Abund    | Observed m/z | Calc m/z   | Diff (ppm) |
|-----------|----------------------------------------------------------------------------------|----------|--------------|------------|------------|
| (M+2H)+2  | C <sub>102</sub> H <sub>144</sub> N <sub>21</sub> O <sub>36</sub> P <sub>3</sub> | 13457.15 | 1166.96627   | 1166.97206 | 4.96       |
| (M+2Na)+2 | C <sub>102</sub> H <sub>144</sub> N <sub>21</sub> O <sub>36</sub> P <sub>3</sub> | 31620.56 | 1188.9547    | 1188.95401 | -0.58      |

Figure S217. ESI<sup>+</sup>-HRMS spectrum of compound 45

## Synthesis of hexavalent analog of **1** lacking PEG chains

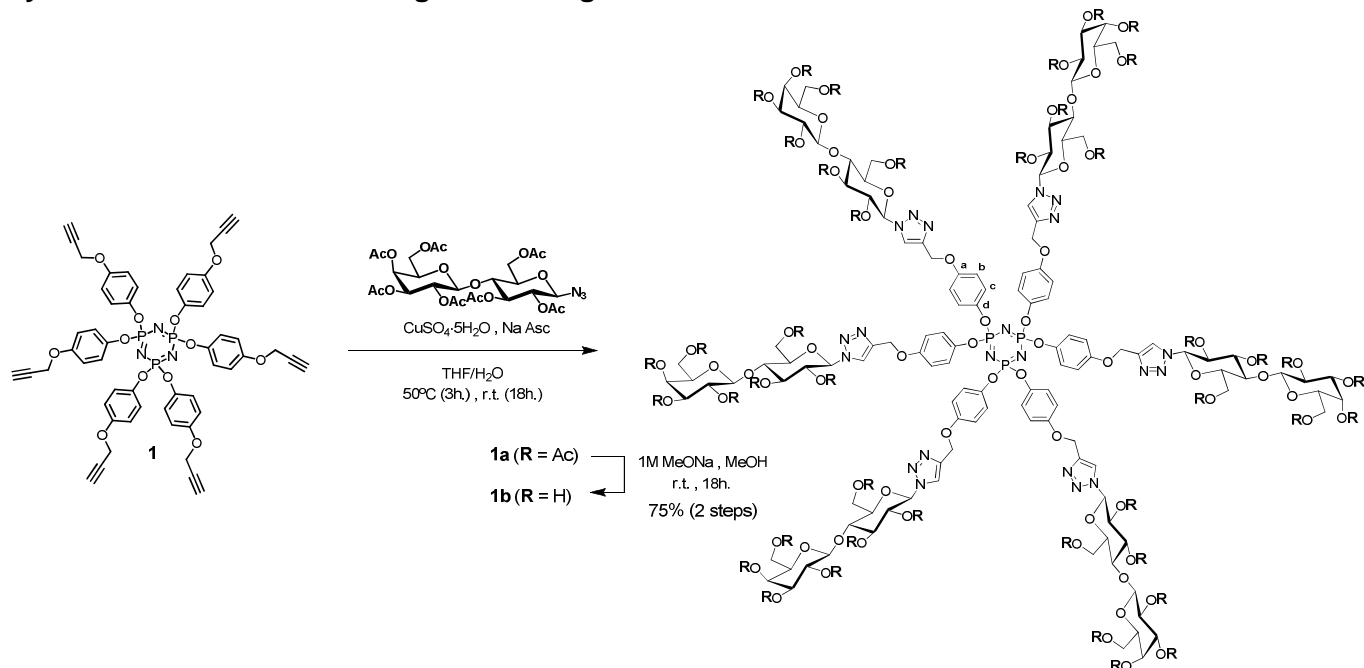

To a solution of propargylated derivative **1** (13.5 mg, 13.1  $\mu\text{mol}$ , 1.0 eq.) dissolved in a vial in a 1:1 mixture of  $\text{H}_2\text{O}/\text{THF}_{\text{anh}}$  (5 mL), were added lactosyl azide<sup>8</sup> (72.6 mg, 110.0  $\mu\text{mol}$ , 8.4 eq.),  $\text{CuSO}_4 \cdot 5\text{H}_2\text{O}$  (23.5 mg, 94.1  $\mu\text{mol}$ , 7.2 eq.) and sodium ascorbate (18.6 mg, 94.1  $\mu\text{mol}$ , 7.2 eq.). While stirring, the mixture was first heated at 50°C for 3 hours in a 20 mL vial and at room temperature for additional 18 hours. Ethyl acetate (15 mL) was added and the solution was poured into a separatory funnel containing ethyl acetate (10 mL), washed with saturated aqueous  $\text{NH}_4\text{Cl}$  (2x10 mL), water (10 mL) and brine (5 mL). Organics were collected, dried over  $\text{Na}_2\text{SO}_4$  and concentrated to dryness *in vacuo* with rotary evaporator. Purification by flash chromatography ( $\text{SiO}_2$ ,  $\text{DCM}/\text{MeOH}$  99:1 to 96:4) afforded desired acetylated multivalent compound **1a** (57.2 mg, 9.99  $\mu\text{mol}$ , 76%) which was directly dissolved in dry MeOH (4 mL). A solution of sodium methoxide (1M in MeOH, 150  $\mu\text{L}$ ) was added. The reaction mixture was stirred at room temperature for 18 hours. The solvent was then removed with a Pasteur pipette and dry MeOH (3 mL) is added to the residual solid. A vigorous agitation is maintained for an additional 15 min. period. After removal of the solvent with a Pasteur pipette, 3 mL of  $\text{H}_2\text{O}$  were added to the solid residue. The pH was adjusted to 7 with addition of ion-exchange resin (Amberlite IR 120  $\text{H}^+$ ). After filtration, the solvent was removed under *vacuum* with rotary evaporator to afford pure reference **1b** as viscous colorless oil (30.5 mg, 9.30  $\mu\text{mol}$ , 75% (2 steps)).

<sup>1</sup>H NMR (300 MHz,  $\text{D}_2\text{O}$ ,  $\delta$  ppm): 7.94 (s, 6H,  $H_{\text{triazole}}$ ), 6.49 (br s, 24H,  $\text{CH}_{\text{arom}}$ ), 5.49 (d,  $J = 9.2$  Hz, 6H,  $H_{1\text{glc}}$ ), 4.48 (br s, 6H,  $H_{1\text{gal}}$ ), 3.85-3.43 (m, 90H,  $H_{2\text{glc}}$ ,  $H_{3\text{glc}}$ ,  $H_{3\text{gal}}$ ,  $H_{4\text{glc}}$ ,  $H_{4\text{gal}}$ ,  $H_{5\text{glc}}$ ,  $H_{5\text{gal}}$ ,  $H_{6\text{glc}}$ ,  $H_{6\text{gal}}$ ,  $\text{OCH}_2\text{C}_{\text{q-triazole}}$ ,  $H_{2\text{gal}}$ ).

<sup>13</sup>C NMR (75 MHz,  $\text{D}_2\text{O}$ ,  $\delta$  ppm): 154.5 ( $\text{C}_a$ ), 143.5 ( $\text{C}_{\text{triazole}}$ ), 142.8 ( $\text{C}_d$ ), 123.9 ( $\text{CH}_{\text{triazole}}$ ), 121.3 ( $\text{C}_c$ ), 116.5 ( $\text{C}_b$ ), 102.6 ( $\text{C}_{1\text{gal}}$ ), 86.9 ( $\text{C}_{1\text{glc}}$ ), 77.2 ( $\text{C}_{4\text{glc}}$ ), 77.2 ( $\text{C}_{3\text{glc}}$ ), 74.9 ( $\text{C}_{5\text{glc}}$ ), 74.2 ( $\text{C}_{2\text{glc}}$ ), 72.1 ( $\text{C}_{3\text{gal}}$ ), 71.6 ( $\text{C}_{5\text{gal}}$ ), 70.5 ( $\text{C}_{2\text{gal}}$ ), 68.1 ( $\text{C}_{4\text{gal}}$ ), 60.7 ( $\text{C}_{6\text{gal}}$ ), 60.6 ( $\text{OCH}_2$ ), 59.3 ( $\text{C}_{6\text{glc}}$ ).

<sup>8</sup> F. D. Tropper, F. O. Andersson, S. Braun and R. Roy, *Synthesis* 1992, 618–620.

$^{31}\text{P}$  NMR (122 MHz,  $\text{CDCl}_3$ ,  $\delta$  ppm): 10.3 (s, 3P).

$m/z$  (ESI $^+$ -HRMS) for  $\text{C}_{126}\text{H}_{168}\text{N}_{21}\text{O}_{72}\text{P}_3 = 1632.9564 [M+2\text{Na}]^{2+}$ ; found 1632.9574.

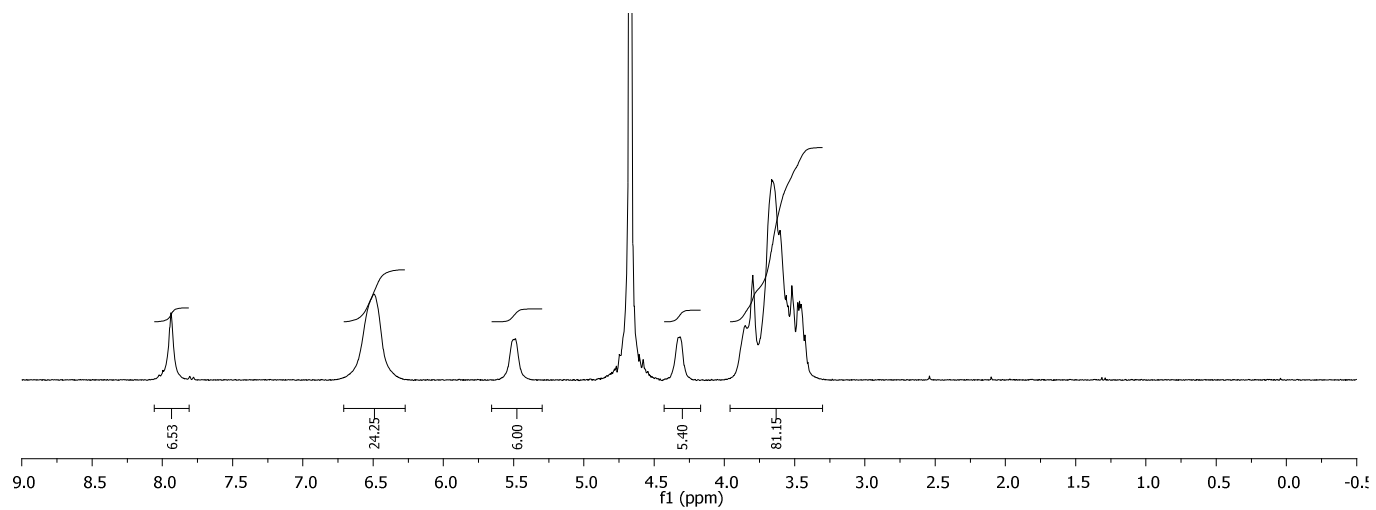

**Figure S218.**  $^1\text{H}$  NMR spectrum of compound **1b** ( $\text{D}_2\text{O}$ , 300MHz)

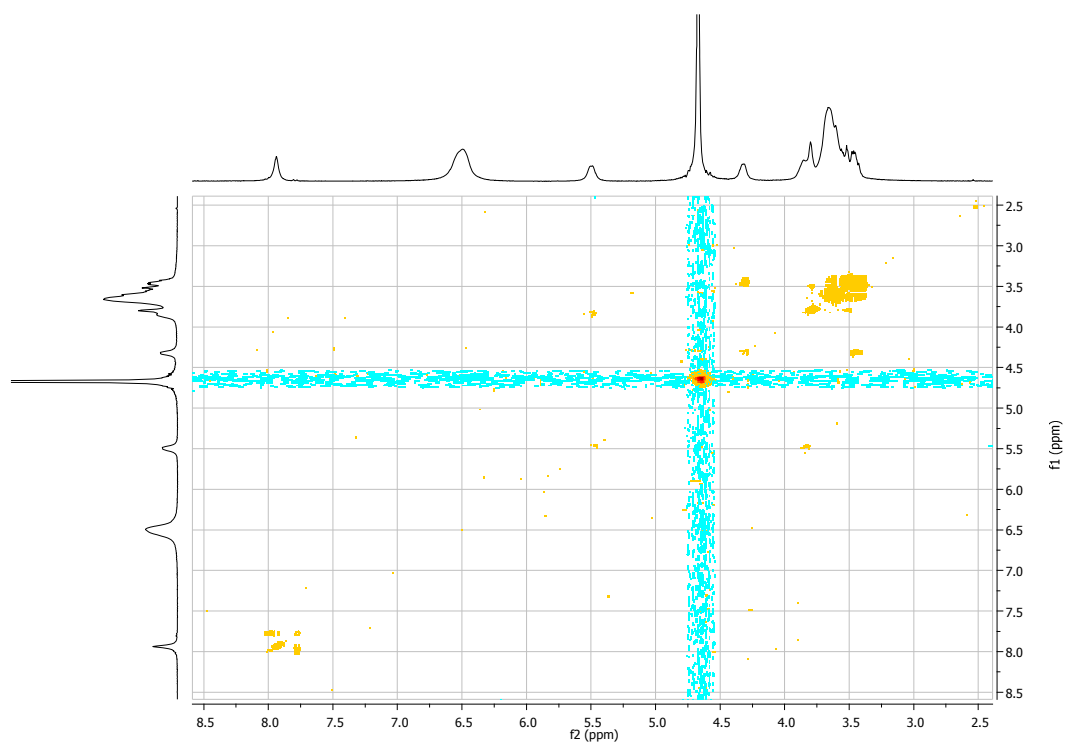

**Figure S219.** gCOSY spectrum of compound **1b**

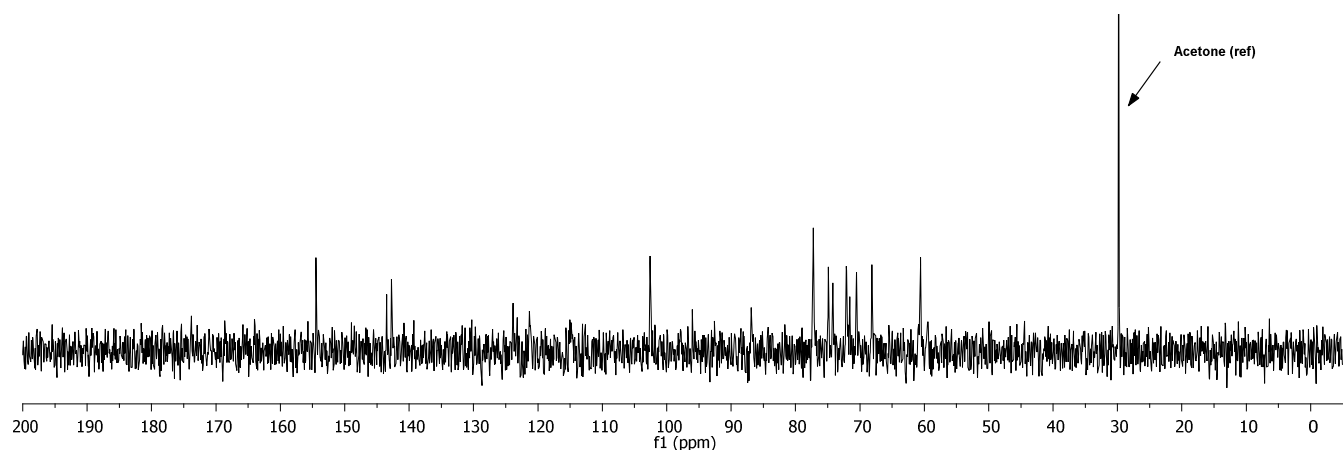

Figure S220.  $^{13}\text{C}$  NMR spectrum of compound **1b** ( $\text{D}_2\text{O}$ , 75MHz)

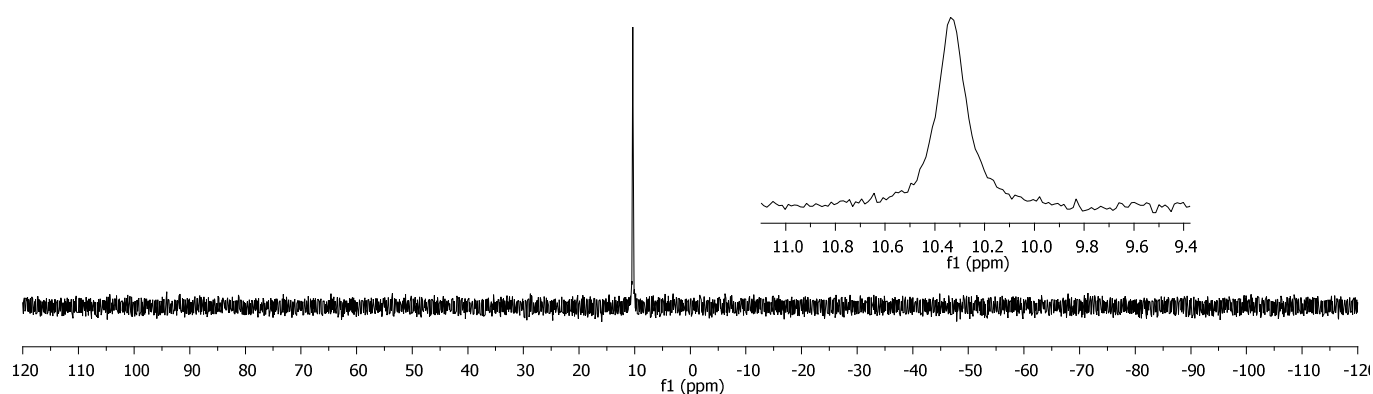

Figure S221.  $^{13}\text{P}$  NMR spectrum of compound **1b** ( $\text{D}_2\text{O}$ , 122 MHz)

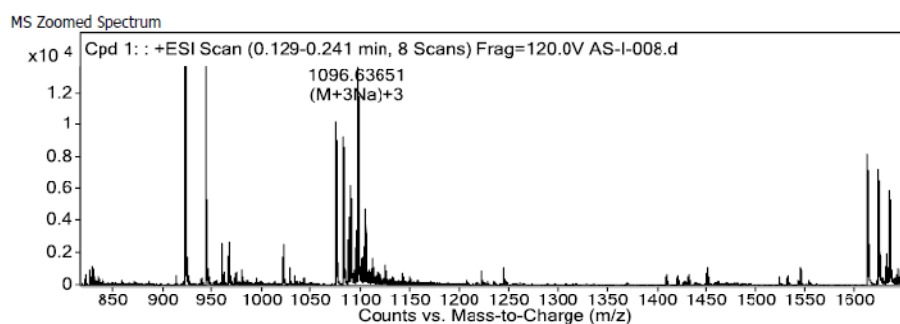

MS Spectrum Peak List

| Ion       | Ion Formula                                                                                      | Abund  | Expe. m/z  | Calc. m/z  | Diff(ppm) |
|-----------|--------------------------------------------------------------------------------------------------|--------|------------|------------|-----------|
| (M+4Na)+4 | C <sub>126</sub> H <sub>168</sub> N <sub>21</sub> Na <sub>4</sub> O <sub>72</sub> P <sub>3</sub> | 948.2  | 827.97384  | 827.9728   | 1.27      |
| (M+3H)+3  | C <sub>126</sub> H <sub>171</sub> N <sub>21</sub> O <sub>72</sub> P <sub>3</sub>                 | 7035.6 | 1074.32156 | 1074.31871 | 2.66      |
| (M+3Na)+3 | C <sub>126</sub> H <sub>168</sub> N <sub>21</sub> Na <sub>3</sub> O <sub>72</sub> P <sub>3</sub> | 9349.4 | 1096.30229 | 1096.30065 | 1.49      |
| (M+2H)+2  | C <sub>126</sub> H <sub>170</sub> N <sub>21</sub> O <sub>72</sub> P <sub>3</sub>                 | 5351.3 | 1610.97588 | 1610.97442 | 0.91      |
| (M+2Na)+2 | C <sub>126</sub> H <sub>168</sub> N <sub>21</sub> Na <sub>2</sub> O <sub>72</sub> P <sub>3</sub> | 4041   | 1632.95736 | 1632.95637 | 0.61      |

Figure S222. ESI<sup>+</sup>-HRMS spectrum of compound **1b**

## Synthetic sequence for the construction of “onion peel” glycodendrimer with 45 peripheral protected lactosides

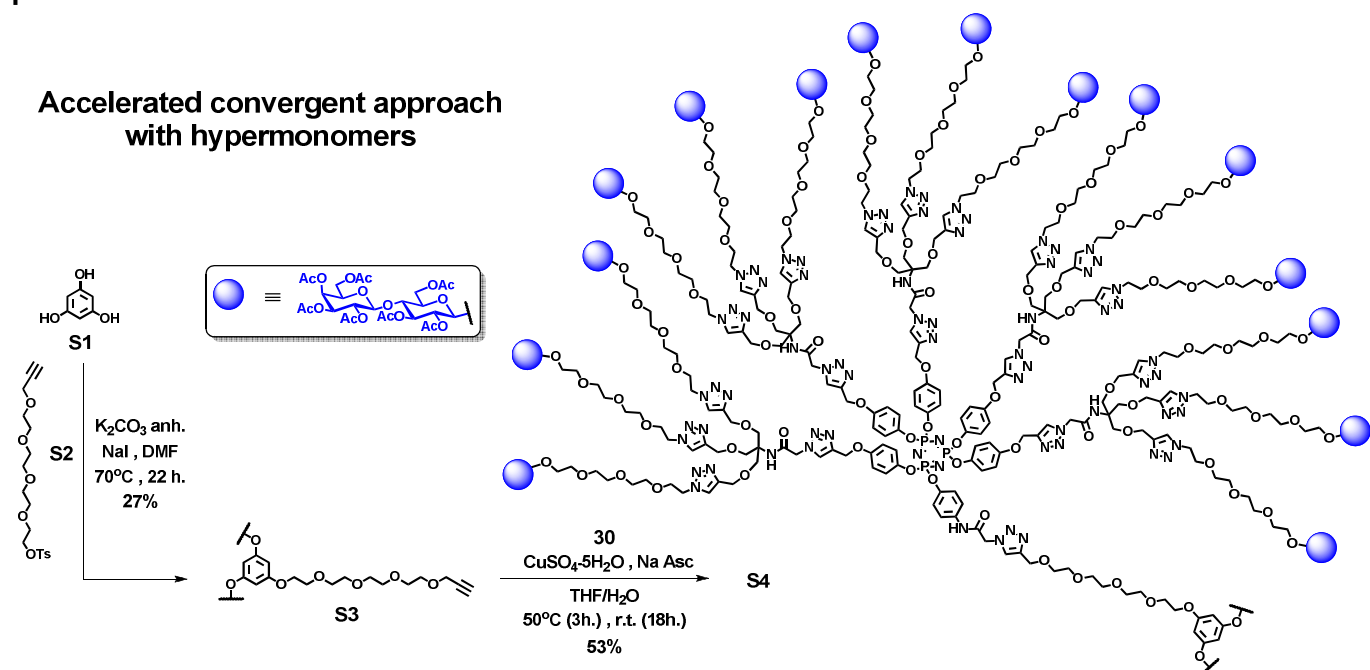

A highly accelerated convergent approach based on the three-fold coupling of  $\text{AB}_{15}$  hypermonomer around an extended core was investigated (Scheme 10). To this end, three tetra(ethylene)glycol chains containing one terminal propargylic function (**S2**)<sup>9</sup> were introduced onto commercial phloroglucinol **S1**. NMR spectra of **S3** clearly indicated desired *O*-alkylations with characteristic signal of  $\text{CH}_{\text{ar}}$  in  $^1\text{H}$  NMR at  $\delta 6.03$  ppm integrating for three protons, together with two distinctive signals in  $^{13}\text{C}$  NMR at  $\delta 160.6$  and  $94.4$  ppm for  $\text{C}_{\text{ar}}\text{O}$  and  $\text{CH}_{\text{ar}}$ , respectively. Relative integrations corresponding to terminal propargylic signals are in addition in full agreement with those from the aromatic section, thus confirming the three-fold substitution. Application of Cu-catalyzed click reaction in the presence of dendron **30** and core **S3** furnished the desired “onion peel” glycodendrimer **S4** containing 45 peripheral lactoside units, in a satisfactory yield of 53%. Once again, NMR analyses clearly indicated the absence of characteristic signals from precursor **30**, notably the triplet at  $\delta 2.43$  ppm in  $^1\text{H}$  NMR for  $-\text{CH}_2\text{C}\equiv\text{CH}$  and the distinctive signal at  $\delta 58.4$  ppm in  $^{13}\text{C}$  NMR for  $-\text{CH}_2\text{C}\equiv\text{CH}$ . On the other hand, expected central aromatic's signals mentioned earlier clearly pointed out, confirming the integrity of the macromolecule **S4** (See SI). Unfortunately, in deep contrast with other structures presented herein (See the following section), analytical efforts towards the complete characterization of compound **S4** were unsuccessful, especially for MALDI-TOF MS and GPC techniques. Protocols' optimization concerning Mass Spectrometry analyses (matrix) for **S4** is currently under investigation.

<sup>9</sup> X.-L. Sun, C. L. Stabler, C. S. Cazalis and E. L. Chaikof, *Bioconjugate Chem.*, 2006, **17**, 52–57.

### PEGylated core **S3**

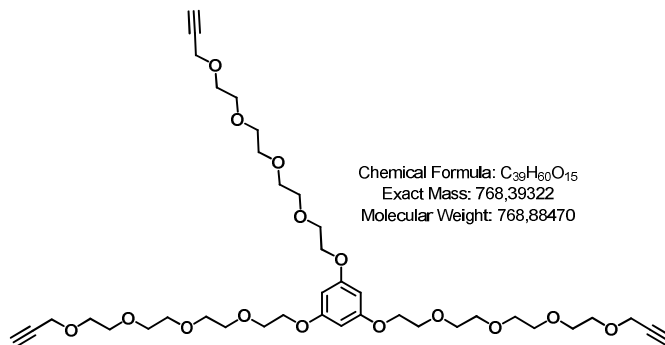

To a solution of phloroglucinol **S1** (12.4 mg, 98.3  $\mu$ mol, 1.0 eq.) in DMF<sub>anh.</sub> (2 mL), were added K<sub>2</sub>CO<sub>3</sub> (dried at 200°C under vacuum) (81.5 mg, 590  $\mu$ mol, 6.0 eq.) and NaI (1.47 mg, 9.83  $\mu$ mol, 0.1 eq.) under a N<sub>2</sub> atmosphere. A solution of di-functional PEG **S2**<sup>9</sup> in 0.5 mL of DMF<sub>anh.</sub> was then slowly added and the resulting mixture was heated at 70°C for 22 hours. Ethyl acetate (25 mL) was added and the solution was poured into a separatory funnel containing ethyl acetate (10 mL), washed with saturated aqueous NH<sub>4</sub>Cl (3×30 mL), water (20 mL) and brine (15 mL). Organics were collected, dried over Na<sub>2</sub>SO<sub>4</sub> and concentrated to dryness *in vacuo* with rotary evaporator. Purification by flash chromatography (SiO<sub>2</sub>, DCM/MeOH 100:0 to 99:1) afforded desired core **S3** (20.4 mg, 26.5  $\mu$ mol, **27%**) as a yellowish foam.

R<sub>f</sub> = 0.20, DCM/MeOH 97:3

<sup>1</sup>H NMR (300 MHz, CDCl<sub>3</sub>,  $\delta$  ppm): 6.11 (s, 3H, CH<sub>ar</sub>), 4.20 (d, *J* = 1.9 Hz, 6H, CH<sub>2</sub>C≡CH), 4.07 (t, *J* = 4.9 Hz, 6H, C<sub>ar</sub>OCH<sub>2</sub>CH<sub>2</sub>), 3.83 (t, *J* = 4.9 Hz, 6H, C<sub>ar</sub>OCH<sub>2</sub>CH<sub>2</sub>), 3.70-3.67 (m, 36H, OCH<sub>2</sub>CH<sub>2</sub>O), 2.44 (d, *J* = 1.9 Hz, 3H, CH<sub>2</sub>C≡CH).

<sup>13</sup>C NMR (75 MHz, CDCl<sub>3</sub>,  $\delta$  ppm): 160.5 (C<sub>ar</sub>O), 94.4 (CH<sub>ar</sub>), 79.7 (C≡CH), 74.5 (C≡CH), 70.8, 70.6, 70.4, 69.6, 69.1, 67.4 (OCH<sub>2</sub>CH<sub>2</sub>O), 58.4 (CH<sub>2</sub>C≡CH).

*m/z* (ESI<sup>+</sup>-HRMS) for C<sub>39</sub>H<sub>60</sub>O<sub>15</sub> = 769.4005 [*M*+H]<sup>+</sup>; found 769.3993 ; 791.3824 [*M*+Na]<sup>+</sup>; found 791.3813.

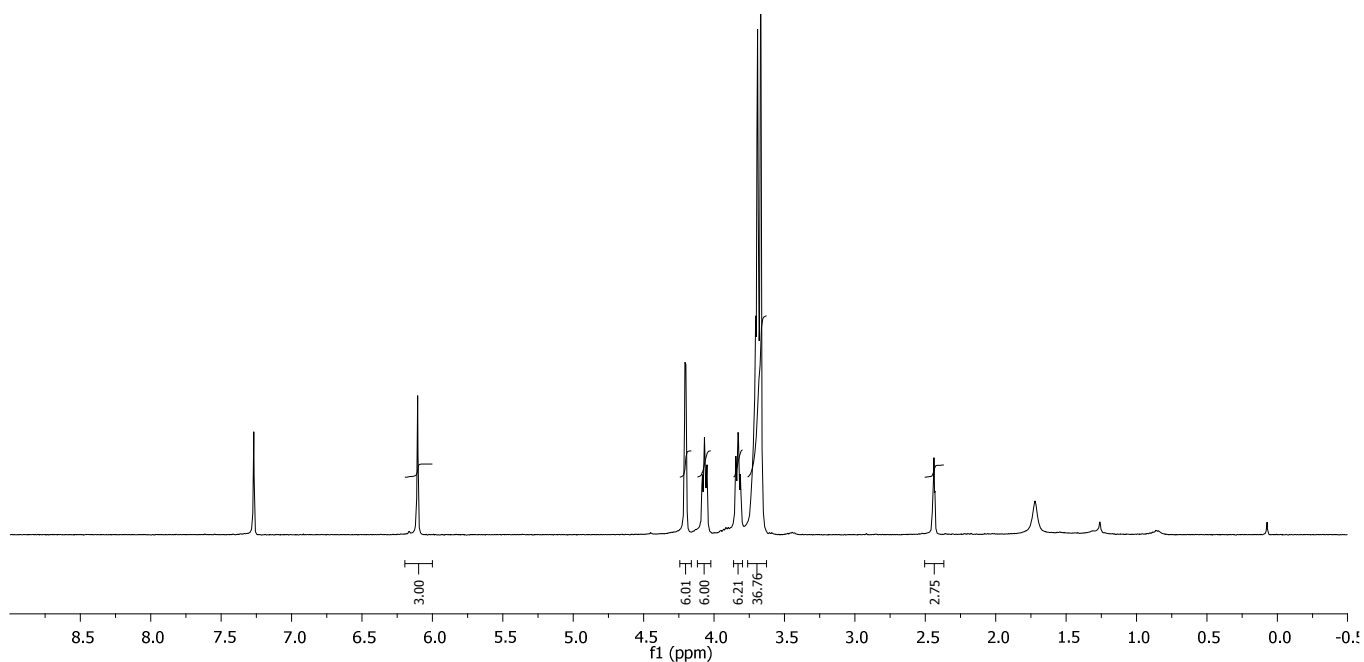

Figure S223.  $^1\text{H}$  NMR spectrum of compound **S3** ( $\text{CDCl}_3$ , 300MHz)

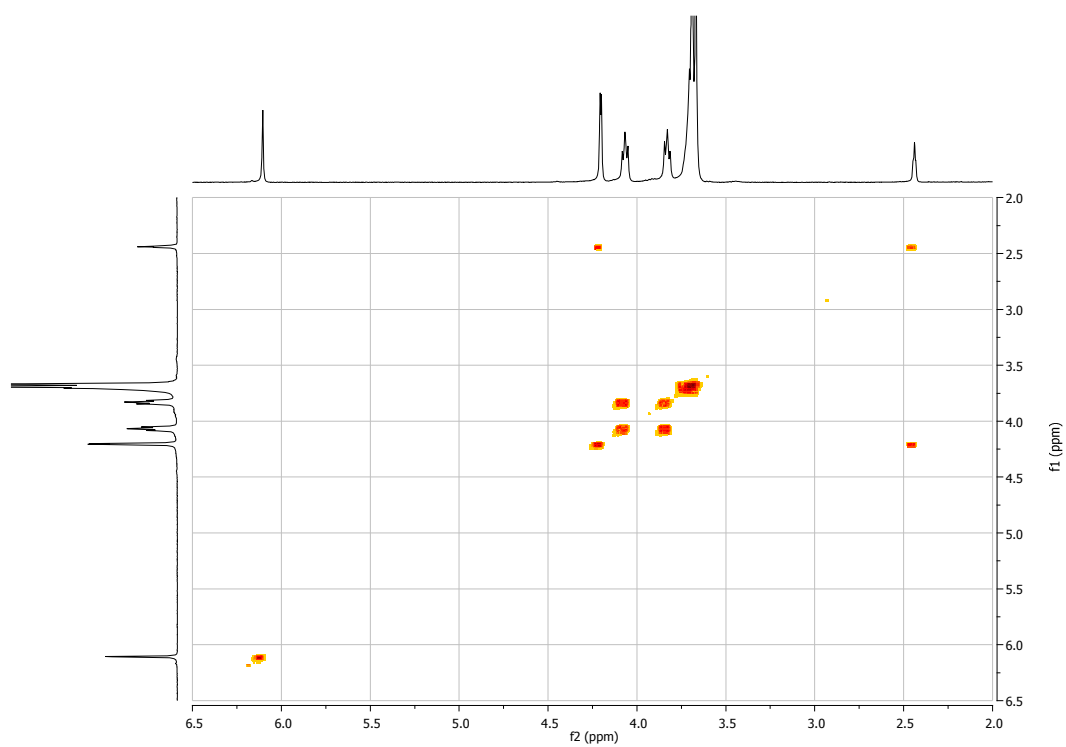

Figure S224. gCOSY spectrum of compound **S3**



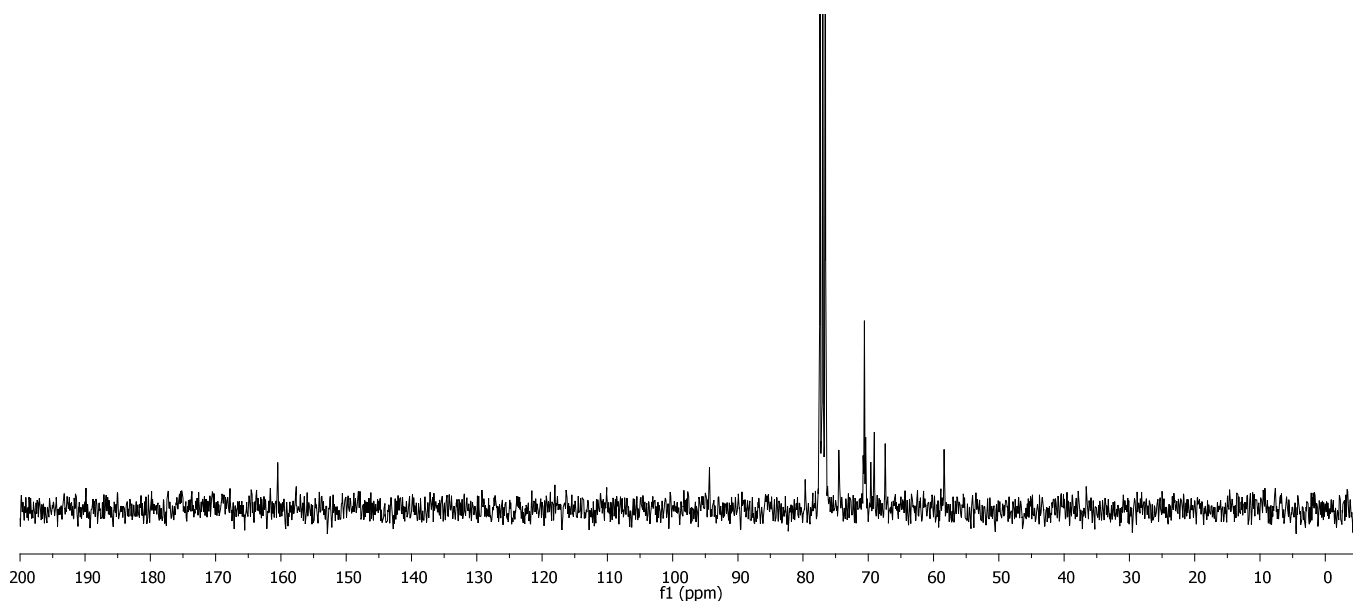

Figure S225.  $^{13}\text{C}$  NMR spectrum of compound **S3** ( $\text{CDCl}_3$ , 75MHz)

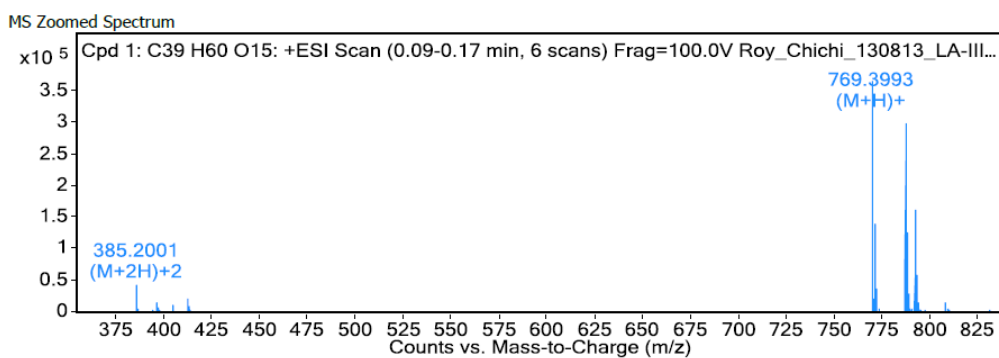

MS Spectrum Peak List

| $m/z$    | Calc $m/z$ | Diff(ppm) | $z$ | Abund  | Formula                                              | Ion                       |
|----------|------------|-----------|-----|--------|------------------------------------------------------|---------------------------|
| 385.2001 | 385.2039   | -9.87     | 2   | 44770  | $\text{C}_{39}\text{H}_{62}\text{O}_{15}$            | $(\text{M}+2\text{H})+2$  |
| 385.7017 | 385.7056   | -10.16    | 2   | 18131  | $\text{C}_{39}\text{H}_{62}\text{O}_{15}$            | $(\text{M}+2\text{H})+2$  |
| 386.2033 | 386.207    | -9.63     | 2   | 5313   | $\text{C}_{39}\text{H}_{62}\text{O}_{15}$            | $(\text{M}+2\text{H})+2$  |
| 407.1821 | 407.1858   | -9.23     | 2   | 1774   | $\text{C}_{39}\text{H}_{60}\text{Na}_2\text{O}_{15}$ | $(\text{M}+2\text{Na})+2$ |
| 769.3993 | 769.4005   | -1.54     |     | 371051 | $\text{C}_{39}\text{H}_{61}\text{O}_{15}$            | $(\text{M}+\text{H})+$    |
| 769.7456 |            |           |     | 22232  |                                                      |                           |
| 770.4031 | 770.4039   | -1.1      |     | 150095 | $\text{C}_{39}\text{H}_{61}\text{O}_{15}$            | $(\text{M}+\text{H})+$    |
| 770.7447 |            |           |     | 7656   |                                                      |                           |
| 771.4059 | 771.4067   | -0.97     |     | 37361  | $\text{C}_{39}\text{H}_{61}\text{O}_{15}$            | $(\text{M}+\text{H})+$    |
| 772.4081 | 772.4094   | -1.68     |     | 6755   | $\text{C}_{39}\text{H}_{61}\text{O}_{15}$            | $(\text{M}+\text{H})+$    |
| 786.4255 | 786.427    | -1.94     | 1   | 305440 | $\text{C}_{39}\text{H}_{64}\text{N}\text{O}_{15}$    | $(\text{M}+\text{NH}_4)+$ |
| 787.4296 | 787.4304   | -1.02     | 1   | 127114 | $\text{C}_{39}\text{H}_{64}\text{N}\text{O}_{15}$    | $(\text{M}+\text{NH}_4)+$ |
| 788.4314 | 788.4332   | -2.28     | 1   | 29899  | $\text{C}_{39}\text{H}_{64}\text{N}\text{O}_{15}$    | $(\text{M}+\text{NH}_4)+$ |
| 789.4336 | 789.4359   | -2.85     | 1   | 5880   | $\text{C}_{39}\text{H}_{64}\text{N}\text{O}_{15}$    | $(\text{M}+\text{NH}_4)+$ |
| 791.3813 | 791.3824   | -1.43     | 1   | 168368 | $\text{C}_{39}\text{H}_{60}\text{Na}\text{O}_{15}$   | $(\text{M}+\text{Na})+$   |

Figure S226. ESI+HRMS spectrum of compound **S3**

## Protected glycodendrimer with 45 peripheral lactosides **S4**

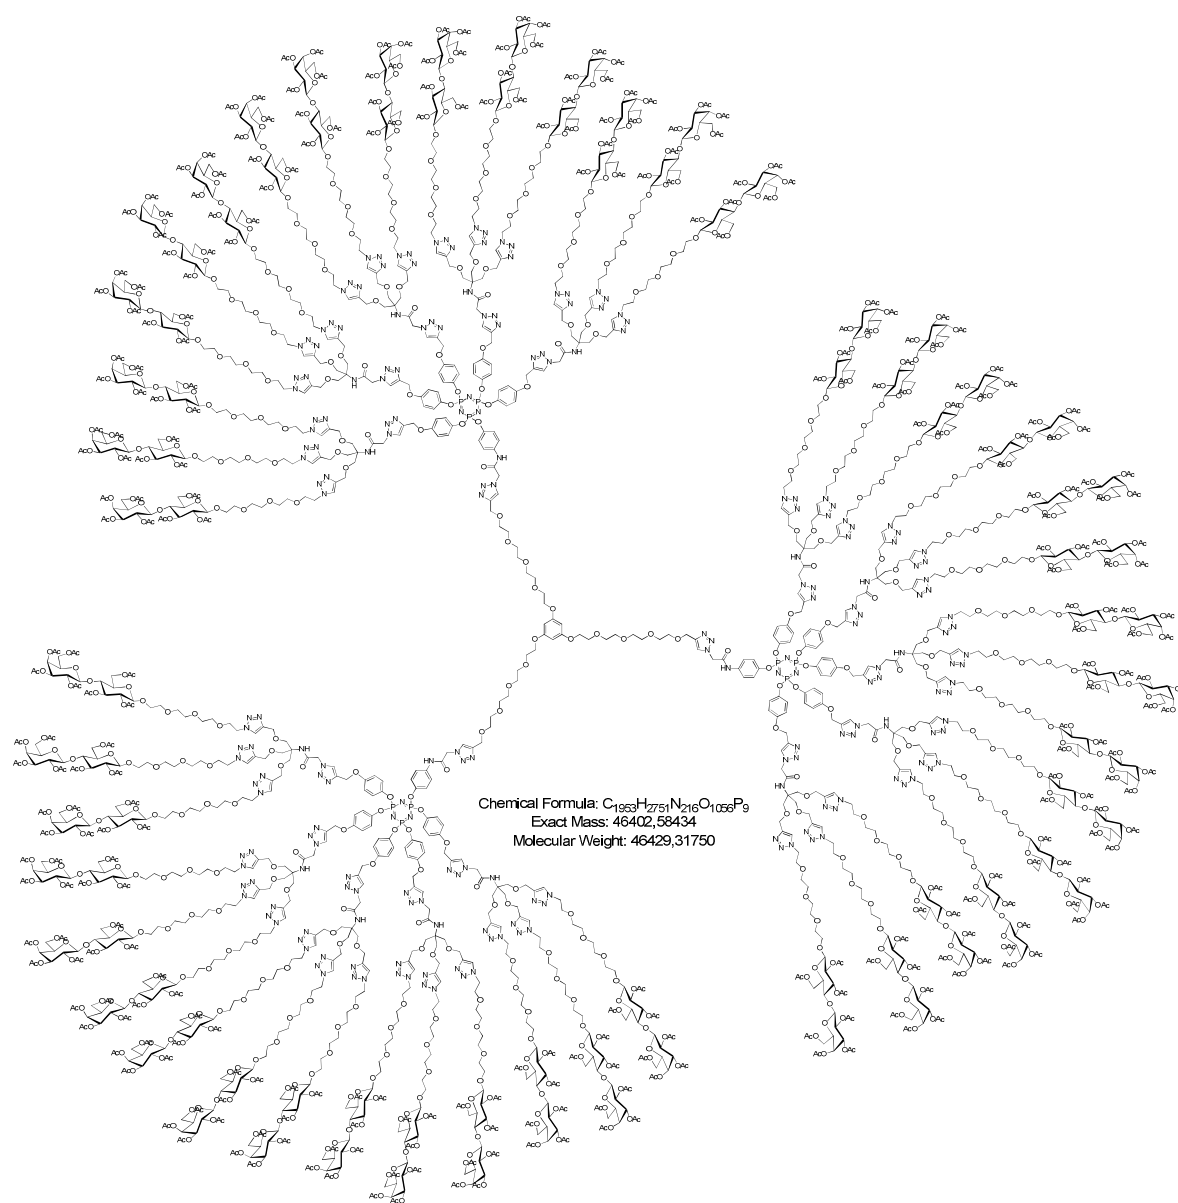

To a stirring solution of core **S3** (0.96 mg, 1.25  $\mu\text{mol}$ , 1.0 eq.) and hypermonomer **30** (80.2 mg, 5.27  $\mu\text{mol}$ , 4.2 eq.) in dry THF (2.5 mL) were added 2.5 mL of  $\text{H}_2\text{O}$  and a mixture of  $\text{CuSO}_4 \cdot 5\text{H}_2\text{O}$  (2.84 mg, 11.3  $\mu\text{mol}$ , 9.0 eq.) and sodium ascorbate (2.23 mg, 1.13  $\mu\text{mol}$ , 9.0 eq.). After stirring for 3 hours at  $50^\circ\text{C}$  in a 20 mL vial, the reaction was left stirring at room temperature for 18 hours (additional  $\text{CuSO}_4 \cdot 5\text{H}_2\text{O}$  (1.00 mg) and sodium ascorbate (0.80 mg) were incorporated in the mixture after 5 hours of reaction). EtOAc (25 mL) was added and the solution was washed successively with a saturated aqueous solution of  $\text{NH}_4\text{Cl}$  (3 $\times$ 15 mL), water (2 $\times$ 10 mL) and brine (10 mL). The organic phase was then dried over  $\text{MgSO}_4$  and concentrated under reduced pressure. Column chromatography on silica (DCM/MeOH 100:0 to 93:7) afforded the desired compound **S4** (30.7 mg, 0.66  $\mu\text{mol}$ , **53%**) as a colorless oil.

R<sub>f</sub> = 0.15, DCM/MeOH 94:6

<sup>1</sup>H NMR (600 MHz, CDCl<sub>3</sub>, δ ppm): ~8.00 (3H, NH) (*not visible*), 7.92-7.90 (m, 18H, H<sub>triazole int</sub>), 7.74-7.69 (s, 45H, H<sub>triazole ext</sub>), 7.40-7.28 (br s, 21H, NH + CH<sub>b</sub>'), 7.03-6.50 (m, 66H, CH<sub>b</sub>, CH<sub>c</sub>, CH<sub>c'</sub>), 6.07 (s, 3H, CH<sub>ar</sub>), 5.34 (d<sub>app</sub>, 45H, H<sub>4gal</sub> + br s (6H, N<sub>triazole</sub>CH<sub>2</sub>CONH)), 5.17 (t<sub>app</sub>, 45H, H<sub>3glc</sub>), 5.10-5.07 (m, 75H, C<sub>q</sub>CH<sub>2</sub>O, H<sub>2gal</sub>), 4.93 (dd, <sup>3</sup>J<sub>2,3</sub> = 3.4 Hz, <sup>3</sup>J<sub>3,4</sub> = 7.0 Hz, 45H, H<sub>3gal</sub>), 4.84 (t<sub>app</sub>, 45H, H<sub>2glc</sub>), 4.55-4.46 (m, 315H, C<sub>q</sub>CH<sub>2</sub>O, OCH<sub>2</sub>CH<sub>2</sub>N, H<sub>1glc</sub>, H<sub>6aglc</sub>, H<sub>1gal</sub>), 4.13-4.05 (m, 135H, H<sub>6bglc</sub>, H<sub>6agal</sub>, H<sub>6bgal</sub>), 3.89-3.55 (m, 933H, NHCOCH<sub>2</sub>N<sub>triazole</sub>, OCH<sub>2</sub>CH<sub>2</sub>N, H<sub>5gal</sub>, H<sub>5glc</sub>, H<sub>4glc</sub>, OCH<sub>2</sub>, HNC<sub>q</sub>CH<sub>2</sub>O), 2.11-1.92 (m, 945H, COCH<sub>3</sub>).

<sup>13</sup>C NMR (150 MHz, CDCl<sub>3</sub>, δ ppm): 170.3, 170.3, 170.1, 170.0, 169.7, 169.6, 169.0 (7xs, COCH<sub>3</sub>), 166.1 (CONH), 165.1 (CONH), **160.4 (C<sub>ar</sub>O)**, 155.4 (C<sub>a</sub>), 147.3 (C<sub>d'</sub>), 144.3 (C<sub>d</sub>), 144.3, 144.2 (C<sub>triazole=CH</sub>), 143.5 (C<sub>triazole=CH</sub>), 134.7 (C<sub>a'</sub>), 125.2 (C<sub>triazole=CH</sub>), 125.2 (C<sub>triazole=CH</sub>), 123.8 (C<sub>triazole=CH</sub>), 121.8 (C<sub>c</sub>), 121.1 (C<sub>b'</sub>), 120.9 (C<sub>c'</sub>), 115.9, 115.3 (C<sub>b</sub>), 100.9 (C<sub>1gal</sub>), 100.5 (C<sub>1glc</sub>), **94.2 (CH<sub>ar</sub>)**, 76.2 (C<sub>4glc</sub>), 72.6 (C<sub>3glc</sub>), 72.5 (C<sub>5glc</sub>), 71.5 (C<sub>2glc</sub>), 70.9 (C<sub>3gal</sub>), 70.5 (C<sub>5gal</sub>), 70.5, 70.4, 70.3, 70.1, 69.2 (OCH<sub>2</sub>), 68.9 (C<sub>2gal</sub>), 68.9 (OCH<sub>2</sub>), 68.5 (C<sub>q</sub>CH<sub>2</sub>O), 67.3 (CH<sub>2</sub>O), 66.5 (C<sub>4gal</sub>), 64.5 (OCH<sub>2</sub>C=C), 62.0 (C<sub>q</sub>), 61.9 (C<sub>6glc</sub> + C<sub>q</sub>CH<sub>2</sub>O), 60.7 (C<sub>6gal</sub>), 60.3 (OCH<sub>2</sub>), 52.5 (N<sub>triazole</sub>CH<sub>2</sub>CONH), 50.1 (NCH<sub>2</sub>), 20.7, 20.7, 20.6, 20.5, 20.5, 20.4 (7xs, COCH<sub>3</sub>).

<sup>31</sup>P NMR (122 MHz, CDCl<sub>3</sub>, δ ppm): 10.2- 9.8 (m, 9P).

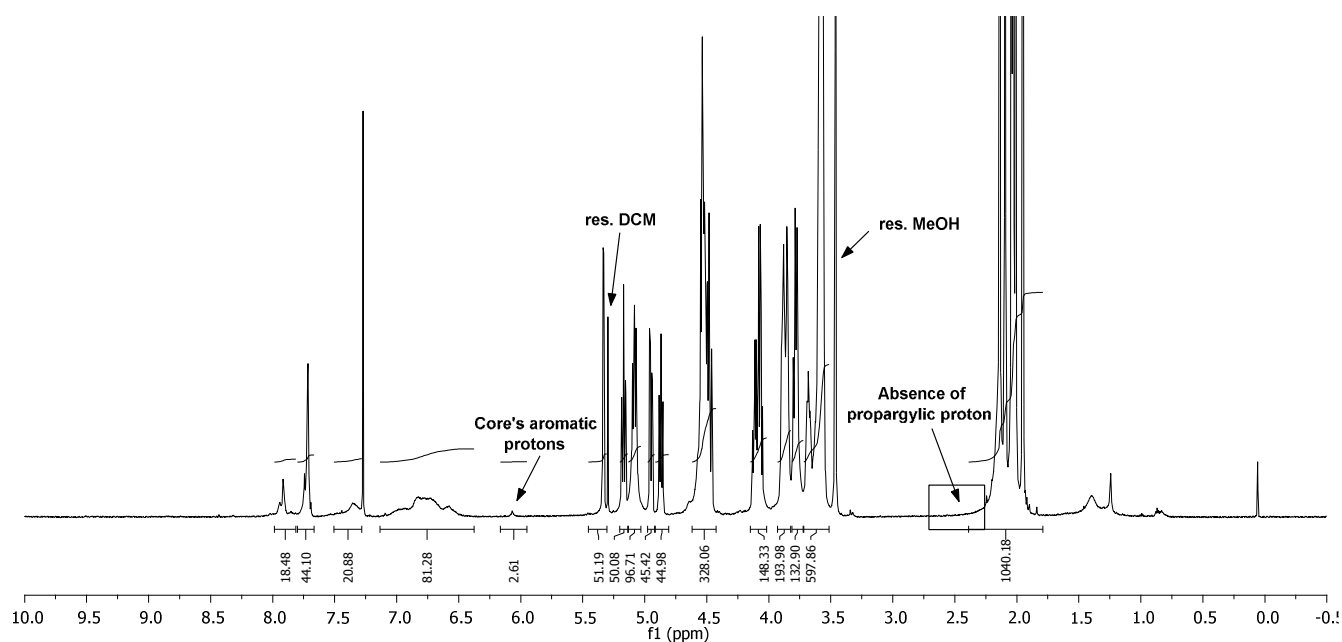

Figure S227. <sup>1</sup>H NMR spectrum of compound **S4** (CDCl<sub>3</sub>, 600MHz)

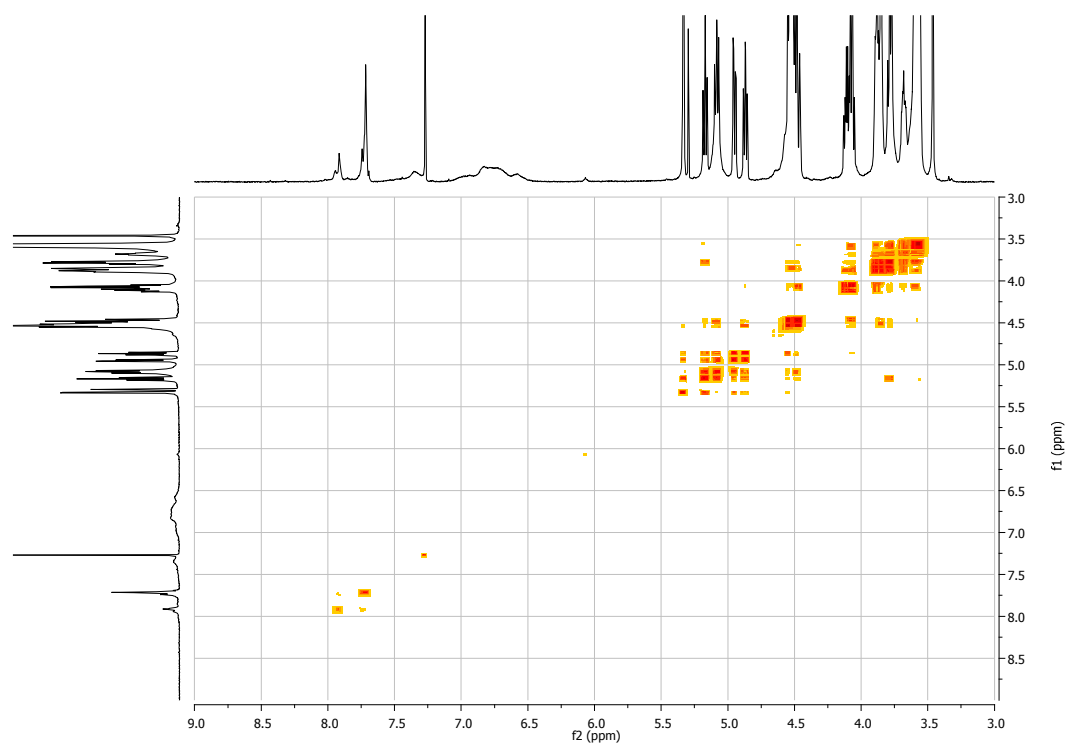

Figure S228. gCOSY spectrum of compound **S4**

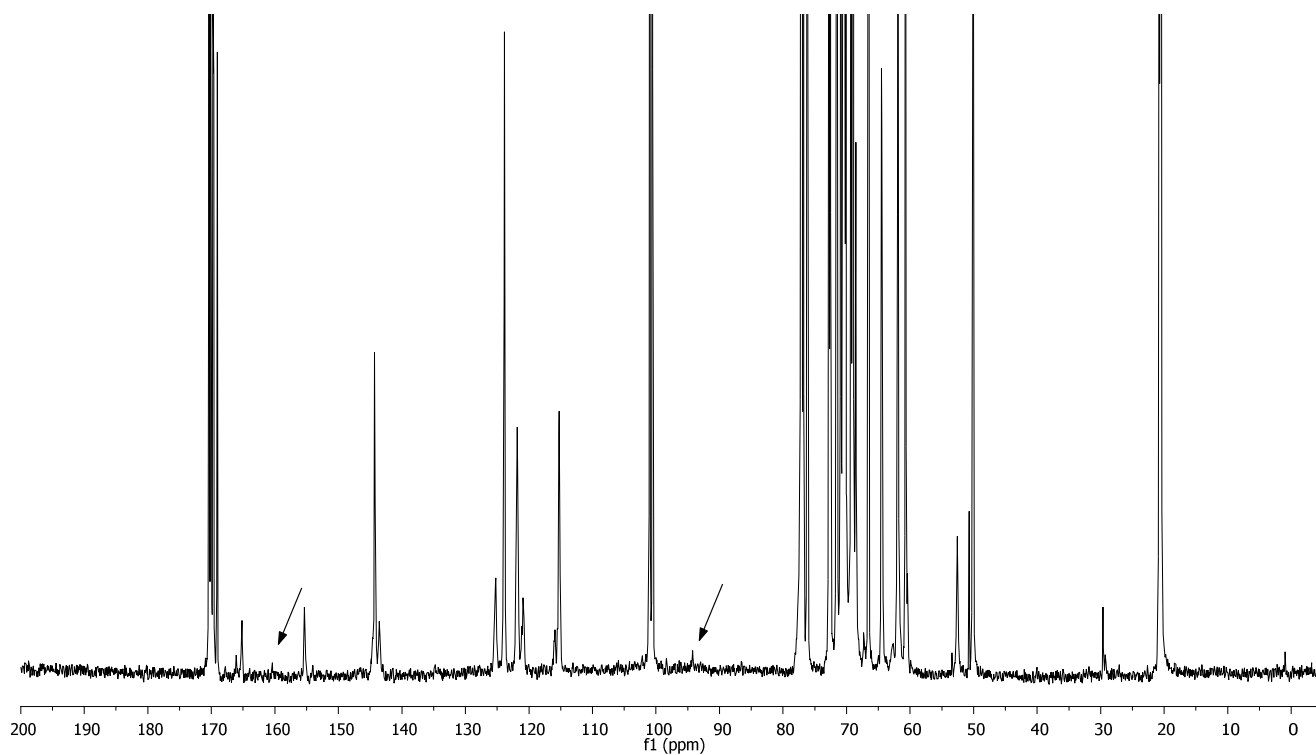

Figure S229.  $^{13}\text{C}$  NMR spectrum of compound **S4** ( $\text{CDCl}_3$ , 150MHz). Arrows indicated central  $C_{ar}\text{-O}$  and  $C_{ar}\text{H}$ .

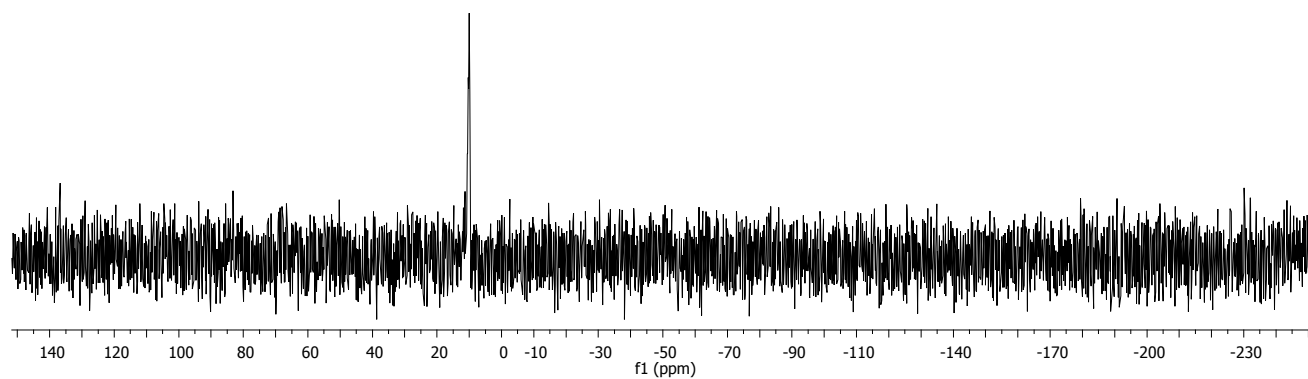

**Figure S230.**  $^{31}\text{P}$  NMR spectrum of compound **S4** ( $\text{CDCl}_3$ , 122MHz)

### 3. Diffusion NMR experiments

**NMR diffusion experiments:** NMR diffusion measurements were performed at 25°C on a Varian Inova Unity 600 spectrometer (Agilent, Santa Clara, CA, USA) operating at a frequency of 599.95 MHz for  $^1\text{H}$  using a 5mm broadband z-gradient temperature-regulated probe. The temperature was calibrated with 1,2-ethanediol according to a standard procedure.<sup>10</sup> The diffusion experiment employed a bipolar pulse-field gradient stimulated echo sequence as proposed by Wu et al.<sup>11</sup> Gradient pulse durations  $\delta$  were set between 3 and 5 ms while diffusion times ( $\Delta$ ) were 30 to 150 ms to ensure that the echo intensities were attenuated by at least 80%. A complete attenuation curve was obtained by measuring 30 gradient strengths, which were linearly incremented between 1.8 and 54.2 G/cm. Hard 90°  $^1\text{H}$  pulses of 15 $\mu\text{s}$  were used and 36 k data points were recorded with 16 scans acquired for each gradient strength. A recycle delay of 3.0 s was used. The gradient strength was calibrated by back calculation of the coil constant from diffusion experiments on a 20%  $\text{H}_2\text{O}/80\% \text{D}_2\text{O}$  standard ( $D = 1.97 \times 10^{-9} \text{ m}^2 \text{ s}^{-1}$ ).<sup>12</sup>

Diffusion rates were extracted from the slope of the straight lines obtained by plotting  $\ln(I)$  against the gradient-pulse power squared according to the following equation:  $\ln(I) = -D\gamma^2 G^2 \delta^2 (\Delta - \delta/2) + \ln(I_0)$  where  $I$  is the relative intensity of a chosen resonance ( $I = I_0 \exp[-D\gamma^2 G^2 \delta^2 (\Delta - \delta/2)]$ ),  $G$ =gradient strength,  $\gamma$ =proton gyromagnetic ratio,  $D$ =diffusion rate,  $\delta$ =gradient duration,  $\Delta$ =diffusion delay, and  $\tau$ =pulse length for bipolar pulses. All diffusion spectra were processed in MatNMR.<sup>13</sup>

The diffusion rates ( $D$ ) were calculated from the decay of the signal intensity with increasing field gradient strength of the  $H_{4\text{gal}}$  proton ( $\delta = 5.30$  ppm) for the samples in  $\text{CDCl}_3$  (acetylated conjugates) or the  $H_{\text{triazole}}$  proton ( $\delta = 7.90$  ppm) for the samples in  $\text{D}_2\text{O}$  (hydroxylated derivatives). In all cases, mono-exponential behavior was observed, resulting in a linear decay of the logarithm of the signal intensity as a function of the gradient strength squared. The linearity of the data was consistent with a monomolecular behavior in each case, confirming the absence of aggregation phenomena in aqueous solution.

The measurement of the diffusion rate ( $D$ ) allows calculating the solvodynamic diameter of a molecule.<sup>14</sup> The dendrimers are considered as spherical molecular objects, and characterized by an apparent diffusion coefficient  $D$ . The application of the Stokes-Einstein equation gives an estimate of the diameter of the molecule.

Stokes-Einstein equation:

$$D = K_B T / 6\pi\eta r_s$$

$D$ : Diffusion rate ( $\text{m}^2 \cdot \text{s}^{-1}$ );  $K_B$ : Boltzmann's constant ( $K_B = 1.38 \times 10^{-23} \text{ m}^2 \cdot \text{kg} \cdot \text{s}^{-2} \cdot \text{K}^{-1}$ );  $T$ : Temperature (K) ( $T = 298.15$  K);  $\eta$ : solvent viscosity in Pa s;  $r_s$ : Solvodynamic radius of the species.

<sup>10</sup> S. Berger and S. Braun, *200 and More NMR Experiments—A Practical Course*; Wiley-VCH: Weinheim, 2004; pp 145–148.

<sup>11</sup> D. H. Wu, A. D. Chen, C. S. and Johnson Jr., *J. Magn. Reson., Ser. A* 1995, **115**, 260–264.

<sup>12</sup> M. Holz and H. Weingärtner, *J. Magn. Reson.* 1991, **92**, 115–125.

<sup>13</sup> J. D. van Beek, *J. Magn. Reson.* 2007, **187**, 19–26.

<sup>14</sup> M. D. Diaz and Berger, *S. Carbohydr. Res.* 2000, **329**, 1–5.

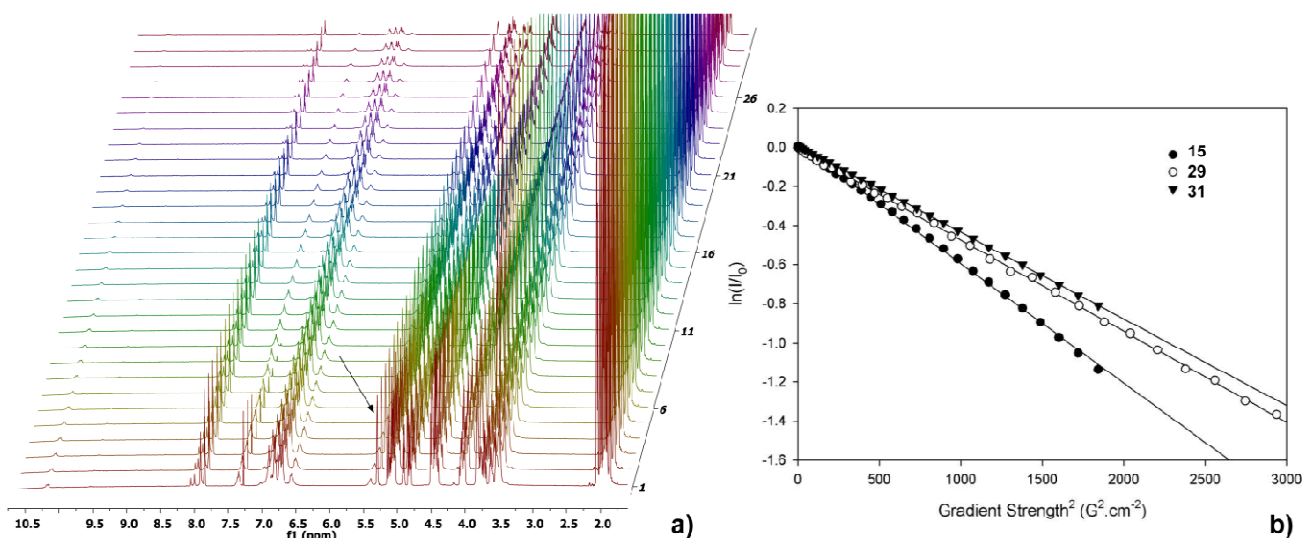

**Figure S231.** a) Decay of normalized  $^1\text{H}$  signal for the pentadecavalent dendron **31** in  $\text{CDCl}_3$  during the PFGSTE experiment. The gradient strength is increased linearly between 1.8 and  $54.2 \text{ G}\cdot\text{cm}^{-1}$ ; b) Characteristic echo decays of the  $H_{4\text{gal}}$  resonances ( $\delta = 5.30 \text{ ppm}$ ) as a function of squared gradient strength located in dendrons **15**, **29** and **31**. Such linear behavior was also obtained for the decay of the signal intensities of other protons located either in internal regions of the conjugates, including the dendritic core and connecting branches, or in the peripheral saccharidic belt (results not shown). Linear fits, which are plotted as solid lines and used to calculate self-diffusion coefficients, are characteristic of a single molecule and therefore rule out aggregation.

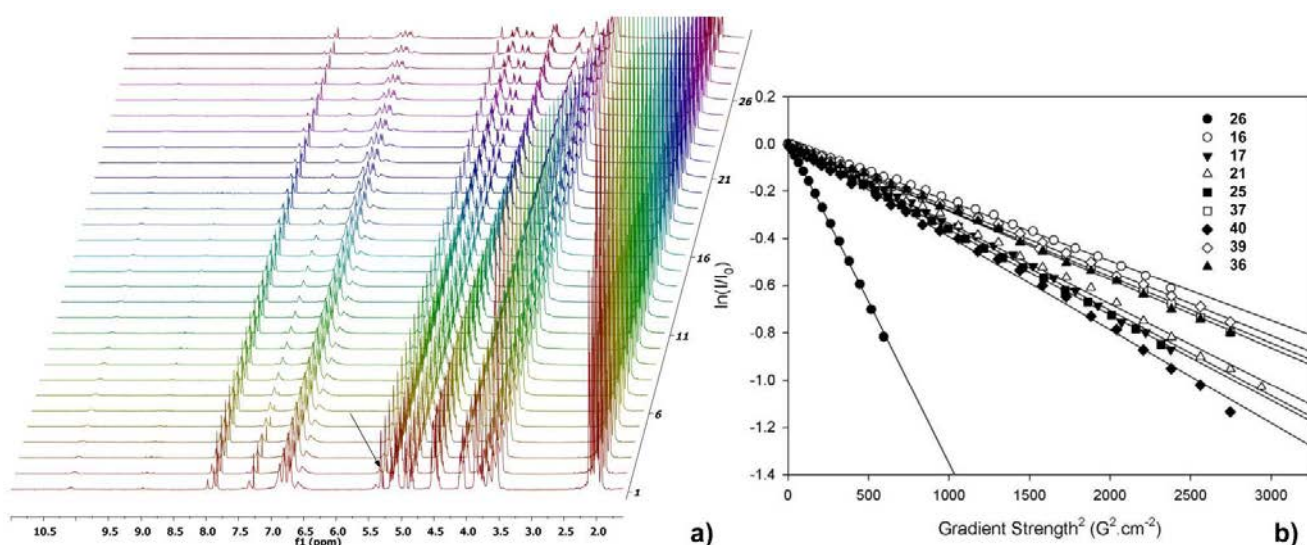

**Figure S232.** a) Decay of normalized  $^1\text{H}$  signal for the tricontavalent glycodendrimer **26** in  $\text{CDCl}_3$  during the PFGSTE experiment. The gradient strength is increased linearly between 1.8 and  $54.2 \text{ G}\cdot\text{cm}^{-1}$ ; b) Characteristic echo decays of the  $H_{4\text{gal}}$  resonances ( $\delta = 5.30 \text{ ppm}$ ) as a function of squared gradient strength located in lactosylated derivatives **26**, **16**, **17**, **21**, **25**, **37**, **40**, **39**, and **36**. Such linear behavior was also obtained for the decay of the signal intensities of other protons located either in internal regions of the conjugates, including the dendritic core and connecting branches, or in the peripheral saccharidic belt (results not shown). Linear fits, which are plotted as solid lines and used to calculate self-diffusion coefficients, are characteristic of a single molecule and therefore rule out aggregation.

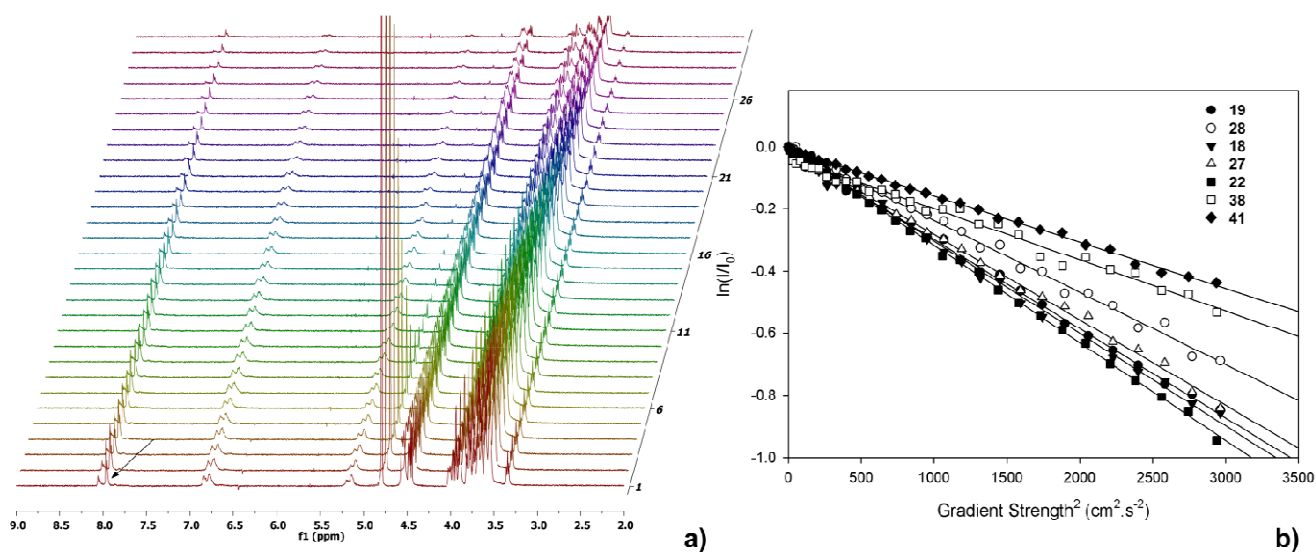

**Figure S233.** a) Decay of normalized  $^1\text{H}$  signal for the octadecaivalent hydroxylated glycodendrimer **19** in  $\text{D}_2\text{O}$  during the PFGSTE experiment. The gradient strength is increased linearly between 1.8 and  $54.2 \text{ G}\cdot\text{cm}^{-1}$ ; b) Characteristic echo decays of the  $H_{\text{triazole}}$  resonances ( $\delta = 7.90 \text{ ppm}$ ) as a function of squared gradient strength located in lactosylated derivatives **19**, **28**, **18**, **27**, **22**, **38**, and **41**. Such linear behavior was also obtained for the decay of the signal intensities of other protons located either in internal regions of the conjugates, including the dendritic core and connecting branches, or in the peripheral saccharidic belt (results not shown). Linear fits, which are plotted as solid lines and used to calculate self-diffusion coefficients, are characteristic of a single molecule and therefore rule out aggregation.



#### 4. Competitive Surface Plasmon Resonance Studies and Sensorgrams

**For LecA:** The studies were conducted using a Biacore T200 SPR instrument with a CM5 sensor chip. A continuous flow of HEPES buffer (10 mM HEPES and 150 mM NaCl, 2 mM CaCl<sub>2</sub>, pH 7.4) was maintained over the sensor surface at a flow rate of 10 µl/min. The CM5 sensor chip was activated with an injection of a solution containing *N*-ethyl-*N'*-(3-diethylaminopropyl) carbodiimide (EDC) (0.2 M) and *N*-hydroxysuccinimide (NHS) (0.05 M) for 7 minutes. Lactoside **42** (200 µg/mL) and Et<sub>3</sub>N (1 mM) in NaOAc buffer (pH 4.5) was injected over the activated flow cell at flow rate of 10 µl/min for 2 minute to achieve a ~230 RU immobilization. The immobilization procedure was completed by an injection of ethanolamine hydrochloride (1 M) (70 µL), followed by a flow of the buffer (100 µL/min.), in order to eliminate physically adsorbed compounds. Ethanol amine alone was used in one of the flow-cell as a reference. The solutions of pre incubated (1 h) mixtures of glycodendrimers or monomers (with the various concentrations) and a LecA lectin (1.5 µM) in running HEPES buffer are passed over flow cells of the lactoside and ethanol amine (Association: 3 min and dissociation: 3 min). The sensor chip was regenerated with the serial injections of D-lactose (0.25 M, 3 min), buffer (3 min), D-lactose (0.25 M, 3 min) and buffer (3 min). For each inhibition assay, LecA lectin (1.5 µM) without inhibitor was injected to observe the full adhesion of the lectin onto the sugar-coated surface (0% inhibition). Response units from the surface of lactoside were subtracted from the surface of ethanol amine to eliminate non-specific interactions, as well as, bulk change in RU due to variation in refractive index of the medium. The primary subtracted sensorgrams were analyzed by 1:1 Langmuir model fitting, using the BIAevaluation software. For IC<sub>50</sub> evaluation, the response units at the equilibrium was considered as the amount of lectin bound to the sugar surface in the presence of a defined concentration of inhibitor. Inhibition curves were obtained by plotting the percentage of inhibition against the inhibitor concentration (on a logarithmic scale) by using Origin 7.0 software (OriginLab Corp.) and IC<sub>50</sub> values were extracted from a sigmoidal fit of the inhibition curve. The error values are obtained from the fitting of exponential curve.

**For truncated hGal-3:** The studies were conducted using a Biacore T200 SPR instrument with a CM5 sensor chip. A continuous flow of standard PBS buffer (HyClone®, Phosphate Buffered Saline (10X) 0.067M (PO<sub>4</sub>), pH 7.4) was maintained over the sensor surface at a flow rate of 10 µl/min. The CM5 sensor chip was activated with an injection of a solution containing *N*-ethyl-*N'*-(3-diethylaminopropyl) carbodiimide (EDC) (0.2 M) and *N*-hydroxysuccinimide (NHS) (0.05 M) for 7 minutes. Lactoside **42** (200 µg/mL) and Et<sub>3</sub>N (1 mM) in NaOAc buffer (pH 4.5) was injected over the activated flow cell at flow rate of 10 µl/min for 2 minute to achieve a ~230 RU immobilization. The immobilization procedure was completed by an injection of ethanolamine hydrochloride (1 M) (70 µL), followed by a flow of the buffer (100 µL/min.), in order to eliminate physically adsorbed compounds. Ethanol amine alone was used in one of the flow-cell as a reference. The solutions of pre incubated (15 min) mixtures of glycodendrimer or monomers (with the various concentrations) and a truncated galectin-3 (7.5 µM) in running PBS buffer are passed over flow cells of the lactoside and ethanol amine (Association: 3 min and dissociation: 3 min). The sensor chip was regenerated with the serial injections of D-lactose (0.25 M, 3 min), buffer (3 min), D-lactose (0.25 M, 3 min) and buffer (3 min). For each inhibition assay, truncated hGal-3 (7.5 µM) without inhibitor was injected to observe the full adhesion of the lectin onto the sugar-coated surface (0% inhibition). Response units from the surface of lactoside were subtracted from the surface of

ethanol amine to eliminate non-specific interactions, as well as, bulk change in RU due to variation in refractive index of the medium. The primary subtracted sensorgrams were analyzed by 1:1 Langmuir model fitting, using the BIAevaluation software. For  $IC_{50}$  evaluation, the response units at the equilibrium was considered as the amount of lectin bound to the sugar surface in the presence of a defined concentration of inhibitor. Inhibition curves were obtained by plotting the percentage of inhibition against the inhibitor concentration (on a logarithmic scale) by using Origin 7.0 software (OriginLab Corp.) and  $IC_{50}$  values were extracted from a sigmoidal fit of the inhibition curve. The error values are obtained from the fitting of exponential curve.

### Sensorgrams and inhibitory curves with LecA

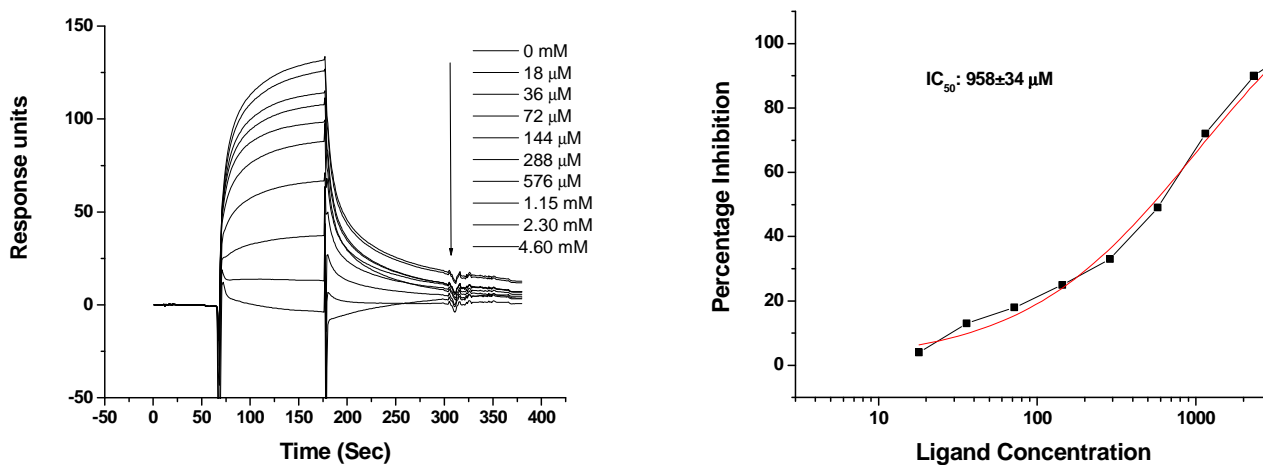

**Figure S234.** (left) Sensorgrams obtained by injection of LecA (1.5  $\mu\text{M}$ ) lectin incubated with different concentrations of monomeric **43** varying from 18  $\mu\text{M}$  (top curve) to 4.60 mM (bottom curve) on the surface of immobilized lactoside **42**. (right) The inhibitory curve for the compound **43**.

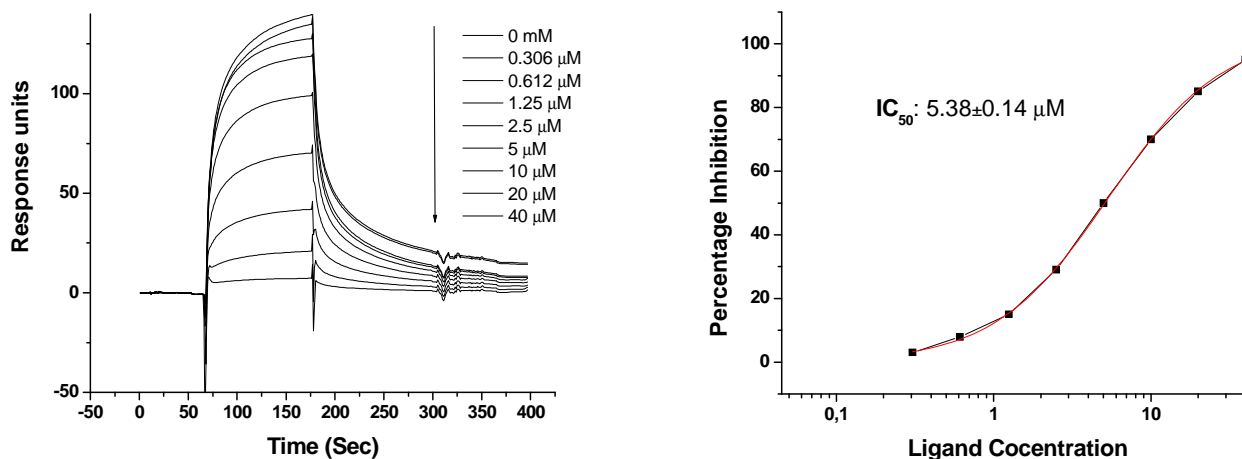

**Figure S235.** (left) Sensorgrams obtained by injection of LecA (1.5  $\mu\text{M}$ ) lectin incubated with different concentrations of hexavalent **18** varying from 0.306  $\mu\text{M}$  (top curve) to 40  $\mu\text{M}$  (bottom curve) on the surface of immobilized lactoside **42**. (right) The inhibitory curve for the compound **18**.

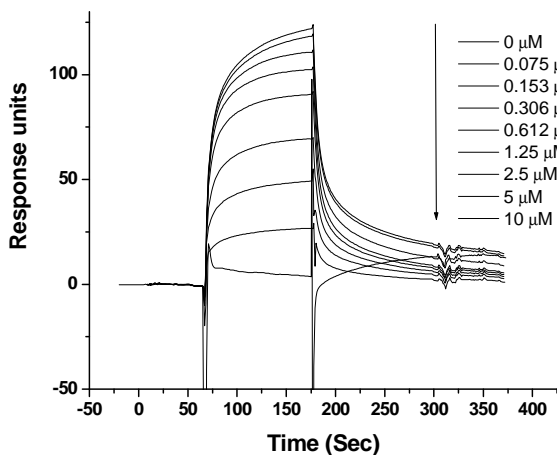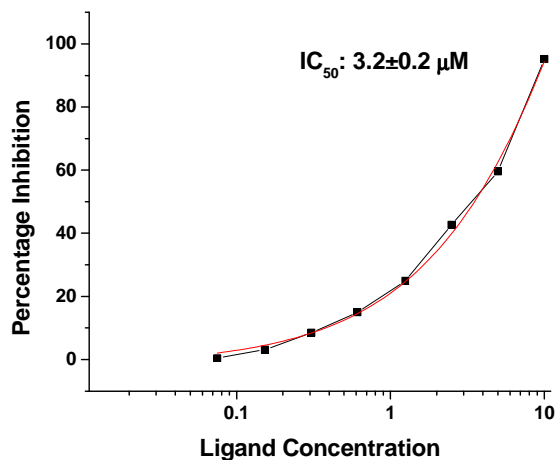

**Figure S236.** (left) Sensorgrams obtained by injection of LecA (1.5 μM) lectin incubated with different concentrations of decavalent **22** varying from 0.075 μM (top curve) to 10 μM (bottom curve) on the surface of immobilized lactoside **42**. (right) The inhibitory curve for the compound **22**.

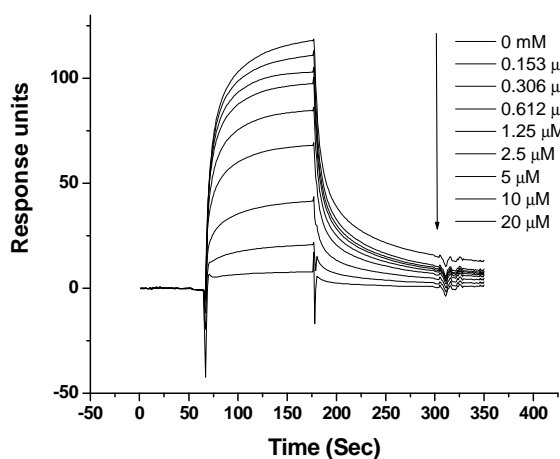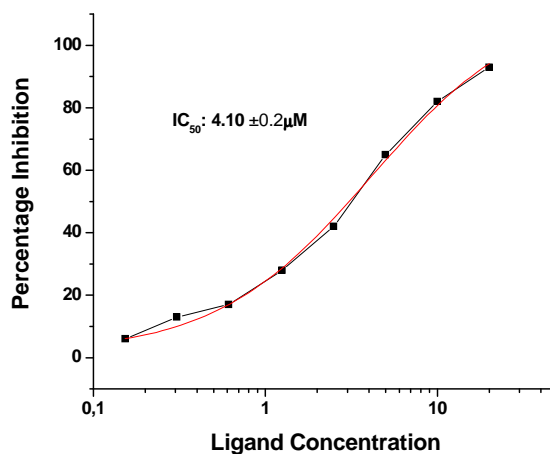

**Figure S237.** (left) Sensorgrams obtained by injection of LecA (1.5 μM) lectin incubated with different concentrations of pentadecaivalent **27** varying from 0.153 μM (top curve) to 20 μM (bottom curve) on the surface of immobilized lactoside **42**. (right) The inhibitory curve for the compound **27**.

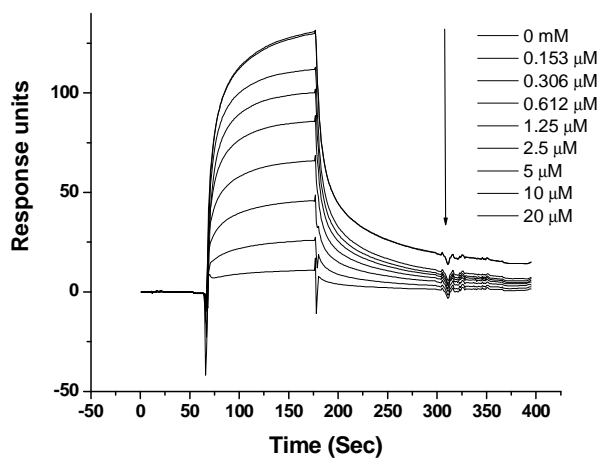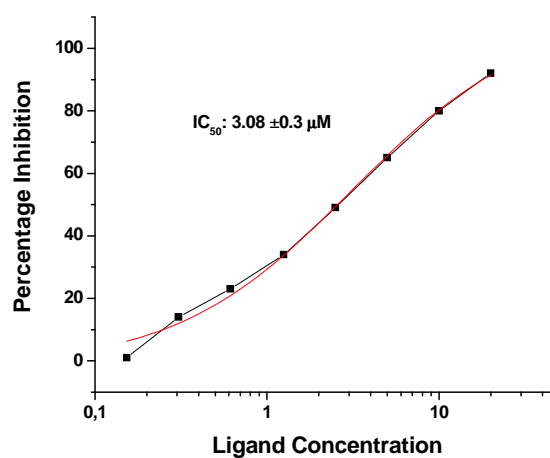

**Figure S238.** (left) Sensorgrams obtained by injection of LecA (1.5 μM) lectin incubated with different concentrations of octadecaivalent **19** varying from 0.153 μM (top curve) to 20 μM (bottom curve) on the surface of immobilized lactoside **42**. (right) The inhibitory curve for the compound **19**.

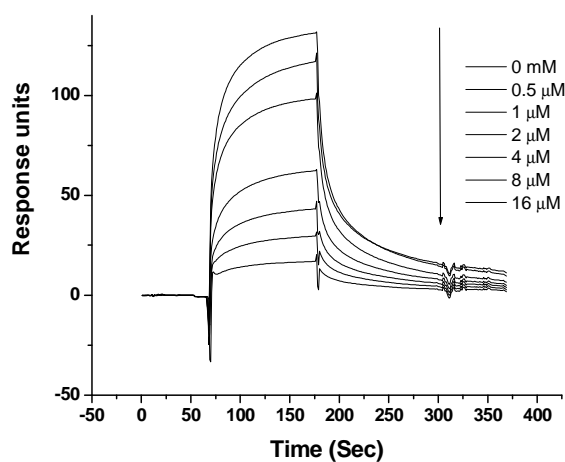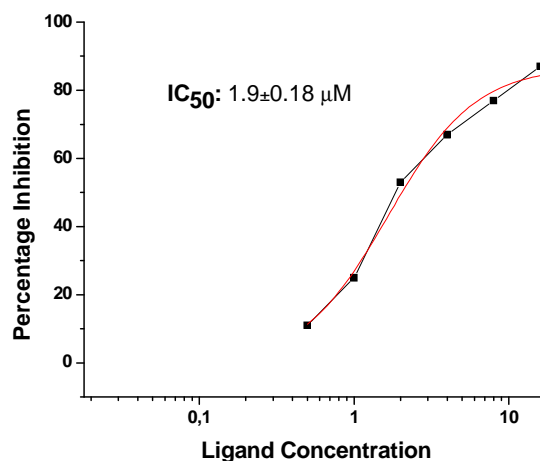

**Figure S239.** (left) Sensorgrams obtained by injection of LecA (1.5 μM) lectin incubated with different concentrations of trivalent **28** varying from 0.5 μM (top curve) to 16 μM (bottom curve) on the surface of immobilized lactoside **42**. (right) The inhibitory curve for the compound **28**.

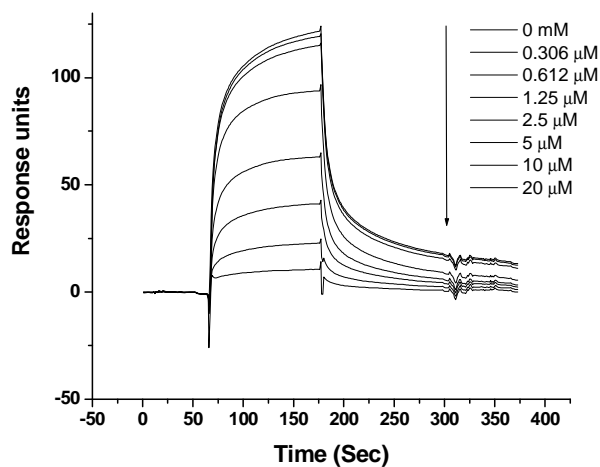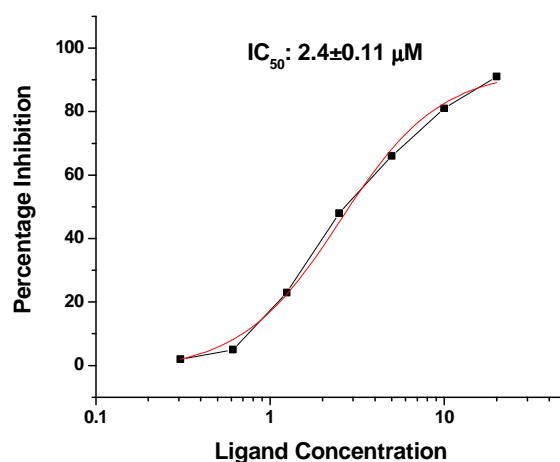

**Figure S240.** (left) Sensorgrams obtained by injection of LecA (1.5  $\mu M$ ) lectin incubated with different concentrations of trivalent **38** varying from 0.306  $\mu M$  (top curve) to 20  $\mu M$  (bottom curve) on the surface of immobilized lactoside **42**. (right) The inhibitory curve for the compound **38**.

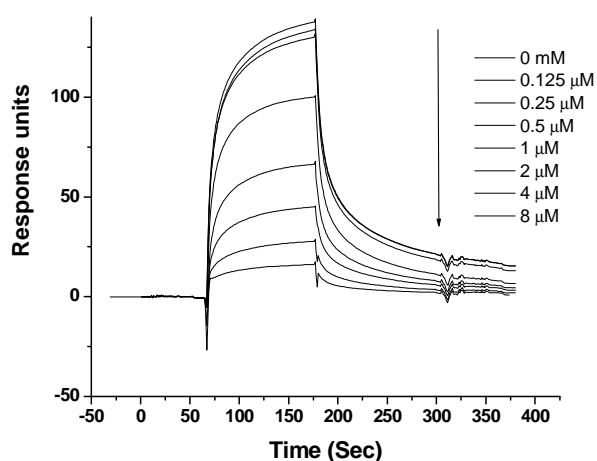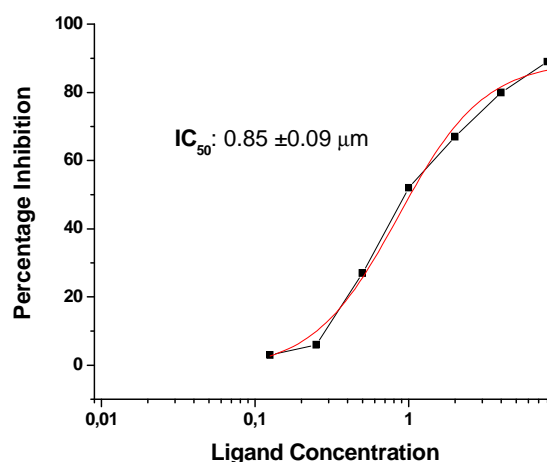

**Figure S241.** (left) Sensorgrams obtained by injection of LecA (1.5  $\mu M$ ) lectin incubated with different concentrations of nonavalent **41** varying from 0.125  $\mu M$  (top curve) to 8  $\mu M$  (bottom curve) on the surface of immobilized lactoside **42**. (right) The inhibitory curve for the compound **41**.

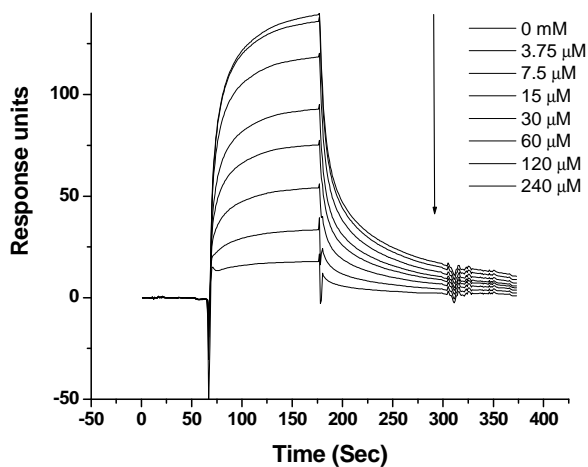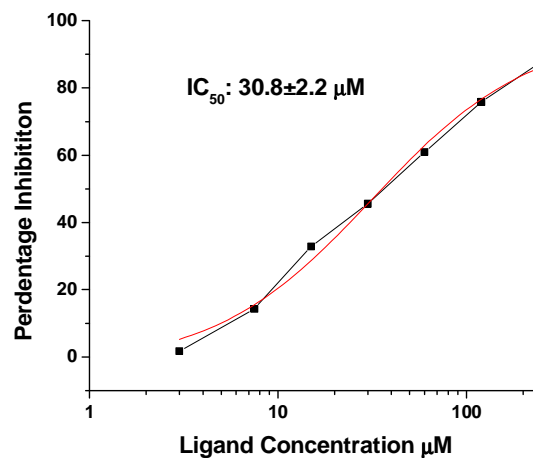

**Figure S242.** (left) Sensorgrams obtained by injection of LecA (1.5  $\mu\text{M}$ ) lectin incubated with different concentrations of "short" hexavalent reference (containing 6 Lactoside but without PEG chains) varying from 3.75  $\mu\text{M}$  (top curve) to 240  $\mu\text{M}$  (bottom curve) on the surface of immobilized lactoside **42**. (right) The inhibitory curve for this compound.

**Sensorgrams and inhibitory curves with truncated hGal-3**

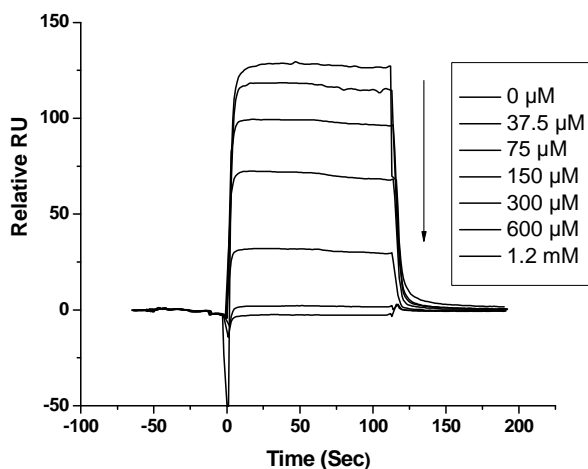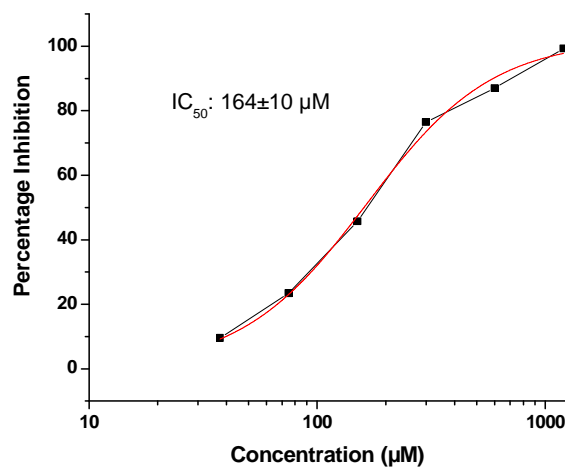

**Figure S243.** (left) Sensorgrams obtained by injection of truncated hGal-3 (7.5  $\mu\text{M}$ ) lectin incubated with different concentrations of monomeric **43** varying from 37.5  $\mu\text{M}$  (top curve) to 1.2 mM (bottom curve) on the surface of immobilized lactoside **42**. (right) The inhibitory curve for the compound **43**.

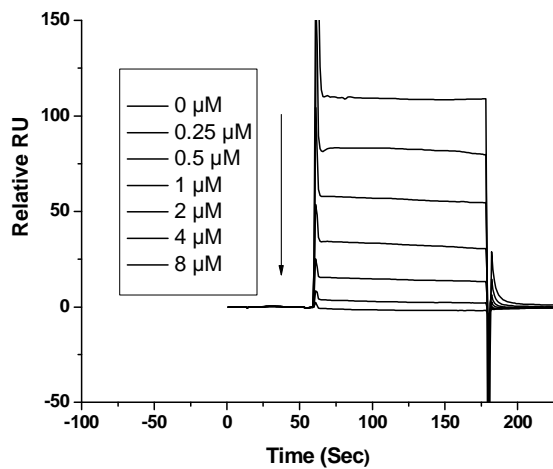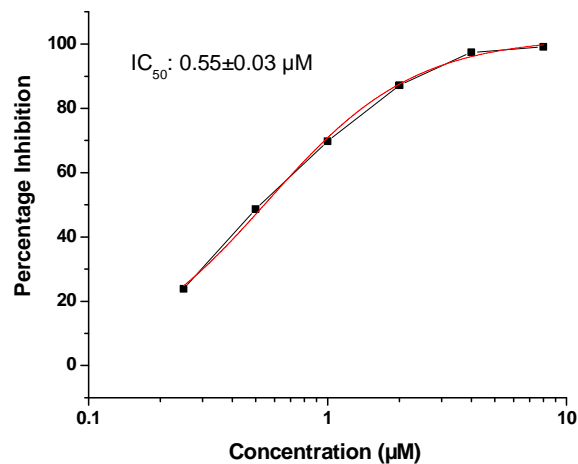

**Figure S244.** (left) Sensorgrams obtained by injection of truncated hGal-3 (7.5 μM) lectin incubated with different concentrations of hexavalent **18** varying from 0.25 μM (top curve) to 8 μM (bottom curve) on the surface of immobilized lactoside **42**. (right) The inhibitory curve for the compound **18**.

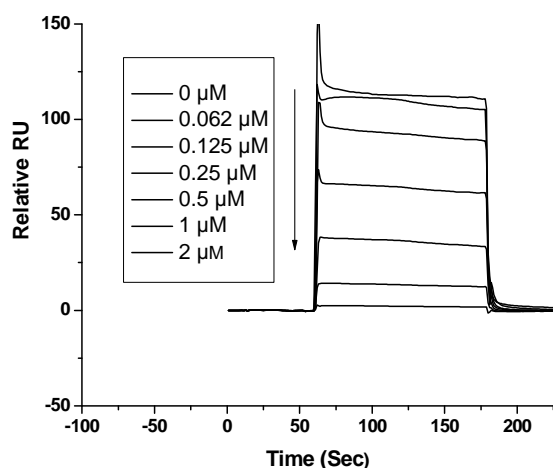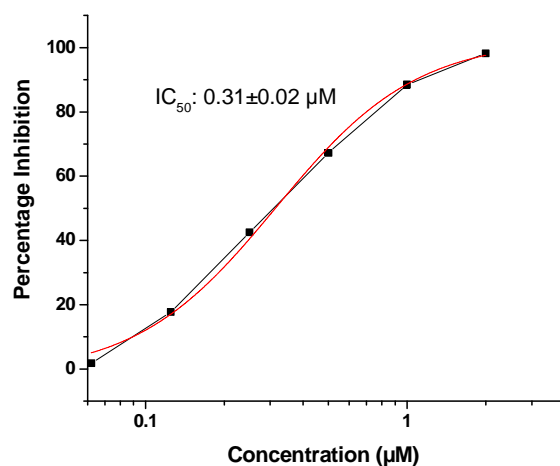

**Figure S245.** (left) Sensorgrams obtained by injection of truncated hGal-3 (7.5 μM) lectin incubated with different concentrations of decavalent **22** varying from 0.062 μM (top curve) to 2 μM (bottom curve) on the surface of immobilized lactoside **42**. (right) The inhibitory curve for the compound **22**.

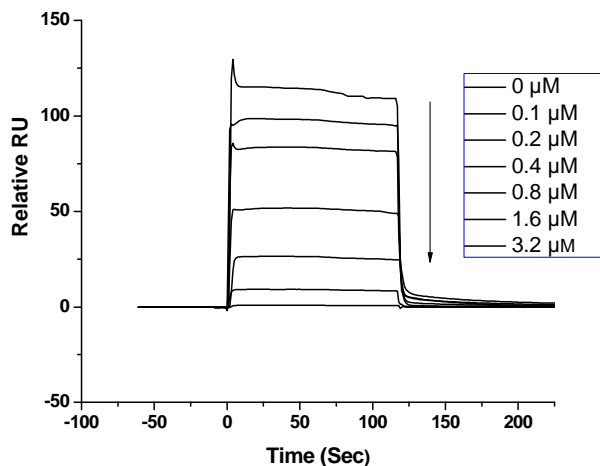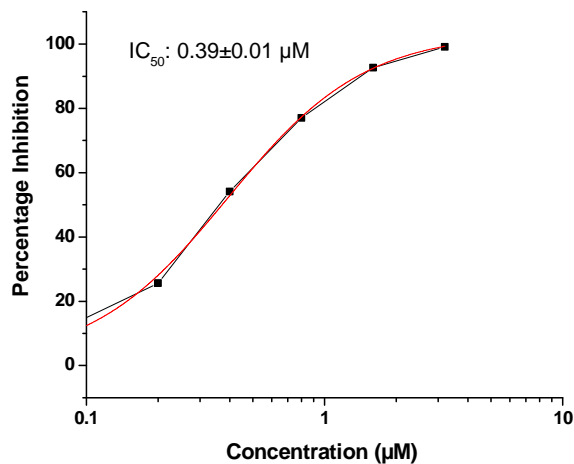

**Figure S246.** (left) Sensorgrams obtained by injection of truncated hGal-3 (7.5 μM) lectin incubated with different concentrations of pentadecaivalent **27** varying from 0.1 μM (top curve) to 3.2 μM (bottom curve) on the surface of immobilized lactoside **42**. (right) The inhibitory curve for the compound **27**.

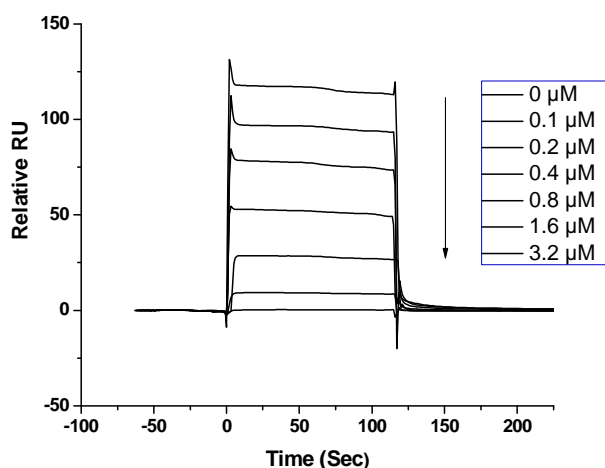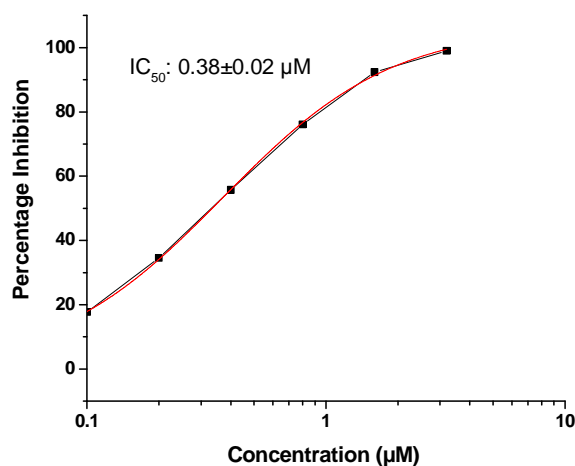

**Figure S247.** (left) Sensorgrams obtained by injection of truncated hGal-3 (7.5 μM) lectin incubated with different concentrations of octadecaivalent **19** varying from 0.1 μM (top curve) to 3.2 μM (bottom curve) on the surface of immobilized lactoside **42**. (right) The inhibitory curve for the compound **19**.



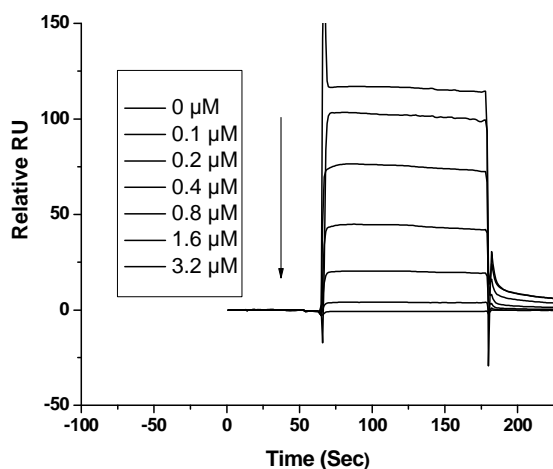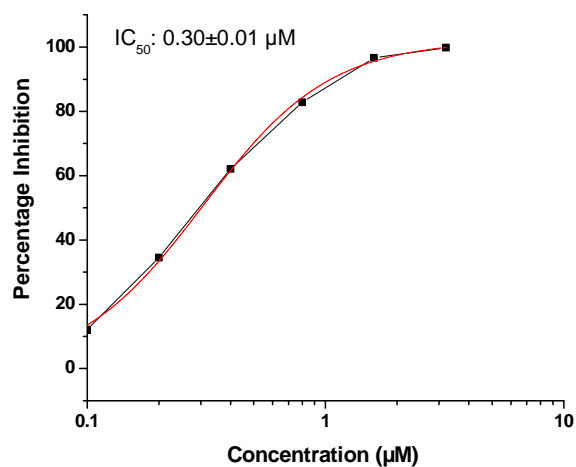

**Figure S248.** (left) Sensorgrams obtained by injection of truncated hGal-3 (7.5 μM) lectin incubated with different concentrations of trivalent **28** varying from 0.1 μM (top curve) to 3.2 μM (bottom curve) on the surface of immobilized lactoside **42**. (right) The inhibitory curve for the compound **28**.

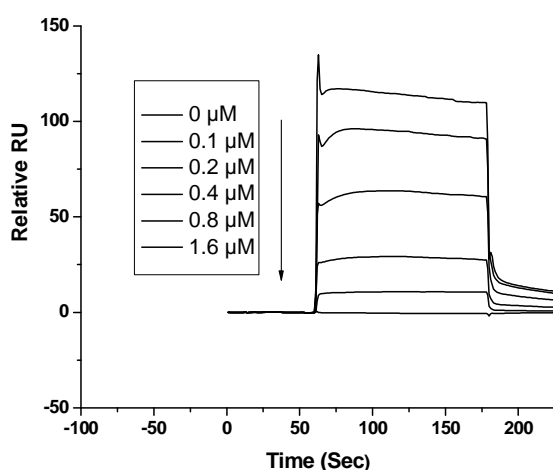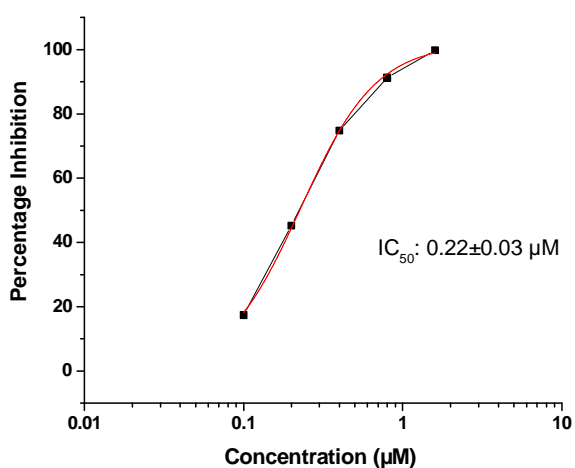

**Figure S249.** (left) Sensorgrams obtained by injection of truncated hGal-3 (7.5 μM) lectin incubated with different concentrations of trivalent **38** varying from 0.1 μM (top curve) to 1.6 μM (bottom curve) on the surface of immobilized lactoside **42**. (right) The inhibitory curve for the compound **38**.

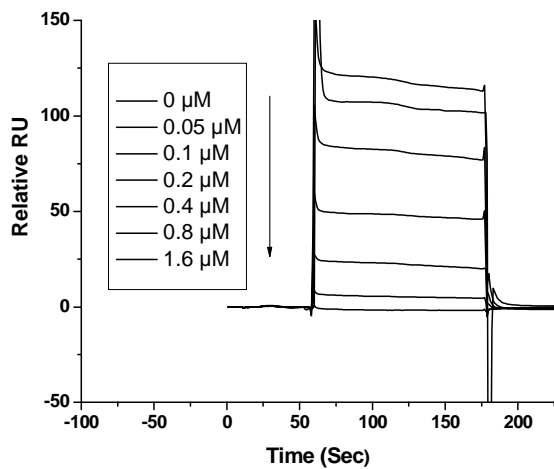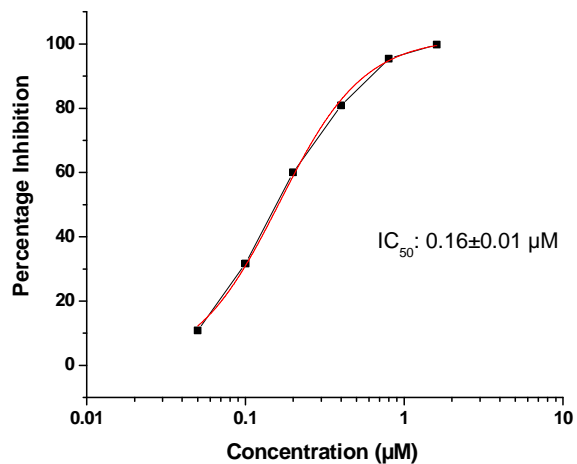

**Figure S250.** (left) Sensorgrams obtained by injection of truncated hGal-3 (7.5  $\mu M$ ) lectin incubated with different concentrations of nonacontavalent **41** varying from 0.05  $\mu M$  (top curve) to 1.6  $\mu M$  (bottom curve) on the surface of immobilized lactoside **42**. (right) The inhibitory curve for the compound **41**.

## 5. X-Ray crystallographic analysis

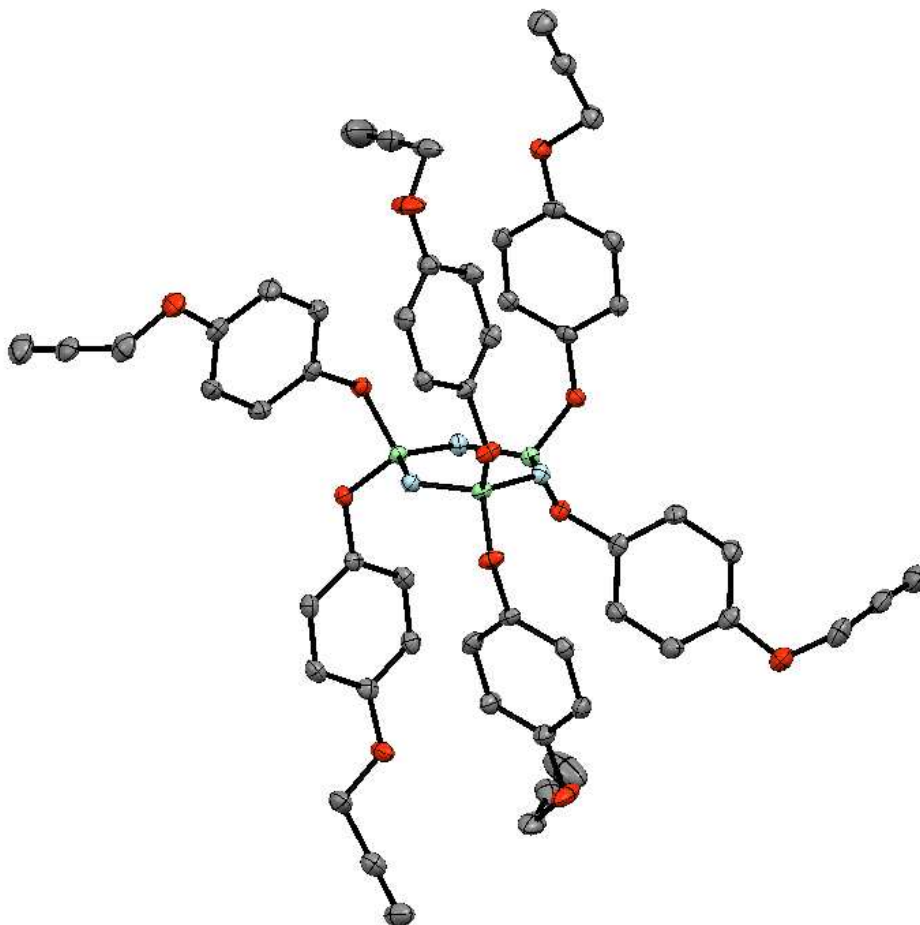

**Figure S251.** ORTEP at 50% thermal ellipsoid probability of the elementary unit cell of **1**. Hydrogen atoms are omitted for clarity.

### Crystal Structure Report for **1**

A colorless plate-like specimen of  $C_{27}H_{21}N_{1.50}O_6P_{1.50}$ , approximate dimensions 0.120 mm  $\times$  0.418 mm  $\times$  0.583 mm, was used for X-ray crystallographic analysis on a Bruker APEX DUO using Molybdenum radiation (0.71073 Å wavelength) at 150K. A total of 1464 frames were collected. The total exposure time was 4.07 hours. The frames were integrated with the Bruker SAINT software package using a narrow-frame algorithm. The integration of the data using a monoclinic unit cell yielded a total of 14096 reflections to a maximum  $\theta$  angle of 27.67° (0.77 Å resolution), of which 5478 were independent (average redundancy 2.573, completeness = 99.3%,  $R_{int} = 2.64\%$ ) and 5004 (91.35%) were greater than  $2\sigma(F^2)$ . The final cell constants of  $a = 18.901(2)$  Å,  $b = 7.5595(9)$  Å,  $c = 17.833(2)$  Å,  $\beta = 111.235(2)^\circ$ ; volume = 2375.0(5) Å<sup>3</sup>, are based upon the refinement of the XYZ-centroids of 5832 reflections above  $20 \sigma(I)$  with  $4.624^\circ < 2\theta < 55.03^\circ$ . Data were corrected for absorption effects using the multi-scan method (SADABS). The ratio of minimum to maximum apparent transmission was 0.948. The calculated minimum and maximum transmission coefficients (based on crystal size) are 0.7066 and 0.7456. The structure was solved and refined using the Bruker

SHELXTL Software Package, using the space group C 1 2 1 (C2, #5), with Z = 4 for the formula unit, C<sub>27</sub>H<sub>21</sub>N<sub>1.50</sub>O<sub>6</sub>P<sub>1.50</sub>. The final anisotropic full-matrix least-squares refinement on F<sup>2</sup> with 326 variables converged at R1 = 3.10%, for the observed data and wR2 = 6.93% for all data. The goodness-of-fit was 1.022. The largest peak in the final difference electron density synthesis was 0.213 e<sup>-</sup>/Å<sup>3</sup> and the largest hole was -0.296 e<sup>-</sup>/Å<sup>3</sup> with an RMS deviation of 0.041 e<sup>-</sup>/Å<sup>3</sup>. On the basis of the final model, the calculated density was 1.423 g/cm<sup>3</sup> and F(000), 1056 e<sup>-</sup>.

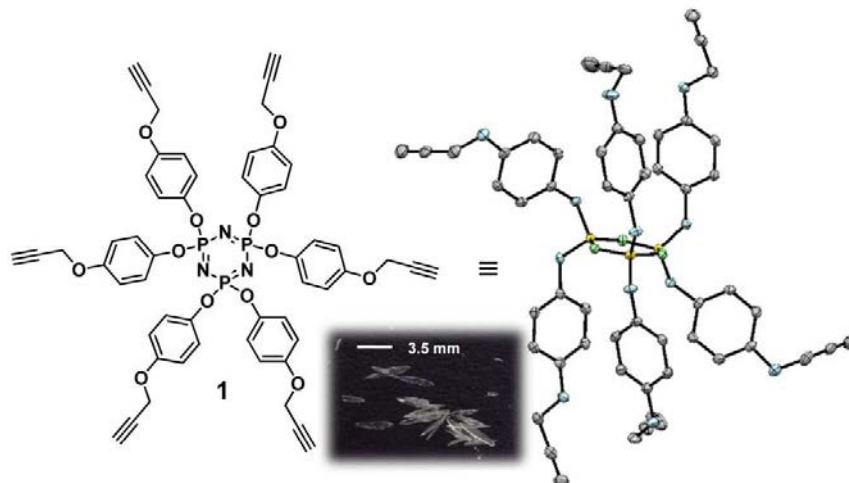


---

|                                                               |                   |                                 |             |
|---------------------------------------------------------------|-------------------|---------------------------------|-------------|
| Bond precision:                                               | C-C = 0.0038 Å    | Wavelength=0.71073              |             |
| Cell:                                                         | a=18.901(2)       | b=7.5595(9)                     | c=17.833(2) |
|                                                               | a-pha=90          | beta=111.235(2)                 | gamma=90    |
| Temperature:                                                  | 150 K             |                                 |             |
|                                                               | Calculated        | Reported                        |             |
| Volume                                                        | 2375.0(5)         | 2374.9(5)                       |             |
| Space group                                                   | C 2               | C 2                             |             |
| Hall group                                                    | C 2y              | C 2y                            |             |
| Moiety formula                                                | C54 H42 N3 O12 P3 | C27 H21 N1.50 O6 P1.50          |             |
| Sum. formula                                                  | C54 H42 N3 O12 P3 | C27 H21 N1.50 O6 P1.50          |             |
| Mr                                                            | 1017.82           | 508.91                          |             |
| Dx, g cm-3                                                    | 1.423             | 1.423                           |             |
| Z                                                             | 2                 | 4                               |             |
| Mu (mm-1)                                                     | 0.196             | 0.196                           |             |
| F000                                                          | 1056.0            | 1056.0                          |             |
| F000'                                                         | 1057.12           |                                 |             |
| h,k,lmax                                                      | 24,9,23           | 24,9,23                         |             |
| Nref                                                          | 5572( 2998)       | 5478                            |             |
| Tmin, Tmax                                                    | 0.906, 0.977      | 0.707, 0.746                    |             |
| Tmin'                                                         | 0.892             |                                 |             |
| Correction method= # Reported T Limits: Tmin=0.707 Tmax=0.746 |                   |                                 |             |
| AbsCorr = MULTI-SCAN                                          |                   |                                 |             |
| Data completeness=                                            | 1.03/0.98         | Tcta(max)= 27.669               |             |
| R(reflections)=                                               | 0.0310( 5004)     | wR2(reflections)= 0.0693( 5478) |             |
| S =                                                           | 1.022             | Npar= 326                       |             |

---

**Table S1.** Information on sample, data collection and structure refinement for **1**.

|                                     |                                                       |                                                                          |
|-------------------------------------|-------------------------------------------------------|--------------------------------------------------------------------------|
| Chemical formula                    | $C_{27}H_{21}N_{1.50}O_6P_{1.50}$                     |                                                                          |
| Formula weight                      | 508.91 g/mol                                          |                                                                          |
| Temperature                         | 150(2) K                                              |                                                                          |
| Wavelength                          | 0.71073 Å                                             |                                                                          |
| Crystal size                        | 0.120 x 0.418 x 0.583 mm                              |                                                                          |
| Crystal habit                       | colorless plate                                       |                                                                          |
| Crystal system                      | monoclinic                                            |                                                                          |
| Space group                         | C 1 2 1                                               |                                                                          |
| Unit cell dimensions                | a = 18.901(2) Å<br>b = 7.5595(9) Å<br>c = 17.833(2) Å | $\alpha = 90^\circ$<br>$\beta = 111.235(2)^\circ$<br>$\gamma = 90^\circ$ |
| Volume                              | 2375.0(5) Å <sup>3</sup>                              |                                                                          |
| Z                                   | 4                                                     |                                                                          |
| Density (calculated)                | 1.423 g/cm <sup>3</sup>                               |                                                                          |
| Absorption coefficient              | 0.196 mm <sup>-1</sup>                                |                                                                          |
| F(000)                              | 1056                                                  |                                                                          |
| Theta range for data collection     | 1.23 to 27.67°                                        |                                                                          |
| Index ranges                        | -24<=h<=24, -9<=k<=9, -23<=l<=23                      |                                                                          |
| Reflections collected               | 14096                                                 |                                                                          |
| Independent reflections             | 5478 [R(int) = 0.0264]                                |                                                                          |
| Coverage of independent reflections | 99.3%                                                 |                                                                          |
| Absorption correction               | multi-scan                                            |                                                                          |
| Max. and min. transmission          | 0.7456 and 0.7066                                     |                                                                          |
| Structure solution technique        | direct methods                                        |                                                                          |
| Structure solution program          | SHELXS-97 (Sheldrick, 2008)                           |                                                                          |
| Refinement method                   | Full-matrix least-squares on F <sup>2</sup>           |                                                                          |
| Refinement program                  | SHELXL-2013 (Sheldrick, 2013)                         |                                                                          |
| Function minimized                  | $\Sigma w(F_o^2 - F_c^2)^2$                           |                                                                          |
| Data / restraints / parameters      | 5478 / 1 / 326                                        |                                                                          |
| Goodness-of-fit on F <sup>2</sup>   | 1.022                                                 |                                                                          |
| $\Delta/\sigma_{\max}$              | 0.001                                                 |                                                                          |
| Final R indices                     | 5004 data; I>2σ(I)<br>all data                        | R1 = 0.0310, wR2 = 0.0667<br>R1 = 0.0366, wR2 = 0.0693                   |
| Weighting scheme                    | $w=1/[\sigma^2(F_o^2)+(0.0329P)^2+0.6412P]$           |                                                                          |
| Absolute structure parameter        | 0.1(0)                                                |                                                                          |
| Largest diff. peak and hole         | 0.213 and -0.296 eÅ <sup>-3</sup>                     |                                                                          |
| R.M.S. deviation from mean          | 0.041 eÅ <sup>-3</sup>                                |                                                                          |

**Table S2.** Atomic coordinates and equivalent isotropic atomic displacement parameters ( $\text{\AA}^2$ ) for **1**.  
 $U(\text{eq})$  is defined as one third of the trace of the orthogonalized  $U_{ij}$  tensor.

|     | <b>x/a</b>  | <b>y/b</b>  | <b>z/c</b>  | <b>U(eq)</b> |
|-----|-------------|-------------|-------------|--------------|
| P1  | 0.5         | 0.44796(10) | 0.5         | 0.01529(18)  |
| P2  | 0.56920(3)  | 0.12904(8)  | 0.56291(3)  | 0.01511(13)  |
| O1  | 0.43407(11) | 0.5366(3)   | 0.84159(11) | 0.0392(5)    |
| O2  | 0.47457(9)  | 0.5908(2)   | 0.55014(9)  | 0.0208(4)    |
| O3  | 0.57376(9)  | 0.0657(2)   | 0.64912(9)  | 0.0189(4)    |
| O4  | 0.73128(10) | 0.3698(3)   | 0.94575(10) | 0.0307(4)    |
| O5  | 0.64702(9)  | 0.0459(2)   | 0.56383(9)  | 0.0185(3)    |
| O6  | 0.73530(9)  | 0.0805(2)   | 0.30021(10) | 0.0250(4)    |
| N1  | 0.57058(11) | 0.3380(2)   | 0.55677(12) | 0.0173(4)    |
| N2  | 0.5         | 0.0275(4)   | 0.5         | 0.0176(6)    |
| C1  | 0.4482(2)   | 0.0901(7)   | 0.8859(2)   | 0.0698(13)   |
| C2  | 0.41918(16) | 0.2305(5)   | 0.87093(18) | 0.0413(7)    |
| C3  | 0.38492(17) | 0.4062(4)   | 0.85576(17) | 0.0353(7)    |
| C4  | 0.44249(14) | 0.5345(4)   | 0.76777(15) | 0.0241(5)    |
| C5  | 0.49528(13) | 0.6538(3)   | 0.75968(14) | 0.0230(5)    |
| C6  | 0.50670(13) | 0.6666(3)   | 0.68761(14) | 0.0196(5)    |
| C7  | 0.46537(13) | 0.5594(3)   | 0.62387(13) | 0.0173(5)    |
| C8  | 0.61731(12) | 0.1472(3)   | 0.72243(13) | 0.0185(5)    |
| C9  | 0.58092(13) | 0.1761(3)   | 0.77627(14) | 0.0232(5)    |
| C10 | 0.62149(14) | 0.2494(4)   | 0.85069(15) | 0.0275(6)    |
| C11 | 0.69723(15) | 0.2937(3)   | 0.87079(14) | 0.0228(5)    |
| C12 | 0.80545(16) | 0.4430(4)   | 0.96475(16) | 0.0323(6)    |
| C13 | 0.86563(16) | 0.3102(4)   | 0.99559(15) | 0.0304(6)    |
| C14 | 0.91374(17) | 0.2044(5)   | 0.02319(16) | 0.0406(7)    |
| C15 | 0.66949(13) | 0.0541(3)   | 0.49653(14) | 0.0173(5)    |
| C16 | 0.62500(13) | 0.9803(3)   | 0.42358(14) | 0.0195(5)    |
| C17 | 0.65023(13) | 0.9886(3)   | 0.35964(15) | 0.0209(5)    |
| C18 | 0.71914(13) | 0.0683(3)   | 0.36929(14) | 0.0199(5)    |
| C19 | 0.80514(14) | 0.1635(4)   | 0.30645(15) | 0.0263(6)    |
| C20 | 0.80208(14) | 0.2071(3)   | 0.22548(15) | 0.0258(6)    |
| C21 | 0.80047(16) | 0.2484(4)   | 0.16158(17) | 0.0362(7)    |
| C22 | 0.76514(12) | 0.1327(4)   | 0.44404(13) | 0.0218(5)    |
| C23 | 0.73919(12) | 0.1275(4)   | 0.50782(14) | 0.0204(5)    |
| C24 | 0.73338(14) | 0.2623(3)   | 0.81697(14) | 0.0241(5)    |
| C25 | 0.69281(14) | 0.1885(3)   | 0.74190(14) | 0.0231(5)    |
| C26 | 0.40214(14) | 0.4266(3)   | 0.70432(14) | 0.0237(5)    |
| C27 | 0.41313(14) | 0.4403(3)   | 0.63109(14) | 0.0225(5)    |

**Table S3.** Bond lengths (Å) for **1**.

|         |            |         |            |
|---------|------------|---------|------------|
| P1-O2   | 1.5839(16) | P1-O2   | 1.5839(16) |
| P1-N1   | 1.587(2)   | P1-N1   | 1.587(2)   |
| P2-N2   | 1.5799(14) | P2-O3   | 1.5825(16) |
| P2-N1   | 1.584(2)   | P2-O5   | 1.5943(16) |
| O1-C4   | 1.382(3)   | O1-C3   | 1.438(3)   |
| O2-C7   | 1.407(3)   | O3-C8   | 1.410(3)   |
| O4-C11  | 1.382(3)   | O4-C12  | 1.429(3)   |
| O5-C15  | 1.412(3)   | O6-C18  | 1.375(3)   |
| O6-C19  | 1.429(3)   | N2-P2   | 1.5798(14) |
| C1-C2   | 1.180(5)   | C1-H1   | 0.95       |
| C2-C3   | 1.459(5)   | C3-H19  | 0.99       |
| C3-H18  | 0.99       | C4-C26  | 1.379(3)   |
| C4-C5   | 1.391(3)   | C5-C6   | 1.382(3)   |
| C5-H3   | 0.95       | C6-C7   | 1.384(3)   |
| C6-H4   | 0.95       | C7-C27  | 1.376(3)   |
| C8-C25  | 1.377(3)   | C8-C9   | 1.386(3)   |
| C9-C10  | 1.385(3)   | C9-H12  | 0.95       |
| C10-C11 | 1.385(4)   | C10-H17 | 0.95       |
| C11-C24 | 1.385(3)   | C12-C13 | 1.466(4)   |
| C12-H15 | 0.99       | C12-H16 | 0.99       |
| C13-C14 | 1.177(4)   | C14-H2  | 0.95       |
| C15-C23 | 1.375(3)   | C15-C16 | 1.385(3)   |
| C16-C17 | 1.387(3)   | C16-H5  | 0.95       |
| C17-C18 | 1.388(3)   | C17-H6  | 0.95       |
| C18-C22 | 1.389(3)   | C19-C20 | 1.462(3)   |
| C19-H9  | 0.99       | C19-H8  | 0.99       |
| C20-C21 | 1.171(4)   | C21-H7  | 0.95       |
| C22-C23 | 1.393(3)   | C22-H11 | 0.95       |
| C23-H10 | 0.95       | C24-C25 | 1.396(3)   |
| C24-H13 | 0.95       | C25-H14 | 0.95       |
| C26-C27 | 1.398(3)   | C26-H20 | 0.95       |
| C27-H21 | 0.95       |         |            |

**Table S4.** Bond angles (°) for **1**.

|             |            |             |            |
|-------------|------------|-------------|------------|
| O2-P1-O2    | 94.00(12)  | O2-P1-N1    | 111.14(9)  |
| O2-P1-N1    | 110.74(9)  | O2-P1-N1    | 110.74(9)  |
| O2-P1-N1    | 111.14(9)  | N1-P1-N1    | 116.79(15) |
| N2-P2-O3    | 106.41(8)  | N2-P2-N1    | 117.75(12) |
| O3-P2-N1    | 111.87(10) | N2-P2-O5    | 109.82(9)  |
| O3-P2-O5    | 98.35(9)   | N1-P2-O5    | 110.84(10) |
| C4-O1-C3    | 117.7(2)   | C7-O2-P1    | 125.28(14) |
| C8-O3-P2    | 125.21(14) | C11-O4-C12  | 117.6(2)   |
| C15-O5-P2   | 122.29(14) | C18-O6-C19  | 117.27(18) |
| P2-N1-P1    | 122.38(13) | P2-N2-P2    | 121.84(18) |
| C2-C1-H1    | 180.0      | C1-C2-C3    | 177.7(4)   |
| O1-C3-C2    | 112.6(2)   | O1-C3-H19   | 109.1      |
| C2-C3-H19   | 109.1      | O1-C3-H18   | 109.1      |
| C2-C3-H18   | 109.1      | H19-C3-H18  | 107.8      |
| C26-C4-O1   | 124.6(2)   | C26-C4-C5   | 120.2(2)   |
| O1-C4-C5    | 115.2(2)   | C6-C5-C4    | 120.1(2)   |
| C6-C5-H3    | 120.0      | C4-C5-H3    | 120.0      |
| C5-C6-C7    | 119.4(2)   | C5-C6-H4    | 120.3      |
| C7-C6-H4    | 120.3      | C27-C7-C6   | 121.1(2)   |
| C27-C7-O2   | 122.2(2)   | C6-C7-O2    | 116.4(2)   |
| C25-C8-C9   | 121.2(2)   | C25-C8-O3   | 122.5(2)   |
| C9-C8-O3    | 116.2(2)   | C10-C9-C8   | 119.0(2)   |
| C10-C9-H12  | 120.5      | C8-C9-H12   | 120.5      |
| C11-C10-C9  | 120.4(2)   | C11-C10-H17 | 119.8      |
| C9-C10-H17  | 119.8      | O4-C11-C10  | 115.3(2)   |
| O4-C11-C24  | 124.6(2)   | C10-C11-C24 | 120.1(2)   |
| O4-C12-C13  | 112.7(2)   | O4-C12-H15  | 109.1      |
| C13-C12-H15 | 109.1      | O4-C12-H16  | 109.1      |
| C13-C12-H16 | 109.1      | H15-C12-H16 | 107.8      |
| C14-C13-C12 | 177.4(3)   | C13-C14-H2  | 180.0      |
| C23-C15-C16 | 121.6(2)   | C23-C15-O5  | 117.4(2)   |
| C16-C15-O5  | 120.9(2)   | C15-C16-C17 | 118.8(2)   |
| C15-C16-H5  | 120.6      | C17-C16-H5  | 120.6      |
| C16-C17-C18 | 120.3(2)   | C16-C17-H6  | 119.9      |
| C18-C17-H6  | 119.9      | O6-C18-C17  | 114.9(2)   |
| O6-C18-C22  | 124.8(2)   | C17-C18-C22 | 120.3(2)   |
| O6-C19-C20  | 108.5(2)   | O6-C19-H9   | 110.0      |
| C20-C19-H9  | 110.0      | O6-C19-H8   | 110.0      |
| C20-C19-H8  | 110.0      | H9-C19-H8   | 108.4      |
| C21-C20-C19 | 177.5(3)   | C20-C21-H7  | 180.0      |
| C18-C22-C23 | 119.4(2)   | C18-C22-H11 | 120.3      |
| C23-C22-H11 | 120.3      | C15-C23-C22 | 119.6(2)   |
| C15-C23-H10 | 120.2      | C22-C23-H10 | 120.2      |
| C11-C24-C25 | 119.7(2)   | C11-C24-H13 | 120.1      |
| C25-C24-H13 | 120.1      | C8-C25-C24  | 119.5(2)   |
| C8-C25-H14  | 120.3      | C24-C25-H14 | 120.3      |
| C4-C26-C27  | 119.8(2)   | C4-C26-H20  | 120.1      |
| C27-C26-H20 | 120.1      | C7-C27-C26  | 119.3(2)   |



C7-C27-H21

120.3

C26-C27-H21

120.3

**Table S5.** Torsion angles (°) for **1**.

|                 |             |                 |             |
|-----------------|-------------|-----------------|-------------|
| O2-P1-O2-C7     | -160.5(2)   | N1-P1-O2-C7     | -46.1(2)    |
| N1-P1-O2-C7     | 85.43(19)   | N2-P2-O3-C8     | -166.90(17) |
| N1-P2-O3-C8     | -37.0(2)    | O5-P2-O3-C8     | 79.50(18)   |
| N2-P2-O5-C15    | 64.96(18)   | O3-P2-O5-C15    | 175.84(17)  |
| N1-P2-O5-C15    | -66.86(19)  | N2-P2-N1-P1     | 9.92(18)    |
| O3-P2-N1-P1     | -113.81(14) | O5-P2-N1-P1     | 137.52(13)  |
| O2-P1-N1-P2     | -133.46(13) | O2-P1-N1-P2     | 123.45(14)  |
| N1-P1-N1-P2     | -5.10(9)    | O3-P2-N2-P2     | 121.66(7)   |
| N1-P2-N2-P2     | -4.76(9)    | O5-P2-N2-P2     | -132.85(7)  |
| C4-O1-C3-C2     | 75.2(3)     | C3-O1-C4-C26    | 5.9(4)      |
| C3-O1-C4-C5     | -175.0(2)   | C26-C4-C5-C6    | 1.0(4)      |
| O1-C4-C5-C6     | -178.2(2)   | C4-C5-C6-C7     | -0.2(4)     |
| C5-C6-C7-C27    | 0.0(3)      | C5-C6-C7-O2     | 174.2(2)    |
| P1-O2-C7-C27    | -61.8(3)    | P1-O2-C7-C6     | 124.1(2)    |
| P2-O3-C8-C25    | -49.7(3)    | P2-O3-C8-C9     | 133.50(19)  |
| C25-C8-C9-C10   | 0.6(4)      | O3-C8-C9-C10    | 177.5(2)    |
| C8-C9-C10-C11   | 0.2(4)      | C12-O4-C11-C10  | -170.6(2)   |
| C12-O4-C11-C24  | 8.9(4)      | C9-C10-C11-O4   | 178.5(2)    |
| C9-C10-C11-C24  | -1.1(4)     | C11-O4-C12-C13  | -84.8(3)    |
| P2-O5-C15-C23   | 124.8(2)    | P2-O5-C15-C16   | -59.4(3)    |
| C23-C15-C16-C17 | -3.1(3)     | O5-C15-C16-C17  | -178.7(2)   |
| C15-C16-C17-C18 | 0.5(3)      | C19-O6-C18-C17  | 179.2(2)    |
| C19-O6-C18-C22  | 0.9(3)      | C16-C17-C18-O6  | -175.2(2)   |
| C16-C17-C18-C22 | 3.2(4)      | C18-O6-C19-C20  | -164.5(2)   |
| O6-C18-C22-C23  | 173.9(2)    | C17-C18-C22-C23 | -4.3(4)     |
| C16-C15-C23-C22 | 1.9(4)      | O5-C15-C23-C22  | 177.6(2)    |
| C18-C22-C23-C15 | 1.9(4)      | O4-C11-C24-C25  | -178.4(2)   |
| C10-C11-C24-C25 | 1.1(4)      | C9-C8-C25-C24   | -0.6(4)     |
| O3-C8-C25-C24   | -177.3(2)   | C11-C24-C25-C8  | -0.3(4)     |
| O1-C4-C26-C27   | 177.5(2)    | C5-C4-C26-C27   | -1.5(4)     |
| C6-C7-C27-C26   | -0.5(4)     | O2-C7-C27-C26   | -174.4(2)   |
| C4-C26-C27-C7   | 1.2(4)      |                 |             |

**Table S6.** Anisotropic atomic displacement parameters ( $\text{\AA}^2$ ) for **1**.

The anisotropic atomic displacement factor exponent takes the form:  $-2\pi^2 [h^2 a^{*2} U_{11} + \dots + 2 h k a^* b^* U_{12}]$

|     | $U_{11}$   | $U_{22}$   | $U_{33}$   | $U_{23}$    | $U_{13}$   | $U_{12}$    |
|-----|------------|------------|------------|-------------|------------|-------------|
| P1  | 0.0195(4)  | 0.0119(4)  | 0.0153(4)  | 0           | 0.0074(3)  | 0           |
| P2  | 0.0151(3)  | 0.0138(3)  | 0.0161(3)  | 0.0011(2)   | 0.0052(2)  | 0.0002(2)   |
| O1  | 0.0473(12) | 0.0541(14) | 0.0242(10) | -0.0145(9)  | 0.0224(9)  | -0.0265(11) |
| O2  | 0.0321(9)  | 0.0151(9)  | 0.0181(8)  | 0.0014(6)   | 0.0125(7)  | 0.0047(7)   |
| O3  | 0.0202(8)  | 0.0186(8)  | 0.0176(8)  | 0.0012(7)   | 0.0064(7)  | -0.0032(7)  |
| O4  | 0.0303(10) | 0.0401(11) | 0.0205(9)  | -0.0051(9)  | 0.0076(8)  | -0.0025(9)  |
| O5  | 0.0157(8)  | 0.0205(9)  | 0.0195(8)  | 0.0015(7)   | 0.0065(6)  | 0.0026(7)   |
| O6  | 0.0216(8)  | 0.0328(11) | 0.0236(9)  | -0.0052(7)  | 0.0118(7)  | -0.0064(7)  |
| N1  | 0.0175(10) | 0.0168(10) | 0.0173(10) | 0.0003(8)   | 0.0059(8)  | -0.0019(8)  |
| N2  | 0.0163(14) | 0.0144(14) | 0.0203(15) | 0           | 0.0043(11) | 0           |
| C1  | 0.056(2)   | 0.090(3)   | 0.077(3)   | 0.046(3)    | 0.040(2)   | 0.025(2)    |
| C2  | 0.0310(15) | 0.063(2)   | 0.0332(15) | 0.0135(17)  | 0.0159(12) | -0.0039(17) |
| C3  | 0.0364(15) | 0.0485(19) | 0.0286(15) | -0.0052(13) | 0.0210(13) | -0.0161(14) |
| C4  | 0.0236(13) | 0.0301(14) | 0.0202(12) | -0.0033(11) | 0.0098(10) | -0.0053(11) |
| C5  | 0.0219(12) | 0.0262(14) | 0.0191(11) | -0.0057(10) | 0.0053(9)  | -0.0062(10) |
| C6  | 0.0176(11) | 0.0174(12) | 0.0232(12) | 0.0000(9)   | 0.0066(9)  | -0.0010(9)  |
| C7  | 0.0225(12) | 0.0157(11) | 0.0141(11) | 0.0019(9)   | 0.0072(9)  | 0.0059(10)  |
| C8  | 0.0210(11) | 0.0160(12) | 0.0163(11) | 0.0031(9)   | 0.0041(9)  | 0.0010(10)  |
| C9  | 0.0176(11) | 0.0300(14) | 0.0219(12) | 0.0042(10)  | 0.0071(9)  | 0.0040(10)  |
| C10 | 0.0264(13) | 0.0362(15) | 0.0220(12) | 0.0007(12)  | 0.0112(10) | 0.0064(12)  |
| C11 | 0.0276(13) | 0.0225(13) | 0.0161(12) | 0.0016(9)   | 0.0052(10) | 0.0015(10)  |
| C12 | 0.0362(15) | 0.0326(15) | 0.0221(13) | -0.0056(12) | 0.0033(11) | -0.0064(13) |
| C13 | 0.0323(15) | 0.0400(16) | 0.0168(13) | -0.0047(12) | 0.0063(12) | -0.0070(13) |
| C14 | 0.0386(16) | 0.054(2)   | 0.0251(14) | -0.0030(14) | 0.0068(12) | 0.0074(16)  |
| C15 | 0.0175(11) | 0.0155(11) | 0.0204(12) | 0.0026(9)   | 0.0086(9)  | 0.0050(9)   |
| C16 | 0.0182(12) | 0.0161(12) | 0.0245(13) | -0.0015(10) | 0.0081(10) | -0.0006(9)  |
| C17 | 0.0187(12) | 0.0200(12) | 0.0221(12) | -0.0039(10) | 0.0052(10) | -0.0004(9)  |
| C18 | 0.0212(12) | 0.0174(12) | 0.0230(12) | -0.0006(9)  | 0.0104(10) | 0.0031(9)   |
| C19 | 0.0218(12) | 0.0298(15) | 0.0277(13) | 0.0001(11)  | 0.0096(10) | -0.0054(10) |
| C20 | 0.0236(13) | 0.0239(14) | 0.0323(14) | -0.0018(11) | 0.0131(11) | -0.0016(11) |
| C21 | 0.0400(16) | 0.0404(17) | 0.0323(15) | 0.0003(14)  | 0.0180(13) | -0.0071(14) |
| C22 | 0.0160(11) | 0.0218(12) | 0.0276(12) | -0.0013(11) | 0.0080(9)  | -0.0015(11) |
| C23 | 0.0175(11) | 0.0210(12) | 0.0197(11) | -0.0017(11) | 0.0033(9)  | -0.0001(11) |
| C24 | 0.0207(12) | 0.0295(14) | 0.0219(12) | 0.0010(11)  | 0.0075(10) | -0.0059(11) |
| C25 | 0.0242(12) | 0.0295(14) | 0.0179(11) | 0.0004(10)  | 0.0105(10) | -0.0016(10) |
| C26 | 0.0244(12) | 0.0242(13) | 0.0244(13) | -0.0050(10) | 0.0111(10) | -0.0092(11) |
| C27 | 0.0261(13) | 0.0197(12) | 0.0200(12) | -0.0045(10) | 0.0063(10) | -0.0011(11) |

**Table S7.** Hydrogen atomic coordinates and isotropic atomic displacement parameters ( $\text{\AA}^2$ ) for 1.

|     | <b>x/a</b> | <b>y/b</b> | <b>z/c</b> | <b>U(eq)</b> |
|-----|------------|------------|------------|--------------|
| H1  | 0.4715     | -0.0230    | 0.8979     | 0.084        |
| H19 | 0.3371     | 0.4007     | 0.8083     | 0.042        |
| H18 | 0.3721     | 0.4430     | 0.9026     | 0.042        |
| H3  | 0.5235     | 0.7266     | 0.8038     | 0.028        |
| H4  | 0.5426     | 0.7482     | 0.6819     | 0.024        |
| H12 | 0.5289     | 0.1460     | 0.7624     | 0.028        |
| H17 | 0.5972     | 0.2694     | 0.8882     | 0.033        |
| H15 | 0.8134     | 0.5372     | 1.0055     | 0.039        |
| H16 | 0.8090     | 0.4978     | 0.9158     | 0.039        |
| H2  | 0.9526     | 0.1190     | 1.0455     | 0.049        |
| H5  | 0.5781     | -0.0750    | 0.4174     | 0.023        |
| H6  | 0.6202     | -0.0605    | 0.3091     | 0.025        |
| H9  | 0.8482     | 0.0825     | 0.3329     | 0.032        |
| H8  | 0.8127     | 0.2724     | 0.3392     | 0.032        |
| H7  | 0.7992     | 0.2820     | 0.1098     | 0.043        |
| H11 | 0.8138     | 0.1799     | 0.4516     | 0.026        |
| H10 | 0.7695     | 0.1743     | 0.5588     | 0.024        |
| H13 | 0.7856     | 0.2908     | 0.8311     | 0.029        |
| H14 | 0.7171     | 0.1669     | 0.7045     | 0.028        |
| H20 | 0.3670     | 0.3433     | 0.7103     | 0.028        |
| H21 | 0.3848     | 0.3681     | 0.5868     | 0.027        |
